# Supplementary material for: Postharvest chilling diminishes melon flavor via effects on volatile acetate ester biosynthesis
Source: Front Plant Sci. 2023 Jan 6;13:1067680. doi: 10.3389/fpls.2022.1067680 (PMC9853462; doi:10.3389/fpls.2022.1067680)
Supplement: Supplementary file 2 [file Table_1.xlsx]

## Sheet: Sheet1
Supplementary Table S1. GC-IMS analysis of VOCs from Group A, B and C. Red asterisks indicate significantly higher levels of VOCs in group C than B, and blue asterisks indicate significantly higher levels of VOCs in group B than C.
				peak volume (intensity)
	RI	Rt [sec]	Dt [RIPrel]	[+] A1	[+] A2	[+] A3	[+] B1	[+] B2	[+] B3	[+] C1	[+] C2	[+] C3
3-Methylbutanal	650.1	151.471	1.40931	969.657	903.082	793.461	1066.7	939.733	940.663	413.651	710.302	308.35	Aldehydes
2-Methylbutanal	653.4	152.326	1.16109	143.72	344.426	172.216	232.751	84.9178	113.671	34.3302	276.483	43.9443
Pentanal	690.3	162.295	1.42059	348.504	781.365	395.588	513.16	485.057	465.664	290.747	388.078	282.326
(E)-2-Pentenal	744.2	184.28	1.10454	133.849	117.331	106.308	109.961	71.9075	99.6357	26.4237	112.852	102.311
Hexanal	787.7	202.387	1.25874	99.8039	164.433	46.6422	148.944	42.1129	85.9208	30.0167	180.164	34.9015
(E)-2-Hexenal-D	844.1	231.683	1.51557	841.741	1173.36	495.224	282.691	156.225	255.407	110.824	1342.42	240.499
(E)-2-Hexenal-M	845.6	232.44	1.17932	324.696	645.139	454.355	353.484	117.223	246.923	143.764	595.062	144.793
Heptanal-D	899.3	262.709	1.70627	339.024	343.556	370.291	240.124	497.334	311.854	442.243	348.882	396.102
Heptanal-M	899.8	263.087	1.32925	427.839	779.448	681.485	639.451	339.493	598.224	326.232	684.671	450.8
Benzaldehyde-D	956.9	311.453	1.4693	29.8295	26.7316	25.6334	30.7214	29.6422	22.6689	29.62	31.5879	33.2923
Benzaldehyde-M	957.5	311.895	1.14826	112.681	66.2482	57.6244	62.9789	60.7127	59.9573	103.832	76.9669	75.237
*Nonanal-M	1107.7	504.53	1.4833	1755.92	1173.54	1832.52	1223.83	1259.78	1000.79	2716.29	2216.63	1446.53
Nonanal-D	1108.4	505.537	1.94563	419.187	229.082	448.045	211.091	242.248	171.588	1032.98	580.297	249.434
(E,Z)-2-6-Nonadienal	1177.1	604.272	1.3719	1118.6	1888.01	1863.28	631.145	491.907	236.382	417.197	646.878	350.488
(E)-2-Nonenal	1187.7	619.385	1.40903	697.561	1529.62	1245.44	670.065	373.63	286.84	492.703	588.061	308.064
*(E,E)-2,4-Nonadienal	1262.5	726.865	1.34159	276.584	197.776	231.764	175.266	246.234	214.894	415.933	280.431	357.252
Ethanol	459.6	101.15	1.04685	2245.26	2466.35	3308.97	2144.89	2462.35	2287.58	4242.07	2124.96	3252.25	Alcohols
3-Methyl-1-butanol	726	176.859	1.2454	110.996	188.969	98.7978	134.667	70.5871	105.952	26.0873	144.872	53.0411
(Z)-2-Pentenol	743.6	184.01	1.45007	410.718	217.811	490.672	296.863	632.821	542.663	402.933	326.524	974.967
1-Pentanol	756.9	189.434	1.25054	34.1049	52.0222	33.0035	40.6307	21.8373	27.2109	16.4922	55.7358	30.4452
2-Methyl-1-pentanol	839.7	229.413	1.58253	400.866	220.794	299.901	227.327	235.252	360.318	126.723	605.019	374.947
*3-Methylpentanol	841.2	230.17	1.60728	433.346	623.889	656.28	272.391	336.113	309.578	511.884	461.992	425.446
1-Hexanol	866.8	243.501	1.63785	157.857	186.001	138.14	110.84	71.3933	89.3011	154.721	114.258	75.1069
1-Octen-3-ol	980.3	331.191	1.15805	389.186	448.448	327.115	521.93	341.274	388.834	301.913	358.518	443.198
Octanol	1070.5	451.132	1.44988	424.941	118.451	145.259	122.34	120.067	121.663	115.601	144.447	116.661
*2-Propanone	469.6	103.798	1.11672	810.588	875.9	852.968	768.348	842.43	842.1	1064.72	927.71	952.787	Ketones
2-Hexanone	786.6	201.793	1.48646	94.9699	26.7062	21.6183	34.6889	31.1054	27.5283	25.3795	245.349	34.2001
2-Heptanone	887.8	254.385	1.62038	124.26	88.4854	108.072	105.206	99.2644	94.8334	182.132	303.392	170.493
*3-Hepten-2-one-M	934.6	292.599	1.20375	1554.11	894.82	1270.08	864.41	1192.16	1052.79	1547.37	1963.22	1586.57
*3-Hepten-2-one-D	934.6	292.599	1.60688	1245.75	223.816	662.812	239.997	758.055	435.33	2721.5	3081.33	2183.23
6-Methyl-5-hepten-2-one	988.3	338.002	1.17437	158.933	168.353	331.958	132.541	138.562	173.276	430.248	189.248	204.604
2-Octanone-M	993.4	342.322	1.33662	997.509	887.491	1508.13	657.245	704.607	705.064	1400.86	732.704	731.339
2-Octanone-D	994.3	343.11	1.75867	449.023	340.534	1039.72	236.865	228.098	232.694	686.217	243.701	209.409
Ethyl Acetate	591.4	135.959	1.33216	19688.2	20768.8	19503.3	17592.4	15661.8	19802.4	24150.9	17883.4	23961.3	Acetate esters
Isopropyl acetate	645.9	150.336	1.48064	146.532	235.5	93.951	263.682	113.087	143.415	19.9551	74.1578	13.534
*Propyl acetate	703.6	167.741	1.48355	2229.46	1698.1	2273.82	1437.01	1955.12	1853.45	2476.23	2458.58	3044.2
*Isobutyl acetate	762.2	191.577	1.61456	5410.94	5697.01	5793.09	3101.49	4256.75	3813.95	7567.67	6408.95	6533.31
Butyl acetate-M	800.4	208.982	1.23609	917.432	1160.35	1025.35	1215.86	861.674	1072.19	666.068	1223.32	780.692
Butyl acetate-D	801.9	209.738	1.61893	9062.56	7061.89	8136.32	6030.22	8508.37	7678.14	7285.34	8154.71	9266.41
*Pentyl acetate-M	911.4	272.924	1.31033	825.88	617.706	855.405	329.337	695.676	518.724	819.082	1055.02	1029.25
*Pentyl acetate-D	911.4	272.924	1.75867	999.312	315.145	719.106	110.678	604.293	254.484	1246.59	993.881	1859.64
*Hexyl acetate-D	1016.4	373.555	1.89735	7401.69	7285.02	5749.52	2432.21	2067.48	4186.63	6641.23	6706.91	12091.3
Hexyl acetate-M	1017.1	374.563	1.38675	2980.59	1275.17	2365.15	1289.21	2688.84	1907.06	2291.14	2545.15	3355.31
*Benzyl acetate	1193.5	627.77	1.32876	230.65	198.675	217.849	217.052	213.678	227.143	374.385	449.854	403.215
Ethyl formate	500	111.828	1.22945	156.473	178.536	167.055	179.101	162.173	184.027	155.324	208.467	171.67	Other esters
Ethyl propanoate	702.7	167.362	1.45298	3383.45	3029.14	3394.51	2963.02	2883.45	3420.14	4971.98	4287.41	4153.35
Ethyl 2-methylpropanoate	745.4	184.767	1.56507	335.78	360.451	729.066	347.197	1327.91	673.604	3722.23	398.702	1299.41
Ethyl butanoate	789.5	203.306	1.55924	3023.61	3840.66	4777.73	2629.37	2993.74	3513.39	6204.27	5282.78	5265.38
Ethyl 2-methylbutanoate	838.3	228.656	1.65241	305.535	472.663	1224.02	344.908	2701.52	693.959	5805.17	334.589	3307.22
Isobutyl propanoate	859.4	239.629	1.27684	110.107	104.822	93.9225	50.3654	203.626	191.225	237.474	329.609	168.617
Propyl butanoate-M	897.5	261.195	1.27102	86.1017	96.7474	109.713	73.4246	202.099	113.973	282.142	109.056	147.373
Propyl butanoate-D	898	261.574	1.6888	303.456	554.892	593.037	302.989	530.624	409.693	1100.07	437.815	425.176
*Isobutyl butanoate	952.1	307.355	1.33216	182.021	122.952	134.229	135.074	701.779	487.898	683.221	449.838	422.783
*Butyl butanoate	972.2	324.381	1.34248	195.288	99.3247	83.061	66.3212	291.68	182.421	497.81	399.432	367.904
*Isopentyl isopentanoate	1125.2	529.717	1.46102	203.039	58.5163	172.553	127.323	167.725	137.207	215.215	254.966	257.48
Hexyl butanoate-M	1162.4	583.115	1.50372	4798.94	751.818	802.009	1126.97	1219.19	976.983	908.983	1108.65	1246.36
Hexyl butanoate-D	1163.8	585.13	2.08117	1480.39	368.869	299.123	299.859	342.337	309.181	279.485	300.155	310.756
Isopentyl hexanoate-D	1296.7	775.953	2.14594	217.741	200.144	218.535	219.369	200.817	207.784	243.933	228.272	198.611
*Isopentyl hexanoate-M	1299.4	779.778	1.5339	340.531	332.958	349.974	379.365	331.269	332.869	420.894	450.81	451.695
*Methyl 2-methylpropanoate	677.4	158.66	1.44133	706.28	561.094	367.828	1680.63	1847.97	1612.96	29.9977	174.987	31.0515
*Methyl butanoate	715.3	172.506	1.43011	1010.93	657.756	470.177	2104.76	2371.85	1817.72	385.066	337.922	396.102
*Methyl 3-methylbutanoate	767.8	193.847	1.53013	444.449	151.144	223.616	1477.51	1357.6	1147.97	94.097	121.581	153.931
*Methyl hexanoate-M	920.8	280.87	1.28703	270.906	199.173	186.563	323.265	696.482	381.835	212.901	209.178	193.587
Methyl hexanoate-D	921.2	281.248	1.68006	64.3438	29.4486	35.9395	46.9184	326.861	87.7807	72.0979	39.3547	63.9312
2,5-Dimethylfuran	732.4	179.47	1.35254	263.926	137.064	213.288	116.134	131.046	146.313	295.073	123.177	313.432	Others
2-Methylpropionic acid	777.7	197.887	1.16315	201.614	214.031	107.184	94.8969	38.7929	53.9457	30.4484	52.1746	44.322
Butanoic acid	839	229.035	1.15894	148.595	100.48	113.598	156.749	73.4976	237.506	21.8055	416.435	113.528
2-Methyl-3-furanthiol	895.7	259.682	1.14001	156.641	206.013	332.482	121.651	134.924	114.954	370.024	153.692	246.644
*2-Acetylfuran	906	268.384	1.11672	77.973	41.1417	42.0272	298.402	156.054	236.179	20.4566	29.7215	24.7256
2-Pentylfuran	992.4	341.497	1.25393	177.317	207	254.693	197.729	133.55	90.466	272.487	218.849	120.787
alpha-Phellandrene	1001.9	352.758	1.22299	150.956	157.746	165.674	220.588	174.641	168.35	123.838	228.803	183.189
2-Formyl-5-methylthiophene	1105.6	501.507	1.17137	1018.93	700.751	1575.99	1143.9	971.968	699.189	1754.61	1469.89	713.053
Maltol	1124.5	528.675	1.15772	104.336	68.2446	199.37	121.146	110.3	86.2064	139.19	139.432	167.09
*1	1134.3	542.815	1.20293	341.988	299.948	408.062	284.802	272.877	292.423	646.977	812.432	898.721	Unknown
2	1063.4	441.057	1.28834	106.203	69.1556	99.2929	77.7127	281.917	114.344	149.817	104.359	333.656
3	1007.5	360.703	0.97363	376.115	252.801	436.342	329.527	443.195	357.839	340.417	524.501	705.668
*4	918.6	278.978	0.94588	168.531	139.847	190.184	105.27	98.3915	107.12	152.344	195.326	230.304
5	952.1	307.355	1.76013	146.164	106.082	171.464	105.73	326.023	143.498	347.076	309.124	107.45
6	827.4	222.981	1.21862	554.997	639.93	420.171	458.113	227.108	208.832	144.393	202.328	124.704
7	827.4	222.981	1.48937	845.855	392.82	209.098	165.363	139.974	132.334	145.71	121.248	228.742
8	924.8	284.275	1.35691	89.0123	55.8374	67.6162	52.6792	106.203	73.9357	149.35	77.0589	185.693
9	924.4	283.897	1.79506	41.6083	28.9725	39.3388	27.4489	48.3943	36.1965	54.5805	33.2606	39.6308

## Sheet: Sheet2
Supplementary Table S2. Measurement of metabolites derived from fatty acid and amino acid pathways.
ID	name	mz	rt	exact_mass	ppm	formula	KEGG	type	library	identify.pvalue	A1	A2	A3	A4	A5	A6	B1	B2	B3	B4	B5	B6	C1	C2	C3	C4	C5	C6
M261T827	Linolenic acid	261.221	827.228	278.225	13.8422	C18H30O2	C06427	[M+H-H2O]+	BioDeepDB	5.53024e-06	5.88192e+08	8.3608e+08	5.54989e+08	5.6413e+08	5.72001e+08	9.10587e+08	1.01441e+09	1.03142e+09	1.01327e+09	9.74926e+08	9.24731e+08	1.33613e+09	7.08585e+08	1.16185e+09	7.74554e+08	7.55048e+08	9.18433e+08	8.37259e+08
M281T816	Linoleic acid	281.247	816.348	280.24	0.429918	C18H32O2	C01595	[M+H]+	BioDeepDB	2.78768e-14	3.13754e+06	3.06706e+06	3.20117e+06	3.07341e+06	2.81741e+06	3.27044e+06	4.86154e+07	3.84733e+07	4.79521e+07	2.37956e+07	3.26896e+07	4.14927e+07	1.13154e+07	3.33177e+06	3.26231e+06	3.05853e+06	3.3067e+06	3.42136e+06
M293T785	9(S)-HPOT	293.211	785.479	310.214	0.980394	C18H30O4	C16321	[M+H-H2O]+	BioDeepDB	4.85565e-07	1.5164e+07	1.73338e+07	1.93516e+07	2.18551e+07	1.45128e+07	1.62116e+07	2.25346e+07	2.65018e+07	5.61284e+06	2.26496e+07	4.46673e+07	2.06659e+07	5.84153e+06	2.36757e+07	2.22414e+07	3.85363e+07	2.37499e+07	2.1803e+07
M293T587	13(S)-HpOTrE	293.211	586.999	310.214	13.0633	C18H30O4	C04785	[M+H-H2O]+	BioDeepDB	0.0016454	7.85684e+06	5.41072e+06	4.57937e+06	1.12291e+07	1.42716e+07	1.37946e+07	1.39056e+07	1.01296e+07	1.11861e+07	1.61151e+07	1.61086e+07	1.82854e+07	8.89861e+06	8.85946e+06	8.71386e+06	9.95575e+06	1.091e+07	1.10154e+07
M132T220	L-Isoleucine	132.066	220.046	131.095	0.0534671	C6H13NO2	C00407	[M+H]+	BioDeepDB	7.71813e-21	2.29234e+08	1.5402e+08	2.44981e+08	1.6345e+08	1.80658e+08	1.86508e+08	1.10926e+08	1.27699e+08	2.80688e+08	1.50127e+08	1.95241e+08	1.18724e+08	3.27133e+08	1.02519e+08	1.7625e+08	3.3399e+08	3.25316e+08	1.5218e+08
M132T237_1	L-Leucine	132.021	236.845	131.095	4.40834	C6H13NO2	C00123	[M+H]+	BioDeepDB	7.43972e-26	2.4899e+07	4.04586e+07	3.93565e+07	3.61157e+07	1.96939e+07	1.36629e+07	3.01005e+07	3.0689e+07	3.38892e+07	4.12734e+07	2.31094e+07	1.91725e+07	1.49257e+07	3.32492e+07	1.65862e+07	2.07456e+07	2.18943e+07	2.6309e+07
M118T139	L-Valine	118.058	138.853	117.079	24.3553	C5H11NO2	C00183	[M+H]+	BioDeepDB	1.87704e-09	5.73876e+07	4.55897e+07	6.50015e+07	6.09506e+07	2.28149e+07	3.80452e+07	7.25042e+07	7.19479e+07	1.41486e+08	4.38897e+07	7.70259e+07	5.65268e+07	8.51095e+07	1.40994e+08	3.02232e+09	9.07601e+07	8.35686e+07	5.87669e+07
M164T333	L-Phenylalanine	164.071	333.298	165.079	2.97469	C9H11NO2	C00079	[M-H]-	BioDeepDB	3.44091e-13	2.05372e+08	1.64424e+08	1.78238e+08	1.80906e+08	2.44909e+08	2.39301e+08	1.70495e+08	1.83945e+08	2.00733e+08	2.55188e+08	1.92351e+08	1.911e+08	3.97222e+08	4.63803e+08	4.61312e+08	4.61347e+08	4.05932e+08	4.00788e+08
M148T141_2	L-Methionine	148.043	140.563	149.051	4.12675	C5H11NO2S	C00073	[M-H]-	BioDeepDB	0.00242234	1.13591e+09	1.27783e+09	9.42327e+08	1.29394e+09	1.10911e+09	1.15559e+09	1.15611e+09	9.59056e+08	1.54948e+09	1.05185e+09	1.09437e+09	8.40292e+08	1.34634e+09	1.09391e+09	1.1525e+09	1.25051e+09	1.17454e+09	1.0673e+09
M129T320	Ketoisocaprorate	129.054	320.418	130.063	10.9465	C6H10O3	C00233	[M-H]-	MoNA	4.29755e-06	1.01554e+08	9.43082e+07	2.64011e+07	1.10292e+08	1.01119e+08	1.14381e+08	8.51408e+07	9.1866e+07	2.74021e+07	2.35683e+07	8.68849e+07	9.14192e+07	1.33195e+08	1.28606e+08	1.30158e+08	1.34298e+08	1.27803e+08	1.28767e+08
M113T657	3-Methyl-2-oxovaleric acid	113.06	656.791	130.063	0.14415	C6H10O3	C03465	[M+H-H2O]+	BioDeepDB	0.00289217	5.23573e+07	1.76959e+08	5.90957e+07	1.5014e+07	3.46435e+08	6.53725e+07	3.46294e+08	4.60337e+08	2.73248e+07	3.49296e+07	2.86466e+08	1.84798e+08	6.76101e+07	3.27738e+08	2.49669e+07	2.35227e+08	6.36125e+07	2.71955e+07
M175T162	Citric acid	175.024	162.338	192.027	24.9394	C6H8O7	C00158	[M+H-H2O]+	BioDeepDB	2.46069e-07	5.06849e+08	4.16969e+08	3.88737e+08	3.71825e+08	3.56282e+08	3.88888e+08	2.99071e+08	3.80106e+08	3.14027e+08	3.34577e+08	2.65609e+08	2.90601e+08	2.31719e+08	3.29214e+08	2.84746e+08	2.53483e+08	2.36392e+08	2.58896e+08
M179T461	D-Glucose	179.052	461.174	180.063	25.0824	C6H12O6	C00031	[M-H]-	MoNA	1.18581e-06	2.02603e+08	2.13305e+08	2.21884e+08	1.75103e+08	3.70074e+08	2.54993e+08	2.62794e+08	2.77998e+08	5.23629e+08	2.9019e+08	3.06881e+08	3.68988e+08	4.42284e+08	2.61471e+08	2.87871e+08	4.29807e+08	6.19794e+08	3.36612e+08
M181T734	D-Galactose	181.014	733.938	180.063	0.654495	C6H12O6	C00124	[M+H]+	BioDeepDB	1.10616e-08	1.64266e+08	2.95149e+08	8.38356e+07	5.62848e+08	8.13458e+07	1.79621e+08	6.51781e+08	2.91597e+08	7.60429e+07	7.58766e+07	3.16351e+08	2.54945e+08	2.9751e+08	7.06893e+07	4.38064e+08	3.35637e+08	6.88809e+07	6.69596e+07
M163T262	D-Fructose	163.059	261.964	180.063	7.93563	C6H12O6	C00095	[M+H-H2O]+	BioDeepDB	0.00054991	2.93195e+08	4.12991e+08	5.66684e+08	3.69537e+08	5.42855e+08	4.58592e+08	7.08093e+08	4.37812e+08	1.55488e+08	2.06477e+09	6.12927e+08	4.7787e+08	7.87889e+07	3.0659e+08	3.19962e+08	4.3755e+08	4.11088e+08	2.48369e+08
M343T733	Sucrose	343.295	732.995	342.116	0.337771	C12H22O11	C00089	[M+H]+	BioDeepDB	8.43819e-06	1.5305e+07	1.39047e+07	1.4924e+07	1.45523e+07	1.61748e+07	1.49507e+07	1.86112e+07	1.93317e+07	1.89582e+07	2.30503e+07	2.17848e+07	2.15359e+07	1.05959e+07	1.15138e+07	1.19943e+07	1.03187e+07	1.43137e+07	1.17815e+07

## Sheet: Sheet3
Supplementary Table S3. Transcriptional profiling of melon fruits from Group A, B, and C.
Gene_ID	A1:read count	A1:fpkm	A2:read count	A2:fpkm	A3:read count	A3:fpkm	B1:read count	B1:fpkm	B2:read count	B2:fpkm	B3:read count	B3:fpkm	C1:read count	C1:fpkm	C2:read count	C2:fpkm	C3:read count	C3:fpkm	Chromosome	Start Site	End Site	Direction	Length	Name	GO	KEGG	Description
MELO3C000001.2	0	0	0	0	0	0	0	0	0	0	0	0	0	0	0	0	0	0	chr00	7971483	7971732	+	250	-	-	-	protein Ycf2-like
MELO3C000003.2	910	59.0224	910	59.5261	1007	57.0776	969	64.8932	1109	76.5581	1421	81.3247	675	46.9018	758	48.8112	694	46.7692	chr00	7947386	7948445	-	928	-	GO:0016020;GO:0016021	-	Stress-related ozone-induced family protein
MELO3C000004.2	0	0	0	0	0	0	0	0	0	0	0	0	0	0	0	0	0	0	chr00	7973607	7973853	-	247	-	-	-	Unknown protein
MELO3C000009.2	531	8.47543	741	11.9282	576	8.03433	106	1.74692	226	3.83937	272	3.83079	462	7.89986	531	8.41465	343	5.68834	chr00	8064262	8073121	+	3771	-	GO:0000166;GO:0005524;GO:0006810;GO:0016020;GO:0016021;GO:0016887;GO:0042626;GO:0055085	K05658	ABC transporter B family protein
MELO3C000012.2	0	0	0	0	0	0	0	0	1	0.328529	0	0	0	0	0	0	0	0	chr00	8039240	8039662	+	195	-	-	K12831	Unknown protein
MELO3C000014.2	74	10.3342	83	11.69	108	13.1805	73	10.5261	57	8.47238	104	12.8154	74	11.071	81	11.2307	64	9.28648	chr00	8044522	8045469	+	431	-	GO:0000398;GO:0000956	K12626	sm-like protein LSM7
MELO3C000019.2	71	3.70962	12	0.632329	24	1.09583	248	13.379	386	21.4656	298	13.7385	94	5.2615	70	3.63115	122	6.62301	chr00	8128842	8129993	-	1152	-	GO:0003676	-	zinc finger protein ZAT10-like
MELO3C000022.2	0	0	0	0	0	0	0	0	0	0	0	0	0	0	0	0	0	0	chr00	8220497	8220688	-	192	-	-	-	Unknown protein
MELO3C000026.2	0	0	0	0	0	0	2	0.344307	0	0	0	0	1	0.178619	2	0.331071	1	0.173237	chr00	8257582	8257942	-	361	-	-	-	6,7-dimethyl-8-ribityllumazine synthase
MELO3C000027.2	2	0.206838	5	0.521508	6	0.542266	12	1.28139	6	0.660444	11	1.0038	7	0.775549	10	1.02677	5	0.537273	chr00	8211345	8212347	+	582	-	GO:0001731;GO:0003743;GO:0005737;GO:0005852;GO:0006413;GO:0006446;GO:0016282;GO:0033290	K15030	eukaryotic translation initiation factor 3 subunit M
MELO3C000029.2	0	0	0	0	0	0	0	0	0	0	0	0	0	0	0	0	0	0	chr00	8260612	8262147	-	1253	-	GO:0003677;GO:0003680;GO:0003700;GO:0005634;GO:0006351;GO:0006355;GO:0009640;GO:0009647;GO:0009908;GO:0010228;GO:0042826;GO:0043621	-	AT-hook motif nuclear-localized protein 22
MELO3C000030.2	121	6.21414	106	5.49025	216	9.69416	733	38.8687	772	42.1985	908	41.1466	192	10.5635	173	8.82098	151	8.05745	chr00	8275655	8277317	-	1172	-	GO:0003700;GO:0006355;GO:0043565	-	LOW QUALITY PROTEIN: probable WRKY transcription factor 48
MELO3C000031.2	0	0	0	0	2	0.310323	0	0	1	0.188977	0	0	1	0.19021	0	0	4	0.737919	chr00	8308914	8309252	-	339	-	GO:0046872	-	Zinc finger, CCCH-type
MELO3C000032.2	21	8.10249	14	5.44776	17	5.73203	23	9.16277	28	11.4985	54	18.3842	17	7.02681	12	4.59679	13	5.21155	chr00	8251246	8251599	-	156	-	GO:0003723;GO:0019013;GO:0030529	K14560	U3 small nucleolar ribonucleoprotein IMP3
MELO3C000034.2	0	0	0	0	0	0	0	0	0	0	0	0	0	0	0	0	0	0	chr00	8321214	8321473	-	260	-	-	-	Unknown protein
MELO3C000036.2	1	0.086729	0	0	4	0.303169	0	0	1	0.0923099	2	0.153055	3	0.278738	5	0.430535	4	0.360453	chr00	8278372	8281968	-	694	-	GO:0003723;GO:0005622;GO:0019013;GO:0019843;GO:0030529	K14560	U3 small nucleolar ribonucleoprotein protein IMP3
MELO3C000039.2	188	17.5983	207	19.5422	236	19.3057	78	7.53888	59	5.87826	63	5.20362	202	20.257	204	18.9591	229	22.2727	chr00	8402760	8403843	+	643	-	GO:0000166;GO:0000287;GO:0003723;GO:0004812;GO:0004826;GO:0005524;GO:0005737;GO:0006432	K01890	tRNA synthetase beta subunit family protein
MELO3C000043.2	0	0	0	0	0	0	0	0	0	0	0	0	0	0	0	0	0	0	chr00	8317478	8317756	+	279	-	-	-	Unknown protein
MELO3C000044.2	16	1.91079	23	2.7702	37	3.86149	12	1.4797	9	1.14398	14	1.47528	15	1.91909	19	2.25279	9	1.11676	chr00	8465918	8467177	+	504	-	GO:0000226;GO:0000922;GO:0005737;GO:0005815;GO:0005856;GO:0005874;GO:0007020;GO:0043015	K16571	Gamma-tubulin complex component
MELO3C000046.2	0	0	0	0	0	0	5	0.463096	3	0.286422	6	0.474903	3	0.288292	1	0.0890586	0	0	chr00	8524717	8525483	-	671	-	GO:0006629	-	phospholipase A1-IIbeta-like
MELO3C000047.2	0	0	0	0	0	0	0	0	0	0	0	0	0	0	0	0	0	0	chr00	8539759	8541488	-	973	-	GO:0016491;GO:0055114	K19642	D-galacturonate reductase-like
MELO3C000049.2	0	0	0	0	0	0	0	0	0	0	0	0	0	0	0	0	0	0	chr00	8618451	8618685	+	235	-	GO:0003677;GO:0005634;GO:0006351;GO:0006355;GO:0009725;GO:0009734	K14486	Auxin response factor
MELO3C000051.2	5	1.23848	1	0.249809	1	0.21646	3	0.767253	1	0.263634	2	0.437119	1	0.265355	2	0.491838	1	0.257361	chr00	8486485	8486727	-	243	-	GO:0004842;GO:0016567;GO:0016740	-	RING-type E3 ubiquitin transferase
MELO3C000059.2	0	0	0	0	0	0	0	0	0	0	0	0	0	0	0	0	0	0	chr00	8708449	8708796	-	348	-	GO:0016020;GO:0016021	-	NBS-LRR type resistance protein
MELO3C000061.2	138	9.37495	129	8.83833	156	9.26136	47	3.29676	72	5.20603	72	4.31594	93	6.76836	167	11.2637	93	6.56444	chr00	8723487	8726932	-	886	-	GO:0005783;GO:0006886;GO:0016021	K14009	B-cell receptor-associated protein 31-like
MELO3C000062.2	260	18.9231	212	15.5613	227	14.4379	60	4.50888	44	3.40843	41	2.63302	273	21.2859	322	23.2674	369	27.9042	chr00	8699335	8700202	-	827	-	GO:0006952;GO:0043531	-	Vat protein
MELO3C000064.2	322	16.151	200	10.1173	262	11.4843	127	6.57727	143	7.63418	192	8.4976	941	50.5641	3550	176.785	2820	146.966	chr00	8694226	8695538	+	1200	-	GO:0004497;GO:0005506;GO:0016020;GO:0016021;GO:0016491;GO:0016705;GO:0020037;GO:0046872;GO:0055114	K04123	Cytochrome P450 family ent-kaurenoic acid oxidase
MELO3C000065.2	2221	111.774	1919	97.3998	2245	98.7345	944	49.0528	1121	60.0457	1260	55.952	1132	61.0308	1544	77.1462	1485	77.6504	chr00	8714125	8715406	+	1196	-	GO:0005773;GO:0005774;GO:0006810;GO:0006811;GO:0015078;GO:0015991;GO:0015992;GO:0016020;GO:0016021;GO:0033177;GO:0033179	K02155	V-type proton ATPase proteolipid subunit
MELO3C000067.2	30	1.1044	42	1.55936	44	1.41553	2	0.0760214	2	0.0783646	0	0	37	1.45921	56	2.04677	46	1.7595	chr00	8771306	8779698	-	1635	-	GO:0005789;GO:0016021	-	reticulon-like protein B16
MELO3C000068.2	0	0	2	0.190592	0	0	0	0	0	0	0	0	0	0	0	0	0	0	chr00	8844953	8846212	+	637	-	GO:0048544	-	LOB domain-containing protein 16
MELO3C000069.2	0	0	0	0	0	0	0	0	0	0	0	0	0	0	0	0	0	0	chr00	8767183	8767562	+	380	-	-	-	Unknown protein
MELO3C000070.2	1	0.0413676	6	0.250324	0	0	35	1.49496	25	1.10074	40	1.46007	1	0.0443171	0	0	2	0.0859637	chr00	8808285	8809864	+	1455	-	GO:0005215;GO:0008643;GO:0016020;GO:0016021;GO:0022857;GO:0022891;GO:0055085	-	sugar transport protein 10-like
MELO3C000071.2	0	0	0	0	0	0	0	0	0	0	0	0	0	0	0	0	0	0	chr00	8745148	8745378	-	231	-	-	-	Unknown protein
MELO3C000075.2	15	1.19267	13	1.04247	4	0.277938	8	0.656776	3	0.253883	7	0.491109	7	0.596261	10	0.789409	4	0.330455	chr00	8853333	8855067	-	757	-	GO:0016020;GO:0016021	-	Myosin heavy chain-like protein, putative
MELO3C000076.2	0	0	0	0	0	0	0	0	0	0	1	0.156667	0	0	0	0	0	0	chr00	8834266	8834604	-	339	-	GO:0004088;GO:0016874	-	LOB domain-containing protein 4
MELO3C000081.2	85	13.3233	93	14.7016	100	13.6979	55	8.90133	86	14.3475	66	9.12828	90	15.1128	110	17.1183	97	15.7975	chr00	8989056	8989918	-	384	-	GO:0003676;GO:0003677;GO:0003887;GO:0006139;GO:0006260;GO:0006261;GO:0008408;GO:0071897;GO:0090305	K02335	DNA polymerase
MELO3C000082.2	0	0	0	0	0	0	0	0	0	0	0	0	0	0	0	0	0	0	chr00	8972136	8972292	+	157	-	-	-	Unknown protein
MELO3C000083.2	0	0	0	0	1	0.0623959	0	0	0	0	0	0	0	0	1	0.0708877	0	0	chr00	8991795	8992970	+	843	-	GO:0016740	K13667	O-glucosyltransferase rumi homolog
MELO3C000084.2	0	0	1	0.0965081	0	0	0	0	0	0	0	0	1	0.102514	0	0	0	0	chr00	8915024	8915652	+	629	-	GO:0008152;GO:0008168;GO:0016740;GO:0032259	-	Methyltransferase
MELO3C000086.2	0	0	15	1.22386	6	0.424192	0	0	0	0	0	0	1	0.0866684	19	1.52609	7	0.588401	chr00	8969506	8970563	+	744	-	GO:0004721;GO:0005634;GO:0006470;GO:0016787;GO:0046872	-	Serine/threonine-protein phosphatase 7 long form homolog
MELO3C000087.2	0	0	0	0	0	0	0	0	0	0	0	0	0	0	0	0	0	0	chr00	9089986	9091544	-	519	-	GO:0007275	-	axial regulator YABBY 1-like
MELO3C000089.2	0	0	0	0	0	0	0	0	0	0	0	0	0	0	0	0	0	0	chr00	9038682	9038869	-	188	-	GO:0016491;GO:0055114	-	ferric reduction oxidase 7, chloroplastic
MELO3C000090.2	0	0	0	0	0	0	0	0	0	0	0	0	0	0	0	0	0	0	chr00	9015800	9016633	+	712	-	-	-	GATA zinc finger domain-containing protein 10-like isoform X2
MELO3C000093.2	90	6.24809	110	7.70172	111	6.73423	68	4.87431	81	5.98513	101	6.18698	166	12.3459	170	11.7173	180	12.9838	chr00	9047595	9049029	-	867	-	GO:0004672;GO:0005524;GO:0006468;GO:0016301;GO:0016310	K02218	casein kinase I
MELO3C000099.2	0	0	2	0.0978301	4	0.16954	2	0.100157	1	0.0516221	2	0.0855922	6	0.311755	1	0.0481533	0	0	chr00	9276282	9277522	+	1241	-	GO:0003677	-	zinc-finger homeodomain protein 10-like
MELO3C000100.2	40	3.82766	45	4.34286	37	3.0941	55	5.4342	48	4.88876	41	3.46186	52	5.33073	42	3.99022	34	3.38047	chr00	9298635	9299330	-	629	-	GO:0000287;GO:0009055;GO:0009507;GO:0009522;GO:0009535;GO:0009536;GO:0009579;GO:0015979;GO:0016020;GO:0016021;GO:0016168;GO:0016491;GO:0018298;GO:0046872;GO:0051536;GO:0051539;GO:0055114	K02690	Photosystem I P700 chlorophyll a apoprotein A2
MELO3C000101.2	43	6.25161	26	3.8123	42	5.33621	53	7.95608	35	5.41596	37	4.74654	48	7.4761	27	3.89728	33	4.98496	chr00	9299621	9300034	-	414	-	GO:0000287;GO:0009055;GO:0009507;GO:0009522;GO:0009535;GO:0009536;GO:0009579;GO:0015979;GO:0016020;GO:0016021;GO:0016168;GO:0016491;GO:0018298;GO:0046872;GO:0051536;GO:0051539;GO:0055114	K02689	Photosystem I P700 chlorophyll a apoprotein A1
MELO3C000102.2	0	0	0	0	0	0	0	0	0	0	0	0	0	0	0	0	0	0	chr00	9296692	9296914	+	223	-	-	-	Unknown protein
MELO3C000103.2	238	33.0836	203	28.4592	251	30.4909	23	3.30114	20	2.95903	22	2.69843	162	24.1247	203	28.016	177	25.5643	chr00	9262031	9263450	-	433	-	-	K16075	Magnesium transporter MRS2-like protein
MELO3C000105.2	3	0.626978	1	0.210776	6	1.09583	0	0	0	0	0	0	3	0.67168	1	0.207494	0	0	chr00	9250644	9252134	+	288	-	GO:0004180;GO:0004185;GO:0006508;GO:0008233;GO:0016020;GO:0016021;GO:0016787	K16297	Carboxypeptidase
MELO3C000106.2	526	19.3638	502	18.638	674	21.6833	670	25.4672	537	21.0409	713	23.1605	479	18.8909	517	18.896	501	19.1632	chr00	9129705	9131339	+	1635	-	GO:0003723;GO:0003735;GO:0005622;GO:0005840;GO:0006412;GO:0009507;GO:0009536;GO:0015935;GO:0019843;GO:0030529	K02992	30S ribosomal protein S12, chloroplastic
MELO3C000108.2	65	2.63457	43	1.75775	68	2.40861	99	4.14316	75	3.23551	123	4.39901	150	6.51326	106	4.26558	116	4.88517	chr00	9071061	9072545	+	1485	-	GO:0003735;GO:0005622;GO:0005840;GO:0006412;GO:0009507;GO:0009536;GO:0019843;GO:0030529	K02878	50S ribosomal protein L16, chloroplastic
MELO3C000109.2	0	0	1	0.066488	3	0.172836	22	1.49753	4	0.280671	5	0.290854	1	0.0706258	2	0.130905	6	0.410988	chr00	9312838	9314038	+	913	-	-	-	GEM-like protein 4
MELO3C000111.2	23	0.950149	25	1.04158	26	0.938637	22	0.938397	24	1.05526	25	0.91129	47	2.08004	32	1.31247	29	1.24476	chr00	9410333	9411789	-	1457	-	GO:0003723;GO:0003735;GO:0005622;GO:0005840;GO:0006412;GO:0009507;GO:0009536;GO:0015934;GO:0016740;GO:0019843;GO:0030529	K02886	50S ribosomal protein L2, chloroplastic
MELO3C000113.2	847	59.3491	854	60.3502	781	47.8235	110	7.95835	45	3.35604	60	3.70966	181	13.5869	229	15.9309	329	23.9525	chr00	9468935	9469793	-	859	-	GO:0005506;GO:0016705;GO:0020037;GO:0055114	K07408	cytochrome P450 71A1-like
MELO3C000117.2	3445	221.06	2266	146.646	3820	214.212	2045	135.492	2064	140.966	2271	128.585	2577	177.152	3166	201.7	2789	185.949	chr00	9510338	9511929	+	938	-	GO:0003824;GO:0008483;GO:0009058;GO:0016740;GO:0030170	K14272	Alanine aminotransferase 2
MELO3C000121.2	0	0	0	0	0	0	0	0	0	0	0	0	0	0	0	0	0	0	chr00	9596762	9597184	+	423	-	GO:0016020;GO:0016021	-	Leguminosin group486 secreted peptide
MELO3C000123.2	0	0	545	27.9657	171	7.60318	0	0	0	0	1	0.0448943	18	0.981119	43	2.17211	0	0	chr00	9610097	9611279	+	1183	-	GO:0003676;GO:0008270	-	Zf-CCHC domain-containing protein
MELO3C000126.2	134	10.9436	165	13.5904	172	12.2757	937	79.0124	788	68.4962	1013	72.9992	195	17.0609	248	20.1086	245	20.7896	chr00	9642663	9644202	+	737	-	GO:0003756;GO:0005783;GO:0016853;GO:0045454	K09580	Protein disulfide-isomerase
MELO3C000129.2	0	0	0	0	0	0	0	0	0	0	0	0	0	0	1	0.280555	0	0	chr00	9637488	9637700	+	213	-	-	K16297	Unknown protein
MELO3C000130.2	103	9.85622	98	9.45779	66	5.51921	154	15.2158	114	11.6108	107	9.03461	115	11.7891	91	8.64548	48	4.77242	chr00	9407253	9407881	-	629	-	GO:0000287;GO:0004497;GO:0009507;GO:0009536;GO:0009853;GO:0015977;GO:0015979;GO:0016491;GO:0016829;GO:0016984;GO:0019253;GO:0046872;GO:0055114	K01601	Ribulose bisphosphate carboxylase large chain
MELO3C000131.2	19	1.10068	18	1.05165	12	0.607505	22	1.31592	16	0.986534	31	1.58461	32	1.98595	18	1.03527	6	0.361147	chr00	9564909	9565947	-	1039	-	GO:0009507;GO:0009521;GO:0009523;GO:0009535;GO:0009536;GO:0009579;GO:0009767;GO:0009772;GO:0015979;GO:0016020;GO:0016021;GO:0016168;GO:0018298;GO:0019684;GO:0045156;GO:0046872	K02705	Photosystem II CP43 reaction center protein
MELO3C000134.2	0	0	0	0	0	0	0	0	0	0	0	0	0	0	0	0	0	0	chr00	9716529	9718182	-	1320	-	GO:0004650;GO:0005975	K01213	exopolygalacturonase-like
MELO3C000137.2	0	0	0	0	0	0	0	0	0	0	0	0	0	0	0	0	0	0	chr00	9796144	9797056	+	645	-	GO:0000123;GO:0005634;GO:0016301;GO:0016310;GO:0016573	K08874	transformation/transcription domain-associated protein-like
MELO3C000138.2	0	0	0	0	0	0	0	0	0	0	0	0	0	0	0	0	0	0	chr00	19083755	19083890	-	136	-	-	-	Unknown protein
MELO3C000140.2	0	0	0	0	0	0	0	0	0	0	0	0	0	0	0	0	0	0	chr00	9847470	9848996	-	1303	-	GO:0016020;GO:0016021;GO:0055085	K02575	High-affinity nitrate transporter 2.2
MELO3C000141.2	5	0.560427	5	0.56521	15	1.46927	0	0	3	0.357894	1	0.0989013	0	0	4	0.445127	0	0	chr00	9858009	9858749	+	537	-	GO:0006508;GO:0008233;GO:0008234	-	Ulp1 protease family, carboxy-terminal domain protein
MELO3C000144.2	0	0	0	0	0	0	0	0	0	0	0	0	0	0	0	0	0	0	chr00	9839129	9839383	+	255	-	GO:0004553;GO:0005975	K01179	major extracellular endoglucanase-like
MELO3C000146.2	0	0	0	0	0	0	0	0	0	0	0	0	0	0	0	0	0	0	chr00	17373054	17373280	+	227	-	GO:0016020;GO:0016021	-	NBS-LRR type resistance protein
MELO3C000147.2	10	1.31995	11	1.46434	5	0.576752	617	84.0899	271	38.0726	306	35.6396	761	107.61	852	111.654	1347	184.736	chr00	9878131	9878586	+	456	-	GO:0000166;GO:0005524;GO:0016020;GO:0016021	-	Aaa-atpase
MELO3C000149.2	0	0	0	0	0	0	0	0	0	0	0	0	0	0	0	0	0	0	chr00	9916809	9917384	+	576	-	GO:0016020	-	Serine/threonine-protein phosphatase 7 long form-like protein
MELO3C000150.2	1	0.175994	1	0.177496	8	1.2304	0	0	0	0	0	0	1	0.188542	2	0.349464	0	0	chr00	9771080	9772119	-	342	-	GO:0005215;GO:0006810;GO:0016020	-	protein NRT1/ PTR FAMILY 4.3-like
MELO3C000152.2	4	0.193071	9	0.438117	9	0.37963	56	2.7909	45	2.31182	65	2.76836	7	0.361964	6	0.28753	6	0.300908	chr00	9965787	9967033	-	1247	-	-	-	At5g67020
MELO3C000153.2	0	0	0	0	0	0	0	0	0	0	0	0	0	0	0	0	0	0	chr00	9738627	9738896	+	270	-	-	-	Unknown protein
MELO3C000154.2	0	0	0	0	0	0	0	0	0	0	0	0	0	0	0	0	0	0	chr00	9924598	9924929	+	332	-	-	-	Unknown protein
MELO3C000155.2	0	0	0	0	0	0	1	0.198554	0	0	0	0	0	0	1	0.190921	0	0	chr00	10004532	10004944	-	313	-	GO:0016020;GO:0016021	-	Transmembrane protein, putative
MELO3C000157.2	104	35.1671	285	97.1939	272	80.3772	19	6.63372	36	12.9566	49	14.6202	51	18.475	29	9.7359	13	4.56743	chr00	9947248	9947425	+	178	-	GO:0006950	-	Universal stress protein A-like protein
MELO3C000161.2	6	0.475809	3	0.239935	3	0.207904	0	0	3	0.253214	1	0.0699736	7	0.594689	10	0.787329	3	0.247188	chr00	10018058	10019405	-	759	-	GO:0008168;GO:0016740;GO:0032259	-	Histone-lysine N-methyltransferase SETD1B-like protein
MELO3C000166.2	1441	37.547	1545	40.6004	1880	42.8085	5223	140.518	5138	142.492	6081	139.81	1345	37.5443	1531	39.606	1439	38.958	chr00	10074439	10081327	-	2310	-	GO:0003676;GO:0004386;GO:0005524	K12854	DExH-box ATP-dependent RNA helicase DExH12-like
MELO3C000169.2	408	54.5722	451	60.8385	457	53.418	337	46.5415	333	47.4067	408	48.153	349	50.0088	607	80.6073	459	63.7894	chr00	10172612	10173247	+	450	-	GO:0005516;GO:0006952;GO:0009607;GO:0016020;GO:0016021	K08472	MLO-like protein
MELO3C000171.2	0	0	0	0	0	0	0	0	0	0	0	0	0	0	0	0	0	0	chr00	10177813	10177966	+	154	-	-	-	Unknown protein
MELO3C000173.2	42	4.43505	51	5.43137	35	3.22981	37	4.03413	47	5.28239	35	3.26114	59	6.67438	35	3.66937	25	2.74292	chr00	9949931	9950500	+	570	-	GO:0009507;GO:0009521;GO:0009523;GO:0009535;GO:0009536;GO:0009579;GO:0009767;GO:0009772;GO:0015979;GO:0016020;GO:0016021;GO:0016168;GO:0018298;GO:0019684;GO:0045156;GO:0046872	K02705	Photosystem II CP43 reaction center protein
MELO3C000175.2	0	0	0	0	1	0.0807984	0	0	0	0	0	0	0	0	0	0	0	0	chr00	10311504	10312239	+	651	-	-	-	Serine/threonine protein phosphatase 7 long form isogeny
MELO3C000178.2	0	0	0	0	0	0	0	0	0	0	0	0	0	0	0	0	0	0	chr00	10412487	10412876	-	390	-	-	-	Unknown protein
MELO3C000179.2	53	5.74786	74	8.09381	88	8.34015	106	11.8696	84	9.69603	111	10.622	70	8.13278	38	4.09156	52	5.85947	chr00	10072069	10072623	+	555	-	GO:0005886;GO:0009507;GO:0009535;GO:0009536;GO:0009579;GO:0016020;GO:0016021;GO:0016491;GO:0016655;GO:0019684;GO:0048038;GO:0055114	K05572	NAD(P)H-quinone oxidoreductase subunit 1, chloroplastic
MELO3C000180.2	19	5.86466	28	8.71641	27	7.28305	39	12.4295	17	5.58499	22	5.9919	21	6.94414	22	6.74196	20	6.41422	chr00	10072645	10072839	+	195	-	GO:0005506;GO:0008137;GO:0009507;GO:0009535;GO:0009536;GO:0009579;GO:0016020;GO:0016491;GO:0016651;GO:0016655;GO:0019684;GO:0046872;GO:0048038;GO:0051536;GO:0051539;GO:0055114	K05580	NAD(P)H-quinone oxidoreductase subunit I, chloroplastic
MELO3C000189.2	12	3.15406	7	1.85557	11	2.52663	6	1.62832	15	4.19627	5	1.15961	19	5.34998	32	8.3505	7	1.91166	chr00	10474577	10474805	-	229	-	GO:0000166;GO:0006812;GO:0016020;GO:0016021;GO:0016787;GO:0019829;GO:0030001;GO:0046872	K01534	Cadmium/zinc-transporting ATPase 3-like protein
MELO3C000192.2	1	0.159233	5	0.802957	0	0	0	0	0	0	0	0	0	0	0	0	0	0	chr00	10535606	10535983	+	378	-	GO:0005515;GO:0005634;GO:0010089;GO:0010311;GO:0045893	-	LOB domain-containing protein 18
MELO3C000193.2	0	0	0	0	0	0	0	0	0	0	0	0	0	0	0	0	0	0	chr00	10562625	10562904	-	280	-	GO:0004857;GO:0043086;GO:0046910	-	pectinesterase inhibitor-like
MELO3C000196.2	146	6.61726	132	6.03379	186	7.36714	192	8.98518	187	9.02093	214	8.55839	169	8.20583	154	6.9298	160	7.53477	chr00	10590318	10591645	-	1328	-	GO:0000166;GO:0005524;GO:0006754;GO:0006810;GO:0006811;GO:0009507;GO:0009535;GO:0009536;GO:0009579;GO:0015986;GO:0015992;GO:0016020;GO:0016787;GO:0032559;GO:0045261;GO:0046034;GO:0046933	K02111	ATP synthase subunit alpha, chloroplastic
MELO3C000198.2	0	0	0	0	0	0	0	0	0	0	0	0	0	0	0	0	0	0	chr00	10646647	10647139	-	375	-	GO:0016020;GO:0016798	K07964	heparanase-like protein 2
MELO3C000199.2	64	12.1137	71	13.5533	78	12.9018	228	44.5586	242	48.7524	292	48.7677	82	16.6273	105	19.7315	94	18.4863	chr00	10635983	10637069	+	318	-	GO:0003756;GO:0005783;GO:0016853;GO:0045454	K09580	Protein disulfide-isomerase
MELO3C000200.2	0	0	0	0	0	0	0	0	0	0	0	0	0	0	0	0	0	0	chr00	10680046	10682566	+	663	-	GO:0006810;GO:0008643;GO:0016020;GO:0016021	K15382	Bidirectional sugar transporter SWEET
MELO3C000201.2	19	1.54542	17	1.39454	28	1.99026	13	1.09178	8	0.692574	8	0.574162	5	0.435685	21	1.69584	9	0.760605	chr00	10667740	10668479	+	740	-	GO:0003677;GO:0005634;GO:0006355	-	dof zinc finger protein DOF1.5-like
MELO3C000203.2	0	0	0	0	0	0	0	0	0	0	0	0	0	0	0	0	0	0	chr00	10720115	10721550	-	835	-	GO:0008168;GO:0016740;GO:0032259	K08241	salicylate carboxymethyltransferase-like
MELO3C000204.2	0	0	3	0.231693	0	0	0	0	0	0	0	0	0	0	0	0	0	0	chr00	10701948	10702861	+	786	-	GO:0008168;GO:0016740;GO:0032259	K08241	salicylate carboxymethyltransferase-like
MELO3C000210.2	2	0.729575	1	0.3679	2	0.637573	0	0	0	0	0	0	0	0	2	0.724343	1	0.379022	chr00	10847371	10847535	-	165	-	-	-	Unknown protein
MELO3C000213.2	6	1.56337	9	2.36507	8	1.82164	18	4.84266	24	6.6559	22	5.05809	9	2.51226	8	2.06955	7	1.89511	chr00	10851741	10852890	-	231	-	GO:0005092;GO:0005968;GO:0006886;GO:0007264;GO:0016491;GO:0016740;GO:0018344;GO:0050790;GO:0055114	-	Rab proteins geranylgeranyltransferase component A
MELO3C000215.2	0	0	0	0	0	0	0	0	0	0	0	0	0	0	0	0	0	0	chr00	10933946	10934170	-	225	-	GO:0005741;GO:0008308;GO:0055085;GO:0098656;GO:1903959	K15040	Mitochondrial outer membrane protein porin
MELO3C000217.2	1746	89.6686	1563	80.9554	2204	98.9163	1501	79.5933	1384	75.6513	1824	82.6558	1332	73.2842	1471	75.0038	1417	75.612	chr00	10947948	10949159	+	1172	-	GO:0003676	K14398	RNA-binding protein, putative
MELO3C000220.2	0	0	2	0.0966617	1	0.0418788	0	0	4	0.204023	0	0	5	0.256693	1	0.0475783	6	0.298751	chr00	10900352	10901607	-	1256	-	GO:0008152;GO:0016740;GO:0016757;GO:0016758	-	Glycosyltransferase
MELO3C000225.2	0	0	1	0.0975942	1	0.0845656	7	0.699409	0	0	0	0	2	0.207335	1	0.0960744	3	0.301633	chr00	11046254	11046875	+	622	-	GO:0043531	-	disease resistance protein RGA2-like
MELO3C000228.2	257	13.8609	203	11.042	318	14.9881	154	8.5759	163	9.35688	140	6.66254	370	21.3782	740	39.6247	445	24.937	chr00	11077967	11079082	+	1116	-	GO:0003676;GO:0008270	-	UBN2_3 domain-containing protein
MELO3C000230.2	0	0	0	0	0	0	0	0	0	0	0	0	0	0	0	0	0	0	chr00	11206989	11209317	+	720	-	GO:0016788	-	GDSL esterase/lipase At5g03980-like
MELO3C000231.2	0	0	0	0	0	0	0	0	0	0	0	0	0	0	0	0	0	0	chr00	11100670	11101647	+	978	-	GO:0004553;GO:0005975;GO:0030246	-	beta-galactosidase-like
MELO3C000234.2	0	0	0	0	0	0	0	0	0	0	0	0	0	0	0	0	0	0	chr00	11048850	11048999	-	150	-	-	-	Unknown protein
MELO3C000236.2	0	0	0	0	0	0	0	0	0	0	0	0	0	0	0	0	0	0	chr03	2558912	2559096	+	185	-	-	-	Unknown protein
MELO3C000237.2	167	27.2404	146	24.0182	215	30.6476	78	13.1369	66	11.4584	74	10.6508	112	19.5716	154	24.9398	145	24.5748	chr00	11319459	11320331	-	369	-	GO:0016020;GO:0016021	-	Major facilitator superfamily domain-containing protein 12
MELO3C000238.2	6	0.406231	2	0.136566	6	0.355004	0	0	0	0	5	0.298706	3	0.217597	3	0.201659	5	0.351736	chr00	11334325	11335213	-	889	-	GO:0003743;GO:0005669;GO:0006352;GO:0006413;GO:0046982	K03126	transcription initiation factor TFIID subunit 12
MELO3C000240.2	0	0	0	0	0	0	0	0	0	0	0	0	0	0	0	0	0	0	chr00	11367119	11367333	-	215	-	GO:0009626;GO:0016020;GO:0016021	-	Protein LAZ1
MELO3C000241.2	1	0.0944896	1	0.095296	4	0.330297	8	0.780502	4	0.40228	13	1.08388	11	1.11349	7	0.656685	10	0.981768	chr00	10887781	10888417	+	637	-	GO:0003723;GO:0003735;GO:0005840;GO:0006412;GO:0009507;GO:0009536;GO:0015934;GO:0019843;GO:0030529	K02874	50S ribosomal protein L14, chloroplastic
MELO3C000242.2	0	0	0	0	0	0	0	0	0	0	0	0	0	0	0	0	0	0	chr00	11390885	11391052	-	168	-	GO:0003676;GO:0004386;GO:0005524	K11594	DEAD-box ATP-dependent RNA helicase-like protein
MELO3C000243.2	0	0	0	0	0	0	0	0	0	0	0	0	0	0	0	0	0	0	chr00	31411010	31411166	+	157	-	-	-	Unknown protein
MELO3C000247.2	0	0	0	0	0	0	0	0	0	0	0	0	0	0	0	0	1	0.169023	chr00	11441822	11442191	-	370	-	GO:0003677;GO:0005634;GO:0006351;GO:0006355	-	NAC domain-containing protein, putative
MELO3C000249.2	509	69.9467	486	67.356	581	69.7728	255	36.1817	338	49.4368	436	52.8675	310	45.6375	439	59.8947	427	60.968	chr00	11464554	11464991	+	438	-	GO:0005634;GO:0006886;GO:0006913;GO:0008536;GO:0008565	K14293	Importin subunit beta-1
MELO3C000251.2	251	40.612	268	43.7327	260	36.7633	157	26.2289	173	29.7928	180	25.6984	296	51.3077	260	41.7665	298	50.0981	chr00	11458525	11458977	-	372	-	GO:0016020;GO:0016021	-	Protein LAZ1
MELO3C000253.2	286	25.278	323	28.7919	353	27.2654	142	12.9588	142	13.3582	202	15.7536	280	26.5121	282	24.7457	284	26.0807	chr00	11583316	11588546	+	681	-	GO:0003743;GO:0005737;GO:0005840;GO:0006413;GO:0016020;GO:0016021;GO:0030529	-	Translation machinery-associated protein 22
MELO3C000254.2	428	24.1437	367	20.8793	426	21.0005	70	4.07715	123	7.38497	141	7.01828	321	19.3988	362	20.2741	295	17.2904	chr00	11519051	11520329	+	1067	-	GO:0003677;GO:0005634;GO:0006351;GO:0006355;GO:0009725;GO:0009734	K14486	Auxin response factor
MELO3C000256.2	74	13.4564	57	10.4535	72	11.4416	34	6.38373	29	5.61278	48	7.70175	61	11.8833	61	11.0129	61	11.5252	chr00	11593086	11594240	-	331	-	GO:0000139;GO:0005198;GO:0005737;GO:0005794;GO:0006810;GO:0006886;GO:0015031;GO:0016020;GO:0016192;GO:0030117;GO:0030663;GO:0031410	K03030	Coatomer subunit beta'
MELO3C000258.2	264	48.4455	313	57.9275	269	43.1382	275	52.1053	262	51.1723	317	51.3289	167	32.8304	173	31.5189	166	31.6506	chr00	11602352	11602679	-	328	-	GO:0003824;GO:0005975;GO:0006108;GO:0016491;GO:0016615;GO:0016616;GO:0030060;GO:0055114	K00026	malate dehydrogenase, chloroplastic-like
MELO3C000260.2	571	83.6215	737	108.853	624	79.8595	465	70.3128	385	60.0104	524	67.712	374	58.6764	606	88.1108	495	75.3202	chr00	11557902	11558461	-	411	-	GO:0000165;GO:0000977;GO:0003677;GO:0003700;GO:0005634;GO:0006351;GO:0006355;GO:0045944;GO:0046983	K09264	MADS box transcription factor AGAMOUS
MELO3C000262.2	77	9.77768	59	7.55593	97	10.7641	51	6.68675	14	1.89216	26	2.91321	67	9.11445	92	11.5987	139	18.3394	chr00	11701680	11705450	+	474	-	-	-	MACPF domain-containing protein
MELO3C000268.2	0	0	0	0	0	0	0	0	0	0	0	0	0	0	0	0	0	0	chr00	11765299	11766434	-	782	-	GO:0006633;GO:0016491;GO:0016702;GO:0031408;GO:0046872;GO:0051213;GO:0055114	K15718	Lipoxygenase
MELO3C000273.2	15	4.29928	18	5.20316	27	6.76283	2	0.591881	5	1.52531	18	4.55228	13	3.9917	20	5.69127	13	3.87144	chr00	11758737	11759044	+	210	-	GO:0006457;GO:0016272;GO:0051082	K04797	Prefoldin subunit 5
MELO3C000277.2	54	3.42493	69	4.41364	85	4.71126	135	8.84079	72	4.86042	111	6.21202	54	3.66912	49	3.08552	35	2.30648	chr00	11644849	11645797	+	949	-	GO:0005506;GO:0009055;GO:0009507;GO:0009535;GO:0009536;GO:0009579;GO:0015979;GO:0016020;GO:0016021;GO:0016491;GO:0020037;GO:0022900;GO:0022904;GO:0045158;GO:0046872;GO:0055114	K02635	Cytochrome b6
MELO3C000279.2	231	17.4234	384	29.2107	445	29.332	3705	288.542	3679	295.348	4867	323.918	256	20.6857	312	23.3641	223	17.4763	chr00	11935783	11936893	+	798	-	GO:0019031	-	Late cornified envelope protein 1E
MELO3C000282.2	0	0	0	0	0	0	0	0	0	0	0	0	0	0	0	0	0	0	chr04	11981950	11982172	+	223	-	GO:0009058	-	Anthranilate synthase component I-2
MELO3C000284.2	0	0	1	0.0557425	1	0.048301	0	0	0	0	0	0	0	0	1	0.0548745	1	0.0574276	chr10	3973645	3976730	-	1089	-	GO:0003824;GO:0008483;GO:0009058;GO:0016740;GO:0030170	K14272	Alanine aminotransferase 2
MELO3C000289.2	0	0	0	0	0	0	0	0	0	0	0	0	0	0	0	0	0	0	chr00	12112974	12113171	-	198	-	-	-	Unknown protein
MELO3C000290.2	0	0	0	0	0	0	0	0	0	0	0	0	0	0	0	0	0	0	chr00	12072959	12073196	+	238	-	-	-	Unknown protein
MELO3C000294.2	6	2.22926	7	2.62299	1	0.32469	5	1.91813	5	1.97726	7	2.29488	1	0.398033	3	1.10664	1	0.386041	chr00	12166273	12166434	+	162	-	-	-	Unknown protein
MELO3C000295.2	0	0	0	0	0	0	0	0	0	0	0	0	0	0	0	0	0	0	chr00	12147258	12148371	+	1114	-	-	-	girdin-like
MELO3C000296.2	1	0.343942	0	0	1	0.30057	4	1.42051	0	0	0	0	0	0	0	0	0	0	chr00	12161356	12161530	+	175	-	GO:0006457;GO:0051082	K09510	DnaJ like protein
MELO3C000298.2	24	2.23616	5	0.469842	12	0.977086	0	0	3	0.297507	9	0.739922	15	1.49724	28	2.59014	10	0.96809	chr00	12335222	12336033	+	646	-	GO:0005768;GO:0005794;GO:0005802;GO:0009827;GO:0016020;GO:0016021;GO:0016413;GO:0030244;GO:0045489	-	Protein trichome birefringence
MELO3C000302.2	0	0	0	0	0	0	0	0	0	0	0	0	0	0	0	0	0	0	chr00	12294691	12297157	-	471	-	-	K00547	Unknown protein
MELO3C000306.2	0	0	0	0	0	0	0	0	0	0	0	0	0	0	0	0	0	0	chr00	12352189	12352604	-	416	-	GO:0016020;GO:0016021	-	Peripheral-type benzodiazepine receptor-associated protein 1
MELO3C000307.2	1	0.0759973	0	0	0	0	44	3.45264	23	1.86042	27	1.81057	0	0	0	0	0	0	chr00	12316489	12317280	-	792	-	GO:0003677;GO:0003680;GO:0003700;GO:0005634;GO:0006351;GO:0006355;GO:0009640;GO:0009647;GO:0009908;GO:0010228;GO:0042826;GO:0043621	-	AT-hook motif nuclear-localized protein 22
MELO3C000309.2	0	0	0	0	0	0	0	0	0	0	0	0	0	0	0	0	0	0	chr00	12309613	12310083	+	471	-	-	-	Unknown protein
MELO3C000311.2	0	0	0	0	0	0	0	0	0	0	1	0.0646107	0	0	0	0	0	0	chr00	12379398	12380303	+	822	-	GO:0000160;GO:0005622	K14492	two-component response regulator ARR16-like
MELO3C000313.2	0	0	0	0	0	0	0	0	0	0	0	0	0	0	0	0	0	0	chr00	12436069	12436946	-	816	-	GO:0030246	-	Amaranthin-like lectin
MELO3C000317.2	0	0	1	0.0831556	0	0	0	0	0	0	0	0	0	0	2	0.163721	0	0	chr00	12468029	12468758	+	730	-	GO:0008152;GO:0008168;GO:0016740;GO:0032259	-	Methyltransferase
MELO3C000319.2	0	0	0	0	1	0.276841	0	0	0	0	0	0	0	0	0	0	0	0	chr00	12448791	12448980	+	190	-	-	-	Unknown protein
MELO3C000321.2	10	0.8997	7	0.635164	31	2.43736	8	0.743168	6	0.574557	7	0.55571	13	1.253	17	1.51852	12	1.12177	chr00	1362174	1362842	+	669	-	GO:0043531	-	LOW QUALITY PROTEIN: disease resistance protein RGA2-like
MELO3C000323.2	0	0	0	0	0	0	0	0	0	0	0	0	0	0	0	0	0	0	chr00	12462825	12463168	-	344	-	-	-	protein MNN4-like
MELO3C000324.2	0	0	0	0	0	0	0	0	0	0	0	0	0	0	0	0	0	0	chr00	12458116	12458370	-	255	-	GO:0004553;GO:0005975	K01179	major extracellular endoglucanase-like
MELO3C000325.2	0	0	0	0	0	0	0	0	0	0	0	0	0	0	0	0	0	0	chr00	12512296	12512813	+	234	-	GO:0008171;GO:0016020;GO:0016021;GO:0032259	K09528	DnaJ-like protein
MELO3C000329.2	0	0	0	0	0	0	0	0	0	0	0	0	0	0	0	0	0	0	chr00	12452813	12453410	-	598	-	GO:0005576;GO:0005622;GO:0007338;GO:0009567;GO:0031410;GO:0031982;GO:0048240;GO:0080155;GO:2000008	-	Egg cell-secreted protein 1.1
MELO3C000330.2	7	0.789006	6	0.682063	16	1.57602	4	0.465524	7	0.839778	12	1.19348	14	1.69052	2	0.223814	6	0.702681	chr00	12365020	12365553	+	534	-	GO:0003677;GO:0003899;GO:0006351;GO:0009507;GO:0009536;GO:0016740;GO:0016779	K03046	DNA-directed RNA polymerase subunit beta''
MELO3C000332.2	4	0.295049	2	0.148783	12	0.773526	9	0.68545	0	0	4	0.260343	5	0.395106	4	0.292933	14	1.07297	chr00	12595805	12596755	-	816	-	GO:0003677;GO:0003899;GO:0006351;GO:0009507;GO:0009536;GO:0016740;GO:0016779;GO:0032549	K03043	DNA-directed RNA polymerase subunit beta
MELO3C000333.2	118	16.0688	148	20.3261	128	15.2325	78	10.9672	84	12.1749	77	9.25219	127	18.5274	123	16.6296	125	17.6863	chr00	12553822	12554809	+	442	-	GO:0005524;GO:0016301;GO:0016307;GO:0016308;GO:0016310;GO:0016740;GO:0046488;GO:0046854	K00889	Phosphatidylinositol-4-phosphate 5-kinase, putative
MELO3C000334.2	6	0.61945	9	0.937105	13	1.17289	15	1.59899	13	1.42851	16	1.45756	13	1.43783	8	0.820011	12	1.28724	chr00	12075225	12075807	-	583	-	GO:0000166;GO:0003989;GO:0005524;GO:0006629;GO:0006631;GO:0006633;GO:0008270;GO:0009317;GO:0009507;GO:0009536;GO:0009570;GO:0016740;GO:0016874;GO:0046872;GO:2001295	K01963	Acetyl-coenzyme A carboxylase carboxyl transferase subunit beta, chloroplastic
MELO3C000335.2	0	0	0	0	0	0	0	0	0	0	0	0	0	0	0	0	0	0	chr00	12667440	12668519	-	732	-	GO:0006952;GO:0007165;GO:0043531	-	MRGH13
MELO3C000336.2	15	1.09436	16	1.17728	9	0.573816	9	0.677972	16	1.24244	15	0.965636	13	1.01607	10	0.724343	2	0.151609	chr00	19465964	19472990	-	825	-	GO:0003677	-	Transcription factor
MELO3C000339.2	0	0	0	0	0	0	0	0	0	0	0	0	0	0	0	0	0	0	chr00	12598192	12598699	-	508	-	-	-	serine/threonine-protein phosphatase 7 long form homolog
MELO3C000340.2	0	0	0	0	0	0	0	0	0	0	0	0	0	0	0	0	0	0	chr00	12663157	12663404	-	248	-	GO:0004553;GO:0005975	K01179	endoglucanase-like
MELO3C000341.2	28	2.13331	13	0.99892	36	2.39695	16	1.25868	38	3.08152	47	3.15971	16	1.30595	22	1.66416	7	0.55414	chr00	12728874	12736142	+	790	-	GO:0006855;GO:0015238;GO:0015297;GO:0016020;GO:0016021;GO:0055085	K03327	Protein DETOXIFICATION
MELO3C000342.2	0	0	0	0	0	0	0	0	0	0	0	0	0	0	0	0	0	0	chr00	12748114	12748334	+	221	-	GO:0004180;GO:0006508	-	carboxypeptidase Y-like
MELO3C000347.2	1908	92.2428	2113	103.025	2237	94.5106	7689	383.817	6391	328.857	7862	335.382	2867	148.488	2434	116.829	3265	164.007	chr00	12400350	12405186	-	1245	-	GO:0015031;GO:0016020	K10956	protein transport protein Sec61 subunit alpha-like
MELO3C000349.2	0	0	0	0	0	0	0	0	0	0	0	0	0	0	0	0	0	0	chr00	12754632	12754863	-	232	-	-	-	Unknown protein
MELO3C000350.2	0	0	0	0	0	0	0	0	0	0	0	0	0	0	0	0	0	0	chr00	12789564	12789967	+	404	-	-	-	Unknown protein
MELO3C000351.2	0	0	0	0	0	0	0	0	0	0	0	0	0	0	0	0	0	0	chr00	12947330	12948313	+	332	-	GO:0003735;GO:0005622;GO:0005840;GO:0006412	K02953	40S ribosomal protein S13-like
MELO3C000356.2	0	0	0	0	0	0	0	0	0	0	0	0	0	0	3	0.538363	0	0	chr00	12881123	12881557	+	333	-	GO:0005783;GO:0006629;GO:0010025;GO:0016491;GO:0055114;GO:0080019	K13356	Fatty acyl-CoA reductase
MELO3C000358.2	0	0	0	0	0	0	0	0	0	0	0	0	0	0	0	0	0	0	chr00	13000654	13000881	-	228	-	GO:0000062	-	acyl-CoA-binding domain-containing protein 4
MELO3C000359.2	0	0	1	0.204389	0	0	2	0.418501	1	0.215701	0	0	0	0	1	0.201206	0	0	chr00	13029963	13030259	+	297	-	GO:0016874	-	RNA ligase, putative
MELO3C000362.2	2	0.461225	0	0	1	0.201532	0	0	2	0.490905	0	0	0	0	0	0	0	0	chr00	13023382	13023642	+	261	-	GO:0004180;GO:0004185;GO:0006508	-	serine carboxypeptidase-like 25 isoform X3
MELO3C000364.2	0	0	0	0	0	0	0	0	1	0.197726	0	0	0	0	0	0	0	0	chr00	13037805	13038128	-	324	-	-	-	Unknown protein
MELO3C000366.2	0	0	0	0	0	0	0	0	0	0	0	0	0	0	0	0	0	0	chr00	13065134	13065514	+	381	-	-	-	extensin-3-like
MELO3C000367.2	0	0	0	0	0	0	0	0	0	0	0	0	0	0	0	0	0	0	chr00	13268614	13269306	-	693	-	-	-	Unknown protein
MELO3C000370.2	0	0	0	0	0	0	0	0	0	0	0	0	0	0	0	0	0	0	chr00	13072308	13072557	-	250	-	-	-	Unknown protein
MELO3C000371.2	0	0	0	0	0	0	0	0	0	0	0	0	0	0	0	0	0	0	chr02	22850890	22852629	+	157	-	-	-	Unknown protein
MELO3C000372.2	186	16.9883	203	18.6993	221	17.6397	745	70.2578	382	37.1352	464	37.3946	531	51.9569	255	23.1235	477	45.267	chr00	13110119	13110871	-	659	-	GO:0000166;GO:0000287;GO:0004012;GO:0005524;GO:0015914;GO:0016020;GO:0016021;GO:0016787;GO:0045332;GO:0046872	K01530	Phospholipid-transporting ATPase
MELO3C000374.2	0	0	0	0	0	0	0	0	0	0	0	0	0	0	0	0	0	0	chr00	13126068	13126983	-	563	-	GO:0000139;GO:0005198;GO:0005737;GO:0005794;GO:0006810;GO:0006886;GO:0015031;GO:0016020;GO:0016192;GO:0030117;GO:0030663;GO:0031410	K17302	Coatomer subunit beta'
MELO3C000376.2	186	31.5361	194	33.1732	261	38.672	5	0.875316	9	1.62413	10	1.49606	115	20.8883	176	29.6266	136	23.9585	chr00	13169331	13170031	-	355	-	GO:0005634;GO:0016925;GO:0031386	K09528	Small ubiquitin-related modifier
MELO3C000377.2	0	0	0	0	0	0	0	0	0	0	0	0	0	0	0	0	0	0	chr00	13058768	13058959	+	192	-	-	-	Unknown protein
MELO3C000378.2	4	0.321013	14	1.13313	11	0.771463	7	0.580043	1	0.0854174	4	0.283253	57	4.90058	25	1.99194	23	1.91785	chr00	13239460	13240468	-	750	-	GO:0004601;GO:0005509;GO:0016020;GO:0016021;GO:0016174;GO:0016491;GO:0050664;GO:0055114	K13447	Respiratory burst oxidase, putative
MELO3C000379.2	0	0	0	0	0	0	0	0	0	0	0	0	0	0	0	0	0	0	chr07	19814813	19817164	-	501	-	-	-	Unknown protein
MELO3C000382.2	0	0	0	0	0	0	0	0	0	0	0	0	0	0	0	0	0	0	chr00	13180657	13181371	+	238	-	GO:0000166;GO:0003774;GO:0003777;GO:0005524;GO:0005874;GO:0007018;GO:0008017	K11498	Kinesin-like protein
MELO3C000387.2	0	0	0	0	0	0	0	0	0	0	0	0	0	0	0	0	0	0	chr11	27140937	27162631	-	519	-	GO:0004857;GO:0043086;GO:0046910	-	pectinesterase inhibitor-like
MELO3C000388.2	168	20.8924	127	15.9284	197	21.4094	197	25.2956	192	25.4135	196	21.5073	134	17.8523	146	18.0263	107	13.8257	chr00	13333655	13334689	-	484	-	GO:0031929;GO:0031931	K07204	Regulatory-associated of TOR 1-like protein
MELO3C000389.2	0	0	0	0	0	0	0	0	0	0	0	0	0	0	0	0	0	0	chr00	13442951	13443330	+	380	-	-	-	Unknown protein
MELO3C000391.2	57	3.6305	145	9.3143	123	6.84632	4	0.263058	9	0.610125	5	0.281005	233	15.8986	33	2.0868	44	2.91185	chr00	13410405	13411349	+	945	-	GO:0003676	-	zinc finger protein ZAT5-like
MELO3C000392.2	0	0	0	0	1	0.145303	0	0	0	0	0	0	14	2.49375	26	4.29203	29	5.01	chr00	13440106	13440467	-	362	-	GO:0016020;GO:0016760;GO:0030244	K00770	cellulose synthase-like protein D5
MELO3C000393.2	0	0	0	0	0	0	0	0	0	0	1	0.162914	0	0	0	0	0	0	chr00	9038707	9039032	-	326	-	GO:0016491;GO:0055114	-	ferric reduction oxidase 7, chloroplastic
MELO3C000395.2	0	0	0	0	0	0	0	0	0	0	0	0	0	0	0	0	0	0	chr00	13465781	13465954	+	174	-	-	-	Unknown protein
MELO3C000397.2	428	14.3357	442	14.931	487	14.2549	135	4.66884	129	4.59885	133	3.93079	389	13.9584	455	15.1308	379	13.1898	chr00	13534469	13543835	-	1797	-	GO:0008270;GO:0016020;GO:0016021	K14786	Protein KRI1
MELO3C000398.2	21	4.49818	9	1.94424	30	5.61563	265	58.6088	189	43.0887	190	35.9107	45	10.3262	57	12.1218	53	11.7955	chr00	13399371	13399651	+	281	-	GO:0003677;GO:0005634;GO:0006355	-	Dof zinc finger protein DOF2.1
MELO3C000399.2	48	6.53646	41	5.63087	46	5.47419	78	10.9672	50	7.24696	62	7.44982	54	7.87781	37	5.00239	37	5.23513	chr00	13244301	13244742	+	442	-	GO:0009055;GO:0009507;GO:0009535;GO:0009536;GO:0009579;GO:0009767;GO:0015979;GO:0016020;GO:0016021;GO:0016491;GO:0042651;GO:0045156;GO:0045158;GO:0055114	K02637	Cytochrome b6-f complex subunit 4
MELO3C000402.2	0	0	0	0	0	0	0	0	0	0	0	0	0	0	0	0	0	0	chr00	13532691	13532881	+	191	-	-	-	Unknown protein
MELO3C000403.2	0	0	0	0	0	0	0	0	0	0	0	0	0	0	0	0	0	0	chr00	13554974	13556009	+	1008	-	GO:0003676	K18577	DUF4283 domain protein
MELO3C000406.2	0	0	0	0	0	0	0	0	0	0	0	0	0	0	0	0	0	0	chr00	13541651	13542622	+	972	-	GO:0003676	K18577	DUF4283 domain protein
MELO3C000407.2	0	0	0	0	0	0	0	0	0	0	0	0	0	0	0	0	0	0	chr00	13561818	13561973	-	156	-	-	-	Unknown protein
MELO3C000409.2	0	0	0	0	0	0	0	0	0	0	0	0	0	0	0	0	0	0	chr00	13587642	13588524	+	883	-	GO:0016020;GO:0016021	-	Carbohydrate esterase plant-like protein
MELO3C000410.2	0	0	0	0	0	0	0	0	0	0	0	0	0	0	0	0	0	0	chr00	13689519	13690573	-	856	-	GO:0016491;GO:0046872;GO:0051213;GO:0055114	-	2-oxoglutarate-dependent dioxygenase
MELO3C000411.2	0	0	0	0	0	0	0	0	0	0	0	0	0	0	0	0	0	0	chr00	13683682	13683850	-	169	-	-	-	Unknown protein
MELO3C000413.2	259	27.3015	247	26.2588	233	21.4637	323	35.1552	316	35.4535	352	32.7403	146	16.4873	176	18.4194	163	17.8525	chr00	13720010	13720853	-	571	-	GO:0008901;GO:0016491;GO:0055114	-	Cytosolic Fe-S cluster assembly factor NARFL
MELO3C000414.2	0	0	0	0	0	0	0	0	0	0	0	0	0	0	0	0	0	0	chr00	13730344	13730495	-	152	-	-	-	Unknown protein
MELO3C000415.2	0	0	0	0	0	0	0	0	0	0	0	0	0	0	0	0	0	0	chr00	13685482	13685748	+	267	-	-	-	Unknown protein
MELO3C000416.2	0	0	0	0	0	0	0	0	0	0	0	0	0	0	0	0	0	0	chr00	13640879	13641135	-	257	-	GO:0000398;GO:0019013;GO:0030529;GO:0046540	K12843	U4/U6 small nuclear ribonucleoprotein Prp3, putative
MELO3C000421.2	0	0	0	0	0	0	0	0	0	0	0	0	0	0	0	0	0	0	chr00	13623782	13623967	-	186	-	-	-	Unknown protein
MELO3C000423.2	0	0	0	0	0	0	0	0	0	0	0	0	0	0	0	0	0	0	chr03	13666489	13667021	-	533	-	GO:0000166;GO:0005524;GO:0005739;GO:0006754;GO:0006810;GO:0006811;GO:0015986;GO:0015992;GO:0032559;GO:0045261;GO:0046034;GO:0046933	K02132	ATP synthase subunit alpha
MELO3C000424.2	227	15.5086	207	14.2629	247	14.747	47	3.31547	45	3.27223	56	3.37589	136	9.95398	186	12.6164	177	12.5645	chr00	13811140	13812257	-	881	-	GO:0005622;GO:0006606	K09291	Nuclear-pore anchor
MELO3C000425.2	0	0	0	0	0	0	4	1.08083	0	0	0	0	0	0	0	0	2	0.543814	chr00	13833485	13833714	+	230	-	GO:0000166;GO:0003676;GO:0004813;GO:0005524;GO:0005737;GO:0006419;GO:0016874	K01872	alanine--tRNA ligase-like
MELO3C000428.2	198	18.2226	258	23.9473	289	23.2436	394	37.4405	252	24.6849	317	25.7429	248	24.4516	160	14.6198	148	14.1525	chr00	19583067	19583720	+	654	-	GO:0005506;GO:0009055;GO:0009507;GO:0009523;GO:0009535;GO:0009536;GO:0009579;GO:0009635;GO:0009772;GO:0015979;GO:0016020;GO:0016021;GO:0016168;GO:0016491;GO:0016682;GO:0018298;GO:0019684;GO:0045156;GO:0046872;GO:0055114	K02703	Photosystem II protein D1
MELO3C000439.2	11	1.73777	18	2.86789	11	1.51863	4	0.652467	30	5.04434	20	2.78793	20	3.38485	17	2.66638	15	2.46215	chr00	13807091	13807735	-	381	-	GO:0006955;GO:0008219;GO:0009626;GO:0010337;GO:0052542	-	MACPF domain-containing protein NSL1
MELO3C000443.2	0	0	0	0	0	0	0	0	0	0	0	0	0	0	0	0	0	0	chr00	14003369	14003536	+	168	-	-	-	Unknown protein
MELO3C000447.2	0	0	0	0	0	0	0	0	0	0	0	0	0	0	0	0	0	0	chr00	14019886	14020386	-	501	-	GO:0016020	-	Serine/threonine-protein phosphatase 7 long form-like protein
MELO3C000449.2	2	0.256673	2	0.258864	1	0.112153	17	2.25268	7	0.956165	14	1.58537	6	0.824921	7	0.891915	3	0.400034	chr00	14102921	14103389	+	469	-	GO:0016020;GO:0016021;GO:0016301;GO:0016310;GO:0030247	-	Wall-associated receptor kinase-like 20
MELO3C000450.2	0	0	0	0	0	0	0	0	0	0	0	0	0	0	0	0	0	0	chr00	14114032	14114346	+	315	-	GO:0008152;GO:0016787;GO:0047980	K14664	IAA-amino acid hydrolase ILR1, putative
MELO3C000452.2	612	136.43	591	132.873	688	134.032	524	120.612	583	138.329	748	147.134	398	95.0502	461	102.032	494	114.423	chr00	13960650	13961058	-	270	-	-	-	Coiled-coil protein (DUF572)
MELO3C000453.2	395	27.1095	349	24.1568	475	28.489	194	13.7476	197	14.3905	302	18.2887	313	23.0133	331	22.5542	392	27.9534	chr00	14127209	14128124	+	877	-	GO:0005622;GO:0006913;GO:0008565;GO:0015031	K14293	importin subunit beta-1-like
MELO3C000454.2	0	0	0	0	0	0	2	0.202106	0	0	0	0	0	0	0	0	2	0.203378	chr00	14074868	14075482	-	615	-	GO:0003676	-	Zinc finger protein WIP2
MELO3C000456.2	0	0	0	0	0	0	0	0	0	0	0	0	0	0	0	0	0	0	chr00	14209442	14209601	+	160	-	-	-	Unknown protein
MELO3C000457.2	0	0	0	0	0	0	0	0	0	0	0	0	0	0	0	0	0	0	chr00	14182902	14183603	+	702	-	GO:0016020	-	Serine/threonine-protein phosphatase 7 long form-like protein
MELO3C000458.2	0	0	1	0.244772	1	0.212096	74	18.544	70	18.0823	44	9.42274	0	0	0	0	0	0	chr00	14042447	14042694	-	248	-	-	-	Unknown protein
MELO3C000460.2	96	16.3227	105	18.0053	128	19.0191	77	13.518	79	14.2966	85	12.7524	91	16.5757	88	14.8552	66	11.6597	chr00	14260985	14261338	-	354	-	GO:0031929;GO:0031931	K07204	Regulatory-associated protein of tor 1
MELO3C000464.2	0	0	0	0	0	0	0	0	0	0	0	0	0	0	0	0	0	0	chr00	31745192	31745505	-	314	-	-	-	Unknown protein
MELO3C000465.2	0	0	1	0.269794	4	0.935107	2	0.552422	1	0.284725	2	0.472089	3	0.859751	2	0.531185	1	0.277949	chr00	14282017	14282327	+	225	-	GO:0000103;GO:0000166;GO:0004020;GO:0005524;GO:0016301;GO:0016310;GO:0016740;GO:0070814	K00860	Adenylyl-sulfate kinase
MELO3C000474.2	0	0	0	0	0	0	0	0	1	0.202731	0	0	0	0	0	0	0	0	chr00	14538284	14538599	+	316	-	-	-	Unknown protein
MELO3C000478.2	0	0	0	0	2	0.298016	0	0	0	0	0	0	0	0	0	0	0	0	chr00	14514309	14514661	-	353	-	-	K10400	Unknown protein
MELO3C000479.2	0	0	0	0	0	0	0	0	0	0	0	0	0	0	0	0	0	0	chr00	14612579	14612949	+	306	-	GO:0016020;GO:0016021	-	Lysine histidine transporter
MELO3C000482.2	0	0	0	0	0	0	0	0	2	0.677916	0	0	0	0	1	0.316181	0	0	chr05	23918913	23919101	-	189	-	GO:0000166;GO:0005524;GO:0006508;GO:0008233;GO:0019538	K03696	ATP-dependent clp protease
MELO3C000483.2	74	6.5986	85	7.64415	66	5.14309	114	10.496	73	6.9283	110	8.65496	139	13.2784	78	6.9054	39	3.61334	chr00	14333359	14334153	+	675	-	GO:0000287;GO:0004497;GO:0009507;GO:0009536;GO:0009853;GO:0015977;GO:0015979;GO:0016491;GO:0016829;GO:0016984;GO:0019253;GO:0046872;GO:0055114	K01601	Ribulose bisphosphate carboxylase large chain
MELO3C000487.2	5	0.327119	8	0.527857	7	0.400216	16	1.08083	4	0.278535	15	0.865924	54	3.78477	13	0.844411	59	4.01063	chr00	14129313	14130275	-	920	-	GO:0008168;GO:0008171;GO:0016740;GO:0032259;GO:0046983;GO:0050630	-	O-methyltransferase, putative
MELO3C000488.2	0	0	0	0	0	0	0	0	0	0	0	0	0	0	0	0	0	0	chr00	14651093	14651272	-	180	-	GO:0016020;GO:0016021	-	Coiled-coil domain-containing 73
MELO3C000489.2	0	0	0	0	0	0	0	0	0	0	0	0	0	0	0	0	0	0	chr00	14786329	14786519	+	191	-	-	K02256	Unknown protein
MELO3C000490.2	3	0.898357	6	1.81205	10	2.6169	7	2.16434	6	1.91233	4	1.05692	4	1.28321	2	0.59461	2	0.622275	chr00	14531897	14532097	-	201	-	-	K03043	Unknown protein
MELO3C000497.2	0	0	0	0	0	0	0	0	0	0	0	0	0	0	0	0	0	0	chr00	14750386	14750715	+	330	-	-	-	glial fibrillary acidic protein-like
MELO3C000499.2	0	0	0	0	0	0	0	0	0	0	0	0	0	0	0	0	0	0	chr00	14841055	14841270	+	216	-	-	-	Unknown protein
MELO3C000500.2	10	1.78077	12	2.15516	15	2.33431	17	3.12576	7	1.32675	17	2.67121	21	4.00624	15	2.652	12	2.22031	chr00	14564391	14564827	-	338	-	GO:0009507;GO:0009521;GO:0009523;GO:0009535;GO:0009536;GO:0009579;GO:0009767;GO:0009772;GO:0015979;GO:0016020;GO:0016021;GO:0016168;GO:0018298;GO:0019684;GO:0045156	K02704	Photosystem II CP47 reaction center protein
MELO3C000503.2	328	27.7669	370	31.5898	182	13.4644	3166	276.735	3799	342.3	3136	234.252	1366	123.884	466	39.1665	1236	108.717	chr00	14871451	14872270	-	711	-	GO:0016020;GO:0016021;GO:0022857;GO:0022891;GO:0055085	-	polyol transporter 5-like
MELO3C000505.2	0	0	0	0	0	0	0	0	0	0	0	0	0	0	0	0	0	0	chr12	12400527	12400787	+	261	-	GO:0009058	-	Anthranilate synthase component I-2
MELO3C000507.2	0	0	0	0	0	0	0	0	0	0	0	0	0	0	1	0.118804	0	0	chr00	14923390	14924164	-	503	-	GO:0003677	K09422	Myb transcription factor
MELO3C000512.2	0	0	0	0	1	0.241283	16	4.56128	11	3.23254	10	2.43624	4	1.18314	2	0.548241	7	2.00812	chr00	15086857	15087453	+	218	-	GO:0005215;GO:0006810;GO:0016020;GO:0016021	K03322	Metal transporter
MELO3C000513.2	91	8.90615	65	6.41582	80	6.84225	90	9.09475	156	16.2501	146	12.6082	75	7.86358	77	7.48193	68	6.91484	chr00	15026024	15027226	-	615	-	GO:0016787	-	Alpha/beta hydrolase domain-containing protein 11
MELO3C000514.2	1	0.157979	1	0.159327	1	0.138057	0	0	0	0	0	0	2	0.338485	2	0.313692	0	0	chr00	15072252	15072632	-	381	-	-	-	Unknown protein
MELO3C000515.2	3	0.158394	1	0.0532487	1	0.0461402	1	0.0545153	0	0	0	0	3	0.169688	0	0	5	0.274292	chr00	15049793	15051137	+	1140	-	GO:0007165;GO:0043531	-	TMV resistance protein N-like isoform X1
MELO3C000517.2	8	0.864487	5	0.544915	4	0.377736	16	1.78521	6	0.690087	6	0.5721	5	0.578827	5	0.53643	2	0.224555	chr00	14917154	14918070	-	557	-	GO:0000287;GO:0003824;GO:0004743;GO:0006096;GO:0016301;GO:0016310;GO:0016740;GO:0030955	K00873	Pyruvate kinase
MELO3C000519.2	0	0	0	0	0	0	0	0	0	0	0	0	0	0	0	0	0	0	chr00	15174367	15174591	+	225	-	-	-	Unknown protein
MELO3C000522.2	0	0	0	0	0	0	0	0	0	0	0	0	0	0	0	0	0	0	chr00	15222407	15223057	+	204	-	GO:0016491;GO:0055114	K00574	Cyclopropane-fatty-acyl-phospholipid synthase family protein
MELO3C000525.2	0	0	0	0	0	0	0	0	0	0	0	0	0	0	0	0	0	0	chr00	15267040	15267357	+	318	-	GO:0008168;GO:0008171;GO:0016740;GO:0032259;GO:0046983	-	O-methyltransferase
MELO3C000526.2	7	1.10876	5	0.798731	1	0.13842	1	0.163546	8	1.3487	8	1.1181	6	1.01813	2	0.314517	7	1.15203	chr00	15132496	15133060	-	380	-	-	K14945	Unknown protein
MELO3C000527.2	0	0	1	0.0412108	2	0.0714186	0	0	0	0	3	0.108167	0	0	0	0	3	0.12737	chr00	15287115	15291278	+	1473	-	GO:0003677;GO:0005634	-	homeobox protein knotted-1-like 2
MELO3C000530.2	0	0	0	0	0	0	0	0	0	0	0	0	0	0	0	0	0	0	chr00	15390039	15390454	-	318	-	-	-	Unknown protein
MELO3C000533.2	0	0	0	0	0	0	0	0	0	0	0	0	0	0	0	0	0	0	chr00	15349584	15350536	-	851	-	GO:0005507;GO:0016491;GO:0055114	K00423	L-ascorbate oxidase homolog
MELO3C000534.2	0	0	0	0	0	0	0	0	0	0	0	0	0	0	1	0.118568	0	0	chr00	15274309	15274812	-	504	-	GO:0005515;GO:0005634;GO:0005737;GO:0009864;GO:0009944;GO:0009954;GO:0010227;GO:0010254;GO:0010434;GO:0010582;GO:0016567;GO:0019005;GO:0030162;GO:0031625;GO:0042787;GO:0043161;GO:0048439	K14508	Regulatory protein NPR5
MELO3C000537.2	5	0.369717	14	1.04404	3	0.193857	11	0.839831	6	0.472209	13	0.848194	7	0.554508	8	0.587305	9	0.691459	chr00	15383087	15383900	-	814	-	GO:0004497;GO:0016491;GO:0055114;GO:0071949	-	Monooxygenase, FAD-binding protein
MELO3C000538.2	2323	187.679	2297	187.163	3559	251.279	574	47.8827	561	48.2408	684	48.7614	916	79.2817	1654	132.671	1519	127.512	chr00	15399103	15400138	-	745	-	GO:0016301;GO:0016310	-	Sensor histidine kinase resE
MELO3C000540.2	93	8.18371	79	7.01109	61	4.69092	53	4.81552	31	2.90344	48	3.72702	70	6.59897	64	5.59142	51	4.66297	chr00	15357869	15358869	-	684	-	GO:0016020;GO:0016021;GO:0030001;GO:0046873;GO:0055085	K09529	Chaperone protein dnaJ 6
MELO3C000543.2	0	0	0	0	0	0	0	0	0	0	0	0	0	0	0	0	0	0	chr00	15509324	15509497	+	174	-	-	-	Unknown protein
MELO3C000545.2	0	0	0	0	0	0	0	0	0	0	0	0	0	0	0	0	0	0	chr00	15487948	15488106	-	159	-	-	-	Unknown protein
MELO3C000547.2	0	0	0	0	0	0	0	0	0	0	0	0	0	0	0	0	0	0	chr00	15542793	15543107	+	315	-	-	-	Unknown protein
MELO3C000551.2	0	0	0	0	0	0	0	0	0	0	0	0	0	0	0	0	0	0	chr00	15726713	15727219	+	507	-	GO:0004857;GO:0043086	-	Pectinesterase inhibitor
MELO3C000553.2	0	0	0	0	0	0	0	0	0	0	0	0	0	0	0	0	0	0	chr00	15628090	15628275	+	186	-	-	-	Unknown protein
MELO3C000565.2	0	0	0	0	0	0	0	0	0	0	0	0	0	0	0	0	0	0	chr00	15830666	15830902	+	237	-	-	-	Unknown protein
MELO3C000569.2	9	2.28569	1	0.256133	6	1.33164	2	0.524451	5	1.35154	3	0.672278	7	1.90451	3	0.756434	5	1.31938	chr00	15840760	15840996	+	237	-	GO:0003677;GO:0004386;GO:0008270;GO:0016787;GO:0046872	-	Chromodomain-helicase-DNA-binding protein 4
MELO3C000574.2	0	0	0	0	0	0	0	0	0	0	0	0	0	0	0	0	0	0	chr02	9272598	9272803	-	206	-	-	-	Unknown protein
MELO3C000583.2	35	3.41988	66	6.50395	46	3.92791	6	0.605332	20	2.07997	31	2.67274	62	6.49	73	7.08175	54	5.48228	chr00	16107495	16108110	+	616	-	GO:0000786;GO:0003677;GO:0005634;GO:0005694;GO:0046982	K11253	Histone H3
MELO3C000585.2	0	0	0	0	0	0	0	0	0	0	0	0	0	0	0	0	0	0	chr00	16096037	16096837	+	801	-	GO:0000287;GO:0009055;GO:0009507;GO:0009522;GO:0009535;GO:0009536;GO:0009579;GO:0015979;GO:0016020;GO:0016021;GO:0016168;GO:0016491;GO:0018298;GO:0046872;GO:0051536;GO:0051539;GO:0055114	K02689	Photosystem I P700 chlorophyll a apoprotein A1
MELO3C000589.2	4	0.626978	0	0	0	0	2	0.323685	0	0	1	0.138307	7	1.17544	0	0	10	1.62861	chr00	16127250	16127633	-	384	-	GO:0004672;GO:0004675;GO:0005524;GO:0005886;GO:0006468;GO:0007166;GO:0007178;GO:0016301;GO:0016310	-	Kinase family protein
MELO3C000592.2	1362	120.203	1466	130.486	1445	111.447	6616	602.885	6636	623.347	8809	685.991	1359	128.49	1293	113.295	1355	124.252	chr00	16323481	16324584	-	682	-	GO:0005524;GO:0006457;GO:0006950;GO:0051082	K04079	Heat shock protein, putative
MELO3C000599.2	16	3.56681	38	8.54347	31	6.03923	22	5.06387	16	3.79633	34	6.68792	49	11.7022	31	6.86114	27	6.25386	chr00	16236833	16237191	-	270	-	GO:0003989;GO:0005524;GO:0006633	K11262	acetyl-CoA carboxylase 1-like
MELO3C000601.2	4	0.35302	4	0.356033	10	0.771258	13	1.18463	12	1.12721	4	0.311495	8	0.756379	5	0.438111	7	0.641892	chr00	16328028	16328849	+	682	-	GO:0003677;GO:0003899;GO:0006351;GO:0009507;GO:0009536;GO:0016740;GO:0016779	K03046	DNA-directed RNA polymerase subunit beta'
MELO3C000605.2	0	0	0	0	0	0	0	0	0	0	0	0	0	0	0	0	0	0	chr00	16393180	16393401	+	222	-	-	-	Unknown protein
MELO3C000606.2	247	98.4563	203	81.6081	265	92.3109	141	58.0317	110	46.6685	147	51.7031	123	52.5245	138	54.6135	154	63.7811	chr00	18791946	18792096	-	151	-	-	K05768	Unknown protein
MELO3C000608.2	0	0	0	0	0	0	0	0	0	0	0	0	0	0	0	0	0	0	chr00	16565299	16565862	+	564	-	-	-	Unknown protein
MELO3C000609.2	15	1.21678	37	3.027	14	0.992449	1	0.0837567	0	0	4	0.286307	14	1.21663	14	1.12751	13	1.09569	chr00	16408475	16409309	-	742	-	GO:0000785;GO:0000786;GO:0003677;GO:0005634;GO:0006334;GO:0006355	-	HMG-Y-related protein A
MELO3C000611.2	80	20.845	64	16.8183	82	18.6718	123	33.0915	137	37.9941	161	37.016	57	15.911	76	19.6607	69	18.6804	chr00	16465411	16465886	-	231	-	GO:0008270	K13094	SUPPRESSOR OF ABI3-5-like
MELO3C000612.2	0	0	0	0	0	0	0	0	0	0	0	0	0	0	0	0	0	0	chr00	16418907	16419169	+	263	-	-	-	Unknown protein
MELO3C000613.2	7176	851.919	7117	852.125	7543	782.564	341	41.7994	340	42.9614	316	33.1021	2900	368.828	4260	502.111	4010	494.635	chr00	16433109	16433615	-	507	-	GO:0004497;GO:0005506;GO:0016020;GO:0016021;GO:0016491;GO:0016705;GO:0020037;GO:0046872;GO:0055114	-	Cytochrome P450
MELO3C000615.2	49	3.27337	38	2.5602	40	2.33517	79	5.44911	93	6.6125	103	6.0714	29	2.07543	28	1.85708	42	2.91523	chr00	16380712	16381612	-	901	-	GO:0003677;GO:0003700;GO:0005634;GO:0006351;GO:0006355	-	Trihelix transcription factor GT-2
MELO3C000620.2	0	0	0	0	0	0	0	0	0	0	0	0	0	0	0	0	0	0	chr00	16549755	16551244	-	1198	-	GO:0004650;GO:0005975	K01213	polygalacturonase-like
MELO3C000622.2	0	0	0	0	0	0	0	0	0	0	0	0	0	0	0	0	0	0	chr00	16643567	16654368	+	1170	-	GO:0005215;GO:0006810;GO:0016020;GO:0016021;GO:0022857;GO:0022891;GO:0055085	-	Retrovirus-related Pol polyprotein LINE-1
MELO3C000623.2	5	0.451876	10	0.911465	13	1.02672	14	1.3064	4	0.384763	16	1.27592	16	1.5491	11	0.986999	13	1.22072	chr00	27076221	27076931	+	666	-	GO:0003735;GO:0005622;GO:0005840;GO:0006412;GO:0009507;GO:0009536;GO:0015935;GO:0030529	K02967	30S ribosomal protein S2, chloroplastic
MELO3C000631.2	0	0	0	0	0	0	0	0	0	0	0	0	0	0	0	0	0	0	chr00	16647239	16647958	-	609	-	GO:0000166;GO:0005524;GO:0006810;GO:0016021;GO:0016887;GO:0042626;GO:0055085	-	ABC transporter C family member 2-like
MELO3C000643.2	0	0	0	0	0	0	0	0	0	0	0	0	0	0	0	0	0	0	chr00	16655927	16656445	-	519	-	GO:0004857;GO:0043086;GO:0046910	-	pectinesterase inhibitor-like
MELO3C000644.2	0	0	0	0	0	0	0	0	0	0	0	0	0	0	0	0	0	0	chr00	16789619	16790071	+	453	-	GO:0016021;GO:0031347;GO:0071446;GO:2000031	-	ankyrin repeat-containing protein At5g02620-like
MELO3C000645.2	16	1.11851	13	0.916546	18	1.09965	2	0.144361	7	0.520838	4	0.246736	9	0.674021	8	0.555245	16	1.16216	chr00	20779675	20782532	+	861	-	GO:0003676;GO:0008270	-	MuDRA transposase-like
MELO3C000650.2	0	0	0	0	0	0	0	0	0	0	0	0	0	0	0	0	0	0	chr00	16806509	16807132	-	374	-	-	-	Unknown protein
MELO3C000653.2	2	0.464787	0	0	0	0	0	0	1	0.247348	0	0	0	0	0	0	0	0	chr05	10130958	10131587	-	259	-	GO:0016020;GO:0016021	-	NBS-LRR type resistance protein
MELO3C000655.2	87	5.32708	136	8.39846	56	2.99653	26	1.64378	33	2.15064	31	1.67488	128	8.39635	294	17.8728	223	14.1873	chr00	16994682	16995768	-	983	-	GO:0005506;GO:0016705;GO:0020037;GO:0055114	-	cytochrome P450 76C4
MELO3C000658.2	0	0	0	0	0	0	0	0	0	0	0	0	0	0	0	0	0	0	chr00	16798198	16798444	+	247	-	-	-	Unknown protein
MELO3C000665.2	0	0	0	0	0	0	0	0	0	0	0	0	0	0	0	0	0	0	chr06	12156378	12157354	-	977	-	GO:0016020;GO:0016021	-	Transmembrane protein, putative
MELO3C000666.2	0	0	0	0	3	0.331511	0	0	0	0	0	0	0	0	2	0.251085	0	0	chr00	17068692	17069522	+	476	-	GO:0004553;GO:0005975	-	beta-galactosidase-like
MELO3C000667.2	0	0	0	0	0	0	0	0	0	0	0	0	0	0	0	0	0	0	chr02	10531502	10531707	+	206	-	-	-	Unknown protein
MELO3C000668.2	16	2.06661	15	1.95398	9	1.01588	16	2.13382	19	2.61201	18	2.05146	8	1.10698	19	2.4365	11	1.47623	chr00	16964559	16965024	+	466	-	GO:0006855;GO:0015238;GO:0015297;GO:0016020;GO:0016021;GO:0055085	K03327	Protein DETOXIFICATION
MELO3C000671.2	124	23.9216	161	31.3246	170	28.6601	21	4.183	43	8.82921	49	8.34099	123	25.4205	137	26.24	135	27.06	chr00	17158419	17158730	+	312	-	GO:0016020;GO:0016021	K09534	DnaJ like subfamily C member 14
MELO3C000673.2	313	41.7726	318	42.8021	396	46.1852	252	34.7254	194	27.5571	263	30.971	270	38.603	341	45.1831	349	48.3946	chr00	17161278	17161953	-	451	-	GO:0004222;GO:0005524;GO:0006508;GO:0008233;GO:0008237	-	ATP-dependent zinc metalloprotease FtsH
MELO3C000680.2	68	8.36997	34	4.2207	18	1.93619	54	6.86291	57	7.46748	54	5.86491	450	59.3386	458	55.9699	280	35.8094	chr00	17131114	17131692	+	489	-	GO:0016020;GO:0016021	-	Tetraspanin family protein
MELO3C000682.2	44	6.1022	38	5.31506	71	8.60503	24	3.43673	27	3.98549	20	2.44746	40	5.94298	48	6.60921	35	5.04344	chr00	16725886	16730265	+	434	-	GO:0005975;GO:0016301;GO:0016310;GO:0016773	-	FGGY carbohydrate kinase domain-containing protein
MELO3C000684.2	1	0.0563049	0	0	0	0	0	0	0	0	0	0	1	0.0603193	0	0	0	0	chr00	17305704	17306886	+	1069	-	GO:0006633;GO:0016491;GO:0016702;GO:0031408;GO:0046872;GO:0051213;GO:0055114	K00454	Lipoxygenase
MELO3C000685.2	0	0	0	0	0	0	0	0	0	0	0	0	0	0	1	0.127689	0	0	chr00	17301893	17302471	+	468	-	GO:0004867;GO:0009611;GO:0010951	-	Inhibitor protein
MELO3C000692.2	0	0	0	0	0	0	0	0	0	0	0	0	0	0	0	0	0	0	chr00	24008495	24010292	-	364	-	-	-	Unknown protein
MELO3C000695.2	0	0	0	0	0	0	0	0	0	0	0	0	0	0	0	0	0	0	chr00	17501662	17506725	+	856	-	GO:0004553;GO:0005975;GO:0008152;GO:0016787;GO:0016798	K01179	Glycosyl hydrolase family 5 protein
MELO3C000701.2	1	0.0751434	0	0	1	0.0656676	0	0	1	0.0799789	1	0.0663046	0	0	0	0	0	0	chr00	17408226	17409026	+	801	-	GO:0003677;GO:0003899;GO:0006351;GO:0009507;GO:0009536;GO:0016740;GO:0016779	K03046	DNA-directed RNA polymerase subunit beta''
MELO3C000703.2	975	146.713	904	137.19	931	122.426	1572	244.24	976	156.314	1227	162.915	921	148.468	814	121.608	1059	165.571	chr00	17600170	17600851	-	400	-	GO:0000166;GO:0004672;GO:0004674;GO:0005524;GO:0006468;GO:0016301;GO:0016310	-	Protein kinase
MELO3C000704.2	128	21.4009	157	26.4735	159	23.2316	145	25.0316	173	30.7859	204	30.0957	87	15.583	100	16.5995	55	9.55451	chr00	17677884	17678347	+	360	-	GO:0000502;GO:0004175;GO:0004298;GO:0005634;GO:0005737;GO:0005839;GO:0006508;GO:0008233;GO:0016787;GO:0051603	K02738	Proteasome subunit beta type
MELO3C000706.2	0	0	0	0	0	0	0	0	0	0	1	0.24588	0	0	0	0	0	0	chr00	17692325	17692540	-	216	-	-	-	Unknown protein
MELO3C000707.2	0	0	0	0	0	0	0	0	0	0	0	0	0	0	0	0	0	0	chr00	17618817	17619318	+	435	-	GO:0016020;GO:0016021	-	NBS-LRR type resistance protein
MELO3C000708.2	0	0	0	0	0	0	0	0	0	0	0	0	0	0	0	0	0	0	chr00	17556529	17556776	-	221	-	-	-	Unknown protein
MELO3C000709.2	7	1.48355	2	0.42749	7	1.29647	11	2.40712	7	1.57902	5	0.935035	4	0.908188	7	1.47292	5	1.10103	chr00	17689566	17690104	+	284	-	-	K15728	Phosphatidate phosphatase PAH2
MELO3C000712.2	0	0	0	0	0	0	0	0	0	0	0	0	0	0	0	0	0	0	chr00	19809617	19810054	+	438	-	GO:0016020;GO:0016021	-	Leguminosin group486 secreted peptide
MELO3C000713.2	0	0	0	0	0	0	2	0.273777	0	0	0	0	0	0	0	0	0	0	chr00	12962981	12963434	-	454	-	GO:0005739;GO:0016020;GO:0016021	-	Succinate dehydrogenase subunit 4
MELO3C000718.2	0	0	0	0	0	0	0	0	0	0	0	0	0	0	0	0	0	0	chr00	17838519	17839345	-	827	-	GO:0004970;GO:0006810;GO:0006811;GO:0016020;GO:0016021;GO:0035235	K05387	Glutamate receptor
MELO3C000721.2	0	0	0	0	0	0	0	0	0	0	0	0	0	0	0	0	0	0	chr00	17881740	17881946	-	207	-	-	-	Unknown protein
MELO3C000722.2	0	0	0	0	0	0	0	0	0	0	0	0	0	0	0	0	0	0	chr00	17867804	17868364	-	561	-	GO:0004857;GO:0043086;GO:0046910	-	pectinesterase inhibitor-like
MELO3C000729.2	120	48.1519	112	45.3253	129	45.2358	143	59.2472	100	42.7087	115	40.7177	103	44.2772	101	40.2373	96	40.0247	chr00	17655701	17655850	-	150	-	GO:0006810;GO:0008137;GO:0009507;GO:0009535;GO:0009536;GO:0009579;GO:0016020;GO:0016021;GO:0016491;GO:0016655;GO:0019684;GO:0042773;GO:0048038;GO:0055114	K05573	NAD(P)H-quinone oxidoreductase subunit 2, chloroplastic
MELO3C000732.2	0	0	0	0	0	0	0	0	0	0	0	0	0	0	0	0	0	0	chr00	17883726	17884315	-	590	-	GO:0004129;GO:0005507;GO:0016020;GO:0046872;GO:1902600	-	Copper centre Cu(A)
MELO3C000736.2	157	12.5998	173	14.0023	168	11.7824	109	9.0321	156	13.3251	181	12.8172	139	11.9505	134	10.6768	139	11.5905	chr00	18055307	18056056	+	750	-	GO:0000145;GO:0006810;GO:0006887;GO:0006904	K19985	Exocyst complex component
MELO3C000737.2	0	0	0	0	0	0	0	0	0	0	0	0	0	0	0	0	0	0	chr08	15596028	15596236	-	209	-	-	-	Unknown protein
MELO3C000742.2	0	0	0	0	0	0	0	0	0	0	0	0	0	0	0	0	0	0	chr00	18025769	18026287	-	519	-	GO:0004650;GO:0005975	K01213	polygalacturonase-like
MELO3C000744.2	0	0	0	0	0	0	0	0	0	0	0	0	0	0	0	0	0	0	chr00	18179165	18179674	+	510	-	-	-	Unknown protein
MELO3C000745.2	0	0	0	0	0	0	0	0	0	0	0	0	0	0	0	0	0	0	chr00	18254707	18254864	+	158	-	-	-	Unknown protein
MELO3C000754.2	15	4.82807	24	7.79083	25	7.03206	19	6.31445	25	8.56458	14	3.97615	14	4.82748	21	6.71082	18	6.01976	chr00	18347154	18347583	-	187	-	GO:0003723;GO:0003735;GO:0005840;GO:0006412;GO:0015934;GO:0030529	K02863	Ribosomal protein
MELO3C000756.2	186	34.5535	174	32.6001	201	32.6313	136	26.0866	177	34.9974	196	32.1283	155	30.8475	193	35.5968	155	29.9182	chr00	18400385	18400854	-	324	-	GO:0000049;GO:0000166;GO:0003676;GO:0003723;GO:0004812;GO:0004813;GO:0005524;GO:0005737;GO:0005739;GO:0006412;GO:0006419;GO:0008270;GO:0016874;GO:0016876;GO:0043039;GO:0046872;GO:0070143	K01872	Alanine--tRNA ligase
MELO3C000759.2	0	0	0	0	0	0	0	0	0	0	0	0	0	0	2	0.361077	0	0	chr00	18570160	18570490	+	331	-	GO:0003735;GO:0005739;GO:0005840;GO:0006412	-	Ribosomal protein L5
MELO3C000760.2	114	9.81638	159	13.8081	178	13.3945	19	1.68927	17	1.55804	27	2.05146	184	16.9736	161	13.7641	134	11.9888	chr00	18458129	18458827	-	699	-	GO:0016491;GO:0055114	K00793	riboflavin synthase
MELO3C000761.2	5929	368.283	5987	375.059	6883	373.627	7949	509.814	8862	585.89	10668	584.703	7303	485.972	8781	541.525	8459	545.938	chr00	18485409	18486377	-	969	-	GO:0003746;GO:0003924;GO:0005525;GO:0006414	K03234	elongation factor 2
MELO3C000762.2	529	123.893	585	138.177	614	125.666	626	151.379	599	149.314	849	175.449	305	76.5245	297	69.0592	306	74.4623	chr00	18514706	18515035	+	257	-	GO:0000502;GO:0004175;GO:0004298;GO:0005634;GO:0005737;GO:0005839;GO:0006508;GO:0008233;GO:0016787;GO:0019774;GO:0043161;GO:0051603	K02735	Proteasome subunit beta type
MELO3C000763.2	0	0	5	1.71479	2	0.594348	3	1.05335	0	0	3	0.900169	7	2.55011	2	0.675235	6	2.11995	chr00	18537459	18537635	-	177	-	GO:0000166;GO:0005524;GO:0005737;GO:0005783;GO:0006810;GO:0016787;GO:0016887;GO:0045048	K01551	ATPase ASNA1 homolog
MELO3C000768.2	380	70.5931	364	68.1978	476	77.2762	168	32.2246	236	46.6632	337	55.2409	278	55.3266	315	58.0983	254	49.0272	chr00	18572453	18573159	+	324	-	-	K01267	Unknown protein
MELO3C000769.2	169	11.9672	177	12.6406	251	15.5324	32	2.33967	29	2.18568	48	2.99915	238	18.0548	193	13.5686	150	11.0362	chr05	435263	436422	+	850	-	GO:0003824;GO:0008152;GO:0016020;GO:0016021	-	Acetyl-coenzyme A synthetase
MELO3C000770.2	0	0	0	0	0	0	0	0	0	0	0	0	0	0	0	0	0	0	chr00	18587538	18588417	+	598	-	GO:0006633;GO:0016491;GO:0016702;GO:0031408;GO:0046872;GO:0051213;GO:0055114	K00454	Lipoxygenase
MELO3C000772.2	0	0	0	0	0	0	0	0	0	0	0	0	0	0	0	0	0	0	chr00	18502154	18502659	+	447	-	GO:0004601;GO:0005576;GO:0006979;GO:0016491;GO:0020037;GO:0042744;GO:0046872;GO:0055114	K00430	Peroxidase
MELO3C000773.2	7	2.50791	16	5.78129	14	4.38332	4	1.4797	2	0.762656	3	0.948392	21	8.06017	14	4.97986	9	3.35028	chr00	18525361	18525825	+	168	-	GO:0016787	K14977	(S)-ureidoglycine aminohydrolase
MELO3C000776.2	5	0.376658	20	1.51949	0	0	54	4.2002	246	19.7241	190	12.6294	1	0.0807025	8	0.598331	1	0.0782711	chr00	18491177	18492178	+	799	-	GO:0005215;GO:0006810;GO:0016020;GO:0016021	K09872	Aquaporin
MELO3C000779.2	0	0	0	0	0	0	0	0	0	0	0	0	0	0	0	0	0	0	chr00	18810107	18810364	-	258	-	-	-	Unknown protein
MELO3C000781.2	0	0	0	0	0	0	0	0	0	0	0	0	0	0	0	0	0	0	chr00	18773099	18775391	-	613	-	GO:0000166;GO:0005524;GO:0006810;GO:0016020;GO:0016021;GO:0016887;GO:0042626;GO:0055085	-	ABC transporter family protein
MELO3C000787.2	5	0.200233	6	0.24233	18	0.629937	1	0.0413489	0	0	1	0.035336	6	0.25741	5	0.198797	11	0.457701	chr00	19105706	19107208	-	1503	-	GO:0016020	-	Serine/threonine-protein phosphatase 7 long form-like protein
MELO3C000788.2	0	0	0	0	0	0	0	0	0	0	0	0	0	0	1	0.081973	0	0	chr00	18506887	18509321	-	729	-	GO:0003677	-	nodulin homeobox isoform X2
MELO3C000790.2	0	0	0	0	0	0	0	0	0	0	0	0	0	0	0	0	0	0	chr00	18893421	18893608	-	188	-	-	-	Unknown protein
MELO3C000792.2	1	0.12014	2	0.24233	0	0	0	0	0	0	1	0.106008	0	0	5	0.59639	0	0	chr00	18901414	18901914	+	501	-	-	-	Unknown protein
MELO3C000794.2	3	0.835971	3	0.843105	9	2.19166	7	2.01404	9	2.6693	3	0.737639	2	0.597049	4	1.10664	1	0.289531	chr00	18770707	18770922	+	216	-	GO:0000166;GO:0005524;GO:0019538	K03696	Chaperone protein ClpC, chloroplastic
MELO3C000795.2	7	0.590097	1	0.085019	8	0.589353	0	0	0	0	0	0	4	0.36124	5	0.418475	6	0.525535	chr00	18949595	18950308	+	714	-	GO:0008483;GO:0009506;GO:0016740	-	Aminotransferase-like, plant mobile domain family protein
MELO3C000796.2	0	0	0	0	0	0	0	0	0	0	0	0	0	0	0	0	0	0	chr00	18912911	18913138	+	228	-	-	K15306	Unknown protein
MELO3C000797.2	0	0	0	0	0	0	0	0	0	0	0	0	0	0	0	0	0	0	chr00	19020839	19021108	-	270	-	GO:0003723;GO:0004519;GO:0005739;GO:0009451;GO:0043231;GO:0090305	-	Pentatricopeptide repeat-containing protein At3g09040, mitochondrial
MELO3C000805.2	0	0	0	0	0	0	3	0.706221	0	0	0	0	0	0	0	0	0	0	chr00	19056704	19057066	+	264	-	GO:0003682;GO:0007064;GO:0008270;GO:0010468;GO:0046872	K06672	PHD finger family protein
MELO3C000806.2	0	0	0	0	0	0	2	0.210313	1	0.108398	0	0	0	0	17	1.71894	0	0	chr00	19132934	19133524	-	591	-	GO:0004097;GO:0008152;GO:0016491;GO:0046148;GO:0046872;GO:0055114	K00422	Polyphenol oxidase
MELO3C000813.2	0	0	0	0	0	0	0	0	0	0	0	0	0	0	0	0	0	0	chr00	19188088	19188330	+	243	-	-	-	Unknown protein
MELO3C000816.2	0	0	0	0	0	0	0	0	0	0	0	0	0	0	0	0	0	0	chr00	19309227	19309982	+	756	-	GO:0016020;GO:0016021	-	Carbohydrate esterase, putative (DUF303)
MELO3C000817.2	102	33.0074	164	53.5236	112	31.673	37	12.3627	32	11.0216	35	9.99381	175	60.6679	90	28.9153	125	42.0286	chr00	19185412	19185697	+	186	-	GO:0016020;GO:0016021;GO:0030001;GO:0046873;GO:0055085	K16075	Magnesium transporter MRS2-like protein
MELO3C000818.2	0	0	0	0	0	0	0	0	0	0	0	0	0	0	0	0	0	0	chr00	19204783	19205019	+	237	-	-	K15198	Unknown protein
MELO3C000821.2	0	0	0	0	0	0	0	0	0	0	0	0	0	0	0	0	0	0	chr00	19197780	19197949	-	170	-	GO:0006270;GO:0051301	K02213	cell division control protein 6 homolog B
MELO3C000822.2	4	0.167894	3	0.126995	6	0.220083	2	0.0866771	1	0.0446744	1	0.0370362	5	0.22483	11	0.458397	3	0.130834	chr00	19357597	19360666	-	1434	-	GO:0004672;GO:0005524;GO:0006468;GO:0016020;GO:0016021;GO:0016301;GO:0016310	-	Receptor-like protein kinase, putative
MELO3C000826.2	27	3.54058	22	2.90954	43	4.92765	2	0.270795	12	1.67485	3	0.347124	7	0.983375	26	3.385	34	4.63249	chr00	19475892	19476350	-	459	-	GO:0046983	-	Transcription factor
MELO3C000827.2	0	0	0	0	0	0	0	0	0	0	0	0	1	0.225459	0	0	0	0	chr00	10591802	10592087	-	286	-	GO:0006754;GO:0006810;GO:0006811;GO:0009507;GO:0009535;GO:0009536;GO:0009579;GO:0015078;GO:0015986;GO:0015992;GO:0016020;GO:0016021;GO:0045263;GO:0046933	K02109	ATP synthase subunit b, chloroplastic
MELO3C000830.2	0	0	0	0	0	0	0	0	1	0.331933	0	0	0	0	0	0	0	0	chr00	19279916	19280108	-	193	-	-	-	Unknown protein
MELO3C000835.2	0	0	0	0	0	0	0	0	0	0	0	0	0	0	0	0	0	0	chr00	19532915	19533070	-	156	-	GO:0000139;GO:0005198;GO:0005737;GO:0005794;GO:0006810;GO:0006886;GO:0015031;GO:0016020;GO:0016192;GO:0030117;GO:0030663;GO:0031410	K17302	Coatomer subunit beta'
MELO3C000841.2	298	23.1739	321	25.1755	287	19.5041	1008	80.9362	976	80.7824	1250	85.7719	348	28.9916	303	23.3938	363	29.3301	chr00	19620115	19621933	+	774	-	GO:0016020;GO:0016021;GO:0016740;GO:0016757;GO:0033843	K08238	Xyloglucan 6-xylosyltransferase, putative
MELO3C000846.2	0	0	0	0	0	0	0	0	0	0	0	0	0	0	0	0	0	0	chr00	19649897	19650271	+	375	-	GO:0071465;GO:1902075	-	Desiccation-related protein PCC13-62
MELO3C000849.2	15	2.48719	8	1.33782	16	2.31845	3	0.513615	0	0	8	1.17047	46	8.17119	41	6.74956	59	10.1647	chr00	19550845	19551207	-	363	-	GO:0004252;GO:0006508;GO:0008233;GO:0016787	-	Subtilisin-like protease
MELO3C000850.2	0	0	0	0	0	0	0	0	0	0	0	0	0	0	0	0	0	0	chr00	13765033	13765417	-	385	-	GO:0005506;GO:0009055;GO:0009507;GO:0009523;GO:0009535;GO:0009536;GO:0009579;GO:0009635;GO:0009772;GO:0015979;GO:0016020;GO:0016021;GO:0016168;GO:0016491;GO:0016682;GO:0018298;GO:0019684;GO:0045156;GO:0046872;GO:0055114	K02703	Photosystem II protein D1
MELO3C000851.2	0	0	0	0	0	0	0	0	0	0	0	0	0	0	0	0	0	0	chr00	20771468	20771686	+	219	-	-	-	Unknown protein
MELO3C000853.2	0	0	0	0	0	0	0	0	0	0	0	0	0	0	0	0	0	0	chr00	19661353	19661620	+	268	-	-	-	Unknown protein
MELO3C000855.2	0	0	0	0	0	0	0	0	0	0	0	0	0	0	0	0	0	0	chr00	19736288	19736498	-	211	-	-	-	Unknown protein
MELO3C000865.2	2	0.497437	0	0	1	0.217354	0	0	0	0	0	0	2	0.532903	0	0	0	0	chr00	20027113	20027446	-	242	-	GO:0003723;GO:0003746;GO:0006452;GO:0043022;GO:0045901;GO:0045905	K02180	mitotic checkpoint protein BUB3.3-like
MELO3C000868.2	47	6.54844	44	6.18277	37	4.50507	156	22.4421	112	16.6089	100	12.294	118	17.613	66	9.12974	85	12.3051	chr00	20115680	20116351	+	432	-	GO:0000166;GO:0000287;GO:0004012;GO:0005524;GO:0015914;GO:0016020;GO:0016021;GO:0016787;GO:0045332;GO:0046872	K01530	Phospholipid-transporting ATPase
MELO3C000875.2	0	0	0	0	0	0	0	0	0	0	0	0	0	0	0	0	0	0	chr00	19936186	19936451	-	266	-	-	-	glial fibrillary acidic protein-like
MELO3C000879.2	2	0.716546	1	0.361331	1	0.313094	0	0	8	3.05062	3	0.948392	1	0.383817	1	0.355704	0	0	chr00	19596047	19596214	-	168	-	GO:0003723;GO:0006397;GO:0008033;GO:0008380;GO:0009507;GO:0009536	K20000	Maturase K
MELO3C000881.2	320	121.137	313	119.498	380	125.71	175	68.4013	139	56.0048	138	46.0955	197	79.892	270	101.476	229	90.0713	chr00	20278326	20278484	+	159	-	-	K14396	Unknown protein
MELO3C000885.2	0	0	1	0.128882	3	0.33503	1	0.131948	3	0.408045	3	0.33828	9	1.23213	7	0.888128	4	0.531114	chr00	20311284	20311754	-	471	-	GO:0009733	K14488	auxin-responsive protein SAUR71-like
MELO3C000887.2	28	2.67087	45	4.3291	12	1.00031	1	0.0984904	33	3.35037	41	3.45089	3	0.306567	11	1.04175	4	0.396441	chr05	26185828	26186458	+	631	-	GO:0004866;GO:0010951	-	Kunitz-type trypsin inhibitor
MELO3C000888.2	0	0	0	0	0	0	0	0	0	0	0	0	0	0	0	0	0	0	chr00	20814727	20815266	-	540	-	-	-	Unknown protein
MELO3C000894.2	0	0	0	0	0	0	0	0	0	0	0	0	0	0	0	0	0	0	chr00	20465055	20465325	+	271	-	-	-	Unknown protein
MELO3C000897.2	0	0	0	0	0	0	2	0.149753	0	0	5	0.31994	7	0.543818	4	0.287992	14	1.05487	chr00	20516283	20518486	-	830	-	GO:0016020;GO:0016021	-	BnaA07g12620D protein
MELO3C000900.2	0	0	8	0.884569	9	0.862291	3	0.339604	2	0.233381	3	0.290218	2	0.234905	6	0.653096	1	0.113914	chr00	20005043	20005591	+	549	-	GO:0000166;GO:0005524;GO:0009507;GO:0009536;GO:0009570;GO:0016020;GO:0016021	-	Protein Ycf2
MELO3C000904.2	0	0	0	0	0	0	0	0	0	0	0	0	0	0	0	0	0	0	chr00	20204740	20205185	+	446	-	GO:0016020;GO:0016021	-	NBS-LRR type resistance protein
MELO3C000905.2	0	0	0	0	0	0	0	0	0	0	0	0	0	0	0	0	0	0	chr00	19325775	19325996	+	222	-	-	-	Unknown protein
MELO3C000909.2	0	0	0	0	0	0	0	0	0	0	0	0	0	0	1	0.337617	2	0.706651	chr00	20457802	20457978	+	177	-	GO:0016020;GO:0016021	-	Ankyrin repeat family protein, putative
MELO3C000910.2	0	0	0	0	0	0	0	0	0	0	0	0	0	0	0	0	0	0	chr00	20617180	20617502	+	323	-	GO:0016020;GO:0016021	-	Lysine histidine transporter
MELO3C000911.2	0	0	0	0	0	0	28	4.83369	29	5.16064	33	4.86841	2	0.35823	33	5.47784	4	0.694874	chr00	20385572	20385931	-	360	-	GO:0001172;GO:0003723;GO:0003968;GO:0016020;GO:0016021;GO:0016740;GO:0016779;GO:0031047	K11699	RNA-dependent RNA polymerase
MELO3C000914.2	0	0	0	0	0	0	0	0	0	0	0	0	0	0	0	0	0	0	chr00	20686838	20687228	-	84	-	GO:0000166;GO:0003774;GO:0003777;GO:0005524;GO:0005874;GO:0007018;GO:0008017	K11498	Kinesin-like protein
MELO3C000915.2	0	0	0	0	0	0	0	0	0	0	0	0	0	0	0	0	0	0	chr00	18970067	18970252	-	186	-	-	-	Unknown protein
MELO3C000916.2	0	0	0	0	0	0	0	0	0	0	0	0	0	0	0	0	0	0	chr00	20688707	20688869	+	163	-	GO:0016788	-	GDSL esterase/lipase
MELO3C000919.2	0	0	0	0	0	0	0	0	0	0	0	0	0	0	0	0	0	0	chr00	20428744	20429470	+	727	-	GO:0008152;GO:0008168;GO:0016740;GO:0032259	-	Methyltransferase type 11
MELO3C000920.2	1	0.349941	0	0	0	0	0	0	0	0	0	0	0	0	0	0	0	0	chr00	11223786	11223957	-	172	-	-	-	Unknown protein
MELO3C000922.2	0	0	1	0.158082	1	0.136979	0	0	4	0.667324	2	0.276614	2	0.33584	0	0	5	0.814305	chr00	20835716	20836267	-	384	-	GO:0003677;GO:0005634;GO:0006351;GO:0006355	-	NAC domain-containing protein, putative
MELO3C000923.2	2	0.271126	0	0	1	0.118468	0	0	0	0	0	0	0	0	0	0	1	0.140853	chr00	20856638	20857081	-	444	-	GO:0000166;GO:0003924;GO:0005525;GO:0005623;GO:0009055;GO:0015035;GO:0045454;GO:0055114	-	BnaA08g27600D protein
MELO3C000924.2	3	0.497437	1	0.167227	0	0	15	2.56808	5	0.882412	3	0.438925	7	1.24344	12	1.97548	2	0.344565	chr00	20825681	20826142	+	363	-	GO:0005506;GO:0006810;GO:0008137;GO:0009507;GO:0009535;GO:0009536;GO:0009579;GO:0016020;GO:0016491;GO:0016655;GO:0019684;GO:0046872;GO:0048038;GO:0051536;GO:0051539;GO:0055114	K05582	NAD(P)H-quinone oxidoreductase subunit K, chloroplastic
MELO3C000925.2	0	0	0	0	0	0	1	0.408865	0	0	0	0	0	0	0	0	2	0.822877	chr00	30764924	30765075	-	152	-	-	-	BnaA04g06320D protein
MELO3C000934.2	688	65.3165	724	69.3208	893	74.0877	2296	225.064	2227	225.029	2601	217.885	581	59.0909	673	63.4343	622	61.3549	chr00	21008874	21009507	+	634	-	GO:0004386	K12854	DExH-box ATP-dependent RNA helicase DExH12-like
MELO3C000936.2	0	0	0	0	0	0	0	0	0	0	0	0	0	0	0	0	0	0	chr00	20955693	20955931	-	239	-	-	-	Unknown protein
MELO3C000937.2	0	0	0	0	0	0	0	0	0	0	0	0	0	0	0	0	0	0	chr00	20162727	20163368	+	642	-	-	-	Unknown protein
MELO3C000951.2	28	2.92083	16	1.68329	41	3.73759	49	5.27769	35	3.88598	55	5.06248	45	5.02887	33	3.41772	55	5.96122	chr00	20478703	20479279	+	577	-	GO:0003677;GO:0003899;GO:0006351;GO:0009507;GO:0009536;GO:0016740;GO:0016779;GO:0046983	K03040	DNA-directed RNA polymerase subunit alpha
MELO3C000955.2	0	0	0	0	0	0	0	0	0	0	0	0	0	0	0	0	0	0	chr00	21140013	21140201	-	189	-	GO:0019904	K06630	14-3-3 protein, putative
MELO3C000960.2	110	13.1367	98	11.8035	135	14.0892	196	24.1685	209	26.5658	241	25.3958	59	7.54841	104	12.3311	72	8.93409	chr00	21169660	21171615	-	504	-	GO:0000408;GO:0002949;GO:0005737;GO:0016747	K01409	Peptidase_M22 domain-containing protein
MELO3C000962.2	0	0	0	0	0	0	0	0	0	0	0	0	0	0	0	0	0	0	chr00	21623460	21623645	+	186	-	GO:0003676	-	RNA-binding protein 24
MELO3C000965.2	0	0	1	0.150629	0	0	0	0	0	0	6	0.790719	0	0	0	0	2	0.310365	chr00	616335	616737	+	403	-	GO:0005739;GO:0005743;GO:0015078;GO:0015986;GO:0045263	K02126	ATP synthase subunit a
MELO3C000966.2	22	4.55044	25	5.21508	31	5.60341	79	16.8716	84	18.4924	100	18.2509	21	4.65329	33	6.77671	32	6.8771	chr00	21425468	21425936	-	291	-	GO:0005789;GO:0006506;GO:0016021	K05287	phosphatidylinositol-glycan biosynthesis class F protein-like
MELO3C000969.2	0	0	0	0	0	0	0	0	0	0	0	0	0	0	0	0	0	0	chr00	21685407	21685724	+	318	-	GO:0016020;GO:0016021	-	NBS-LRR type resistance protein
MELO3C000973.2	0	0	0	0	0	0	0	0	0	0	0	0	0	0	0	0	0	0	chr00	21326796	21327092	-	297	-	-	-	Unknown protein
MELO3C000977.2	0	0	0	0	0	0	0	0	0	0	0	0	0	0	0	0	0	0	chr00	21560745	21560900	+	156	-	-	-	Unknown protein
MELO3C000979.2	0	0	0	0	0	0	0	0	0	0	0	0	0	0	0	0	0	0	chr00	21624846	21625052	-	207	-	-	-	Unknown protein
MELO3C000980.2	0	0	0	0	0	0	0	0	0	0	0	0	0	0	0	0	0	0	chr00	21438347	21438730	-	384	-	GO:0008381;GO:0016021;GO:0034220	-	Bud13
MELO3C000985.2	8	0.544089	12	0.823099	5	0.297174	3	0.210669	4	0.289551	5	0.300056	3	0.218581	0	0	10	0.706651	chr00	21704189	21709024	+	885	-	GO:0004650;GO:0005975	K01184	polygalacturonase-like
MELO3C000986.2	0	0	0	0	0	0	0	0	0	0	0	0	0	0	0	0	0	0	chr00	21741818	21742279	+	462	-	-	-	Unknown protein
MELO3C000989.2	2	0.680112	5	1.71479	6	1.78304	3	1.05335	3	1.08581	3	0.900169	6	2.18581	4	1.35047	0	0	chr00	21875841	21876017	-	177	-	-	-	Unknown protein
MELO3C000990.2	0	0	0	0	0	0	0	0	0	0	0	0	0	0	0	0	0	0	chr00	23205897	23206209	-	283	-	-	-	Unknown protein
MELO3C000993.2	0	0	0	0	0	0	0	0	0	0	0	0	0	0	0	0	0	0	chr00	21842189	21842423	+	235	-	GO:0003676;GO:0003964;GO:0006278;GO:0015074	-	Reverse transcriptase
MELO3C000994.2	0	0	1	0.277185	1	0.240182	0	0	0	0	0	0	0	0	3	0.818607	0	0	chr00	21917893	21918111	+	219	-	GO:0004672;GO:0005509;GO:0005524;GO:0006468;GO:0016301;GO:0016310;GO:0030247	-	wall-associated receptor kinase 2-like
MELO3C000995.2	24	2.93014	19	2.33949	16	1.70709	15	1.8909	25	3.24864	30	3.23184	16	2.0927	16	1.93942	3	0.38056	chr00	21681968	21682460	-	493	-	GO:0005886;GO:0006754;GO:0006810;GO:0006811;GO:0009507;GO:0009535;GO:0009536;GO:0009579;GO:0015078;GO:0015986;GO:0015992;GO:0016020;GO:0016021;GO:0045263;GO:0046933	K02108	ATP synthase subunit a, chloroplastic
MELO3C001002.2	0	0	0	0	0	0	0	0	0	0	0	0	0	0	0	0	0	0	chr00	30219253	30219690	+	438	-	GO:0016020;GO:0016021	-	Leguminosin group486 secreted peptide
MELO3C001005.2	2	0.271738	5	0.685142	4	0.474942	0	0	0	0	0	0	1	0.145556	0	0	0	0	chr00	21948123	21948565	-	443	-	GO:0004497;GO:0005506;GO:0016020;GO:0016021;GO:0016491;GO:0016705;GO:0020037;GO:0046872;GO:0055114	K07408	Cytochrome P450
MELO3C001006.2	46	22.51	46	22.7021	50	21.382	26	13.1369	9	4.68754	24	10.3629	21	11.009	33	16.0327	46	23.3884	chr00	22060544	22060923	-	123	-	-	-	MACPF domain-containing protein
MELO3C001014.2	10	0.905111	1	0.0912836	5	0.395487	3	0.280364	0	0	2	0.159729	1	0.0969644	0	0	3	0.282129	chr00	22141424	22142366	-	665	-	GO:0005215;GO:0006810;GO:0016020	K14638	protein NRT1/ PTR FAMILY 4.6-like
MELO3C001017.2	5	0.621796	6	0.752524	3	0.326032	1	0.128404	0	0	0	0	3	0.399678	2	0.246935	6	0.775272	chr00	22136829	22138681	-	484	-	GO:0004525;GO:0006396;GO:0090501;GO:0090502	-	ribonuclease 3-like protein 2
MELO3C001037.2	0	0	0	0	0	0	0	0	0	0	0	0	0	0	0	0	0	0	chr00	22354908	22355176	+	269	-	GO:0005739	-	ORF-209
MELO3C001048.2	25	5.39336	45	9.7909	29	5.46736	29	6.45977	29	6.65889	25	4.75896	16	3.69785	42	8.99587	31	6.94874	chr00	22528857	22529135	+	279	-	GO:0016020;GO:0016021	-	F11F12.2 protein, putative
MELO3C001055.2	434	58.8343	417	57.0121	530	62.788	281	39.3321	367	52.953	405	48.4449	366	53.1535	460	61.9117	396	55.7777	chr00	41641043	41641486	+	444	-	GO:0008152;GO:0016491;GO:0016616;GO:0051287;GO:0055114	K15919	Glyoxylate reductase
MELO3C001056.2	0	0	0	0	0	0	0	0	0	0	0	0	0	0	0	0	0	0	chr00	22711724	22711952	+	229	-	GO:0003333;GO:0015171;GO:0016020;GO:0016021	-	Cationic amino acid transporter, putative
MELO3C001058.2	0	0	0	0	0	0	0	0	0	0	1	0.207461	0	0	0	0	0	0	chr00	11193346	11193601	+	256	-	GO:0006633;GO:0016491;GO:0016702;GO:0031408;GO:0046872;GO:0051213;GO:0055114	K15718	Lipoxygenase
MELO3C001063.2	0	0	0	0	0	0	0	0	0	0	0	0	0	0	0	0	0	0	chr00	22717288	22717530	+	243	-	GO:0016491;GO:0046872;GO:0051213;GO:0055114	-	2-oxoglutarate-dependent dioxygenase
MELO3C001065.2	53	14.2414	60	16.2599	75	17.6115	112	31.0737	55	15.7298	44	10.4323	58	16.6961	37	9.87079	73	20.3809	chr00	22696388	22696611	-	224	-	-	-	BnaA07g25870D protein
MELO3C001068.2	8	1.23466	3	0.466951	8	1.07897	40	6.3741	19	3.12102	27	3.67684	16	2.64539	20	3.06453	14	2.24498	chr00	22786675	22787064	-	390	-	GO:0005515	-	Octicosapeptide/Phox/Bem1p family protein
MELO3C001070.2	0	0	0	0	0	0	0	0	0	0	0	0	0	0	0	0	0	0	chr00	22751282	22751713	+	432	-	-	-	Unknown protein
MELO3C001077.2	0	0	0	0	0	0	0	0	0	0	0	0	0	0	0	0	0	0	chr00	22788234	22788416	-	183	-	-	-	Unknown protein
MELO3C001078.2	194	24.3775	291	36.8784	239	26.245	356	46.1889	239	31.9647	350	38.8069	141	18.9809	184	22.9552	148	19.323	chr00	22842277	22844259	+	479	-	-	-	Membrane insertase, putative (DUF1685)
MELO3C001082.2	0	0	0	0	0	0	0	0	0	0	0	0	0	0	0	0	0	0	chr00	22328759	22329033	-	275	-	GO:0009507;GO:0009536;GO:0016020;GO:0016021	-	Protein TIC 214
MELO3C001088.2	0	0	0	0	0	0	0	0	0	0	0	0	52	14.3292	9	2.2984	34	9.08681	chr00	23015852	23016085	+	234	-	GO:0006629;GO:0016491;GO:0055114;GO:0080019	K13356	Fatty acyl-CoA reductase
MELO3C001093.2	6	1.11808	0	0	5	0.814238	4	0.769628	2	0.396675	8	1.31542	4	0.79853	3	0.555031	2	0.387236	chr00	12581497	12581819	+	323	-	GO:0003677;GO:0003899;GO:0006351;GO:0009507;GO:0009536;GO:0016740;GO:0016779	K03046	DNA-directed RNA polymerase subunit beta''
MELO3C001094.2	0	0	0	0	0	0	0	0	0	0	0	0	0	0	0	0	0	0	chr00	30966375	30972701	+	248	-	-	-	Unknown protein
MELO3C001095.2	104	30.685	115	34.2202	119	30.6832	130	39.6038	152	47.7333	153	39.8325	77	24.3385	75	21.97	80	24.5249	chr00	23130521	23130724	-	204	-	-	-	Unknown protein
MELO3C001101.2	0	0	0	0	0	0	0	0	0	0	0	0	0	0	0	0	0	0	chr00	23225607	23225885	+	279	-	GO:0004672;GO:0005524;GO:0006468;GO:0016301;GO:0016310	-	Octicosapeptide/Phox/Bem1p
MELO3C001110.2	55	4.42573	70	5.68082	49	3.44571	15	1.24627	4	0.342583	13	0.923034	39	3.36199	28	2.23694	34	2.84266	chr00	23371507	23375162	+	748	-	GO:0000166;GO:0005524;GO:0006810;GO:0016020;GO:0016021;GO:0016887;GO:0042626;GO:0055085	K05658	ABC transporter B family protein
MELO3C001111.2	0	0	0	0	0	0	0	0	0	0	0	0	0	0	0	0	0	0	chr00	23400103	23400442	-	258	-	GO:0000165;GO:0000977;GO:0003677;GO:0003700;GO:0005634;GO:0006351;GO:0006355;GO:0045944;GO:0046983	K09264	MADS-box protein
MELO3C001113.2	0	0	0	0	0	0	0	0	0	0	0	0	0	0	0	0	0	0	chr00	23394148	23394344	-	197	-	GO:0000398;GO:0019013;GO:0030529;GO:0046540	K12843	U4/U6 small nuclear ribonucleoprotein Prp3
MELO3C001115.2	0	0	0	0	0	0	0	0	0	0	0	0	0	0	0	0	0	0	chr00	16517687	16517869	+	183	-	GO:0005524;GO:0008137;GO:0009507;GO:0016020;GO:0016021;GO:0042773;GO:0055114	-	NADH-plastoquinone oxidoreductase, chain 5 subgroup
MELO3C001120.2	0	0	0	0	0	0	0	0	0	0	0	0	0	0	0	0	0	0	chr00	23081484	23081774	+	291	-	GO:0005267;GO:0016020;GO:0071805	-	two-pore potassium channel 1 isoform X1
MELO3C001121.2	32	7.46541	33	7.76441	48	9.78601	31	7.46733	29	7.20089	43	8.85166	80	19.9942	63	14.5921	60	14.5439	chr00	22905416	22905906	-	258	-	GO:0003824;GO:0008483;GO:0009058;GO:0016740;GO:0030170	K07767	Aspartate aminotransferase
MELO3C001128.2	0	0	0	0	0	0	0	0	0	0	3	0.680897	0	0	0	0	0	0	chr00	23550089	23550506	+	234	-	-	-	DTW domain-containing protein
MELO3C001132.2	0	0	0	0	0	0	0	0	0	0	0	0	0	0	0	0	0	0	chr00	23580350	23580577	-	228	-	-	-	Unknown protein
MELO3C001148.2	23	3.18245	27	3.76781	40	4.83676	71	10.1436	32	4.71269	26	3.17439	95	14.0821	65	8.9294	81	11.6451	chr00	23713396	23714442	-	435	-	GO:0016491;GO:0055114;GO:0071949	-	FAD-dependent urate hydroxylase-like
MELO3C001150.2	13	1.54638	8	0.95974	37	3.84623	6	0.736926	0	0	1	0.10496	15	1.9115	36	4.25158	47	5.80892	chr00	23706484	23707067	-	506	-	GO:0016491;GO:0046872;GO:0051213;GO:0055114	-	Non-heme dioxygenase N-terminal domain-containing protein
MELO3C001156.2	48	6.78196	34	4.84489	79	9.75442	9	1.31297	14	2.10536	13	1.62073	45	6.81141	61	8.55694	39	5.72537	chr00	23888466	23888891	+	426	-	GO:0009536	-	At3g63390
MELO3C001158.2	0	0	0	0	0	0	0	0	0	0	0	0	0	0	0	0	0	0	chr00	24093616	24093786	-	171	-	-	-	Unknown protein
MELO3C001160.2	19	1.57305	6	0.500992	26	1.88115	0	0	0	0	0	0	13	1.15304	22	1.80837	23	1.97853	chr00	24071117	24074070	-	727	-	GO:0000166;GO:0003774;GO:0003777;GO:0005524;GO:0005874;GO:0007018;GO:0008017	-	Kinesin-like protein
MELO3C001161.2	0	0	0	0	0	0	0	0	0	0	0	0	0	0	0	0	0	0	chr00	24117020	24117331	-	312	-	-	-	Unknown protein
MELO3C001165.2	14	1.15117	16	1.32685	36	2.58687	24	2.03762	26	2.27546	31	2.24919	49	4.31637	58	4.73495	33	2.81936	chr00	24027679	24030127	+	732	-	GO:0001731;GO:0003743;GO:0005737;GO:0005852;GO:0006413;GO:0006446;GO:0016282;GO:0033290	K15030	eukaryotic translation initiation factor 3 subunit M
MELO3C001168.2	0	0	0	0	0	0	0	0	0	0	0	0	0	0	0	0	0	0	chr00	11457190	11457345	+	156	-	GO:0003735;GO:0005622;GO:0005840;GO:0006412	K02953	40S ribosomal protein S13
MELO3C001173.2	0	0	0	0	0	0	0	0	0	0	0	0	0	0	0	0	0	0	chr00	24014518	24014943	-	333	-	GO:0016020;GO:0016021	-	IQ domain-containing protein IQM1
MELO3C001174.2	14	3.15602	8	1.81883	20	3.94006	17	3.95695	21	5.03867	28	5.56959	18	4.34706	11	2.46195	16	3.74763	chr00	24132825	24133091	-	267	-	GO:0000166;GO:0005524;GO:0009507;GO:0009536;GO:0009570;GO:0016020;GO:0016021	-	Protein Ycf2
MELO3C001175.2	97	10.9951	90	10.2887	120	11.887	54	6.32008	61	7.35941	62	6.20117	94	11.4148	117	13.1671	106	12.4842	chr00	24154565	24169182	+	531	-	GO:0016740	K00799	Glutathione s-transferase
MELO3C001187.2	79	8.78928	92	10.323	88	8.55597	157	18.0354	138	16.3414	187	18.3578	122	14.5411	93	10.2727	145	16.7617	chr00	24233191	24234270	+	541	-	GO:0003723;GO:0003735;GO:0005622;GO:0005840;GO:0006412;GO:0009507;GO:0009536;GO:0019843;GO:0030529	K02948	30S ribosomal protein S11, chloroplastic
MELO3C001202.2	2	0.254503	3	0.385012	0	0	41	5.38699	31	4.19864	31	3.48078	6	0.817945	3	0.379017	7	0.925519	chr00	24734776	24735248	+	473	-	GO:0003714;GO:0005515;GO:0005634;GO:0006351;GO:0006355;GO:0006952;GO:0009611;GO:0031347;GO:1903507;GO:2000022	-	Protein TIFY 5A
MELO3C001206.2	0	0	0	0	1	0.129556	1	0.153073	0	0	0	0	0	0	2	0.294376	0	0	chr00	24699797	24700202	+	406	-	GO:0006810;GO:0009734;GO:0016020;GO:0016021;GO:0055085	K13947	Auxin efflux carrier component
MELO3C001210.2	0	0	0	0	0	0	0	0	0	0	0	0	0	0	0	0	0	0	chr09	19373718	19373873	-	156	-	-	-	Unknown protein
MELO3C001212.2	0	0	0	0	0	0	0	0	0	0	0	0	0	0	0	0	0	0	chr00	27807260	27809502	-	495	-	GO:0004672;GO:0005524;GO:0006468;GO:0016301;GO:0016310	K08819	Protein kinase superfamily protein
MELO3C001216.2	0	0	0	0	0	0	0	0	0	0	0	0	0	0	0	0	0	0	chr00	24849791	24850171	-	288	-	GO:0004672;GO:0005524;GO:0006468;GO:0016020;GO:0016021;GO:0016301;GO:0016310	-	Receptor-like protein kinase
MELO3C001220.2	0	0	0	0	0	0	0	0	0	0	0	0	0	0	0	0	0	0	chr00	23825819	23826295	+	477	-	-	-	Unknown protein
MELO3C001224.2	3	0.524912	5	0.882319	1	0.152906	15	2.70992	12	2.23476	21	3.24218	0	0	0	0	1	0.181798	chr00	24957267	24957610	+	344	-	GO:0008152;GO:0016740;GO:0016757;GO:0016758	-	Glycosyltransferase
MELO3C001225.2	0	0	0	0	0	0	0	0	0	0	0	0	1	0.127686	0	0	0	0	chr00	12072769	12074773	-	505	-	GO:0000166;GO:0003989;GO:0005524;GO:0006629;GO:0006631;GO:0006633;GO:0008270;GO:0009317;GO:0009507;GO:0009536;GO:0009570;GO:0016740;GO:0016874;GO:0046872;GO:2001295	K01963	Acetyl-coenzyme A carboxylase carboxyl transferase subunit beta, chloroplastic
MELO3C001230.2	0	0	0	0	0	0	0	0	0	0	0	0	0	0	0	0	0	0	chr00	25241910	25242308	+	399	-	-	-	Unknown protein
MELO3C001232.2	0	0	0	0	0	0	0	0	0	0	0	0	0	0	0	0	0	0	chr00	25000148	25000366	+	219	-	-	-	Unknown protein
MELO3C001234.2	3	0.582483	6	1.17491	10	1.69677	25	5.01189	11	2.27321	33	5.65364	38	7.90416	45	8.67459	75	15.1303	chr00	25202124	25202433	+	310	-	GO:0006810;GO:0008271;GO:0008272;GO:0009507;GO:0015116;GO:0016020;GO:0016021;GO:0055085;GO:1902358	K17471	Sulfate transporter 3.1
MELO3C001235.2	5	1.79137	1	0.361331	0	0	3	1.10978	17	6.48257	17	5.37422	1	0.383817	1	0.355704	2	0.744507	chr00	25209650	25209962	+	168	-	GO:0006855;GO:0015238;GO:0015297;GO:0016020;GO:0016021;GO:0055085	K03327	Protein DETOXIFICATION
MELO3C001238.2	4	0.472078	5	0.595133	6	0.618821	4	0.487431	1	0.125614	4	0.416549	10	1.26434	10	1.17173	8	0.980998	chr00	25270329	25272300	+	510	-	GO:0008152;GO:0016740;GO:0016758	-	anthocyanidin 3-O-glucosyltransferase 2-like
MELO3C001244.2	0	0	0	0	0	0	0	0	2	0.280978	3	0.349408	0	0	0	0	0	0	chr00	25157253	25158889	-	456	-	-	-	Unknown protein
MELO3C001245.2	0	0	0	0	0	0	0	0	0	0	0	0	0	0	0	0	0	0	chr00	25160140	25160445	-	306	-	-	-	glial fibrillary acidic protein-like
MELO3C001246.2	0	0	0	0	0	0	0	0	0	0	0	0	0	0	0	0	0	0	chr00	24133633	24133785	-	153	-	-	-	Unknown protein
MELO3C001251.2	0	0	0	0	0	0	1	0.406193	0	0	0	0	0	0	0	0	0	0	chr00	25353491	25353643	+	153	-	-	-	Unknown protein
MELO3C001253.2	0	0	0	0	0	0	0	0	0	0	0	0	0	0	0	0	0	0	chr00	13071349	13071552	-	204	-	GO:0016020;GO:0016021	-	Amino acid permease
MELO3C001258.2	0	0	0	0	0	0	2	0.422772	0	0	0	0	0	0	0	0	0	0	chr00	25547100	25547393	-	294	-	GO:0005215;GO:0006810;GO:0016020	K14638	protein NRT1/ PTR FAMILY 5.2-like
MELO3C001259.2	0	0	0	0	0	0	0	0	0	0	0	0	0	0	0	0	0	0	chr00	25553349	25554587	+	1080	-	GO:0004553;GO:0005975;GO:0008152;GO:0016787;GO:0016798	K01179	Glycosyl hydrolase family 5 protein
MELO3C001266.2	0	0	0	0	0	0	0	0	0	0	0	0	0	0	0	0	2	0.563411	chr00	25621018	25621239	-	222	-	GO:0001731;GO:0003723;GO:0003743;GO:0005737;GO:0005852;GO:0006413;GO:0006446;GO:0016282;GO:0033290	K03254	eukaryotic translation initiation factor 3 subunit A-like
MELO3C001268.2	8	1.12504	2	0.283662	8	0.983173	5	0.726022	1	0.14968	3	0.372266	12	1.80789	5	0.698111	1	0.146118	chr00	16241489	16241916	-	428	-	GO:0003677;GO:0003899;GO:0006351;GO:0009507;GO:0009536;GO:0016740;GO:0016779	K03046	DNA-directed RNA polymerase subunit beta''
MELO3C001272.2	0	0	0	0	0	0	0	0	0	0	0	0	0	0	0	0	0	0	chr00	13644993	13645517	-	525	-	GO:0004857;GO:0043086;GO:0046910	-	pectinesterase inhibitor-like
MELO3C001274.2	78	11.7664	6	0.912836	19	2.50475	36	5.60729	11	1.76615	15	1.99662	282	45.5733	142	21.2674	156	24.4512	chr00	25803065	25803463	-	399	-	GO:0016020;GO:0016021	K15104	mitochondrial uncoupling protein 5-like
MELO3C001276.2	27	9.67338	32	11.5626	26	8.14044	7	2.58948	8	3.05062	17	5.37422	29	11.1307	35	12.4496	32	11.9121	chr00	25049861	25050028	+	168	-	-	-	Unknown protein
MELO3C001279.2	0	0	0	0	0	0	0	0	0	0	0	0	0	0	0	0	0	0	chr00	5368261	5368526	-	266	-	GO:0016020;GO:0016021	-	NBS-LRR type resistance protein
MELO3C001286.2	0	0	0	0	0	0	0	0	0	0	0	0	0	0	0	0	0	0	chr00	23395351	23395678	+	328	-	-	K01255	Unknown protein
MELO3C001290.2	0	0	0	0	0	0	0	0	0	0	0	0	0	0	0	0	0	0	chr00	27609316	27609678	+	363	-	-	-	Unknown protein
MELO3C001295.2	0	0	0	0	0	0	0	0	0	0	0	0	0	0	0	0	0	0	chr00	25934194	25946264	-	921	-	-	-	Unknown protein
MELO3C001297.2	0	0	0	0	0	0	0	0	0	0	0	0	0	0	0	0	0	0	chr00	25709151	25709475	+	325	-	-	-	Unknown protein
MELO3C001302.2	0	0	0	0	0	0	0	0	0	0	0	0	0	0	0	0	0	0	chr00	26217035	26217287	+	253	-	-	-	Unknown protein
MELO3C001303.2	49	3.03739	39	2.43815	46	2.49185	44	2.81616	32	2.11124	54	2.95359	79	5.24616	75	4.61573	82	5.28133	chr00	26058045	26060597	-	971	-	GO:0004252;GO:0006508;GO:0008233	K15032	Subtilisin-like protease
MELO3C001305.2	0	0	0	0	0	0	0	0	0	0	0	0	0	0	0	0	0	0	chr00	26099013	26099496	-	398	-	GO:0000166;GO:0005524;GO:0006508;GO:0008233;GO:0008568;GO:0016787	K03066	26S protease regulatory subunit, putative
MELO3C001307.2	20	8.02532	26	10.522	10	3.50665	8	3.31453	16	6.8334	19	6.72726	15	6.44813	18	7.171	26	10.84	chr00	24034073	24034339	-	150	-	-	K15728	Phosphatidate phosphatase PAH2
MELO3C001309.2	0	0	0	0	0	0	0	0	2	0.286636	0	0	3	0.432761	1	0.133687	1	0.139907	chr00	25881797	25882243	+	447	-	GO:0003723;GO:0003735;GO:0005622;GO:0005840;GO:0006412;GO:0009507;GO:0009536;GO:0019843;GO:0030529	K02963	30S ribosomal protein S18, chloroplastic
MELO3C001310.2	0	0	2	0.532487	0	0	0	0	0	0	0	0	0	0	0	0	0	0	chr00	26202122	26202349	+	228	-	GO:0030246	-	Protein PHLOEM PROTEIN 2-LIKE A9
MELO3C001315.2	0	0	0	0	0	0	0	0	1	0.374638	0	0	0	0	0	0	0	0	chr00	26730187	26730357	+	171	-	-	-	Unknown protein
MELO3C001317.2	138	51.2729	97	36.3472	148	48.0541	123	47.186	149	58.9222	154	50.4873	69	27.4643	102	37.6256	100	38.6041	chr00	13960234	13960563	-	162	-	-	-	Coiled-coil protein (DUF572)
MELO3C001319.2	0	0	0	0	0	0	0	0	0	0	0	0	0	0	0	0	0	0	chr00	26472146	26472331	+	186	-	-	-	Unknown protein
MELO3C001321.2	0	0	0	0	0	0	0	0	0	0	0	0	0	0	0	0	3	0.443536	chr00	26434194	26434616	+	423	-	-	-	Unknown protein
MELO3C001323.2	33	10.0316	22	6.74484	40	10.6262	22	6.90527	27	8.73587	24	6.43757	32	10.4212	30	9.05429	59	18.6352	chr00	26446732	26446929	-	198	-	GO:0016021	-	transmembrane protein 184C
MELO3C001327.2	0	0	0	0	0	0	0	0	0	0	0	0	0	0	0	0	0	0	chr00	26440138	26440292	-	155	-	-	K03881	Unknown protein
MELO3C001328.2	0	0	0	0	0	0	0	0	0	0	0	0	0	0	0	0	0	0	chr00	27097313	27097645	+	333	-	GO:0006914;GO:0030242	-	Retrovirus-related Pol polyprotein LINE-1
MELO3C001330.2	1	0.188683	0	0	0	0	1	0.19482	2	0.401649	2	0.332978	1	0.202136	1	0.18733	1	0.196046	chr00	16232402	16232720	+	319	-	GO:0004129;GO:0005507;GO:0016020;GO:0046872;GO:1902600	-	Copper centre Cu(A)
MELO3C001332.2	0	0	0	0	0	0	0	0	0	0	0	0	0	0	0	0	0	0	chr00	21580960	21581533	+	574	-	GO:0004857;GO:0043086;GO:0046910	-	pectinesterase inhibitor-like
MELO3C001335.2	0	0	0	0	0	0	0	0	0	0	0	0	0	0	0	0	0	0	chr00	601831	602073	-	243	-	-	-	Cytochrome b reductase 1
MELO3C001336.2	0	0	0	0	0	0	0	0	0	0	0	0	0	0	0	0	0	0	chr08	22303556	22314139	-	597	-	GO:0009058	-	Anthranilate synthase component I-2
MELO3C001345.2	10	2.82582	4	1.13997	7	1.72863	2	0.583544	0	0	0	0	6	1.81638	8	2.24444	14	4.11052	chr00	26724011	26724223	+	213	-	GO:0006520;GO:0030170	K01733	threonine synthase, chloroplastic-like
MELO3C001347.2	28	8.02532	26	7.51568	20	5.0095	14	4.14316	9	2.74556	11	2.78195	42	12.8963	33	9.39059	38	11.3165	chr00	26806911	26807120	-	210	-	-	K14786	Unknown protein
MELO3C001348.2	0	0	0	0	0	0	0	0	0	0	0	0	0	0	0	0	0	0	chr00	26773855	26774666	-	483	-	GO:0019864	-	Major pollen allergen Ole e 6
MELO3C001351.2	0	0	0	0	0	0	0	0	0	0	0	0	0	0	0	0	0	0	chr00	26352537	26352854	-	318	-	GO:0016020;GO:0016021	-	NBS-LRR type resistance protein
MELO3C001352.2	10	0.972373	19	1.86328	31	2.63424	21	2.1084	20	2.06989	15	1.28699	13	1.35421	17	1.64118	8	0.808254	chr00	16240404	16241158	-	619	-	GO:0003735;GO:0005622;GO:0005840;GO:0006412;GO:0009507;GO:0009536;GO:0015935;GO:0030529	K02967	30S ribosomal protein S2, chloroplastic
MELO3C001354.2	3	0.607979	7	1.43072	2	0.354207	3	0.627752	9	1.94131	8	1.43057	2	0.434218	3	0.603619	5	1.05284	chr00	26869043	26869339	-	297	-	GO:0004672;GO:0004675;GO:0005524;GO:0005886;GO:0006468;GO:0007166;GO:0007178;GO:0016020;GO:0016021;GO:0016301;GO:0016310	-	Kinase family protein
MELO3C001356.2	0	0	0	0	0	0	0	0	0	0	0	0	0	0	0	0	0	0	chr00	27022593	27022772	-	180	-	-	-	Unknown protein
MELO3C001358.2	0	0	0	0	0	0	0	0	0	0	0	0	0	0	0	0	0	0	chr07	5383604	5383912	+	264	-	GO:0003735;GO:0005622;GO:0005840;GO:0006412;GO:0009507;GO:0009536;GO:0015935;GO:0030529	K02967	30S ribosomal protein S2, chloroplastic
MELO3C001359.2	0	0	0	0	0	0	0	0	0	0	0	0	0	0	0	0	0	0	chr00	27119987	27120286	+	300	-	-	-	Unknown protein
MELO3C001363.2	21	4.71637	39	8.83373	43	8.43952	5	1.15947	12	2.8685	10	1.98172	24	5.77445	27	6.02043	32	7.4673	chr00	27084590	27084857	+	268	-	GO:0006810;GO:0015031;GO:0016020;GO:0016021;GO:0016192	-	Vesicle transport protein
MELO3C001364.2	0	0	2	0.709983	3	0.922803	3	1.09031	0	0	4	1.24234	1	0.377084	1	0.349464	2	0.731446	chr00	27108966	27109136	+	171	-	GO:0009507	-	BEACH domain-containing protein A2
MELO3C001365.2	0	0	0	0	0	0	0	0	0	0	0	0	0	0	0	0	0	0	chr00	27121899	27122072	-	174	-	-	-	Unknown protein
MELO3C001366.2	0	0	0	0	0	0	0	0	0	0	0	0	0	0	0	0	0	0	chr00	27155182	27155412	+	231	-	-	-	Unknown protein
MELO3C001368.2	62	4.49611	118	8.63015	63	3.99251	274	20.5161	350	27.0146	310	19.8363	55	4.27286	59	4.24788	53	3.99343	chr00	27171053	27175853	-	830	-	-	-	Unknown protein
MELO3C001373.2	0	0	0	0	0	0	0	0	0	0	0	0	0	0	0	0	0	0	chr00	27241434	27241619	-	186	-	-	-	Unknown protein
MELO3C001376.2	0	0	0	0	0	0	0	0	0	0	0	0	0	0	0	0	0	0	chr00	27322662	27322831	+	170	-	-	-	Unknown protein
MELO3C001377.2	0	0	0	0	0	0	0	0	0	0	0	0	0	0	0	0	0	0	chr00	27252491	27255818	+	552	-	GO:0004650;GO:0005975	K01213	exopolygalacturonase-like
MELO3C001380.2	284	79.1386	248	69.6967	313	76.221	98	28.1965	110	32.6247	120	29.5055	211	62.9887	254	70.2713	194	56.1689	chr00	27352638	27352853	+	216	-	GO:0004177;GO:0006508;GO:0008233;GO:0008237;GO:0008270;GO:0016787;GO:0046872	K01267	Aspartyl aminopeptidase
MELO3C001387.2	0	0	3	0.526332	2	0.304045	3	0.538851	0	0	3	0.460491	0	0	0	0	2	0.361495	chr00	18570883	18571228	-	346	-	GO:0006754;GO:0006810;GO:0006811;GO:0008289;GO:0009507;GO:0009535;GO:0009536;GO:0009579;GO:0015078;GO:0015986;GO:0015991;GO:0015992;GO:0016020;GO:0016021;GO:0033177;GO:0045263;GO:0046933	K02110	ATP synthase subunit c, chloroplastic
MELO3C001388.2	13	3.97192	26	8.01164	24	6.4081	155	48.8977	156	50.7302	205	55.2667	36	11.7834	33	10.0103	18	5.71419	chr00	27494699	27494895	+	197	-	GO:0051087	-	BAG family molecular chaperone regulator
MELO3C001390.2	0	0	0	0	0	0	0	0	0	0	0	0	0	0	0	0	0	0	chr00	27418513	27418858	-	346	-	GO:0016874	K10143	Ubiquitin ligase protein cop1
MELO3C001392.2	441	121.204	440	121.962	468	112.405	1246	353.588	1331	389.351	1618	392.383	733	215.821	795	216.931	1017	290.419	chr00	27509170	27509388	-	219	-	GO:0005215;GO:0005743;GO:0006810;GO:0016020;GO:0016021;GO:0055085	K05863	Adp,atp carrier protein, mitochondrial
MELO3C001395.2	0	0	0	0	0	0	0	0	0	0	0	0	0	0	0	0	0	0	chr00	27478161	27478352	+	192	-	-	-	Unknown protein
MELO3C001396.2	0	0	0	0	0	0	0	0	0	0	0	0	0	0	0	0	0	0	chr00	9015645	9015974	+	330	-	GO:0016787	-	Serine/threonine-protein phosphatase 7 long form-like protein
MELO3C001398.2	1	0.0671013	3	0.203022	3	0.175919	5	0.346418	5	0.357096	9	0.532876	1	0.0718855	3	0.199861	9	0.627478	chr00	27555098	27570986	-	897	-	GO:0016491;GO:0055114	K00574	Cyclopropane-fatty-acyl-phospholipid synthase
MELO3C001403.2	0	0	0	0	0	0	0	0	0	0	0	0	0	0	0	0	0	0	chr00	27492648	27492921	+	274	-	-	-	Unknown protein
MELO3C001405.2	6	1.852	3	0.933901	5	1.34871	9	2.86834	8	2.62823	5	1.36179	10	3.30673	10	3.06453	14	4.48995	chr00	27244911	27245105	-	195	-	GO:0003676;GO:0003723	K14945	KH domain-containing family protein
MELO3C001406.2	790	20.728	754	19.9523	900	20.6364	401	10.8636	352	9.83008	526	12.1778	669	18.8047	752	19.5895	645	17.5839	chr07	23327124	23332843	+	2294	-	GO:0004222;GO:0005524;GO:0006508;GO:0008233;GO:0008237;GO:0016020;GO:0016021	-	ATP-dependent zinc metalloprotease FtsH
MELO3C001407.2	0	0	0	0	0	0	0	0	0	0	0	0	0	0	0	0	0	0	chr00	185158	185346	+	189	-	-	-	Unknown protein
MELO3C001415.2	2	0.280606	0	0	1	0.12261	0	0	3	0.447994	0	0	4	0.601224	7	0.975077	0	0	chr00	19584470	19584898	-	429	-	GO:0003723;GO:0003735;GO:0005622;GO:0005840;GO:0006412;GO:0009507;GO:0009536;GO:0015934;GO:0016740;GO:0019843;GO:0030529	K02886	50S ribosomal protein L2, chloroplastic
MELO3C001419.2	4	1.19781	3	0.906023	2	0.523381	408	126.15	203	64.7005	187	49.4108	270	86.6167	136	40.4335	346	107.654	chr00	27964645	27964892	-	201	-	GO:0000166;GO:0005524	K08900	Aaa-atpase
MELO3C001427.2	0	0	0	0	0	0	0	0	0	0	0	0	0	0	0	0	0	0	chr00	28268181	28268473	+	206	-	GO:0005507;GO:0016491;GO:0055114	-	L-ascorbate oxidase homolog
MELO3C001430.2	0	0	0	0	0	0	0	0	0	0	0	0	0	0	0	0	0	0	chr02	17507998	17509490	+	1203	-	GO:0004650;GO:0005576;GO:0005975;GO:0008152;GO:0016020;GO:0016021;GO:0016787;GO:0016798;GO:0071555	K01184	Polygalacturonase
MELO3C001454.2	0	0	0	0	0	0	0	0	2	0.758143	0	0	0	0	0	0	0	0	chr09	19352508	19352676	-	169	-	-	-	Unknown protein
MELO3C001461.2	0	0	0	0	0	0	1	0.178585	0	0	0	0	1	0.185291	11	1.88891	1	0.179709	chr00	28730326	28730673	-	348	-	GO:0004097;GO:0008152;GO:0016491;GO:0046148;GO:0046872;GO:0055114	K00422	Polyphenol oxidase
MELO3C001462.2	118	36.0528	123	37.9012	159	42.4536	112	35.3326	102	33.1697	169	45.5614	163	53.3526	194	58.8483	143	45.3961	chr00	28728456	28728786	+	197	-	-	K14272	Unknown protein
MELO3C001466.2	399	21.8524	318	17.5648	433	20.724	139	7.86032	159	9.26845	184	8.89193	332	19.4793	357	19.4119	302	17.1853	chr08	5881895	5887825	+	1099	-	GO:0003735;GO:0005622;GO:0005840;GO:0006412;GO:0006810;GO:0016020;GO:0016021	K15115	Mitochondrial folate transporter/carrier
MELO3C001469.2	0	0	0	0	0	0	0	0	0	0	0	0	0	0	0	0	0	0	chr00	28734203	28734385	+	183	-	-	-	Unknown protein
MELO3C001482.2	0	0	0	0	0	0	0	0	0	0	0	0	0	0	0	0	0	0	chr00	29107586	29107792	+	207	-	-	-	Unknown protein
MELO3C001489.2	0	0	0	0	0	0	0	0	0	0	0	0	0	0	0	0	0	0	chr00	29037580	29037933	-	354	-	GO:0000287;GO:0008152;GO:0010333;GO:0016829	-	terpene synthase 10-like
MELO3C001492.2	0	0	0	0	0	0	0	0	0	0	0	0	0	0	0	0	0	0	chr00	26451443	26451798	+	356	-	-	-	Unknown protein
MELO3C001494.2	0	0	0	0	0	0	0	0	0	0	0	0	0	0	0	0	0	0	chr00	29068716	29068907	-	192	-	GO:0005618;GO:0016787;GO:0030599;GO:0042545;GO:0045330;GO:0045490	K01051	Pectinesterase
MELO3C001497.2	0	0	0	0	0	0	0	0	0	0	0	0	0	0	0	0	0	0	chr00	29127612	29127953	-	342	-	-	-	Unknown protein
MELO3C001500.2	0	0	1	0.11037	0	0	0	0	0	0	0	0	0	0	0	0	1	0.113707	chr09	8396816	8397570	+	550	-	GO:0016853;GO:0016866	K15813	Terpene cyclase/mutase family member
MELO3C001501.2	0	0	0	0	0	0	0	0	0	0	0	0	0	0	0	0	0	0	chr00	16050920	16051161	-	242	-	GO:0005783;GO:0006886;GO:0016020;GO:0016021	K14009	B-cell receptor-associated protein 31-like
MELO3C001502.2	26	6.95528	18	4.85629	33	7.71463	8	2.20969	5	1.42362	3	0.708133	16	4.58534	17	4.51507	25	6.94874	chr00	21486870	21487191	-	225	-	GO:0006810;GO:0015031;GO:0016020;GO:0016021;GO:0016192	-	Vesicle transport protein
MELO3C001504.2	0	0	3	0.788358	5	1.13852	0	0	0	0	0	0	0	0	1	0.258694	2	0.54146	chr00	608503	608733	-	231	-	-	-	Unknown protein
MELO3C001510.2	28	2.98815	13	1.3992	20	1.86524	0	0	0	0	0	0	14	1.6006	7	0.741681	14	1.55238	chr04	27453715	27456265	-	564	-	GO:0005769;GO:0005886;GO:0015095;GO:0015693;GO:0016021;GO:1903830	-	Magnesium transporter NIPA
MELO3C001514.2	46	11.5364	40	10.1173	22	4.82165	34	8.80422	48	12.8126	49	10.8433	55	14.777	51	12.6986	49	12.7683	chr00	29392373	29392612	-	240	-	GO:0003735;GO:0005622;GO:0005840;GO:0006412;GO:0009507;GO:0009536;GO:0030529	K02913	50S ribosomal protein L33, chloroplastic
MELO3C001516.2	28	4.60469	26	4.31228	55	7.90434	38	6.45247	21	3.67575	24	3.48262	33	5.81389	38	6.20441	20	3.41741	chr00	29362135	29362500	+	366	-	-	-	Unknown protein
MELO3C001521.2	0	0	0	0	0	0	0	0	0	0	1	0.057854	0	0	1	0.0650962	1	0.0681249	chr00	29152253	29157412	-	918	-	GO:0016491;GO:0047560;GO:0055114	-	Estradiol 17-beta-dehydrogenase 1
MELO3C001541.2	0	0	0	0	0	0	0	0	0	0	0	0	0	0	0	0	0	0	chr00	31791655	31791887	-	233	-	-	-	Unknown protein
MELO3C001545.2	0	0	0	0	0	0	0	0	0	0	0	0	0	0	0	0	0	0	chr00	29861143	29861379	-	237	-	GO:0003677;GO:0046983	-	BHLH transcription factor
MELO3C001553.2	4	1.02889	5	1.29708	0	0	1	0.265587	2	0.547548	2	0.453931	1	0.275561	7	1.78764	3	0.801777	chr00	29632532	29632765	+	234	-	-	-	Unknown protein
MELO3C001555.2	0	0	0	0	0	0	0	0	0	0	0	0	0	0	0	0	0	0	chr00	29913775	29914107	+	333	-	-	-	Unknown protein
MELO3C001556.2	60	12.6273	48	10.188	59	10.851	34	7.38816	98	21.9517	104	19.3127	45	10.1457	61	12.7456	41	8.96533	chr00	30003706	30004065	-	286	-	GO:0005622;GO:0019013;GO:0019843;GO:0030529	K14560	U3 small nucleolar ribonucleoprotein protein IMP3
MELO3C001561.2	7	1.60201	0	0	5	0.999996	0	0	0	0	1	0.201939	0	0	0	0	0	0	chr00	30149998	30150260	-	263	-	-	-	Unknown protein
MELO3C001566.2	0	0	0	0	0	0	0	0	0	0	0	0	0	0	0	0	0	0	chr10	24887967	24888139	-	173	-	GO:0006754;GO:0006810;GO:0006811;GO:0008289;GO:0009507;GO:0009535;GO:0009536;GO:0009579;GO:0015078;GO:0015986;GO:0015991;GO:0015992;GO:0016020;GO:0016021;GO:0033177;GO:0045263;GO:0046933	K02110	ATP synthase subunit c, chloroplastic
MELO3C001567.2	0	0	0	0	0	0	0	0	0	0	0	0	0	0	0	0	0	0	chr00	34235667	34235852	+	186	-	-	-	Unknown protein
MELO3C001571.2	0	0	0	0	0	0	0	0	0	0	0	0	0	0	0	0	0	0	chr00	30306862	30307099	+	238	-	-	-	Unknown protein
MELO3C001574.2	0	0	0	0	0	0	0	0	0	0	0	0	0	0	0	0	0	0	chr06	17701567	17704012	+	846	-	GO:0006508;GO:0008233;GO:0008234	-	Ulp1 protease family, carboxy-terminal domain protein
MELO3C001577.2	0	0	0	0	0	0	0	0	0	0	0	0	0	0	0	0	0	0	chr00	30420632	30420808	+	177	-	-	-	Unknown protein
MELO3C001580.2	0	0	0	0	0	0	0	0	1	0.222441	0	0	0	0	0	0	0	0	chr00	29842334	29842621	+	288	-	-	-	Unknown protein
MELO3C001586.2	0	0	0	0	0	0	0	0	0	0	0	0	0	0	0	0	0	0	chr00	30471395	30471752	+	358	-	-	-	GATA zinc finger domain-containing protein 10-like isoform X2
MELO3C001590.2	0	0	0	0	0	0	0	0	0	0	0	0	0	0	0	0	0	0	chr00	30182672	30182851	-	180	-	-	-	Unknown protein
MELO3C001593.2	20	1.58603	18	1.43961	34	2.35625	2	0.163761	1	0.0844046	2	0.139947	32	2.71858	22	1.73212	22	1.81271	chr00	30582969	30586225	-	759	-	GO:0016020;GO:0016021	-	F-box plant-like protein, putative
MELO3C001595.2	9	2.61695	11	3.22579	3	0.762316	14	4.20321	16	4.95174	18	4.61826	6	1.86902	2	0.577375	5	1.51059	chr00	23447116	23447322	-	207	-	GO:0000287;GO:0009055;GO:0009507;GO:0009522;GO:0009535;GO:0009536;GO:0009579;GO:0015979;GO:0016020;GO:0016021;GO:0016168;GO:0016491;GO:0018298;GO:0046872;GO:0051536;GO:0051539;GO:0055114	K02689	Photosystem I P700 chlorophyll a apoprotein A1
MELO3C001601.2	0	0	0	0	0	0	0	0	0	0	0	0	0	0	0	0	0	0	chr00	30669897	30670123	+	227	-	GO:0004252;GO:0006508;GO:0008233;GO:0016787	-	Subtilisin-like protease
MELO3C001609.2	0	0	0	0	0	0	0	0	0	0	0	0	0	0	0	0	0	0	chr00	30778694	30778852	+	159	-	GO:0016787	K13051	Isoaspartyl peptidase/L-asparaginase
MELO3C001612.2	0	0	0	0	0	0	0	0	0	0	0	0	0	0	0	0	0	0	chr11	7491041	7491282	+	242	-	GO:0005783;GO:0006886;GO:0016020;GO:0016021	K14009	B-cell receptor-associated protein 31-like
MELO3C001614.2	152	42.9524	126	35.9092	221	54.5754	135	39.3892	212	63.7623	179	44.6323	156	47.2258	385	108.014	263	77.219	chr00	30752382	30752594	-	213	-	GO:0005737	K13993	Class I heat shock protein
MELO3C001616.2	0	0	0	0	0	0	0	0	0	0	0	0	0	0	0	0	1	0.236889	chr11	22349818	22350081	-	264	-	GO:0004842;GO:0016567;GO:0016740	-	U-box domain-containing protein 7
MELO3C001621.2	0	0	0	0	0	0	0	0	0	0	0	0	0	0	0	0	0	0	chr00	30885992	30886225	+	234	-	GO:0003682;GO:0007064;GO:0008270;GO:0010468;GO:0046872	K06672	PHD finger family protein
MELO3C001633.2	0	0	0	0	0	0	0	0	0	0	0	0	0	0	0	0	0	0	chr00	31234075	31234389	-	315	-	-	K00423	Unknown protein
MELO3C001635.2	0	0	0	0	0	0	0	0	0	0	0	0	0	0	0	0	0	0	chr00	31294350	31294517	+	168	-	-	-	Unknown protein
MELO3C001637.2	6	2.00633	2	0.674484	4	1.16888	0	0	2	0.711812	0	0	3	1.07469	9	2.98791	6	2.08462	chr00	31307048	31307227	-	180	-	-	-	Unknown protein
MELO3C001641.2	0	0	0	0	0	0	0	0	0	0	0	0	0	0	0	0	0	0	chr00	31420888	31421130	-	243	-	GO:0003723;GO:0004519;GO:0009451;GO:0043231;GO:0090305	-	Pentatricopeptide repeat-containing protein At2g17670
MELO3C001644.2	0	0	0	0	0	0	0	0	0	0	0	0	0	0	0	0	0	0	chr00	31380234	31380503	-	270	-	GO:0016020;GO:0016021	-	NBS-LRR type resistance protein
MELO3C001650.2	6	1.69549	7	1.99495	3	0.740842	57	16.631	56	16.8429	45	11.2204	4	1.21092	5	1.40278	4	1.17443	chr00	31540377	31540694	+	213	-	GO:0005886;GO:0006810;GO:0008643;GO:0016020;GO:0016021	K15382	Bidirectional sugar transporter SWEET
MELO3C001651.2	0	0	0	0	0	0	0	0	0	0	0	0	0	0	0	0	0	0	chr00	31390693	31390935	-	243	-	-	-	glutamic acid-rich protein isoform X2
MELO3C001656.2	162	55.0891	125	42.8698	150	44.5761	0	0	1	0.361938	0	0	26	9.47183	65	21.9451	42	14.8397	chr00	28808347	28808523	+	177	-	-	-	Unknown protein
MELO3C001657.2	3	0.898357	2	0.604016	0	0	2	0.618383	6	1.91233	6	1.58537	2	0.641605	0	0	1	0.311137	chr00	27494923	27495229	+	201	-	GO:0051087	-	BAG family molecular chaperone regulator 4
MELO3C001663.2	0	0	0	0	0	0	0	0	0	0	0	0	0	0	0	0	0	0	chr00	20001619	20001932	+	280	-	-	-	Unknown protein
MELO3C001664.2	4	1.0845	1	0.27344	1	0.236936	1	0.279944	0	0	6	1.4354	6	1.74274	1	0.269182	1	0.281706	chr00	16098028	16098249	+	222	-	GO:0000287;GO:0009055;GO:0009507;GO:0009522;GO:0009535;GO:0009536;GO:0009579;GO:0015979;GO:0016020;GO:0016021;GO:0016168;GO:0016491;GO:0018298;GO:0046872;GO:0051536;GO:0051539;GO:0055114	K02689	Photosystem I P700 chlorophyll a apoprotein A1
MELO3C001671.2	0	0	0	0	0	0	0	0	0	0	0	0	0	0	0	0	0	0	chr00	31858264	31858422	-	159	-	GO:0007165;GO:0043531	-	TMV resistance protein N-like
MELO3C001676.2	0	0	0	0	0	0	0	0	0	0	0	0	0	0	0	0	0	0	chr04	15714977	15715243	+	267	-	-	-	Unknown protein
MELO3C001682.2	0	0	0	0	0	0	0	0	0	0	0	0	0	0	0	0	0	0	chr00	31729183	31729441	-	259	-	-	-	Unknown protein
MELO3C001698.2	2	0.491346	6	1.48662	7	1.50285	54	13.6978	57	14.9045	55	11.9226	6	1.57913	5	1.21956	2	0.510519	chr00	32142408	32142740	-	245	-	GO:0005886;GO:0006810;GO:0008643;GO:0016020;GO:0016021	K15382	Bidirectional sugar transporter SWEET
MELO3C001701.2	0	0	0	0	0	0	0	0	0	0	0	0	0	0	0	0	0	0	chr00	32264274	32264424	+	151	-	GO:0001731;GO:0003743;GO:0005737;GO:0005852;GO:0006413;GO:0006446;GO:0016282;GO:0033290	K15030	eukaryotic translation initiation factor 3 subunit M
MELO3C001702.2	15	4.16059	18	5.03532	6	1.45437	332	95.0828	127	37.4931	152	37.2015	102	30.3092	45	12.3923	94	27.0905	chr12	27114866	27115082	-	217	-	GO:0016740	K00799	Glutathione s-transferase
MELO3C001707.2	0	0	0	0	0	0	0	0	0	0	0	0	0	0	0	0	0	0	chr00	32390785	32417286	+	480	-	-	-	Unknown protein
MELO3C001711.2	0	0	0	0	0	0	0	0	0	0	0	0	0	0	0	0	0	0	chr00	32233423	32233584	+	162	-	-	-	Unknown protein
MELO3C001721.2	0	0	0	0	0	0	0	0	0	0	0	0	0	0	0	0	0	0	chr00	32695546	32695774	-	229	-	GO:0003682;GO:0007064;GO:0008270;GO:0010468;GO:0046872	K06672	PHD finger family protein
MELO3C001739.2	51	15.742	81	25.2153	90	24.2768	20	6.3741	20	6.57057	30	8.17077	80	26.4539	70	21.4517	55	17.6391	chr00	32983409	32983603	+	195	-	GO:0000786;GO:0003677;GO:0005634;GO:0005694;GO:0046982	-	Histone H2B
MELO3C001741.2	0	0	0	0	0	0	0	0	0	0	0	0	0	0	0	0	0	0	chr00	33000861	33001043	-	183	-	-	-	Unknown protein
MELO3C001749.2	0	0	0	0	0	0	0	0	0	0	0	0	0	0	0	0	0	0	chr03	22910070	22910588	-	519	-	GO:0004857;GO:0043086;GO:0046910	-	pectinesterase inhibitor-like
MELO3C001754.2	0	0	0	0	0	0	0	0	0	0	0	0	0	0	0	0	0	0	chr00	33133888	33134055	-	168	-	-	-	Unknown protein
MELO3C001755.2	0	0	0	0	0	0	0	0	0	0	0	0	0	0	0	0	0	0	chr00	33179920	33180108	+	189	-	-	-	Unknown protein
MELO3C001757.2	0	0	0	0	0	0	0	0	0	0	0	0	0	0	0	0	0	0	chr00	33383323	33383571	+	249	-	-	-	Unknown protein
MELO3C001758.2	0	0	0	0	0	0	0	0	0	0	0	0	0	0	0	0	0	0	chr00	33427874	33428035	-	162	-	-	-	Unknown protein
MELO3C001761.2	0	0	0	0	0	0	0	0	0	0	0	0	0	0	0	0	0	0	chr10	13128022	13128186	+	165	-	GO:0003993;GO:0016311;GO:0016791	K03103	multiple inositol polyphosphate phosphatase 1-like isoform X2
MELO3C001764.2	0	0	0	0	0	0	0	0	0	0	0	0	0	0	0	0	0	0	chr00	32971267	32971542	-	276	-	-	-	Unknown protein
MELO3C001765.2	0	0	0	0	0	0	0	0	0	0	0	0	0	0	0	0	0	0	chr00	33556897	33557145	-	249	-	-	-	Unknown protein
MELO3C001768.2	0	0	0	0	0	0	0	0	0	0	0	0	0	0	0	0	0	0	chr00	7573536	7573685	-	150	-	GO:0004553;GO:0005975;GO:0008152;GO:0016787;GO:0016798	K01179	Cellulase (Glycosyl hydrolase family 5) protein
MELO3C001773.2	0	0	0	0	0	0	0	0	0	0	0	0	0	0	0	0	0	0	chr00	33576367	33576516	+	150	-	GO:0004553;GO:0005975;GO:0008152;GO:0016787;GO:0016798	K01179	Cellulase (Glycosyl hydrolase family 5) protein
MELO3C001782.2	0	0	0	0	0	0	0	0	0	0	0	0	0	0	0	0	0	0	chr00	33495883	33496071	-	189	-	-	-	Unknown protein
MELO3C001795.2	0	0	0	0	0	0	0	0	0	0	0	0	0	0	0	0	0	0	chr00	33910921	33911122	+	202	-	-	-	Unknown protein
MELO3C001803.2	0	0	0	0	0	0	0	0	0	0	0	0	0	0	0	0	0	0	chr00	34099908	34100141	-	234	-	-	-	Unknown protein
MELO3C001806.2	5	1.84632	0	0	6	1.93619	7	2.66891	2	0.78605	4	1.30331	4	1.58236	4	1.46646	6	2.30204	chr00	38847821	38847983	+	163	-	-	-	Unknown protein
MELO3C001808.2	0	0	0	0	0	0	0	0	0	0	0	0	0	0	0	0	0	0	chr00	34404355	34404558	+	204	-	GO:0004180;GO:0006508	-	carboxypeptidase Y-like
MELO3C001809.2	0	0	0	0	0	0	0	0	0	0	0	0	0	0	0	0	0	0	chr00	34550745	34551014	-	270	-	-	-	GATA zinc finger domain-containing protein 10-like isoform X2
MELO3C001812.2	3	0.970805	1	0.326363	1	0.282795	0	0	0	0	1	0.285538	113	39.1741	42	13.4938	45	15.1303	chr00	34562229	34562414	+	186	-	GO:0016853;GO:0016866	K15813	Terpene cyclase/mutase family member
MELO3C001821.2	7	2.46391	6	2.12995	15	4.61402	3	1.09031	10	3.74638	17	5.27994	2	0.754168	6	2.09678	8	2.92578	chr11	29145036	29145206	+	171	-	GO:0005506;GO:0009055;GO:0009507;GO:0009535;GO:0009536;GO:0009579;GO:0015979;GO:0016020;GO:0016021;GO:0020037;GO:0031361;GO:0046872;GO:0055114	K02634	Cytochrome f
MELO3C001842.2	0	0	0	0	0	0	0	0	0	0	0	0	0	0	0	0	0	0	chr00	34953379	34953569	-	191	-	-	-	Unknown protein
MELO3C001844.2	215	22.0082	567	58.5356	450	40.2549	99	10.4636	50	5.44754	48	4.33551	700	76.7635	247	25.1025	289	30.7375	chr04	14953728	14954380	+	588	-	GO:0000166;GO:0005524;GO:0006810;GO:0016020;GO:0016021;GO:0016887	-	Pleiotropic drug resistance ABC transporter
MELO3C001863.2	0	0	0	0	0	0	0	0	0	0	0	0	0	0	0	0	0	0	chr00	35968095	35968268	+	174	-	-	-	Unknown protein
MELO3C001865.2	0	0	0	0	0	0	0	0	0	0	0	0	0	0	0	0	0	0	chr00	28958682	28958860	-	179	-	-	-	Unknown protein
MELO3C001880.2	0	0	0	0	2	0.597725	0	0	0	0	1	0.301761	0	0	0	0	0	0	chr00	27524682	27524857	-	176	-	GO:0003824	-	TIM-barrel signal transduction protein isoform 1
MELO3C001889.2	0	0	0	0	0	0	0	0	0	0	0	0	0	0	0	0	0	0	chr00	36585756	36585939	-	184	-	-	-	Unknown protein
MELO3C001900.2	2	0.657813	0	0	0	0	1	0.339604	0	0	0	0	1	0.352357	0	0	2	0.683482	chr00	37240823	37241005	-	183	-	-	-	Unknown protein
MELO3C001902.2	0	0	0	0	0	0	0	0	0	0	0	0	0	0	0	0	0	0	chr00	37383694	37383873	+	180	-	-	-	Unknown protein
MELO3C001905.2	0	0	0	0	0	0	0	0	0	0	0	0	0	0	0	0	0	0	chr00	37393284	37393452	+	169	-	-	-	Unknown protein
MELO3C001914.2	23	9.04815	61	24.2021	30	10.3137	73	29.6521	39	16.3298	36	12.4965	30	12.6434	26	10.155	47	19.2112	chr00	38534946	38535098	+	153	-	-	-	TSA: Wollemia nobilis Ref_Wollemi_Transcript_14781_959 transcribed RNA sequence
MELO3C001915.2	0	0	0	0	0	0	0	0	0	0	0	0	0	0	0	0	0	0	chr12	27558430	27560726	-	2113	-	GO:0005507;GO:0016491;GO:0055114	K00423	L-ascorbate oxidase homolog
MELO3C001916.2	519	14.2123	571	15.7697	683	16.3447	132	3.73224	120	3.49753	137	3.31031	468	13.7294	580	15.7688	508	14.4539	chr12	27530139	27557706	-	2198	-	GO:0005524;GO:0006457;GO:0009408;GO:0031072;GO:0051082	K03686	chaperone protein DnaJ isoform X2
MELO3C001921.2	2388	31.7573	2553	34.2413	2929	34.0399	1067	14.6512	1102	15.5982	1356	15.9119	1976	28.1518	2034	26.8556	2096	28.9618	chr12	27483220	27527213	+	4526	-	GO:0000166;GO:0004672;GO:0004674;GO:0004697;GO:0005524;GO:0006468;GO:0016301;GO:0016310;GO:0016740	-	Kinase, putative
MELO3C001922.2	996	20.0432	972	19.7271	1242	21.8418	303	6.29578	429	9.18859	474	8.41663	868	18.7127	997	19.9194	1019	21.3062	chr12	27464909	27478610	-	2991	-	GO:0003924;GO:0004871;GO:0007165;GO:0007186;GO:0019001;GO:0031683	-	extra-large guanine nucleotide-binding protein 3-like
MELO3C001923.2	236	12.4385	253	13.4483	332	15.2917	79	4.29917	103	5.77802	109	5.06917	238	13.4383	321	16.7972	261	14.293	chr12	27456275	27463302	+	1142	-	GO:0004721;GO:0005634;GO:0006397;GO:0006470	K15544	RNA polymerase II subunit A C-terminal domain phosphatase SSU72
MELO3C001924.2	429	12.1114	349	9.93694	505	12.4591	55	1.60324	66	1.98319	95	2.36653	281	8.49871	404	11.3238	329	9.65066	chr12	27445694	27455125	+	2132	-	GO:0008080;GO:0016740	-	N-alpha-acetyltransferase 40
MELO3C001926.2	533	14.2015	508	13.6509	588	13.6913	189	5.19959	203	5.75689	278	6.53589	574	16.3844	576	15.2372	484	13.3992	chr12	27403463	27444565	-	2259	-	GO:0004371;GO:0005524;GO:0006071;GO:0016301;GO:0016310	K00863	Dihydroxyacetone kinase family protein
MELO3C001929.2	149	4.88469	55	1.81846	98	2.80761	21	0.710837	16	0.558284	22	0.636394	62	2.17747	79	2.5713	72	2.45249	chr12	27395037	27397610	+	1836	-	GO:0003676	-	protein SHOOT GRAVITROPISM 5-like
MELO3C001930.2	1	0.0722568	0	0	0	0	24	1.79056	17	1.30741	29	1.84897	4	0.309634	3	0.215216	3	0.225229	chr12	27384570	27385592	+	833	-	GO:0005886;GO:0016020;GO:0016021	-	CASP-like protein
MELO3C001931.2	3042	77.6825	3148	81.0755	3672	81.9459	740	19.5117	1079	29.3271	1471	33.1459	3542	96.8998	3557	90.1825	3950	104.806	chr12	27379911	27384067	+	2357	-	GO:0016020;GO:0016021	-	Transmembrane 9 superfamily member
MELO3C001932.2	1452	19.8898	1544	21.3305	1757	21.0327	771	10.9048	691	10.0746	998	12.0628	1598	23.4504	1679	22.8344	1786	25.4197	chr12	27365414	27374179	-	4394	-	GO:0004672;GO:0005524;GO:0006468;GO:0016301;GO:0016310	-	Kinase family protein
MELO3C001934.2	0	0	0	0	0	0	0	0	0	0	0	0	0	0	0	0	0	0	chr12	27365373	27365534	+	162	-	-	-	Unknown protein
MELO3C001937.2	1502	36.6904	1546	38.0876	1716	36.632	199	5.01921	191	4.96593	235	5.06528	1253	32.7902	1505	36.5001	1316	33.4013	chr12	27353591	27358830	+	2464	-	GO:0003677;GO:0003887;GO:0005634;GO:0006260;GO:0006261;GO:0008622;GO:0016740;GO:0016779;GO:0071897	K02325	DNA polymerase epsilon subunit
MELO3C001938.2	23375	820.372	16584	587.002	21993	674.535	1023	37.0711	1485	55.4715	1642	50.8493	14588	548.486	26688	929.93	22297	813.075	chr12	27350477	27352982	+	1715	-	GO:0003824;GO:0004351;GO:0006536;GO:0016831;GO:0019752;GO:0030170	K01580	glutamate decarboxylase
MELO3C001939.2	522	21.8949	379	16.0325	611	22.3961	259	11.2169	225	10.0447	284	10.511	787	35.3636	661	27.5263	639	27.8482	chr12	27342775	27349463	+	1435	-	GO:0016491;GO:0055114	-	Oxidoreductase Tas aldo/keto reductase family protein
MELO3C001940.2	2	0.0413961	1	0.0208747	0	0	10	0.213712	4	0.0881198	7	0.127844	1	0.0221738	4	0.0821985	3	0.0645171	chr12	27335780	27340248	+	2908	-	GO:0003677;GO:0005634;GO:0006355;GO:0008289;GO:0043565	K09338	Homeobox-leucine zipper family protein
MELO3C001941.2	943	19.0659	1058	21.5735	1192	21.0611	1885	39.351	1453	31.2676	1814	32.3619	1664	36.042	1441	28.9257	2027	42.5817	chr12	27301732	27329514	+	2977	-	GO:0005216;GO:0006810;GO:0006811;GO:0016020;GO:0016021;GO:0034220;GO:0055085	K05391	Cyclic nucleotide gated channel
MELO3C001942.2	2813	92.6226	2771	92.0184	3385	97.4017	1485	50.4863	1711	59.9628	2108	61.245	2773	97.8155	2658	86.8914	2938	100.513	chr12	27287407	27298465	-	1828	-	GO:0003824	-	bifunctional D-cysteine desulfhydrase/1-aminocyclopropane-1-carboxylate deaminase, mitochondrial
MELO3C001943.2	46	2.20792	59	2.85607	74	3.10397	33	1.63546	64	3.26957	76	3.21879	16	0.822728	87	4.14591	64	3.19176	chr12	27285663	27286999	-	1254	-	GO:0016020;GO:0016021	-	17. class I heat shock protein
MELO3C001944.2	1554	54.8593	974	34.6776	1592	49.1137	258	9.40413	486	18.2608	538	16.7585	627	23.7125	2498	87.552	2094	76.807	chr12	27277084	27278788	-	1705	-	GO:0016020;GO:0016021	-	Cotton fiber expressed protein
MELO3C001945.2	0	0	0	0	0	0	0	0	0	0	0	0	0	0	0	0	0	0	chr12	27278442	27278663	+	222	-	-	-	Unknown protein
MELO3C001946.2	0	0	0	0	1	0.0400303	4	0.189186	4	0.195017	6	0.242511	0	0	2	0.0909563	0	0	chr12	27274263	27276224	+	1314	-	GO:0009055	-	Blue copper protein
MELO3C001947.2	946	36.5466	894	34.8325	1079	36.4282	581	23.1757	740	30.4279	863	29.4184	918	37.9935	1221	46.8324	1111	44.5959	chr12	27271583	27273728	+	1558	-	GO:0001731;GO:0003676;GO:0003723;GO:0003743;GO:0005737;GO:0005852;GO:0006413;GO:0006446;GO:0016282;GO:0033290	K03248	eukaryotic translation initiation factor 3 subunit G-like
MELO3C001948.2	369	11.5919	309	9.78988	491	13.4794	359	11.6445	347	11.6022	418	11.5866	348	11.7116	534	16.655	431	14.0679	chr12	27264481	27270183	-	1916	-	GO:0016491;GO:0016630;GO:0055114	-	Short-chain dehydrogenase, putative
MELO3C001949.2	507	17.6191	401	14.0543	510	15.4884	601	21.565	499	18.457	637	19.5329	268	9.97748	502	17.3202	474	17.1151	chr12	27258868	27263276	-	1732	-	GO:0003779;GO:0016301;GO:0016310	-	kinase-interacting family protein
MELO3C001950.2	334	13.3047	219	8.7982	377	13.1238	220	9.0486	207	8.77635	203	7.13523	350	14.9361	408	16.1359	401	16.5969	chr12	27253059	27255997	+	1511	-	-	-	Tetratricopeptide repeat (TPR)-containing protein
MELO3C001951.2	2	0.122337	0	0	3	0.160365	25	1.57895	9	0.585943	11	0.593709	0	0	0	0	1	0.0635555	chr12	27251030	27252436	-	984	-	GO:0004553;GO:0005576;GO:0005618;GO:0005975;GO:0006073;GO:0008152;GO:0010411;GO:0016740;GO:0016762;GO:0016787;GO:0016798;GO:0042546;GO:0048046;GO:0071555	K08235	Xyloglucan endotransglucosylase/hydrolase
MELO3C001952.2	1555	102.514	1381	91.82	1596	91.9488	1560	106.188	1446	101.462	1794	104.358	1395	98.5229	1496	97.9172	1361	93.2257	chr12	27248225	27250975	+	913	-	GO:0006351;GO:0006355	K01527	Nascent polypeptide-associated complex subunit beta
MELO3C001953.2	425	24.1784	504	28.9174	525	26.101	757	44.4666	733	44.384	950	47.6885	501	30.5342	478	26.9985	447	26.4223	chr12	27244100	27247305	+	1058	-	GO:0004842;GO:0008270;GO:0016567	-	IBR domain-containing protein
MELO3C001954.2	100	3.56998	116	4.17652	65	2.02787	418	15.4079	171	6.4975	188	5.92211	404	15.451	404	14.3193	661	24.5184	chr12	27238547	27242249	+	1686	-	GO:0000139;GO:0005794;GO:0016020;GO:0016021;GO:0016740;GO:0016757;GO:0071555	-	Glycosyltransferase
MELO3C001955.2	0	0	0	0	0	0	0	0	0	0	0	0	0	0	0	0	0	0	chr12	27238762	27238950	-	189	-	-	-	Unknown protein
MELO3C001956.2	8	0.173646	13	0.284582	13	0.246591	242	5.42362	270	6.23766	350	6.70339	10	0.232533	12	0.258601	14	0.315738	chr12	27231997	27236317	+	2773	-	GO:0005985;GO:0016157;GO:0016740;GO:0016757	K00695	Sucrose synthase
MELO3C001957.2	6954	108.943	7878	124.472	8991	123.093	3414	55.2242	3777	62.9792	4109	56.8009	5350	89.7905	6655	103.512	5841	95.0776	chr12	27222927	27230449	+	3842	-	GO:0003676	K11593	protein argonaute 1
MELO3C001958.2	0	0	0	0	0	0	0	0	1	0.0382923	0	0	0	0	0	0	1	0.0373811	chr12	27215707	27217550	-	1673	-	GO:0016829;GO:0030570;GO:0045490;GO:0046872	K01728	Pectate lyase
MELO3C001959.2	0	0	0	0	0	0	0	0	0	0	0	0	0	0	2	0.109548	0	0	chr12	27212045	27215330	-	1091	-	GO:0003677;GO:0006355	-	NAC domain-containing protein 86
MELO3C001960.2	5	0.145316	8	0.23449	3	0.0761948	10	0.300084	5	0.154667	7	0.179512	26	0.809519	18	0.519386	11	0.33217	chr12	27208470	27213193	+	2071	-	-	-	DHHA1 domain protein
MELO3C001961.2	139	9.55068	135	9.355	160	9.60727	58	4.11479	56	4.09536	77	4.66834	234	17.2245	236	16.0993	238	16.9911	chr12	27205045	27207933	-	876	-	GO:0003676	-	Glycine-rich RNA-binding protein
MELO3C001962.2	472	20.2636	516	22.3417	574	21.5351	1880	83.3361	2301	105.142	3030	114.781	552	25.3878	484	20.6298	412	18.378	chr12	27202220	27204001	+	1402	-	GO:0003677	-	protein REVEILLE 2-like
MELO3C001963.2	0	0	0	0	0	0	0	0	1	0.190664	1	0.158065	0	0	1	0.177852	0	0	chr12	27195881	27196216	+	336	-	-	-	Unknown protein
MELO3C001964.2	7	0.187257	4	0.107917	3	0.070133	12	0.331453	2	0.056945	12	0.283253	146	4.18412	46	1.22173	76	2.11242	chr12	27192629	27195221	+	2250	-	GO:0003712;GO:0004402;GO:0005634;GO:0006355;GO:0008270;GO:0016573	-	BTB/POZ and TAZ domain-containing protein 1-like
MELO3C001965.2	208	16.0301	171	13.2911	268	18.0496	103	8.19614	156	12.7962	148	10.0644	190	15.6869	234	17.9045	197	15.7748	chr12	27183673	27186161	+	781	-	GO:0010287	-	UPF0426 protein chloroplastic
MELO3C001966.2	345	17.8551	395	20.6173	406	18.3624	395	21.1077	449	24.7329	519	23.7008	276	15.3025	306	15.7232	315	16.9387	chr12	27179953	27183234	+	1163	-	GO:0005634	-	Ankyrin repeat protein
MELO3C001967.2	347	10.8386	384	12.0966	404	11.0277	67	2.16081	101	3.35774	104	2.86634	362	12.1133	409	12.6835	389	12.6246	chr12	27169473	27173265	-	1927	-	GO:0005634	-	Kelch repeat-containing F-box family protein
MELO3C001968.2	0	0	0	0	0	0	0	0	0	0	0	0	0	0	1	0.0913735	0	0	chr12	27164167	27164931	-	654	-	GO:0046983	-	transcription factor PRE5-like
MELO3C001969.2	144	8.6071	96	5.78703	117	6.11139	306	18.8849	188	11.9601	216	11.392	194	12.4224	189	11.2158	254	15.7744	chr12	27161445	27162451	+	1007	-	GO:0004857;GO:0043086	-	pectinesterase 3
MELO3C001970.2	1	0.0384109	3	0.116216	1	0.0335672	2	0.0793203	2	0.0817653	5	0.169464	5	0.205748	1	0.0381355	3	0.119729	chr12	27156451	27159641	-	1567	-	GO:0008017	K10436	RP/EB family microtubule-associated protein
MELO3C001971.2	10	0.56676	11	0.628756	6	0.297174	8	0.468154	18	1.08581	17	0.85016	33	2.00366	33	1.8569	22	1.29553	chr12	27153758	27155211	+	1062	-	GO:0016020	K17279	HVA22-like protein
MELO3C001972.2	0	0	0	0	0	0	0	0	0	0	0	0	0	0	0	0	0	0	chr12	27147795	27150556	+	1843	-	GO:0003677;GO:0005634;GO:0006351;GO:0006355	-	transcription factor TCP15-like
MELO3C001973.2	1909	68.313	1906	68.7878	2378	74.3652	1379	50.9521	1486	56.5979	1743	55.0361	1395	53.4789	1555	55.2462	1425	52.9831	chr12	27136993	27141486	+	1682	-	GO:0005634;GO:0006334	K11290	NAP1-related protein 2
MELO3C001974.2	259	6.38378	274	6.81113	313	6.7419	150	3.81741	127	3.3317	206	4.4802	231	6.09958	279	6.82742	229	5.8646	chr12	27128551	27133212	+	2442	-	GO:0016301;GO:0016310	-	protein PHYTOCHROME KINASE SUBSTRATE 1-like
MELO3C001976.2	797	14.7016	752	13.9899	953	15.3624	361	6.87565	336	6.59675	442	7.19418	821	16.2241	832	15.2372	713	13.6654	chr12	27117685	27125302	-	3263	-	GO:0003723;GO:0004519;GO:0009451;GO:0043231;GO:0090305	-	Pentatricopeptide repeat-containing family protein
MELO3C001977.2	1	0.0970805	0	0	0	0	29	2.9069	6	0.619965	6	0.513968	2	0.208004	0	0	1	0.100869	chr12	27115955	27118111	-	620	-	GO:0016740	K00799	Glutathione s-transferase
MELO3C001978.2	15	1.92095	30	3.8747	19	2.12637	492	65.0565	181	24.6711	259	29.267	150	20.5791	40	5.08581	113	15.0359	chr12	27115111	27115580	-	470	-	GO:0016740	K00799	Glutathione s-transferase
MELO3C001979.2	40	1.24811	42	1.3217	42	1.14525	38	1.22426	19	0.631	17	0.468051	51	1.70479	66	2.04461	111	3.59865	chr12	27111482	27113410	-	1929	-	GO:0008270	-	pentatricopeptide repeat-containing protein At1g74630
MELO3C001980.2	1138	47.435	1161	48.8067	1350	49.1757	607	26.1243	768	34.0723	1016	37.3682	1163	51.9334	1313	54.337	1291	55.9123	chr12	27106689	27110537	-	1444	-	GO:0009507;GO:0009535;GO:0009941;GO:0016787	-	Alpha/beta-Hydrolases superfamily protein
MELO3C001981.2	399	19.9467	983	49.5611	760	33.2025	1145	59.102	523	27.8281	725	31.9807	1715	91.8484	349	17.322	557	28.9319	chr12	27095833	27097323	-	1204	-	GO:0003677	K09422	MYB-related transcription factor
MELO3C001982.2	1	0.0512691	4	0.206826	4	0.179216	1	0.0529365	0	0	2	0.090477	1	0.0549245	3	0.152704	0	0	chr12	27077137	27078310	-	1174	-	GO:0003677	-	Zinc finger homeodomain protein 1
MELO3C001983.2	14	0.402416	5	0.144946	14	0.35167	0	0	2	0.0611873	0	0	40	1.23173	11	0.313917	12	0.358388	chr12	27069175	27072043	-	2094	-	GO:0016020;GO:0016021	-	Exostosin-like protein
MELO3C001984.2	0	0	3	0.262407	0	0	2	0.179099	0	0	1	0.0765273	0	0	0	0	0	0	chr12	27068184	27068877	+	694	-	GO:0005576;GO:0005615;GO:0007275;GO:0030154;GO:0033612;GO:0045168;GO:0048046	-	CLAVATA3/ESR (CLE)-related protein 45
MELO3C001985.2	614	24.6213	709	28.6734	654	22.9182	165	6.83167	153	6.53008	178	6.29819	674	28.9543	614	24.4448	536	22.3322	chr12	27063024	27066971	+	1501	-	GO:0008270;GO:0016020;GO:0016021;GO:0046872	-	RING/FYVE/PHD zinc finger protein
MELO3C001986.2	1	0.0496616	4	0.200342	7	0.303794	0	0	0	0	0	0	9	0.478822	4	0.197222	2	0.103199	chr12	27056201	27058002	+	1212	-	GO:0016020;GO:0016021	-	Disulfide bond formation protein B 2, putative
MELO3C001987.2	738	23.4407	736	23.5767	1116	30.977	1367	44.8314	1643	55.5439	1981	55.5202	491	16.7073	382	12.0463	413	13.6298	chr12	27049448	27051827	-	1895	-	GO:0003677;GO:0005634;GO:0006355	-	cyclic dof factor 3
MELO3C001988.2	12	0.922451	11	0.852796	7	0.470241	8	0.634968	2	0.163635	1	0.0678288	24	1.97644	25	1.90799	52	4.15327	chr12	27038251	27039033	-	783	-	GO:0005509	K02183	Calcium-binding EF-hand family protein, putative
MELO3C001989.2	114	4.93289	125	5.45503	146	5.5209	31	1.38503	44	2.02644	43	1.64179	171	7.92689	137	5.88561	194	8.72214	chr12	27033676	27037376	-	1391	-	GO:0006464;GO:0016874	-	Biotin/lipoate A/B protein ligase family
MELO3C001991.2	52	1.41559	42	1.15312	64	1.52256	76	2.13623	90	2.60772	95	2.28198	104	3.03304	66	1.78383	47	1.32941	chr12	27027923	27032486	-	2211	-	GO:0003677;GO:0005634;GO:0006351;GO:0006355;GO:0016491;GO:0032440;GO:0046983;GO:0055114	K04454	Mads box protein, putative
MELO3C001992.2	156	35.1671	111	25.2363	122	24.0344	9	2.09486	25	5.99842	30	5.96741	235	56.7532	183	40.9579	131	30.6837	chr12	27027250	27027805	+	267	-	GO:0009507;GO:0009522;GO:0009523;GO:0009535;GO:0009536;GO:0009579;GO:0009765;GO:0015979;GO:0016020;GO:0016021;GO:0016168;GO:0018298	K08910	Chlorophyll a-b binding protein, chloroplastic
MELO3C001993.2	1	0.0621796	2	0.125421	0	0	0	0	6	0.397085	3	0.164597	1	0.0666129	0	0	0	0	chr12	27025040	27026290	+	968	-	GO:0005576;GO:0009664	-	expansin-A10
MELO3C001994.2	470	19.7827	461	19.5695	643	23.6515	764	33.2033	1354	60.6583	1707	63.3977	207	9.33401	241	10.0712	174	7.60959	chr12	27017617	27019360	-	1430	-	GO:0005623;GO:0045454	-	thioredoxin-like 1-2, chloroplastic
MELO3C001995.2	991	49.7483	1073	54.3244	1020	44.7471	119	6.1681	125	6.6788	165	7.30871	790	42.4856	1175	58.5621	1099	57.3227	chr12	27010896	27014245	-	1199	-	GO:0016020;GO:0016021	-	YGL010w-like protein
MELO3C001996.2	992	50.3443	824	42.1752	964	42.754	213	11.1614	288	15.5566	330	14.7777	295	16.0388	403	20.3057	378	19.9322	chr12	27007772	27009161	-	1186	-	GO:0003677;GO:0006355	-	NAC domain-containing protein 100-like
MELO3C001997.2	17	0.412094	38	0.929012	19	0.402495	7	0.175204	9	0.232206	7	0.149726	14	0.363568	16	0.385072	23	0.579295	chr12	27001597	27004940	+	2483	-	GO:0008107;GO:0016020;GO:0016021;GO:0016740;GO:0016757;GO:0036065;GO:0042546	K13681	Galactoside 2-alpha-L-fucosyltransferase
MELO3C001998.2	4031	172.81	3232	139.739	4476	167.69	5667	250.847	4717	215.232	6218	235.212	5025	230.783	4354	185.319	4509	200.845	chr12	26997056	27000854	-	1404	-	GO:0003824;GO:0005975;GO:0008152;GO:0016857	K01783	Ribulose-phosphate 3-epimerase-like protein
MELO3C001999.2	637	13.2074	645	13.4874	782	14.1691	150	3.2112	151	3.33225	156	2.854	567	12.5942	632	13.0097	622	13.3996	chr12	26988671	26993502	-	2903	-	GO:0000160;GO:0005622;GO:0005634	K12127	two-component response regulator-like APRR1
MELO3C002000.2	100	2.58326	85	2.21451	85	1.91888	185	4.93446	219	6.02138	308	7.02055	30	0.830232	30	0.76942	47	1.26151	chr12	26987704	26990453	+	2330	-	GO:0004672;GO:0004715;GO:0005524;GO:0006468;GO:0008270;GO:0016020;GO:0016021;GO:0016301;GO:0016310;GO:0016740;GO:0018108	K12127	Kinase, putative
MELO3C002001.2	128	6.66463	117	6.14387	153	6.96174	12	0.645129	6	0.332507	23	1.05669	26	1.45027	49	2.53301	51	2.75906	chr12	26981776	26982931	-	1156	-	GO:0016020;GO:0016021	-	Transmembrane protein, putative
MELO3C002002.2	9	0.116672	5	0.0653711	26	0.29455	38	0.508637	25	0.344944	26	0.297407	27	0.374972	30	0.386119	20	0.269389	chr12	26971673	26980656	+	4643	-	GO:0016020;GO:0016021	K02184	Formin-like protein
MELO3C002003.2	13	0.272637	10	0.211511	19	0.348222	14	0.303158	14	0.312503	17	0.314589	23	0.516749	42	0.874512	47	1.02415	chr12	26962806	26968345	+	2870	-	GO:0004672;GO:0005524;GO:0006468;GO:0016301;GO:0016310	-	Kinase superfamily protein
MELO3C002004.2	9	1.06217	15	1.7854	11	1.13451	1	0.121858	4	0.502456	1	0.104137	16	2.02294	20	2.34346	4	0.490499	chr12	26953548	26954357	+	510	-	-	-	At2g03350
MELO3C002005.2	8	2.67511	14	4.72139	15	4.38332	6	2.07158	2	0.711812	6	1.77033	11	3.94053	14	4.64787	8	2.77949	chr12	26951062	26951241	+	180	-	-	-	Unknown protein
MELO3C002006.2	605	13.9147	634	14.7062	662	13.3057	173	4.10833	292	7.14804	424	8.60475	756	18.6274	802	18.3134	776	18.5441	chr12	26947919	26951156	-	2617	-	-	-	T-box transcription factor, putative (DUF863)
MELO3C002007.2	0	0	0	0	0	0	1	0.0315309	3	0.0975085	2	0.0538914	0	0	0	0	0	0	chr12	26944317	26947685	+	1971	-	GO:0004497;GO:0004499;GO:0016491;GO:0050660;GO:0050661;GO:0055114	-	Flavin-containing monooxygenase
MELO3C002008.2	246	7.9606	251	8.19172	285	8.05964	280	9.35553	314	10.815	381	10.879	135	4.6801	183	5.87944	186	6.25386	chr12	26937590	26939449	-	1860	-	GO:0005516	-	Plant calmodulin-binding-like protein
MELO3C002009.2	4	0.173333	3	0.131109	5	0.189344	3	0.134228	1	0.0461217	1	0.0382361	0	0	3	0.129068	0	0	chr12	26934561	26935949	-	1389	-	GO:0004842;GO:0005515;GO:0005634;GO:0005737;GO:0006952;GO:0009626;GO:0016567;GO:0031146;GO:0031348;GO:0042177	-	F-box protein CPR30
MELO3C002010.2	4	0.109785	0	0	3	0.0719559	0	0	1	0.0292125	0	0	3	0.0882097	1	0.0272496	3	0.0855521	chr12	26927996	26933106	+	2193	-	GO:0016020;GO:0016798	K07964	heparanase-like protein 1
MELO3C002011.2	3	0.189276	5	0.318153	2	0.110272	0	0	0	0	2	0.111342	0	0	7	0.438478	6	0.393325	chr12	26924016	26925641	-	954	-	-	-	Remorin family protein
MELO3C002012.2	14	0.617332	25	1.11179	36	1.38725	11	0.500822	6	0.281596	20	0.778168	64	3.0233	24	1.0507	22	1.00795	chr12	26916139	26920869	-	1365	-	GO:0046983	-	transcription factor PIF7-like isoform X1
MELO3C002013.2	11	1.37363	15	1.88912	16	1.74605	10	1.28937	14	1.86075	22	2.42411	14	1.8729	12	1.48776	12	1.55698	chr12	26914901	26915382	-	482	-	-	-	LYR motif-containing protein 4
MELO3C002014.2	559	24.1711	222	9.68117	264	9.97582	675	30.1362	526	24.2077	635	24.2276	1240	57.4403	1186	50.9148	1021	45.8706	chr12	26912076	26914627	+	1392	-	GO:0000911;GO:0005484;GO:0005515;GO:0005886;GO:0006810;GO:0007049;GO:0009504;GO:0009507;GO:0009612;GO:0009737;GO:0015031;GO:0016020;GO:0016021;GO:0016192;GO:0051301;GO:0051707;GO:0061025	K18211	SNAP25 homologous protein SNAP33
MELO3C002015.2	343	9.897	387	11.2619	399	10.061	1334	39.7434	1260	38.6958	1300	33.0983	355	10.9736	474	13.5788	439	13.1613	chr12	26899400	26904181	+	2086	-	GO:0005515	-	Myosin heavy chain-like protein
MELO3C002016.2	40	1.58603	64	2.55931	74	2.56415	53	2.16984	57	2.40553	70	2.44908	58	2.46371	56	2.20452	53	2.1835	chr12	26895017	26896534	+	1518	-	GO:0003676	-	zinc finger protein ZAT4-like
MELO3C002017.2	225	6.17543	216	5.97901	247	5.92437	158	4.47756	172	5.02456	181	4.38345	222	6.52752	199	5.42266	258	7.35748	chr12	26883600	26892896	+	2193	-	GO:0000166;GO:0003951;GO:0004143;GO:0005524;GO:0005622;GO:0007205;GO:0008152;GO:0016020;GO:0016021;GO:0016301;GO:0016310;GO:0016740;GO:0035556	K00901	Diacylglycerol kinase
MELO3C002018.2	3137	30.4394	3152	30.846	3863	32.7572	1974	19.7774	1968	20.325	2268	19.4186	2490	25.884	2717	26.175	2579	26.0015	chr12	26869736	26880233	+	6203	-	GO:0009506	-	Dentin sialophosphoprotein-like protein
MELO3C002019.2	1801	45.0736	1744	44.0196	1944	42.5172	1661	42.9218	1746	46.509	2362	52.1604	1505	40.3511	1787	44.4025	1716	44.6222	chr12	26861968	26867791	-	2405	-	GO:0006368;GO:0016570;GO:0016593	K15177	protein LEO1 homolog
MELO3C002020.2	2918	56.9871	3922	77.2483	4328	73.865	6389	128.832	9275	192.792	10486	180.698	1782	37.2828	3121	60.5145	2146	43.5457	chr12	26857128	26860721	-	3082	-	GO:0000166;GO:0005524;GO:0019538	K03695	Chaperone protein
MELO3C002021.2	765	38.7913	710	36.3096	752	33.3235	461	24.1365	511	27.579	542	24.2507	410	22.2724	451	22.7051	469	24.7099	chr12	26853438	26856627	-	1187	-	GO:0016021	-	transmembrane protein adipocyte-associated 1 homolog
MELO3C002022.2	528	14.2768	552	15.0532	596	14.0833	2227	62.1754	2316	66.6532	2966	70.7656	900	26.0706	1160	31.1409	1151	32.3369	chr12	26850717	26853221	+	2226	-	GO:0001522;GO:0003723;GO:0006396;GO:0009451;GO:0009982;GO:0019013;GO:0030529	K11131	H/ACA ribonucleoprotein complex subunit 4
MELO3C002023.2	5050	48.6257	4875	47.3412	5901	49.6547	1794	17.836	2018	20.6814	2429	20.6374	3196	32.9679	3658	34.9697	3513	35.1461	chr12	26825148	26849443	+	6251	-	GO:0003676;GO:0004386;GO:0005524	K18663	DExH-box ATP-dependent RNA helicase DExH14
MELO3C002024.2	149	8.10144	59	3.23533	139	6.60467	32	1.79649	55	3.1829	60	2.87859	210	12.2322	324	17.4902	201	11.3553	chr12	26817827	26822002	-	1107	-	-	-	PLASMODESMATA CALLOSE-BINDING PROTEIN 3-like
MELO3C002025.2	0	0	0	0	0	0	0	0	2	0.0463051	3	0.0575822	0	0	0	0	0	0	chr12	26807052	26815411	-	2767	-	GO:0008270;GO:0046872	-	RING/FYVE/PHD zinc finger superfamily protein
MELO3C002027.2	2755	111.741	2574	105.29	3190	113.068	3604	150.93	3851	166.245	4780	171.069	2888	125.487	3453	139.047	3202	134.938	chr12	26801920	26805435	-	1484	-	GO:0006754;GO:0006810;GO:0006811;GO:0015986;GO:0015992;GO:0045261;GO:0046933	K02136	ATP synthase subunit gamma
MELO3C002028.2	10	0.309938	9	0.281324	7	0.189598	64	2.04811	59	1.9463	82	2.24254	19	0.630868	23	0.707745	21	0.676267	chr12	26799022	26801314	-	1942	-	GO:0016829	-	Formate hydrogenlyase subunit 5
MELO3C002029.2	55	4.68901	41	3.52528	59	4.39573	784	69.0136	768	69.689	774	58.2254	94	8.58533	191	16.1669	161	14.2616	chr12	26796755	26798486	+	706	-	GO:0003676	K12741	Glycine-rich RNA-binding protein
MELO3C002030.2	1240	82.9283	1377	92.8765	1269	74.1657	4679	323.098	5785	411.783	7079	417.739	1545	110.693	2086	138.506	1739	120.839	chr12	26794290	26796169	+	900	-	GO:0003676	K12741	Glycine-rich RNA-binding protein
MELO3C002031.2	1034	22.1245	1138	24.5576	1033	19.3159	810	17.8953	1020	23.2294	1156	21.8255	782	17.9255	727	15.4441	896	19.9199	chr12	26788555	26791826	-	2813	-	GO:0000145;GO:0006887	K07195	exocyst complex component EXO70A1
MELO3C002032.2	195	6.53874	268	9.06326	211	6.18304	600	20.7735	831	29.6582	932	27.5758	177	6.35833	219	7.29084	159	5.53963	chr12	26785898	26787692	+	1795	-	GO:0000139;GO:0004190;GO:0005783;GO:0005789;GO:0005794;GO:0006508;GO:0007219;GO:0008233;GO:0016020;GO:0016021;GO:0016485;GO:0016787	K04505	Presenilin
MELO3C002033.2	1685	66.5485	2041	81.2966	2108	72.7561	815	33.235	932	39.1777	1208	42.0977	1381	58.4309	1313	51.4847	1055	43.2928	chr12	26779409	26785109	+	1524	-	GO:0006629;GO:0008081	K01126	glycerophosphodiester phosphodiesterase GDPD6
MELO3C002034.2	2044	83.4089	2642	108.731	2413	86.0497	171	7.20489	166	7.20981	208	7.48941	1862	81.3995	1726	69.9273	1144	48.5045	chr12	26774957	26777136	+	1475	-	GO:0007165	-	ninja-family protein 6-like isoform X2
MELO3C002035.2	639	58.3632	745	68.6254	626	49.9658	1194	112.601	1263	122.779	1700	137.006	843	82.4852	787	71.3654	621	58.9324	chr12	26766264	26768624	+	659	-	GO:0005742	-	mitochondrial import receptor subunit TOM5 homolog
MELO3C002036.2	65	3.76187	49	2.86007	81	4.09671	25	1.49393	30	1.84797	51	2.60443	73	4.52609	60	3.44759	53	3.18706	chr12	26764778	26765897	-	1040	-	GO:0016020;GO:0016021	-	DUF1118-domain-containing protein
MELO3C002037.2	424	22.1725	473	24.946	447	20.4275	367	19.8159	413	22.987	505	23.3019	406	22.7449	473	24.5575	481	26.1347	chr12	26761885	26764376	-	1151	-	GO:0005739	-	Furry
MELO3C002038.2	0	0	0	0	0	0	9	0.654184	3	0.224783	4	0.248468	0	0	0	0	0	0	chr12	26760188	26761042	-	855	-	GO:0003677;GO:0005634;GO:0006351;GO:0006355	-	transcription factor TCP5
MELO3C002039.2	632	8.0321	836	10.7154	902	10.0179	395	5.18333	298	4.031	485	5.43884	793	10.7968	654	8.2521	595	7.85694	chr12	26753442	26759326	+	4736	-	GO:0051513	-	protein LONGIFOLIA 1-like
MELO3C002040.2	455	12.8213	484	13.7549	527	12.9776	8	0.232762	27	0.809786	25	0.621606	453	13.6751	486	13.5967	439	12.8532	chr12	26743232	26748012	+	2136	-	GO:0016787	-	Haloacid dehalogenase-like hydrolase (HAD) superfamily protein
MELO3C002041.2	287	10.5332	318	11.7706	329	10.552	104	3.94106	149	5.82037	197	6.37967	267	10.4979	287	10.4577	209	7.96986	chr12	26735024	26740026	+	1640	-	GO:0004252;GO:0006508;GO:0016021	-	RHOMBOID-like protein 12, mitochondrial
MELO3C002042.2	512	12.5836	741	18.3672	545	11.7055	229	5.81126	433	11.3268	692	15.007	725	19.089	555	13.5426	537	13.713	chr12	26728756	26733541	+	2449	-	GO:0000166;GO:0005524;GO:0006810;GO:0016020;GO:0016021;GO:0016887;GO:0042626;GO:0055085	-	ABC transporter B family protein
MELO3C002043.2	0	0	0	0	2	0.0541429	3	0.0959559	0	0	1	0.027334	0	0	0	0	2	0.0643733	chr12	26719319	26721730	-	1943	-	GO:0005506;GO:0016705;GO:0020037;GO:0055114	-	cytochrome P450 78A5-like
MELO3C002044.2	34	0.687422	48	0.978761	74	1.30749	12	0.25051	14	0.301271	19	0.338962	83	1.79777	54	1.08396	78	1.63857	chr12	26701519	26709701	-	2977	-	GO:0003677;GO:0003887;GO:0006260;GO:0071897	K02321	DNA polymerase alpha subunit B
MELO3C002045.2	435	15.4561	407	14.5846	468	14.5317	192	7.04387	200	7.56353	295	9.24879	395	15.0355	469	16.5447	396	14.6194	chr12	26696707	26701363	+	1694	-	GO:0006810;GO:0016020;GO:0016021	K14406	Cleavage stimulation factor subunit 50
MELO3C002046.2	44	2.20146	59	2.97715	30	1.31172	2	0.103321	4	0.213011	6	0.264888	36	1.92962	45	2.23535	39	2.02744	chr12	26694194	26695897	+	1203	-	GO:0010215;GO:0016049;GO:0031225	-	COBRA-like protein 4
MELO3C002047.2	1000	41.9734	943	39.9187	1070	39.2481	896	38.8313	935	41.7706	1129	41.8139	3052	137.236	3011	125.476	4555	198.65	chr12	26688962	26691202	-	1434	-	GO:0016866;GO:0030244	K13379	Alpha-1,4-glucan-protein synthase [UDP-forming]
MELO3C002048.2	392	8.35793	571	12.2783	535	9.96843	496	10.9193	564	12.799	755	14.2041	802	18.3188	780	16.5113	741	16.4156	chr12	26681988	26687898	+	2823	-	GO:0003677;GO:0005634	-	squamosa promoter-binding-like protein 12 isoform X1
MELO3C002049.2	75	5.49847	19	1.40483	21	1.34543	17	1.28685	11	0.858336	14	0.905651	14	1.09956	4	0.291149	9	0.685563	chr12	26667769	26671734	-	821	-	GO:0000165;GO:0000977;GO:0003677;GO:0003700;GO:0005634;GO:0006351;GO:0006355;GO:0045944;GO:0046983	K09264	MADS-box transcription factor
MELO3C002050.2	2814	120.124	3460	148.961	3588	133.85	1851	81.5851	1727	78.4659	2381	89.6843	2695	123.246	1868	79.1691	1616	71.6755	chr12	26657501	26662942	-	1410	-	GO:0000165;GO:0000977;GO:0003677;GO:0003700;GO:0005634;GO:0006351;GO:0006355;GO:0045944;GO:0046983	K09264	MADS box transcription factor
MELO3C002051.2	13	0.369438	4	0.114643	10	0.248346	68	1.99529	79	2.38951	98	2.4574	4	0.121778	7	0.197501	6	0.177163	chr12	26653128	26655485	-	2118	-	GO:0006950;GO:0016787	-	Adenine nucleotide alpha hydrolases-like superfamily protein, putative
MELO3C002052.2	282	9.45075	241	8.14564	266	7.79039	205	7.09367	191	6.81294	232	6.86053	254	9.1193	208	6.92078	207	7.20796	chr12	26651124	26653990	+	1796	-	GO:0005215;GO:0005743;GO:0006810;GO:0016020;GO:0016021;GO:0055085	K05863	ADP,ATP carrier protein, mitochondrial
MELO3C002053.2	0	0	0	0	3	0.122801	3	0.145091	0	0	5	0.206654	0	0	0	0	0	0	chr12	26649279	26650811	-	1285	-	GO:0005634;GO:0005737;GO:0005938;GO:0007049;GO:0008356;GO:0009786;GO:0009826;GO:0010374;GO:0019897;GO:0051301	-	Protein BREAKING OF ASYMMETRY IN THE STOMATAL LINEAGE
MELO3C002054.2	548	13.7205	500	12.6255	560	12.2529	84	2.17154	145	3.86404	169	3.73361	369	9.89751	470	11.6832	451	11.7325	chr12	26645817	26649186	+	2404	-	GO:0005515;GO:0009414;GO:0010375;GO:0010497;GO:0015630;GO:0043622;GO:0051607	-	Movement protein binding protein 2C
MELO3C002056.2	98	2.09691	134	2.89167	103	1.92598	497	10.9802	510	11.6147	654	12.3476	123	2.81948	99	2.10312	109	2.42329	chr12	26637115	26640707	-	2813	-	GO:0016740;GO:0016757	-	O-fucosyltransferase family protein
MELO3C002057.2	881	21.6526	778	19.2844	888	19.0725	193	4.8977	212	5.54568	292	6.33243	854	22.4855	994	24.2547	814	20.7866	chr12	26630629	26636200	+	2449	-	GO:0046983	-	transcription factor BIM1-like isoform X2
MELO3C002058.2	1088	27.8904	1122	29.0074	1266	28.3609	126	3.335	183	4.99299	194	4.38813	864	23.7274	961	24.4581	898	23.9181	chr12	26623693	26626880	+	2348	-	GO:0008270;GO:0046872	-	PHD and RING finger domain-containing protein 1
MELO3C002059.2	4	0.33026	1	0.0832696	4	0.288613	0	0	2	0.175756	0	0	6	0.53071	3	0.245919	4	0.343147	chr12	26619983	26620711	+	729	-	GO:0003700;GO:0006355;GO:0043565	-	light-inducible protein CPRF3-like
MELO3C002060.2	260	21.1764	232	19.0571	310	22.0649	636	53.4855	656	56.8679	817	58.7156	591	51.5676	745	60.2435	631	53.399	chr12	26610037	26611544	-	739	-	GO:0003723;GO:0005730;GO:0019013;GO:0030529	K11129	H/ACA ribonucleoprotein complex subunit 2-like protein
MELO3C002061.2	856	26.7372	852	26.8394	956	26.0952	1086	35.0245	1098	36.503	1384	38.1444	742	24.8288	782	24.2506	785	25.4763	chr12	26605537	26609196	-	1927	-	GO:0000166;GO:0004672;GO:0004674;GO:0005524;GO:0006468;GO:0016301;GO:0016310;GO:0016740	K08856	Serine/threonine protein kinase, putative
MELO3C002062.2	0	0	0	0	0	0	0	0	0	0	0	0	0	0	0	0	0	0	chr12	26603193	26604732	-	1399	-	GO:0016021	-	tetraspanin-8-like
MELO3C002063.2	783	15.4622	442	8.80281	904	15.6005	1047	21.3479	840	17.6552	1106	19.2715	679	14.3644	585	11.4694	519	10.6488	chr12	26600766	26604710	+	3048	-	GO:0016020;GO:0016021	-	Calcium sensing receptor, chloroplastic-like protein
MELO3C002064.2	21	0.481153	24	0.554582	18	0.36041	232	5.48847	56	1.36564	67	1.35454	180	4.41821	130	2.95721	218	5.18973	chr12	26595401	26600603	+	2627	-	GO:0000166;GO:0000287;GO:0004012;GO:0005524;GO:0015914;GO:0016021;GO:0045332	K01530	phospholipid-transporting ATPase 10-like
MELO3C002065.2	410	11.9448	498	14.6323	533	13.57	1559	46.8964	858	26.6051	981	25.2182	1049	32.74	663	19.177	858	25.972	chr12	26581176	26584809	+	2066	-	GO:0000166;GO:0000287;GO:0004012;GO:0005524;GO:0015914;GO:0016021;GO:0045332	K01530	phospholipid-transporting ATPase 10-like
MELO3C002066.2	7	0.338145	0	0	5	0.211075	0	0	0	0	1	0.0426244	7	0.362255	6	0.287761	7	0.351341	chr12	26565125	26566370	-	1246	-	GO:0005737;GO:0005783;GO:0005789;GO:0009658;GO:0010274;GO:0016020;GO:0032541	-	Protein MIZU-KUSSEI 1
MELO3C002067.2	570	14.7183	516	13.4376	549	12.3884	2383	63.5338	2633	72.363	3484	79.3802	983	27.1923	1213	31.0969	1253	33.6169	chr12	26557009	26561597	-	2331	-	GO:0000166;GO:0003676;GO:0003723;GO:0004386;GO:0005524;GO:0016787	K13179	RNA helicase
MELO3C002068.2	21	1.72912	38	3.15559	34	2.4465	9	0.765153	16	1.4022	12	0.871846	11	0.970307	1	0.0817487	4	0.342209	chr12	26555628	26556592	+	731	-	GO:0009055;GO:0016020;GO:0016021	-	Early nodulin-like protein 1
MELO3C002069.2	507	10.4116	593	12.2815	566	10.1574	369	7.82409	309	6.75384	384	6.95811	417	9.1739	478	9.74564	441	9.4096	chr12	26549416	26554969	-	2931	-	GO:0005634;GO:0008270	-	Nuclear-interacting partner of ALK
MELO3C002070.2	93	4.00405	105	4.55928	124	4.6655	76	3.37855	95	4.35336	76	2.88724	162	7.47208	129	5.51418	123	5.50233	chr12	26547427	26549232	+	1398	-	GO:0000413;GO:0003755;GO:0006457;GO:0016853	K03768	Peptidyl-prolyl cis-trans isomerase
MELO3C002071.2	110	5.71752	116	6.08084	124	5.63245	38	2.03938	63	3.4853	54	2.47663	135	7.51725	136	7.01825	164	8.85694	chr12	26544502	26546892	+	1158	-	GO:0003677;GO:0003697	K03111	single-stranded DNA-binding protein, mitochondrial
MELO3C002072.2	26	1.08752	17	0.717137	21	0.767613	15	0.647819	16	0.712307	19	0.701244	44	1.97163	39	1.61958	33	1.43417	chr12	26540089	26542944	-	1439	-	GO:0006950;GO:0016787	-	Adenine nucleotide alpha hydrolases-like superfamily protein
MELO3C002073.2	681	47.2772	635	44.4599	650	39.4347	231	16.5583	295	21.7977	282	17.2745	574	42.6901	824	56.7945	655	47.2466	chr12	26537901	26538767	+	867	-	GO:0016020;GO:0016021	-	Transmembrane protein, putative
MELO3C002074.2	2221	25.4245	2198	25.3759	2631	26.3199	1660	19.6205	1799	21.9189	2220	22.4238	1847	22.6506	2047	23.2646	1869	22.2299	chr12	26508505	26530970	-	5258	-	GO:0003743;GO:0006413;GO:0006508;GO:0008237;GO:0008270	K03128	transcription initiation factor TFIID subunit 2
MELO3C002076.2	0	0	3	0.108464	9	0.281952	0	0	1	0.0381555	5	0.15816	2	0.0768092	7	0.249141	5	0.186238	chr12	26495675	26497527	+	1679	-	GO:0003677;GO:0005634;GO:0006351;GO:0006355	-	Transcription factor TEOSINTE BRANCHED 1
MELO3C002077.2	1253	27.565	1311	29.0871	1570	30.1834	3916	88.9508	4444	104.056	5892	114.373	957	22.5543	1265	27.6295	1033	23.612	chr12	26478594	26483910	+	2736	-	GO:0006629	-	gastric triacylglycerol lipase isoform X2
MELO3C002078.2	1100	81.9417	895	67.2397	1298	84.4982	1460	112.296	1268	100.535	1603	105.365	1195	95.3653	1177	87.0489	964	74.6129	chr12	26471893	26474801	-	808	-	GO:0006508;GO:0008233;GO:0030163	K06891	ATP-dependent Clp protease adapter protein ClpS
MELO3C002079.2	24	0.761897	19	0.608316	38	1.05422	25	0.819455	35	1.1826	66	1.84877	58	1.97253	36	1.13465	37	1.22043	chr12	26468118	26470013	-	1896	-	GO:0004190;GO:0006508;GO:0008233	-	protein ASPARTIC PROTEASE IN GUARD CELL 1-like
MELO3C002080.2	267	12.2959	264	12.2615	295	11.8722	105	4.99272	113	5.53874	115	4.67303	213	10.5084	218	9.96734	235	11.2445	chr12	26459167	26462842	+	1307	-	GO:0004045;GO:0016787	K01056	peptidyl-tRNA hydrolase, chloroplastic
MELO3C002081.2	1460	22.372	1455	22.4857	1695	22.6977	593	9.38224	629	10.2586	665	8.99138	1130	18.5499	1285	19.5492	1339	21.3185	chr12	26445671	26457883	+	3928	-	GO:0000911;GO:0005515;GO:0005886;GO:0007049;GO:0009825;GO:0010235;GO:0016020;GO:0030136;GO:0031410;GO:0040008;GO:0045824;GO:0051301;GO:0080008	-	DENN domain and WD repeat-containing protein SCD1
MELO3C002082.2	1071	30.4936	1289	37.0137	1594	39.6613	1139	33.4844	1175	35.6074	1626	40.85	1283	39.1341	1271	35.9285	1243	36.7718	chr12	26438175	26443845	-	2114	-	GO:0004190;GO:0006508;GO:0008233;GO:0016020;GO:0016021;GO:0016787	-	Aspartic proteinase Asp1
MELO3C002083.2	87	6.02592	49	3.42287	54	3.26857	40	2.86064	25	1.84301	25	1.52791	118	8.75581	51	3.5071	64	4.60584	chr12	26426461	26427329	+	869	-	-	-	Bowman-Birk type bran trypsin inhibitor
MELO3C002084.2	54	7.08116	7	0.925763	13	1.48975	45	6.09289	21	2.93099	34	3.93407	66	9.27182	152	19.7892	199	27.1137	chr12	26414033	26414491	+	459	-	GO:0005515;GO:0005634;GO:0006952;GO:0042742	-	Protein NEGATIVE REGULATOR OF RESISTANCE
MELO3C002085.2	888	25.1641	708	20.2345	919	22.7586	4321	126.431	3959	119.409	4572	114.321	1996	60.5954	2003	56.354	2409	70.9301	chr12	26404247	26406574	-	2124	-	GO:0003677;GO:0003700;GO:0005634;GO:0006351;GO:0006355	-	ethylene-responsive transcription factor ERF071
MELO3C002086.2	1480	132.168	1451	130.684	1674	130.641	1496	137.942	1713	162.819	2320	182.812	1505	143.983	1829	162.163	1484	137.696	chr12	26392791	26393845	+	674	-	GO:0008137;GO:0016491;GO:0055114	K03966	NADH dehydrogenase [ubiquinone] 1 beta subcomplex subunit 10-B
MELO3C002087.2	418	14.4015	379	13.1692	471	14.1812	619	22.0202	789	28.9329	1024	31.1303	372	13.7304	426	14.5719	408	14.6055	chr12	26388020	26391937	-	1747	-	GO:0031124	-	cleavage stimulating factor 64-like
MELO3C002088.2	191	3.79791	297	5.95605	230	3.99668	229	4.70161	154	3.25924	145	2.54409	396	8.43561	284	5.60666	417	8.61533	chr12	26379898	26387330	+	3027	-	GO:0005783	-	C2 domain-containing family protein
MELO3C002089.2	0	0	0	0	0	0	0	0	0	0	0	0	0	0	0	0	0	0	chr12	26371834	26373681	+	1163	-	GO:0046983	-	transcription factor BEE 3-like
MELO3C002090.2	324	15.8937	376	18.6019	231	9.90265	1499	75.9242	554	28.925	701	30.3424	963	50.6076	513	24.9845	1252	63.8128	chr12	26360222	26361641	-	1227	-	GO:0003677	K09422	transcription factor MYB108-like
MELO3C002091.2	1930	105.702	1855	102.461	2082	99.6476	1498	84.7106	1810	105.509	2139	103.369	2845	166.924	3022	164.322	3305	188.071	chr12	26354336	26357147	-	1099	-	GO:0003735;GO:0005622;GO:0005840;GO:0006412	K02993	40S ribosomal protein S7
MELO3C002092.2	254	8.2998	174	5.73421	163	4.6546	61	2.05809	53	1.84329	52	1.4993	614	21.4938	693	22.4824	644	21.8648	chr12	26349547	26354327	+	1842	-	GO:0000166;GO:0004672;GO:0004674;GO:0005524;GO:0006468;GO:0016301;GO:0016310	K04733	Receptor-like kinase
MELO3C002093.2	1215	30.4584	1280	32.3618	1320	28.9178	348	9.00763	392	10.4593	439	9.71065	1063	28.548	1160	28.8711	1131	29.4591	chr12	26341878	26348940	-	2401	-	GO:0005737;GO:0006508;GO:0008233;GO:0008237;GO:0016020;GO:0016787;GO:0046872;GO:0070536;GO:0071108	K11866	AMSH-like ubiquitin thioesterase 1
MELO3C002094.2	0	0	0	0	0	0	0	0	0	0	0	0	2	0.143292	0	0	0	0	chr12	26337437	26338336	-	900	-	GO:0004674;GO:0046777	-	Copper-binding periplasmic protein
MELO3C002095.2	48	2.85768	44	2.6419	55	2.86151	10	0.614713	20	1.26732	24	1.26077	36	2.29607	55	3.25095	36	2.22689	chr12	26335881	26336891	-	1011	-	-	-	Unknown protein
MELO3C002096.2	369	6.93415	445	8.43368	391	6.42102	335	6.49997	511	10.2205	647	10.7281	251	5.05302	333	6.21277	356	6.95091	chr12	26331406	26334608	-	3203	-	GO:0006886;GO:0016192;GO:0030117	K12396	AP-3 complex subunit delta
MELO3C002097.2	0	0	0	0	0	0	0	0	0	0	1	0.0369332	0	0	0	0	0	0	chr12	26328861	26330799	-	1438	-	GO:0008375;GO:0016020;GO:0016740;GO:0016757	-	Core-2/I-branching beta-1,6-N-acetylglucosaminyltransferase family protein
MELO3C002098.2	0	0	0	0	0	0	0	0	0	0	0	0	0	0	0	0	0	0	chr12	26324271	26327157	-	1352	-	GO:0008375;GO:0016020;GO:0016021;GO:0016740;GO:0016757	-	Core-2/I-branching beta-1,6-N-acetylglucosaminyltransferase family protein, putative
MELO3C002099.2	1656	47.0829	2076	59.5279	2197	54.5875	863	25.3346	855	25.8734	1218	30.5564	1781	54.2472	2010	56.7379	2404	71.0169	chr12	26309566	26312063	-	2117	-	GO:0002229;GO:0003700;GO:0005516;GO:0005634;GO:0006355;GO:0006950;GO:0009617;GO:0010112;GO:0010224;GO:0042742;GO:0043565;GO:0071219;GO:0080142;GO:1900426	-	Calmodulin binding protein-like, putative
MELO3C002100.2	0	0	0	0	0	0	2	0.120092	0	0	0	0	8	0.498406	2	0.115475	4	0.241695	chr12	26305482	26306516	+	1035	-	GO:0000166;GO:0004672;GO:0004674;GO:0005524;GO:0006468;GO:0016020;GO:0016021;GO:0016301;GO:0016310;GO:0016740	-	Receptor-like kinase, putative
MELO3C002101.2	26	1.02083	29	1.14834	39	1.33815	5	0.202699	5	0.208947	6	0.207867	68	2.86023	66	2.57276	72	2.93723	chr12	26298943	26301605	+	1533	-	GO:0000166;GO:0004672;GO:0004674;GO:0005524;GO:0006468;GO:0016020;GO:0016021;GO:0016301;GO:0016310	-	Receptor-like kinase
MELO3C002102.2	66	1.87561	78	2.23554	84	2.08611	67	1.96595	51	1.5426	60	1.50453	139	4.23178	61	1.72108	77	2.27359	chr12	26289323	26293620	+	2118	-	GO:0004672;GO:0005524;GO:0006468;GO:0016020;GO:0016021;GO:0016301;GO:0016310	-	Receptor-like kinase
MELO3C002103.2	303	8.62295	262	7.51978	350	8.70446	461	13.5461	240	7.26957	260	6.52889	171	5.21338	243	6.86585	248	7.33313	chr12	26285049	26287706	+	2115	-	GO:0004672;GO:0005524;GO:0006468;GO:0016020;GO:0016021;GO:0016301;GO:0016310	-	Receptor-like kinase
MELO3C002104.2	201	14.0513	141	9.941	213	13.0125	26	1.87669	7	0.520838	23	1.41873	72	5.39217	165	11.4519	152	11.0405	chr12	26282475	26284792	-	861	-	GO:0004672;GO:0005524;GO:0006468;GO:0016020;GO:0016021;GO:0016301;GO:0016310	-	Receptor-like kinase
MELO3C002105.2	686	11.4125	735	12.332	1107	16.094	1733	29.7683	523	9.26064	591	8.67551	1284	22.8839	1037	17.1281	1940	33.5337	chr12	26276347	26280357	+	3618	-	GO:0004672;GO:0005524;GO:0006468;GO:0016301;GO:0016310	-	LEAF RUST 10 DISEASE-RESISTANCE LOCUS RECEPTOR-LIKE PROTEIN KINASE-like 1.2 isoform X2
MELO3C002106.2	0	0	4	0.0804554	7	0.122001	13	0.267699	2	0.042454	13	0.228771	6	0.128193	1	0.0198006	4	0.0828875	chr12	26265397	26269575	-	3018	-	GO:0000166;GO:0003774;GO:0003777;GO:0005524;GO:0005874;GO:0007018;GO:0008017	K11498	Kinesin-like protein
MELO3C002107.2	0	0	0	0	0	0	11	0.787583	8	0.590443	3	0.18356	0	0	0	0	1	0.0720491	chr12	26254646	26256410	-	868	-	GO:0005783;GO:0005789;GO:0016020;GO:0016021	-	Reticulon-like protein
MELO3C002108.2	2	0.293609	4	0.59223	6	0.769753	2	0.303158	0	0	0	0	16	2.51634	14	2.04053	18	2.7456	chr12	26252180	26252589	-	410	-	-	-	Unknown protein
MELO3C002109.2	43	3.89198	23	2.09952	35	2.76841	22	2.05601	25	2.40839	32	2.55567	77	7.46626	96	8.62676	74	6.95918	chr12	26249763	26251456	+	665	-	GO:0005840	-	Ribosomal protein S24/S35, mitochondrial
MELO3C002110.2	533	18.0333	520	17.7436	552	16.321	947	33.0824	897	32.3016	1079	32.2123	737	26.7132	616	20.692	747	26.2599	chr12	26240434	26243052	-	1779	-	GO:0008270;GO:0016874	-	E3 ubiquitin-protein ligase MBR2 isoform X2
MELO3C002111.2	102	2.93609	116	3.36758	83	2.08789	144	4.27988	177	5.42284	158	4.01309	18	0.555076	15	0.428682	19	0.568261	chr12	26236265	26239734	+	2091	-	GO:0016787	-	Alpha/beta hydrolase family protein
MELO3C002112.2	100	3.02614	77	2.35001	67	1.77184	58	1.81224	58	1.8681	57	1.52201	41	1.32918	100	3.00444	79	2.48394	chr12	26232021	26235676	+	1989	-	GO:0005975;GO:0016740;GO:0016758;GO:0030259;GO:0050511	K02563	UDP-N-acetylglucosamine--N-acetylmuramyl- (Pentapeptide) pyrophosphoryl-undecaprenol N-acetylglucosamine transferase
MELO3C002114.2	18	0.743085	7	0.291444	10	0.360767	52	2.21651	56	2.46058	27	0.983518	1	0.0442259	2	0.081973	0	0	chr12	26228160	26230510	+	1458	-	GO:0016020;GO:0016021	-	Transmembrane protein, putative
MELO3C002115.2	1537	34.391	1643	37.0766	2005	39.2054	5446	125.82	5190	123.601	6072	119.882	1571	37.6581	1848	41.0533	1629	37.8719	chr12	26222634	26227823	+	2690	-	GO:0003723;GO:0004652;GO:0005634;GO:0016779;GO:0031123;GO:0043631	K14376	Poly(A) polymerase
MELO3C002116.2	207	19.7453	272	26.167	275	22.9238	542	53.3818	519	52.6921	601	50.5849	185	18.905	273	25.8542	282	27.9491	chr12	26221973	26222603	-	631	-	-	-	Unknown protein
MELO3C002117.2	2141	62.0446	2010	58.7454	2404	60.881	1003	30.0115	1703	52.5274	2049	52.394	1525	47.3443	2078	59.7871	1984	59.7384	chr12	26215587	26217663	+	2077	-	GO:0005524;GO:0006457;GO:0051082	K09496	T-complex protein 1 subunit delta
MELO3C002118.2	5075	141.484	5156	144.969	5886	143.401	4388	126.31	4999	148.333	5954	146.464	4196	125.319	5006	138.56	4927	142.718	chr12	26203720	26214263	+	2159	-	GO:0003746;GO:0003924;GO:0005525;GO:0006414	K03267	Elongation factor 1 alpha
MELO3C002119.2	988	58.6466	902	53.9986	1135	58.8765	1606	98.4308	1800	113.721	2421	126.804	1413	89.8541	1170	68.9519	964	59.4549	chr12	26191904	26193577	+	1014	-	GO:0016020;GO:0016021	-	Chaperone protein DnaJ
MELO3C002120.2	560	27.8565	550	27.5925	697	30.2992	703	36.1072	700	37.0613	812	35.6407	649	34.5854	788	38.917	792	40.9344	chr12	26186901	26190751	+	1210	-	GO:0006397	K12861	pre-mRNA-splicing factor SPF27 homolog
MELO3C002121.2	134	4.18332	136	4.28199	160	4.36513	96	3.09448	82	2.72467	88	2.42411	188	6.2876	171	5.30014	175	5.67648	chr12	26181256	26185966	-	1928	-	GO:0003677;GO:0003824;GO:0004518;GO:0004527;GO:0006281;GO:0016788;GO:0090305	K10746	exonuclease 1
MELO3C002122.2	21	0.703779	32	1.08158	35	1.02505	9	0.311429	11	0.392369	13	0.384426	38	1.3643	46	1.53056	37	1.28838	chr12	26177786	26180995	+	1796	-	GO:0004553;GO:0005975;GO:0008152;GO:0008422;GO:0016787;GO:0016798	K05350	Beta-glucosidase, putative
MELO3C002123.2	2	0.0672513	0	0	1	0.0293854	0	0	2	0.0715789	0	0	1	0.0360231	3	0.100154	3	0.104813	chr12	26172603	26175220	+	1790	-	GO:0005507;GO:0005576;GO:0016491;GO:0046274;GO:0046872;GO:0048046;GO:0052716;GO:0055114	K05909	Laccase
MELO3C002124.2	26	0.757839	23	0.676117	42	1.06983	2	0.0601912	14	0.434326	14	0.360068	68	2.12336	93	2.69129	82	2.48337	chr12	26165406	26169887	+	2065	-	GO:0000165;GO:0000166;GO:0004672;GO:0004674;GO:0004707;GO:0005524;GO:0005622;GO:0006468;GO:0016301;GO:0016310;GO:0016740	K20538	Mitogen-activated protein kinase
MELO3C002125.2	1254	18.5496	1401	20.9009	1617	20.9029	998	15.2429	1085	17.0824	1424	18.5865	1596	25.2918	1862	27.3458	2003	30.7852	chr12	26148586	26160063	-	4069	-	GO:0004672;GO:0005524;GO:0006468;GO:0016301;GO:0016310	-	serine/threonine-protein kinase EDR1 isoform X1
MELO3C002126.2	203	10.6341	137	7.23794	217	9.93399	93	5.03021	92	5.12951	102	4.71472	226	12.683	250	13.0022	200	10.8857	chr12	26146761	26148374	-	1149	-	GO:0000413;GO:0003755;GO:0016853	-	Peptidylprolyl isomerase
MELO3C002127.2	629	29.2577	720	33.7763	654	26.5844	410	19.6912	360	17.8228	410	16.8277	561	27.9552	453	20.92	520	25.1314	chr12	26142286	26146328	-	1294	-	GO:0005737;GO:0006629;GO:0016021;GO:0016627;GO:0055114	-	3-oxo-5-alpha-steroid 4-dehydrogenase (DUF1295)
MELO3C002128.2	0	0	0	0	0	0	0	0	0	0	0	0	0	0	0	0	0	0	chr12	26139802	26141245	+	1334	-	GO:0008152;GO:0016746	-	Thaumatin
MELO3C002129.2	2	0.0852548	0	0	2	0.0745039	0	0	0	0	0	0	1	0.0456667	1	0.0423217	0	0	chr12	26130888	26133735	+	1412	-	GO:0003677	-	WUSCHEL-related homeobox 1-like
MELO3C002130.2	3	0.072199	3	0.0728152	4	0.084126	0	0	1	0.025615	1	0.0212355	3	0.0773466	6	0.143363	2	0.0500109	chr12	26118702	26122272	-	2501	-	GO:0003924;GO:0005200;GO:0005525;GO:0005874;GO:0007010;GO:0007017	K07375	tubulin beta chain-like
MELO3C002131.2	58	1.71802	91	2.71852	125	3.23571	3	0.0917531	2	0.0630542	4	0.104547	106	3.36369	33	0.970484	105	3.23157	chr12	26113668	26118710	+	2032	-	GO:0000234;GO:0006656;GO:0008152;GO:0008168;GO:0016740;GO:0032259	K05929	Phosphoethanolamine n-methyltransferase, putative
MELO3C002132.2	0	0	0	0	0	0	3	0.0604351	0	0	2	0.0344311	0	0	9	0.174335	1	0.0202718	chr12	26099882	26104026	+	3085	-	GO:0006810;GO:0009734;GO:0016020;GO:0016021;GO:0055085	K13947	Auxin efflux carrier component
MELO3C002133.2	10	0.807918	12	0.977776	11	0.776641	6	0.500516	3	0.257972	7	0.49902	3	0.259656	1	0.0802125	1	0.0839445	chr12	26090947	26092424	-	745	-	GO:0005543;GO:0005634;GO:0005829;GO:0005886;GO:0009651;GO:0009789;GO:1901002	-	C2 domain-containing protein
MELO3C002134.2	478	14.7846	489	15.2539	573	15.488	90	2.87424	96	3.16036	104	2.83835	386	12.7902	363	11.1471	336	10.798	chr12	26084103	26089885	-	1946	-	GO:0000723;GO:0000784;GO:0003677;GO:0043047	-	protection of telomeres protein 1a-like isoform X1
MELO3C002135.2	985	23.3782	1102	26.3783	1107	22.9606	2024	49.6003	1964	49.6135	2469	51.7068	918	23.3414	978	23.0456	983	24.2411	chr12	26079674	26083668	+	2536	-	GO:0016874	K14026	ERAD-associated E3 ubiquitin-protein ligase component HRD3A
MELO3C002137.2	122	5.35998	147	6.51345	133	5.1064	19	0.861899	30	1.40284	44	1.70572	116	5.45973	149	6.49926	140	6.39081	chr12	26075788	26079012	-	1370	-	-	-	BnaA06g03740D protein
MELO3C002138.2	107	5.89773	119	6.61513	111	5.34668	45	2.56102	37	2.17064	41	1.99406	48	2.83434	83	4.54207	102	5.84152	chr12	26069154	26070245	-	1092	-	GO:0001522;GO:0003723;GO:0009451;GO:0009982	-	Pseudouridine synthase, catalytic domain-containing protein
MELO3C002139.2	159	6.64597	185	7.79872	181	6.6115	28	1.20842	33	1.46811	16	0.590111	328	14.6874	283	11.7442	327	14.2015	chr12	26064820	26068445	+	1440	-	GO:0005739;GO:0005743;GO:0016020;GO:0016021	K14998	SURF1-like protein
MELO3C002140.2	9	0.223847	12	0.301009	4	0.0869418	0	0	2	0.0529447	2	0.0438925	18	0.479613	20	0.49387	5	0.129212	chr12	26061023	26063442	+	2420	-	GO:0004672;GO:0005524;GO:0006468;GO:0016301;GO:0016310	K08819	Kinase family protein
MELO3C002141.2	0	0	0	0	0	0	0	0	0	0	0	0	5	0.39127	0	0	0	0	chr12	26058598	26059614	+	824	-	GO:0016020;GO:0016021	-	Lipid transfer protein
MELO3C002142.2	0	0	0	0	0	0	3	0.0711612	0	0	5	0.101355	0	0	0	0	0	0	chr12	26053199	26056779	-	2620	-	GO:0000166;GO:0005524;GO:0016020;GO:0016887	-	ABC transporter G family member 17-like
MELO3C002143.2	27	1.11463	41	1.70703	42	1.51522	277	11.8072	202	8.87568	263	9.5802	40	1.76903	51	2.09031	74	3.17411	chr12	26050616	26052581	+	1458	-	GO:0016020;GO:0016021	K13464	Protein TIFY 6B
MELO3C002144.2	42	0.930087	66	1.47404	55	1.06438	28	0.640224	36	0.848518	32	0.625283	95	2.25376	104	2.28656	81	1.86373	chr12	26036623	26039909	+	2718	-	GO:0000166;GO:0004672;GO:0005524;GO:0006468;GO:0016020;GO:0016021;GO:0016301;GO:0016310	-	Receptor-like kinase 1
MELO3C002145.2	0	0	2	0.0832696	0	0	0	0	0	0	0	0	2	0.0884517	3	0.122959	0	0	chr12	26027217	26029242	+	1458	-	GO:0051301	-	cell division cycle-associated protein 7-like
MELO3C002146.2	262	6.63152	266	6.79022	259	5.72891	169	4.4167	170	4.57978	215	4.80179	293	7.94492	240	6.03111	263	6.91659	chr12	26020503	26025542	-	2378	-	GO:0000166;GO:0003676;GO:0003723;GO:0004386;GO:0005524;GO:0016787	K13179	RNA helicase
MELO3C002147.2	462	37.8852	348	28.7804	415	29.7397	72	6.09621	47	4.10213	56	4.05199	335	29.4295	308	25.0757	287	24.4531	chr12	26016441	26017227	-	734	-	-	-	At1g67920
MELO3C002148.2	1397	20.8132	1280	19.2328	1718	22.3679	15116	232.53	13038	206.746	13541	178.01	1429	22.8079	1824	26.98	1599	24.7523	chr12	26010330	26014972	-	4040	-	GO:0003676;GO:0003700;GO:0005634;GO:0006355;GO:0008270	K12236	NF-X1-type zinc finger protein NFXL1
MELO3C002149.2	5495	175.089	4912	157.849	5607	156.129	3695	121.564	3255	110.389	3668	103.127	3493	119.234	5242	165.83	4721	156.297	chr12	26006190	26009346	+	1889	-	GO:0003824;GO:0005737;GO:0006212;GO:0009507;GO:0009536;GO:0009570;GO:0016627;GO:0017113;GO:0043562;GO:0055114	K00207	Dihydropyrimidine dehydrogenase
MELO3C002150.2	276	13.0806	137	6.54834	105	4.3488	128	6.26368	89	4.48946	82	3.42915	619	31.4283	344	16.1865	363	17.8752	chr12	26001994	26003263	+	1270	-	GO:0004672;GO:0005524;GO:0006468;GO:0016301;GO:0016310	K20604	mitogen-activated protein kinase kinase 9
MELO3C002151.2	947	67.4554	1150	82.6143	1086	67.6016	1100	80.902	941	71.3413	1208	75.9253	1201	91.6474	1184	83.7323	1100	81.4112	chr12	25993754	25996594	-	845	-	GO:0005783;GO:0006886;GO:0016020;GO:0016021	-	B-cell receptor-associated 31-like
MELO3C002152.2	2267	63.2594	2433	68.4709	2891	70.4988	1551	44.6874	1350	40.0951	1761	43.3596	2554	76.3492	2372	65.7147	2241	64.9741	chr12	25982753	25993152	-	2157	-	GO:0009507;GO:0009536;GO:0009611;GO:0010193;GO:0010224	-	UV-B-induced protein At3g17800, chloroplastic
MELO3C002153.2	299	11.5959	204	7.97908	269	9.11684	338	13.5347	243	10.0305	366	12.5246	207	8.60028	206	7.93184	181	7.29349	chr12	25969898	25975321	-	1552	-	GO:0003677	-	transcription repressor KAN1-like isoform X1
MELO3C002154.2	98	2.88723	112	3.32785	75	1.93098	432	13.1413	533	16.7135	651	16.9234	183	5.77586	206	6.02555	171	5.23451	chr12	25961714	25965593	-	2043	-	GO:0016020;GO:0016021	K01054	Monoglyceride lipase
MELO3C002155.2	16	0.735705	46	2.1332	18	0.723297	101	4.79518	77	3.76842	144	5.8425	76	3.74376	30	1.36956	43	2.05436	chr12	25954509	25956880	+	1309	-	GO:0003676	-	Zinc finger family protein
MELO3C002156.2	394	16.2097	361	14.9788	487	17.5093	185	7.8587	205	8.97671	180	6.53438	345	15.2058	378	15.4399	353	15.0896	chr12	25936556	25942571	+	1463	-	GO:0016020;GO:0016021	-	AT-rich interactive domain-containing protein 1A
MELO3C002157.2	0	0	0	0	0	0	0	0	0	0	0	0	4	0.258442	5	0.29939	7	0.438648	chr12	25929624	25930621	-	998	-	GO:0003677	-	zinc-finger homeodomain protein 9-like
MELO3C002158.2	792	12.2862	785	12.2815	933	12.6483	154	2.46668	206	3.40129	197	2.69656	480	7.97707	625	9.62601	534	8.60712	chr12	25915254	25923149	-	3880	-	GO:0006396	-	protein NRDE2 homolog isoform X1
MELO3C002159.2	1591	92.7928	1645	96.761	1667	84.965	2340	140.916	2863	177.725	3381	173.997	2182	136.336	2626	152.059	2648	160.467	chr12	25909764	25913967	-	1032	-	GO:0006351;GO:0006355	K01527	Nascent polypeptide-associated complex subunit beta
MELO3C002160.2	5	0.226789	8	0.36596	4	0.158552	5	0.234165	0	0	2	0.0800452	5	0.242959	3	0.135098	6	0.282767	chr12	25902677	25907789	+	1327	-	GO:0005096;GO:0043547;GO:0046872	K12486	ARF-GAP domain 15
MELO3C002161.2	24	1.67194	24	1.68621	56	3.40925	14	1.00702	22	1.63124	14	0.860578	27	2.01504	29	2.00578	28	2.02671	chr12	25899479	25901548	+	864	-	GO:0005515;GO:0005739;GO:0008047;GO:0009507;GO:0009536;GO:0009570;GO:0043085	K05527	SufE-like protein 1, chloroplastic/mitochondrial
MELO3C002162.2	1	0.0840641	2	0.169563	3	0.22039	0	0	0	0	0	0	0	0	0	0	3	0.262033	chr12	25893897	25894612	-	716	-	GO:0008270;GO:0016874	K11982	E3 ubiquitin-protein ligase RING1-like
MELO3C002163.2	1049	38.5936	1185	43.9693	1230	39.5463	1674	63.591	1709	66.9216	2091	67.8808	803	31.6495	843	30.7923	918	35.092	chr12	25884092	25888960	-	1636	-	GO:0008270;GO:0016874	K11982	E3 ubiquitin-protein ligase RING1-like
MELO3C002164.2	731	13.5256	730	13.6224	827	13.3723	1248	23.8426	1704	33.5578	1942	31.706	400	7.92884	561	10.3057	526	10.1123	chr12	25877487	25882031	-	3253	-	-	-	Peptidoglycan-binding LysM domain protein, putative
MELO3C002165.2	1762	38.2454	1776	38.8783	1886	35.7747	1430	32.0486	1745	40.3138	2274	43.5529	2241	52.1106	2385	51.3969	2588	58.3664	chr12	25873775	25878848	+	2773	-	GO:0004576;GO:0006486;GO:0016020;GO:0016740	K07151	dolichyl-diphosphooligosaccharide--protein glycosyltransferase subunit STT3B
MELO3C002167.2	2478	89.4188	2420	88.0711	2739	86.3734	2715	101.157	3136	120.445	3952	125.834	2409	93.1268	2404	86.1265	2890	108.355	chr12	25867931	25872728	+	1668	-	GO:0000166;GO:0003824;GO:0004775;GO:0005739;GO:0006099;GO:0008152;GO:0016874;GO:0048037	K01899	Succinate--CoA ligase [ADP-forming] subunit alpha, mitochondrial
MELO3C002168.2	1054	34.5346	1034	34.1685	1294	37.0518	420	14.209	495	17.2625	584	16.8842	964	33.8378	977	31.7822	886	30.1629	chr12	25859011	25867142	-	1837	-	GO:0003677	-	DNA-binding protein RHL1 isoform X2
MELO3C002170.2	2	0.089635	6	0.2712	4	0.156664	0	0	0	0	2	0.0790916	3	0.144039	7	0.311473	3	0.139699	chr12	25850788	25855886	-	1343	-	GO:0016491;GO:0055114	-	aldo-keto reductase family 4 member C9-like
MELO3C002171.2	781	17.4299	703	15.823	842	16.4216	2282	52.5845	2016	47.887	3058	60.2189	1190	28.4512	1113	24.6611	1321	30.6316	chr12	25845802	25850184	+	2697	-	GO:0055085	-	LOW QUALITY PROTEIN: probable metal-nicotianamine transporter YSL5
MELO3C002172.2	66	1.1809	147	2.65262	133	2.0796	68	1.25625	69	1.31402	87	1.37353	68	1.30343	41	0.728326	38	0.706441	chr12	25832770	25837884	+	3364	-	GO:0003677;GO:0003899;GO:0006351	-	DNA-directed RNA polymerases I, II, and III subunit RPABC4
MELO3C002173.2	182	15.2358	188	15.8724	179	13.0951	52	4.49467	56	4.98961	51	3.76719	165	14.7975	147	12.2176	120	10.4376	chr12	25828966	25830973	+	719	-	GO:0003677;GO:0003899;GO:0006351	K03009	DNA-directed RNA polymerases II, IV and V subunit 12
MELO3C002174.2	804	35.953	945	42.6188	1030	40.2509	573	26.4565	459	21.8462	527	20.7942	661	31.6658	528	23.4416	540	25.0898	chr12	25825500	25827774	-	1346	-	-	-	GEM-like protein 4
MELO3C002175.2	235	16.2769	1004	70.1339	354	21.4273	426	30.4658	430	31.6998	403	24.6298	117	8.6816	125	8.59584	145	10.4351	chr12	25823384	25824252	+	869	-	GO:0004866;GO:0010951	-	Kunitz trypsin inhibitor
MELO3C002176.2	0	0	0	0	0	0	0	0	0	0	0	0	0	0	0	0	0	0	chr12	25819020	25819801	+	782	-	GO:0004866;GO:0010951	-	miraculin-like
MELO3C002177.2	36	2.8624	84	6.73593	92	6.39258	11	0.903067	36	3.04659	69	4.84094	28	2.38504	44	3.4734	61	5.03944	chr12	25814690	25815446	+	757	-	GO:0004866;GO:0010951	-	Kunitz trypsin inhibitor
MELO3C002178.2	119	3.95942	126	4.22811	205	5.96073	134	4.60352	128	4.53293	171	5.02035	185	6.59428	160	5.28542	170	5.87704	chr12	25810297	25814026	+	1809	-	GO:0004693;GO:0005515;GO:0005634;GO:0006260;GO:0007049;GO:0009507;GO:0009536;GO:0009658;GO:0019901;GO:0048229;GO:0051276;GO:0051726;GO:0070182	K10727	CDT1-like protein a, chloroplastic
MELO3C002179.2	3742	123.549	4858	161.765	3675	106.036	4497	153.306	3681	129.356	4054	118.106	2022	71.5201	2265	74.2471	1765	60.5489	chr12	25786991	25794595	-	1823	-	GO:0005773	-	Endosomal targeting BRO1-like domain-containing protein
MELO3C002180.2	410	39.1712	464	44.7087	426	35.5675	225	22.1955	256	26.032	280	23.6044	238	24.3596	298	28.2666	285	28.2913	chr12	25781585	25785378	+	630	-	-	K12871	mRNA splicing factor, Cwf18
MELO3C002181.2	362	22.9839	355	22.7318	372	20.6404	144	9.44012	140	9.46079	178	9.97213	206	14.0118	240	15.1287	223	14.7111	chr12	25777880	25780897	+	948	-	GO:0000398;GO:0005688;GO:0046540	K12627	sm-like protein LSM8
MELO3C002182.2	805	21.6307	700	18.9699	963	22.6132	2110	58.5407	2573	73.5867	3383	80.2103	903	25.994	1094	29.1855	1156	32.2744	chr12	25771682	25777108	+	2240	-	GO:0004674;GO:0005524;GO:0006468;GO:0016301;GO:0016310	K07178	serine/threonine-protein kinase RIO1-like
MELO3C002183.2	0	0	0	0	0	0	0	0	0	0	0	0	0	0	0	0	0	0	chr12	25767948	25770390	-	1602	-	GO:0005215;GO:0006810;GO:0016020;GO:0016021	K09873	Aquaporin-like protein
MELO3C002184.2	32	0.565495	33	0.588144	21	0.324309	50	0.912323	79	1.4859	103	1.60609	56	1.06017	39	0.684255	63	1.15676	chr12	25764504	25770645	+	3406	-	GO:0016787	-	Ser/thr phosphatase family protein
MELO3C002185.2	36	2.45395	50	3.43735	30	1.78708	118	8.3051	142	10.3023	159	9.56341	24	1.75261	34	2.301	50	3.54126	chr12	25762874	25763823	-	883	-	GO:0008270	-	Pentatricopeptide repeat-containing protein
MELO3C002186.2	1207	21.1744	1366	24.1682	1356	20.7885	1620	29.3439	1724	32.1903	2388	36.9649	932	17.5158	978	17.034	935	17.0427	chr12	25755857	25761874	+	3431	-	GO:0016020;GO:0016021	-	Testis-expressed sequence 2 protein
MELO3C002187.2	1966	66.855	2561	87.8316	2715	80.6827	3036	106.599	2796	101.198	4174	125.244	1275	46.4484	1341	45.2745	1198	42.3284	chr12	25749034	25753328	+	1770	-	-	-	Plant/protein (DUF789)
MELO3C002188.2	580	14.1911	1149	28.353	999	21.3606	558	14.0969	327	8.5157	455	9.82319	2477	64.9269	824	20.0166	993	25.2442	chr12	25732175	25736072	-	2460	-	GO:0000166;GO:0005524;GO:0016020;GO:0016021;GO:0016887	-	ABC transporter G family member
MELO3C002189.2	313	11.8786	288	11.0231	288	9.55154	76	2.97806	70	2.8275	102	3.41565	353	14.3518	347	13.0745	353	13.9194	chr12	25708847	25712824	-	1586	-	GO:0008270;GO:0016491;GO:0046872;GO:0055114	K00001	Alcohol dehydrogenase family protein
MELO3C002190.2	3	0.0928856	2	0.0624522	2	0.054115	0	0	2	0.0659085	0	0	5	0.165847	1	0.0307399	3	0.0965102	chr12	25704453	25707382	+	1944	-	GO:0006855;GO:0015238;GO:0015297;GO:0016020;GO:0016021;GO:0055085	K03327	Protein DETOXIFICATION
MELO3C002191.2	0	0	0	0	0	0	0	0	0	0	0	0	0	0	0	0	0	0	chr12	25702728	25704064	-	1118	-	GO:0016491;GO:0055114	-	Short-chain dehydrogenase/reductase
MELO3C002192.2	0	0	0	0	0	0	0	0	0	0	0	0	0	0	0	0	0	0	chr12	25695985	25698703	-	1789	-	GO:0004497;GO:0005506;GO:0016491;GO:0016705;GO:0020037;GO:0046872;GO:0055114	-	Cytochrome P450
MELO3C002193.2	0	0	0	0	0	0	0	0	0	0	0	0	0	0	0	0	0	0	chr12	25692944	25694639	+	1607	-	GO:0016740;GO:0016746;GO:0016747	-	BAHD acyltransferase At5g47980-like
MELO3C002194.2	108	4.15103	127	4.92296	125	4.19858	45	1.78585	79	3.23179	92	3.12013	93	3.82935	80	3.05279	80	3.19482	chr12	25688059	25692468	-	1566	-	GO:0016020;GO:0016021	-	Plant/F12B17-70 protein
MELO3C002196.2	0	0	0	0	0	0	0	0	0	0	0	0	0	0	0	0	0	0	chr12	25686407	25687273	+	867	-	GO:0008168;GO:0016740;GO:0032259;GO:0045492	K18801	glucuronoxylan 4-O-methyltransferase 1
MELO3C002197.2	0	0	0	0	0	0	0	0	0	0	0	0	0	0	0	0	0	0	chr12	25678679	25679295	-	482	-	GO:0046983	-	transcription factor PRE3-like
MELO3C002198.2	396	13.3083	482	16.3368	510	14.9782	783	27.17	712	25.4678	943	27.9635	479	17.2454	431	14.3807	419	14.6308	chr12	25669034	25673442	-	1791	-	GO:0004672;GO:0005524;GO:0006468;GO:0016301;GO:0016310	K04733	protein kinase 2B, chloroplastic-like
MELO3C002199.2	11	0.918292	9	0.757742	25	1.82385	228	19.6527	284	25.2343	267	19.6676	7	0.626032	7	0.580178	10	0.867387	chr12	25667496	25668216	-	721	-	GO:0008270;GO:0016874	-	E3 ubiquitin-protein ligase
MELO3C002200.2	464	8.45026	444	8.15503	547	8.70562	108	2.03084	148	2.86879	172	2.76397	455	8.87716	482	8.71513	451	8.53401	chr12	25657076	25665825	+	3305	-	GO:0000166;GO:0005215;GO:0005524;GO:0006810;GO:0016020;GO:0016021;GO:0016887	-	ABC transporter A family protein
MELO3C002201.2	1364	31.6985	1393	32.6487	1524	30.9506	170	4.07918	158	3.9081	250	5.12645	1082	26.9378	1056	24.3648	804	19.4135	chr12	25650182	25655866	+	2590	-	-	-	Protein IQ-DOMAIN 31
MELO3C002202.2	0	0	0	0	0	0	0	0	0	0	0	0	0	0	0	0	0	0	chr12	25640685	25644463	+	2354	-	GO:0003700;GO:0006355;GO:0043565	-	WRKY transcription factor, putative
MELO3C002203.2	3801	92.3252	4296	105.239	4386	93.1003	9516	238.658	10709	276.857	12211	261.713	3152	82.0198	3490	84.1632	2922	73.7441	chr12	25626149	25631825	-	2478	-	GO:0003842;GO:0005739;GO:0008152;GO:0008270;GO:0009507;GO:0009651;GO:0010133;GO:0016491;GO:0050897;GO:0055114;GO:0072593	K00294	Aldehyde dehydrogenase
MELO3C002204.2	1494	30.8169	1675	34.8453	1858	33.4923	2894	61.6363	3073	67.466	3245	59.0616	1187	26.2301	1264	25.8857	1228	26.3185	chr12	25618431	25625396	-	2918	-	GO:0005634;GO:0016787	K17602	p-loop containing nucleoside triphosphate hydrolases superfamily protein, putative isoform 1
MELO3C002205.2	6	0.207313	27	0.940871	25	0.754876	62	2.21191	58	2.13298	40	1.21952	9	0.333141	9	0.30874	4	0.143602	chr12	25613175	25617769	+	1742	-	GO:0016829	K01728	pectate lyase-like
MELO3C002206.2	309	5.63938	299	5.50345	343	5.4705	830	15.6405	633	12.2959	808	13.0118	265	5.18119	263	4.76544	252	4.77857	chr12	25607685	25610982	-	3298	-	GO:0016020;GO:0016021	-	C2 domain-containing family protein
MELO3C002207.2	31	3.79245	34	4.19496	43	4.59714	26	3.28422	29	3.77608	35	3.77815	16	2.09695	19	2.30774	20	2.54222	chr12	25605788	25607206	-	492	-	-	-	BnaA06g22250D protein
MELO3C002208.2	4845	268.033	4163	232.269	6738	325.751	761	43.469	1005	59.1759	1037	50.6204	4351	257.866	3796	208.495	3217	184.914	chr12	25604519	25605688	+	1088	-	GO:0016020;GO:0016021	-	DUF1118-domain-containing protein
MELO3C002209.2	6992	244.111	7641	269.046	7657	233.617	1271	45.8175	1743	64.7691	2067	63.6765	3263	122.043	4110	142.463	2776	100.7	chr12	25596148	25598464	-	1724	-	GO:0003677;GO:0003700;GO:0005634;GO:0006355;GO:0043565	K09338	Homeobox leucine zipper family protein
MELO3C002210.2	6	0.270314	3	0.13631	1	0.0393711	0	0	0	0	1	0.039753	2	0.0965289	2	0.0894585	7	0.327672	chr12	25586938	25590786	+	1336	-	GO:0016020;GO:0016021	-	HPP
MELO3C002211.2	0	0	3	0.0847027	3	0.073395	0	0	0	0	0	0	1	0.0299913	1	0.0277946	5	0.145439	chr12	25581679	25586300	+	2150	-	GO:0000166;GO:0004672;GO:0004674;GO:0005524;GO:0006468;GO:0016020;GO:0016021;GO:0016301;GO:0016310;GO:0016740	-	Receptor-like protein kinase
MELO3C002212.2	2	0.0573784	0	0	5	0.125357	0	0	0	0	0	0	2	0.0614693	0	0	1	0.0298087	chr12	25578563	25580818	-	2098	-	GO:0005215;GO:0006810;GO:0016020	K14638	protein NRT1/ PTR FAMILY 2.8
MELO3C002213.2	569	9.66367	487	8.3416	797	11.829	68	1.19245	71	1.28343	94	1.40867	658	11.972	736	12.4103	545	9.61725	chr12	25569296	25575112	+	3544	-	GO:0000166;GO:0005524;GO:0006754;GO:0006810;GO:0006811;GO:0008553;GO:0015992;GO:0016020;GO:0016021;GO:0016787;GO:0016887;GO:0046872;GO:1902600	K01535	Plasma membrane ATPase
MELO3C002214.2	97	3.17133	66	2.17623	61	1.74285	77	2.59932	73	2.54025	111	3.20218	145	5.07865	120	3.89516	123	4.1783	chr12	25556201	25559798	+	1841	-	GO:0006457;GO:0051082	K09510	dnaJ homolog subfamily B member 13
MELO3C002215.2	1100	28.6123	1016	26.6529	1180	26.8227	3551	95.3698	3798	105.148	4501	103.305	793	22.0975	732	18.9037	835	22.5669	chr12	25548828	25553965	+	2314	-	GO:0004672;GO:0004683;GO:0005509;GO:0005516;GO:0005524;GO:0005634;GO:0005737;GO:0005886;GO:0006468;GO:0009738;GO:0009931;GO:0016301;GO:0016310;GO:0018105;GO:0035556;GO:0046777	K13412	Calcium-dependent protein kinase
MELO3C002216.2	8	0.472078	13	0.773673	12	0.618821	4	0.243716	1	0.0628069	1	0.0520686	10	0.63217	13	0.761625	11	0.674436	chr12	25517123	25541672	-	1020	-	GO:0005516;GO:0006952;GO:0009607;GO:0016020;GO:0016021	K08472	MLO-like protein
MELO3C002218.2	1382	34.6883	1460	36.9588	1711	37.5305	1382	35.8164	1443	38.5501	1881	41.6597	1150	30.9231	1334	33.2434	1426	37.1894	chr12	25508347	25513899	-	2398	-	GO:0006396	K12866	WW domain-binding protein 11 isoform X1
MELO3C002219.2	98	2.11496	94	2.04594	126	2.37633	70	1.55981	41	0.941766	57	1.08543	184	4.25406	146	3.12826	152	3.40834	chr12	25502925	25507314	-	2789	-	GO:0003824;GO:0005975;GO:0016901;GO:0048038;GO:0055114	-	HIPL1 protein-like isoform X1
MELO3C002220.2	308	10.1804	224	7.46711	321	9.27212	42	1.43338	47	1.65347	54	1.57493	198	7.01115	356	11.6826	323	11.0928	chr12	25499308	25501128	+	1821	-	GO:0005524	K08900	AAA-ATPase At3g28580-like
MELO3C002221.2	2	0.0782195	3	0.118331	3	0.102534	0	0	0	0	0	0	8	0.335186	16	0.621269	21	0.853354	chr12	25495542	25497080	+	1539	-	GO:0005524	K08900	AAA-ATPase At3g28580-like
MELO3C002222.2	2547	67.8635	2302	61.8591	2466	57.4197	213	5.85985	229	6.49422	290	6.81801	2641	75.3852	2784	73.6463	2813	77.8757	chr12	25490745	25494042	+	2259	-	GO:0005524	K08900	AAA-ATPase At3g28580-like
MELO3C002223.2	416	9.41316	288	6.57242	384	7.59335	535	12.4996	284	6.83982	303	6.04975	852	20.6534	780	17.5231	952	22.3822	chr12	25484338	25487783	+	2660	-	GO:0006486;GO:0008378;GO:0016020;GO:0016740;GO:0016757;GO:0030246	-	hydroxyproline O-galactosyltransferase GALT6
MELO3C002224.2	239	11.6105	287	14.0613	223	9.46711	214	10.7341	194	10.0309	266	11.4021	297	15.4568	134	6.46296	230	11.6093	chr12	25476694	25478117	-	1239	-	GO:0007017;GO:0030286	-	Dynein light chain
MELO3C002225.2	41	0.875722	10	0.215414	25	0.466641	20	0.441075	7	0.159135	9	0.16962	7	0.160174	3	0.0636178	9	0.199733	chr12	25473115	25476281	+	2818	-	GO:0016020;GO:0016021	-	Zein-binding protein
MELO3C002226.2	531	17.7758	483	16.3069	598	17.4943	73	2.52323	77	2.74352	114	3.36737	204	7.31601	320	10.6355	272	9.46079	chr12	25467981	25471976	+	1798	-	GO:0016301;GO:0016310	K06947	polynucleotide 5'-hydroxyl-kinase NOL9
MELO3C002227.2	449	37.4311	330	27.7454	483	35.1879	85	7.31653	86	7.63078	119	8.75358	153	13.6643	255	21.1058	214	18.5364	chr12	25465298	25466019	-	722	-	-	-	Unknown protein
MELO3C002228.2	4559	198.413	4754	208.666	6268	238.391	2357	105.916	3395	157.263	3837	147.349	3200	149.198	4114	177.763	3242	146.602	chr12	25459099	25461206	+	1383	-	GO:0003677	-	transcription factor MYB1R1
MELO3C002229.2	1872	41.7781	1640	36.9128	2176	42.4387	372	8.57206	482	11.4492	521	10.2597	1922	45.9522	1902	42.1432	1798	41.6924	chr12	25447942	25453922	+	2697	-	GO:0003723;GO:0004519;GO:0006351;GO:0006355;GO:0009295;GO:0009451;GO:0009507;GO:0009508;GO:0009536;GO:0042793;GO:0045893;GO:0090305	-	Pentatricopeptide repeat-containing protein At1g74850, chloroplastic
MELO3C002230.2	794	24.3086	845	26.0908	1038	27.7714	1152	36.416	931	30.3371	1302	35.1725	656	21.5156	775	23.5568	670	21.3128	chr12	25440554	25444851	-	1966	-	-	-	At1g74860
MELO3C002231.2	452	35.8916	412	32.9946	473	32.8228	212	17.3816	319	26.9606	461	32.3004	406	34.5375	423	33.348	414	34.157	chr12	25437269	25439216	-	758	-	GO:0016020;GO:0016021	-	AT3g47831/T23J7
MELO3C002232.2	1227	33.1328	1261	34.3415	1353	31.928	237	6.60787	290	8.33481	298	7.10039	916	26.4984	1247	33.4314	1069	29.9927	chr12	25430520	25435800	-	2229	-	GO:0000380;GO:0000398;GO:0016301;GO:0016310	-	serine/threonine-protein kinase fray2
MELO3C002233.2	4226	310.577	4015	297.588	5196	333.71	3141	238.346	3225	252.263	4149	269.052	3082	242.651	3837	279.967	3392	259.012	chr12	25428639	25430382	-	819	-	GO:0016020;GO:0016021	-	B12d-like protein
MELO3C002234.2	161	4.57534	156	4.47108	170	4.22189	96	2.81688	97	2.93396	104	2.60786	106	3.22711	133	3.75253	121	3.57279	chr12	25423238	25427695	+	2118	-	GO:0005680;GO:0030071	K03355	anaphase-promoting complex subunit 8
MELO3C002235.2	220	4.87188	182	4.06477	224	4.33493	18	0.411573	25	0.589248	34	0.664363	181	4.29401	196	4.30928	186	4.27968	chr12	25418852	25421958	-	2718	-	GO:0003723;GO:0004519;GO:0009451;GO:0043231;GO:0090305	-	Pentatricopeptide repeat-containing family protein
MELO3C002236.2	307	11.513	284	10.7413	256	8.38975	28	1.08419	42	1.67642	62	2.0516	255	10.2447	215	8.00501	227	8.84503	chr12	25413379	25416529	-	1605	-	GO:0003677;GO:0003700;GO:0005634;GO:0005667;GO:0006351;GO:0006355	K09391	E2F transcription factor-like E2FE
MELO3C002238.2	92	4.61841	94	4.75908	144	6.31724	48	2.48797	46	2.4578	56	2.48053	62	3.33431	79	3.93737	62	3.23386	chr12	25394875	25398094	+	1199	-	GO:0005737;GO:0006364;GO:0008168;GO:0008649;GO:0016740;GO:0031167;GO:0032259	K03501	Ribosomal RNA small subunit methyltransferase G
MELO3C002239.2	1003	69.8732	649	45.5979	944	57.4701	1294	93.0773	1439	106.698	1672	102.778	403	30.0764	892	61.6949	853	61.7424	chr12	25386792	25387655	-	864	-	-	-	Unknown protein
MELO3C002240.2	82	2.58137	34	1.07946	43	1.18294	844	27.4333	262	8.77852	289	8.02761	323	10.893	230	7.1885	337	11.0228	chr12	25376445	25378356	-	1912	-	GO:0004842;GO:0016567;GO:0016740	-	RING-type E3 ubiquitin transferase
MELO3C002241.2	54	2.75445	58	2.98373	61	2.71914	5	0.263337	3	0.162872	14	0.630118	46	2.51368	53	2.68406	41	2.17295	chr12	25371558	25373876	-	1180	-	GO:0003824;GO:0006281;GO:0006284	K10773	Protein ROS1
MELO3C002242.2	0	0	0	0	1	0.0470902	0	0	1	0.0573528	0	0	0	0	0	0	0	0	chr12	25369164	25370763	+	1117	-	GO:0004601;GO:0005576;GO:0006979;GO:0016491;GO:0020037;GO:0042744;GO:0046872;GO:0055114	K00430	Peroxidase
MELO3C002243.2	0	0	0	0	0	0	0	0	4	0.406105	2	0.168336	3	0.306567	2	0.189408	5	0.495552	chr12	25366879	25368175	-	631	-	GO:0005576;GO:0009740	-	Gibberellin-regulated protein 2
MELO3C002244.2	6	0.386659	12	0.779917	20	1.12633	18	1.1977	24	1.64616	13	0.739218	32	2.20921	25	1.59953	36	2.41048	chr12	25361479	25362579	+	934	-	GO:0016301;GO:0016310	-	Serine/threonine-protein kinase TAO3
MELO3C002245.2	804	17.4577	973	21.3076	818	15.5219	556	12.4654	500	11.5554	666	12.7602	899	20.9122	1077	23.2178	993	22.4029	chr12	25347930	25354112	-	2772	-	GO:0004252;GO:0006508;GO:0008233	-	protease Do-like 9
MELO3C002246.2	786	30.6209	965	37.9152	871	29.6533	805	32.381	795	32.9645	1035	35.5785	582	24.2901	530	20.4996	544	22.0201	chr12	25345558	25347573	-	1545	-	GO:0016020;GO:0016021	-	RING-H2 finger ATL48-like protein
MELO3C002247.2	19	2.1783	16	1.85001	13	1.30247	66	7.81282	52	6.3453	43	4.34996	4	0.491286	4	0.455301	6	0.714727	chr12	25343932	25344456	-	525	-	GO:0046983	-	Transcription factor
MELO3C002248.2	1	0.0433957	1	0.0437661	2	0.0758468	0	0	3	0.138565	0	0	33	1.53416	34	1.46488	60	2.70535	chr12	25338184	25341722	-	1387	-	GO:0005524	K10576	Ubiquitin-conjugating enzyme, E2
MELO3C002249.2	3	0.124274	2	0.0835562	0	0	0	0	0	0	1	0.0365519	5	0.22189	1	0.0411275	1	0.043041	chr12	25333227	25334679	-	1453	-	GO:0008270	-	RING-H2 finger protein ATL46-like
MELO3C002250.2	395	23.1725	168	9.93977	238	12.2015	112	6.78413	106	6.6186	111	5.74582	159	9.99272	240	13.9785	234	14.2632	chr12	25331311	25332336	+	1026	-	GO:0016020;GO:0016021	-	NHL domain-containing protein, putative
MELO3C002251.2	248	48.3077	244	47.9342	291	49.5357	236	47.4654	304	63.0265	356	61.1882	166	34.6405	211	40.8058	217	43.9187	chr12	25327441	25327749	+	309	-	-	-	Unknown protein
MELO3C002252.2	28	1.56048	17	0.955519	33	1.60722	82	4.7186	104	6.16904	125	6.14699	15	0.895574	18	0.995972	16	0.926498	chr12	25323226	25325750	+	1080	-	GO:0003824;GO:0006596;GO:0016740	K00797	spermidine synthase 1-like
MELO3C002253.2	86	2.26833	31	0.824632	18	0.414897	2431	66.2053	3245	91.0976	3262	75.9179	199	5.62304	94	2.46156	74	2.02798	chr12	25316465	25318746	-	2282	-	GO:0004842;GO:0016567;GO:0016740	-	RING-type E3 ubiquitin transferase
MELO3C002255.2	269	17.3724	196	12.766	241	13.6014	1007	67.1486	728	50.0407	740	42.1689	128	8.8558	229	14.6831	206	13.8229	chr12	25311571	25312502	+	932	-	GO:0008270;GO:0016020;GO:0016021	-	RING-H2 finger protein ATL80
MELO3C002256.2	0	0	0	0	0	0	0	0	0	0	0	0	0	0	0	0	0	0	chr12	25307536	25308775	-	914	-	GO:0005886;GO:0006810;GO:0008643;GO:0016020;GO:0016021	K15382	Bidirectional sugar transporter SWEET
MELO3C002257.2	0	0	0	0	0	0	86	6.8259	35	2.86361	66	4.4767	0	0	0	0	4	0.319482	chr12	25302719	25304034	+	783	-	GO:0003677;GO:0046983	-	Transcription factor bHLH36
MELO3C002259.2	331	7.02994	315	6.74722	470	8.72332	249	5.46038	128	2.89346	165	3.09215	447	10.1705	410	8.64534	385	8.4959	chr12	25290501	25298208	-	2834	-	GO:0008270;GO:0016874	K16284	E3 ubiquitin-protein ligase SIS3-like
MELO3C002260.2	0	0	0	0	0	0	0	0	0	0	0	0	0	0	0	0	0	0	chr12	25294082	25294243	+	162	-	-	-	Unknown protein
MELO3C002261.2	137	4.51589	107	3.55711	136	3.91762	12	0.408417	8	0.280671	14	0.407196	153	5.40287	134	4.38533	111	3.80164	chr12	25280259	25282219	-	1826	-	GO:0004672;GO:0005524;GO:0006468;GO:0016301;GO:0016310	-	serine/threonine-protein kinase HT1-like
MELO3C002262.2	353	16.7961	321	15.4038	295	12.2664	295	14.4929	393	19.9026	411	17.2555	175	8.92034	287	13.5578	280	13.8425	chr12	25268058	25269322	+	1265	-	GO:0016874	-	DNA ligase 1-like
MELO3C002263.2	795	23.1164	1077	31.5835	952	24.1908	6067	182.149	5271	163.129	5220	133.93	314	9.78122	343	9.90198	345	10.4231	chr12	25258137	25261028	+	2070	-	GO:0003950;GO:0016740;GO:0016757	-	Poly [ADP-ribose] polymerase
MELO3C002264.2	0	0	1	0.038542	0	0	0	0	3	0.122025	3	0.101162	2	0.081881	12	0.455301	3	0.119121	chr12	25246614	25248500	-	1575	-	GO:0003677;GO:0005634;GO:0006355	-	dof zinc finger protein DOF5.6
MELO3C002265.2	1747	36.3973	2081	43.7259	2128	38.7443	1887	40.5927	2059	45.658	2826	51.9518	1629	36.3586	1803	37.2946	1865	40.3719	chr12	25239417	25244002	+	2889	-	GO:0003676;GO:0016301;GO:0016310	-	Serine/threonine-protein kinase ATM
MELO3C002267.2	2242	44.3609	2139	42.6841	2572	44.4729	988	20.1846	1103	23.2287	1257	21.9458	1893	40.126	1906	37.4422	1941	39.9038	chr12	25224963	25237892	+	3042	-	GO:0004594;GO:0005524;GO:0015937;GO:0016301;GO:0016310	K09680	pantothenate kinase 2
MELO3C002268.2	1137	66.3139	1326	77.997	1461	74.4654	2819	169.761	3295	204.542	3963	203.948	669	41.8004	632	36.5962	612	37.0869	chr12	25220616	25223436	+	1032	-	GO:0005506;GO:0005739;GO:0005759;GO:0016226;GO:0046872;GO:0051536;GO:0051537	-	Iron-sulfur cluster assembly protein
MELO3C002269.2	17285	240.44	10349	145.186	13878	168.703	630	9.04851	606	8.97209	583	7.15579	5528	82.3787	8663	119.641	5911	85.4324	chr12	25204355	25210898	-	4327	-	GO:0005452;GO:0006820;GO:0015698;GO:0016020;GO:0016021	-	Boron transporter
MELO3C002270.2	1038	35.6401	998	34.5591	1120	33.6062	850	30.1343	1051	38.4086	1185	35.9015	2705	99.4991	2494	85.0184	2589	92.3631	chr12	25198315	25201846	+	1753	-	GO:0005215;GO:0006810;GO:0016021	K15283	triose phosphate/phosphate translocator, non-green plastid, chloroplastic
MELO3C002271.2	127	5.44065	63	2.72194	95	3.55657	59	2.60975	97	4.42286	117	4.42268	63	2.89133	97	4.12566	72	3.20483	chr12	25189536	25193649	-	1405	-	GO:0019005	K06195	F-box protein SKIP16
MELO3C002272.2	6	0.24584	9	0.371908	13	0.465485	32	1.35379	33	1.43913	50	1.80769	16	0.702315	21	0.854271	10	0.425722	chr12	25181181	25184448	-	1469	-	GO:0016020;GO:0016021	-	Transmembrane protein, putative
MELO3C002273.2	419	17.5869	464	19.6419	464	17.0197	275	11.9181	363	16.2168	462	17.1107	355	15.9629	418	17.4191	445	19.407	chr12	25177743	25180395	+	1434	-	GO:0016020;GO:0016021	-	Mitochondrial import inner membrane translocase subunit Tim17/Tim22/Tim23 family protein
MELO3C002274.2	81	4.02259	87	4.35743	87	3.77573	54	2.76895	58	3.06573	87	3.81235	49	2.60692	76	3.74722	70	3.61197	chr12	25172677	25176512	-	1212	-	GO:0016020;GO:0016021;GO:0016301;GO:0016310;GO:0030247	-	Wall-associated receptor kinase 3-like protein
MELO3C002275.2	1058	33.7472	1018	32.7484	1467	40.8924	284	9.35341	356	12.0861	473	13.3127	460	15.7188	581	18.3993	467	15.4772	chr12	25167990	25171741	-	1887	-	GO:0000162;GO:0004048;GO:0008152;GO:0016740;GO:0016757	K00766	anthranilate phosphoribosyltransferase, chloroplastic
MELO3C002276.2	183	10.7776	133	7.89978	226	11.6317	81	4.92558	71	4.45057	93	4.8329	187	11.7984	234	13.6824	177	10.8311	chr12	25165087	25167592	+	1022	-	GO:0005623;GO:0009055;GO:0015035;GO:0045454;GO:0055114	K03676	glutaredoxin
MELO3C002277.2	97	1.19395	107	1.32828	126	1.35533	73	0.927764	56	0.733647	81	0.879736	197	2.59771	170	2.07749	145	1.85442	chr12	25156928	25164336	+	4890	-	GO:0016020;GO:0016021	-	Glutathione transport system permease protein gsiD
MELO3C002280.2	6	0.114903	1	0.0193139	10	0.167355	1	0.0197733	0	0	0	0	14	0.287222	33	0.627434	11	0.218875	chr12	25151508	25154650	+	3143	-	GO:0016301;GO:0016310	-	LRR receptor-like serine/threonine-protein kinase GSO1
MELO3C002281.2	926	33.1366	974	35.1518	972	30.3965	554	20.4695	700	26.6612	888	28.039	1571	60.226	1408	50.0236	1466	54.5075	chr12	25142097	25147541	+	1682	-	GO:0016020;GO:0016021	-	Embryo defective 2759 protein, putative
MELO3C002282.2	337	12.1171	307	11.1326	403	12.6629	28	1.0395	43	1.64559	48	1.52287	290	11.1706	425	15.1716	400	14.9435	chr12	25138922	25141000	-	1674	-	GO:0016787	K01510	Nucleoside phosphatase GDA1/CD39
MELO3C002283.2	170	9.11968	163	8.81879	211	9.89176	12	0.664679	33	1.88421	27	1.27805	109	6.26423	99	5.27279	111	6.18698	chr12	25137513	25138815	+	1122	-	-	-	heme-binding protein 2-like
MELO3C002284.2	25	0.542056	11	0.24054	52	0.985298	28	0.626848	22	0.507705	21	0.401769	39	0.905898	53	1.14092	33	0.743435	chr12	25132193	25137439	+	2776	-	GO:0005886	K18726	Plant UBX domain-containing protein 10
MELO3C002285.2	81	2.00798	65	1.6251	113	2.44801	106	2.71319	57	1.50395	72	1.57493	70	1.85902	57	1.40289	65	1.67422	chr12	25121415	25125078	-	2428	-	GO:0016020;GO:0016021	-	Carboxyl-terminal peptidase, putative (DUF239)
MELO3C002286.2	16	0.282085	12	0.213369	12	0.184885	10	0.182037	5	0.0938241	10	0.155565	17	0.321084	21	0.367582	13	0.238138	chr12	25115687	25119180	+	3414	-	GO:0000166;GO:0004672;GO:0004674;GO:0005524;GO:0006468;GO:0016020;GO:0016021;GO:0016301;GO:0016310;GO:0016740	-	Receptor protein kinase, putative
MELO3C002287.2	0	0	2	0.0422433	10	0.183019	5	0.10812	5	0.111453	11	0.203274	16	0.358977	17	0.353476	9	0.195841	chr12	25104068	25107533	-	2874	-	GO:0003824	K06617	Raffinose synthase family protein
MELO3C002288.2	0	0	0	0	0	0	0	0	0	0	0	0	1	0.0598712	0	0	0	0	chr12	25100481	25102341	-	1077	-	GO:0003824;GO:0008483;GO:0016740;GO:0016846	K16903	tryptophan aminotransferase-related protein 2
MELO3C002289.2	1	0.0624377	0	0	1	0.0545641	4	0.257873	4	0.265822	0	0	1	0.0668893	4	0.24796	0	0	chr12	25099173	25100136	+	964	-	GO:0012511;GO:0016021	-	oleosin 5-like
MELO3C002290.2	3	0.262838	1	0.0883604	3	0.229693	0	0	0	0	0	0	1	0.0938593	0	0	1	0.0910315	chr12	25094369	25095055	+	687	-	-	-	LOB domain-containing protein 25
MELO3C002291.2	107	5.40749	102	5.19879	113	4.99058	56	2.92213	54	2.90462	63	2.80934	117	6.33444	103	5.16801	73	3.83318	chr12	25089928	25091118	+	1191	-	GO:0008168;GO:0009507;GO:0016740;GO:0032259	-	S-adenosyl-L-methionine-dependent methyltransferase superfamily protein
MELO3C002292.2	0	0	0	0	0	0	0	0	0	0	0	0	0	0	0	0	0	0	chr12	25075997	25077641	-	1399	-	GO:0003677	K09422	transcription factor MYB86-like
MELO3C002293.2	611	14.8052	389	9.50632	466	9.86775	727	18.1889	512	13.2046	537	11.4815	1171	30.3976	1021	24.5625	1024	25.7808	chr12	25066859	25069342	+	2484	-	GO:0005634;GO:0005737	-	Armadillo/beta-catenin repeat family protein
MELO3C002294.2	2302	171.482	2406	180.758	2541	165.416	2927	225.131	3272	259.424	3960	260.291	2631	209.963	3167	234.226	3250	251.548	chr12	25063260	25064067	+	808	-	GO:0003735;GO:0005622;GO:0005840;GO:0006412;GO:0015934;GO:0030529	K02900	60S ribosomal protein L27A
MELO3C002295.2	34	2.61695	21	1.63015	37	2.48874	17	1.35103	8	0.655377	26	1.7658	14	1.1544	27	2.06327	29	2.31921	chr12	25060629	25062834	+	782	-	GO:0005680;GO:0090266	-	(3R)-hydroxymyristoyl-[acyl-carrier-protein] dehydratase
MELO3C002296.2	1293	16.0863	1221	15.3202	1477	16.0583	2797	35.9294	3313	43.8696	3897	42.78	1183	15.7671	1234	15.2422	1030	13.3143	chr12	25055280	25061466	-	4838	-	GO:0016020;GO:0016021;GO:0016874	-	C2 and GRAM domain-containing protein
MELO3C002297.2	7336	151.424	8319	173.18	8741	157.673	10922	232.776	9404	206.601	12159	221.456	5741	126.95	4762	97.5888	4500	96.5102	chr12	25049726	25054325	-	2916	-	GO:0008270	K17987	protein NBR1 homolog
MELO3C002298.2	58	4.41342	61	4.68131	74	4.92084	13	1.02139	7	0.56693	12	0.805714	36	2.93467	54	4.07958	59	4.6647	chr12	25048507	25049297	+	791	-	GO:0016853	-	Methylthioribose-1-phosphate isomerase
MELO3C002299.2	24	0.7692	40	1.29294	34	0.952286	124	4.10345	45	1.53506	41	1.15948	33	1.13306	40	1.27281	30	0.99902	chr12	25042820	25047370	-	1878	-	GO:0005524	-	pachytene checkpoint protein 2 homolog
MELO3C002300.2	0	0	1	0.10763	4	0.373048	5	0.550953	8	0.908696	7	0.659166	5	0.571643	5	0.529772	1	0.110884	chr12	25041741	25042433	-	564	-	-	-	Unknown protein
MELO3C002301.2	214	6.19559	314	9.16831	334	8.45037	31	0.926682	44	1.35583	44	1.12402	113	3.50476	123	3.53548	111	3.339	chr12	25034432	25037088	-	2079	-	GO:0005515;GO:0005634	-	Protein DEHYDRATION-INDUCED 19
MELO3C002302.2	403	7.0822	520	9.21631	462	7.09521	169	3.06655	226	4.22723	276	4.27981	265	4.98907	196	3.41974	160	2.92151	chr12	25031011	25035891	+	3425	-	GO:0004672;GO:0004674;GO:0005524;GO:0005829;GO:0006468;GO:0016301;GO:0016310;GO:0035556	K08867	Kinase family protein
MELO3C002304.2	0	0	0	0	0	0	0	0	0	0	0	0	0	0	0	0	0	0	chr12	25024725	25029056	+	2021	-	GO:0004309;GO:0016787	-	Protein prune like
MELO3C002305.2	25	1.14954	17	0.788358	12	0.482198	5	0.237385	4	0.195762	23	0.933178	9	0.44334	15	0.684778	21	1.00329	chr12	25018495	25019908	-	1309	-	GO:0010167;GO:0015706	-	high-affinity nitrate transporter 3.1-like
MELO3C002306.2	240	10.1515	262	11.1766	310	11.4588	86	3.75593	77	3.46652	112	4.18012	186	8.42834	163	6.84512	184	8.08651	chr12	25014810	25018064	+	1423	-	GO:0016787;GO:0047631;GO:0047734	K01517	Manganese-dependent ADP-ribose/CDP-alcohol diphosphatase
MELO3C002307.2	2087	40.4561	2105	41.1533	2108	35.7103	181	3.62277	182	3.75507	198	3.38672	1752	36.3837	1469	28.2721	1761	35.4688	chr12	25007432	25013700	+	3105	-	GO:0008987;GO:0009435;GO:0019805;GO:0051539	K03517	quinolinate synthase, chloroplastic
MELO3C002308.2	135	5.32479	91	3.61994	73	2.51624	2	0.0814515	7	0.293867	4	0.139214	62	2.61982	68	2.66289	81	3.31955	chr12	25004447	25006452	+	1526	-	GO:0005506;GO:0016705;GO:0020037;GO:0055114	-	cytochrome P450 71A1-like
MELO3C002309.2	164	11.4514	146	10.2816	146	8.90901	22	1.58613	18	1.33774	21	1.29386	21	1.57089	70	4.85276	74	5.36874	chr12	24990588	24991449	+	862	-	GO:0005506;GO:0016705;GO:0020037;GO:0055114	K07408	cytochrome P450 71A1-like
MELO3C002310.2	5963	171.893	6398	186.006	6746	169.942	146	4.34556	87	2.6693	118	3.00143	2936	90.6691	3628	103.833	3313	99.2291	chr12	24982183	24984588	+	2088	-	GO:0005506;GO:0016705;GO:0020037;GO:0055114	K07408	cytochrome P450 71A1-like
MELO3C002311.2	26172	876.135	25519	861.565	26201	766.5	786	27.1679	721	25.6894	750	22.1538	9038	324.128	13267	440.942	14542	505.805	chr12	24971608	24976717	+	1798	-	GO:0004497;GO:0005506;GO:0016491;GO:0016705;GO:0020037;GO:0046872;GO:0055114	K07408	Cytochrome P450
MELO3C002312.2	3258	168.47	3274	170.742	4098	185.184	307	16.3911	263	14.4747	267	12.1824	2603	144.197	3090	158.637	2728	146.568	chr12	24964292	24965514	+	1164	-	GO:0005506;GO:0016705;GO:0020037;GO:0055114	-	cytochrome P450 71A1-like
MELO3C002313.2	4266	139.322	4876	160.603	5789	165.22	13373	450.948	11127	386.777	13558	390.703	4403	154.048	4015	130.184	4054	137.565	chr12	24959474	24963255	+	1843	-	GO:0004672;GO:0005524;GO:0006468;GO:0016301;GO:0016310	K08287	Serine/threonine-protein kinase AFC2
MELO3C002314.2	3406	111.964	4104	136.061	3422	98.305	851	28.8845	1068	37.3672	1241	35.9964	2710	95.4366	2776	90.6002	2717	92.8003	chr12	24955845	24957794	-	1831	-	GO:0005506;GO:0016705;GO:0020037;GO:0055114	-	cytochrome P450 71A1-like
MELO3C002315.2	89	2.94984	67	2.23961	10	0.289646	4336	148.387	2344	82.6894	3103	90.749	119	4.22537	211	6.94328	157	5.4067	chr12	24945631	24947548	-	1816	-	GO:0004497;GO:0005506;GO:0016491;GO:0016705;GO:0020037;GO:0046872;GO:0055114	-	Cytochrome P450
MELO3C002316.2	0	0	0	0	0	0	0	0	0	0	0	0	0	0	0	0	2	0.0918335	chr12	24938991	24940460	-	1362	-	GO:0005618;GO:0016787;GO:0030599;GO:0042545;GO:0045330;GO:0045490	K01051	Pectinesterase
MELO3C002317.2	0	0	0	0	0	0	0	0	0	0	0	0	0	0	0	0	0	0	chr12	24908864	24909840	+	869	-	GO:0005618;GO:0016787;GO:0030599;GO:0042545;GO:0045330;GO:0045490	K01051	Pectinesterase
MELO3C002318.2	41	1.57485	32	1.23964	21	0.704911	1083	42.9519	2317	94.7251	2483	84.1558	159	6.54278	168	6.40676	86	3.43224	chr12	24894997	24897214	+	1567	-	GO:0003712;GO:0004402;GO:0005634;GO:0006355;GO:0008270;GO:0016573	-	BTB/POZ and TAZ domain-containing protein 1-like
MELO3C002319.2	33	0.9299	8	0.227354	13	0.32013	1	0.0290953	9	0.269929	16	0.397828	110	3.32067	16	0.447628	17	0.497732	chr12	24880899	24884058	+	2136	-	GO:0016829;GO:0030570;GO:0045490;GO:0046872	K01728	Pectate lyase
MELO3C002320.2	0	0	0	0	0	0	0	0	0	0	0	0	0	0	0	0	0	0	chr12	24876061	24876210	-	150	-	-	-	Unknown protein
MELO3C002321.2	664	16.7573	620	15.7804	847	18.6801	394	10.2667	559	15.0152	745	16.5899	581	15.708	693	17.3637	622	16.3099	chr12	24863648	24869653	-	2385	-	GO:0006508;GO:0008233	K01376	Ufm1-specific protease
MELO3C002322.2	467	9.09078	472	9.26652	599	10.1899	93	1.86925	99	2.05118	138	2.37037	376	7.8412	405	7.82733	339	6.8566	chr12	24857157	24861320	-	3092	-	GO:0004364;GO:0016740	-	Pentatricopeptide repeat-containing protein, chloroplastic
MELO3C002324.2	3821	78.6007	3669	76.118	4101	73.7224	1261	26.7833	1646	36.0382	2205	40.0231	3217	70.8942	3520	71.8897	3365	71.9216	chr12	24849750	24854482	-	2926	-	GO:0003743;GO:0006413	-	Initiation factor eIF-4 gamma, MA3
MELO3C002325.2	355	8.34991	327	7.75696	383	7.8725	464	11.2686	493	12.342	640	13.2827	440	11.0871	431	10.0648	372	9.09119	chr12	24841024	24849367	-	2559	-	GO:0008152;GO:0008168;GO:0032259	-	Tetratricopeptide TPR-1
MELO3C002326.2	231	11.9861	222	11.6174	253	11.4722	42	2.25017	50	2.76134	59	2.70128	160	8.89398	155	7.98494	127	6.8469	chr12	24834001	24839730	-	1160	-	GO:0004518;GO:0006281;GO:0016829;GO:0090305	-	DNA-(Apurinic or apyrimidinic site) lyase
MELO3C002327.2	596	6.77108	614	7.03511	742	7.36675	222	2.60414	205	2.47885	195	1.95478	514	6.25583	510	5.7525	478	5.6424	chr12	24822711	24830280	-	5298	-	GO:0003676;GO:0008168;GO:0032259	-	lysine-specific demethylase REF6
MELO3C002328.2	2913	87.8863	3218	97.9168	3523	92.8867	1596	49.718	1939	62.2648	2299	61.2029	3186	102.976	3460	103.641	3367	105.548	chr12	24816995	24821647	-	1995	-	GO:0046872	-	zinc finger CCCH domain-containing protein 43
MELO3C002329.2	690	18.5241	1212	32.8157	1693	39.7196	435	12.058	205	5.85769	264	6.25381	4792	137.821	1828	48.7235	1707	47.6153	chr12	24809462	24814411	-	2242	-	GO:0016788	-	GDSL esterase/lipase
MELO3C002331.2	273	7.31931	227	6.13796	301	7.05235	36	0.996574	43	1.22704	35	0.827995	133	3.82005	185	4.9244	151	4.20638	chr12	24798325	24803510	-	2245	-	GO:0003677;GO:0005634;GO:0006351;GO:0006355	-	B3 domain-containing protein
MELO3C002332.2	2197	40.6633	1984	37.0344	2726	44.0919	1622	30.9973	1592	31.3618	2019	32.9733	1285	25.4792	1329	24.4215	1172	22.5385	chr12	24788433	24797733	+	3252	-	GO:0003735;GO:0005840;GO:0006412	K11137	Telomere length regulation TEL2
MELO3C002333.2	118	8.92262	105	8.00738	145	9.58162	20	1.56149	20	1.60963	31	2.06835	62	5.02241	75	5.63049	70	5.49963	chr12	24786581	24788272	-	796	-	GO:0003735;GO:0005840;GO:0006412	-	30S ribosomal protein S21
MELO3C002334.2	73	3.87466	92	4.9248	76	3.52521	12	0.657645	17	0.960381	19	0.88985	57	3.24112	55	2.89833	37	2.0405	chr12	24782568	24785585	+	1134	-	GO:0006508;GO:0008233;GO:0008234	-	Sentrin/sumo-specific protease
MELO3C002335.2	3104	125.389	3297	134.322	3516	124.121	1195	49.8431	1392	59.8495	1629	58.0645	1741	75.3436	1948	78.1269	1808	75.8858	chr12	24777901	24781394	-	1490	-	GO:0000502	K03037	26S proteasome non-ATPase regulatory subunit 6 homolog
MELO3C002336.2	658	13.5913	647	13.4781	827	14.9279	345	7.35788	359	7.89247	475	8.65725	519	11.4845	554	11.361	537	11.5248	chr12	24769381	24776916	-	2914	-	GO:0004672;GO:0005524;GO:0006468;GO:0009507;GO:0016301;GO:0016310	K08869	Protein kinase superfamily protein
MELO3C002337.2	2	0.134203	4	0.270696	0	0	15	1.03926	25	1.78548	16	0.947335	15	1.07828	7	0.466341	7	0.488038	chr12	24766491	24768186	-	897	-	-	-	At3g48490
MELO3C002338.2	304	18.2248	348	21.0407	343	17.9698	429	26.555	351	22.3966	454	24.0159	526	33.782	450	26.7841	475	29.5875	chr12	24763791	24766402	+	1004	-	GO:0000166;GO:0004550;GO:0005524;GO:0006165;GO:0006183;GO:0006228;GO:0006241;GO:0016301;GO:0016310;GO:0016740	K00940	Nucleoside diphosphate kinase
MELO3C002339.2	1	0.0465506	0	0	0	0	0	0	0	0	0	0	1	0.0498695	0	0	4	0.193468	chr12	24759257	24760745	-	1293	-	GO:0016747	-	vinorine synthase-like
MELO3C002340.2	0	0	0	0	3	0.147064	1	0.0579193	2	0.119409	0	0	1	0.0600944	0	0	2	0.116568	chr12	24755697	24757332	-	1073	-	GO:0016747	-	vinorine synthase-like
MELO3C002341.2	0	0	0	0	0	0	0	0	0	0	2	0.178521	0	0	0	0	0	0	chr12	24747491	24748085	+	595	-	-	-	At5g50335
MELO3C002342.2	29045	1133.73	29295	1153.25	38720	1320.79	23270	937.854	24697	1026.05	29335	1010.36	26137	1092.96	32393	1255.35	28606	1160.17	chr12	24731965	24734951	-	1542	-	GO:0006006;GO:0016491;GO:0016620;GO:0050661;GO:0051287;GO:0055114	K00134	Glyceraldehyde-3-phosphate dehydrogenase
MELO3C002343.2	371	14.6814	221	8.82018	327	11.3084	3932	160.66	3185	134.149	3688	128.777	869	36.8404	699	27.4629	743	30.5498	chr12	24727761	24731470	-	1521	-	GO:0006006;GO:0016491;GO:0016620;GO:0050661;GO:0051287;GO:0055114	K00134	Glyceraldehyde-3-phosphate dehydrogenase
MELO3C002344.2	87	2.54695	197	5.81644	121	3.09561	322	9.73321	244	7.60282	256	6.61292	324	10.1615	155	4.50512	171	5.20141	chr12	24721839	24726095	-	2056	-	GO:0016021	-	Amino acid transporter, transmembrane
MELO3C002345.2	2850	143.549	3633	184.549	3724	163.918	1461	75.9811	1730	92.744	2029	90.1759	2567	138.513	1714	85.7119	1438	75.2557	chr12	24715951	24717145	+	1195	-	GO:0005515	-	Emb|CAB62340.1
MELO3C002346.2	2235	83.1938	2514	94.3777	2641	85.9097	229	8.80134	179	7.09171	249	8.17835	1463	58.3402	1322	48.8562	1771	68.4947	chr12	24701481	24705189	+	1617	-	GO:0003824;GO:0008152;GO:0016874	-	4-coumarate-CoA ligase
MELO3C002347.2	393	10.821	411	11.4132	404	9.72109	132	3.75273	172	5.04065	207	5.02917	454	13.3918	569	15.5547	489	13.9897	chr12	24691694	24695933	-	2186	-	GO:0005737;GO:0005856;GO:0005874;GO:0005886;GO:0006810;GO:0008017;GO:0008352;GO:0015031;GO:0016020;GO:0016021;GO:0030658;GO:0031410;GO:0051013	K14841	Katanin p80 WD40 repeat-containing subunit B1 homolog
MELO3C002348.2	13	0.417539	12	0.38871	12	0.336818	27	0.895401	25	0.85463	7	0.198383	10	0.344084	4	0.127552	3	0.100115	chr12	24687076	24689589	+	1874	-	GO:0016020;GO:0016021;GO:0016740;GO:0016757	-	O-fucosyltransferase family protein, putative
MELO3C002349.2	521	34.4604	585	39.0237	621	35.895	552	37.6982	570	40.1274	721	42.0794	740	52.4354	654	42.9472	636	43.7083	chr12	24684064	24686107	+	910	-	GO:0004017;GO:0005524;GO:0006139;GO:0016301;GO:0016310;GO:0016740;GO:0016776;GO:0019205;GO:0046939	K00939	Adenylate kinase
MELO3C002350.2	646	15.8253	1132	27.9676	840	17.9828	270	6.82939	711	18.5384	616	13.3153	2606	68.3917	1351	32.8585	852	21.6862	chr12	24675202	24678740	-	2457	-	GO:0003824;GO:0004474;GO:0006097;GO:0006099;GO:0016740	K01638	Malate synthase
MELO3C002351.2	15	0.310044	50	1.0423	39	0.704461	47	1.00307	59	1.29798	76	1.38611	130	2.87863	140	2.87299	92	1.97581	chr12	24664428	24669084	-	2912	-	GO:0004672;GO:0005524;GO:0006468;GO:0016020;GO:0016021;GO:0016301;GO:0016310	-	Receptor protein kinase-like protein
MELO3C002352.2	270	9.23368	316	10.8991	397	11.8648	356	12.5707	364	13.2494	438	13.2171	433	15.8639	338	11.4763	450	15.99	chr12	24651272	24664257	+	1760	-	GO:0004055;GO:0005524;GO:0006526	K01940	argininosuccinate synthase, chloroplastic-like
MELO3C002354.2	473	19.9368	440	18.7042	569	20.9589	62	2.69828	87	3.903	63	2.34309	541	24.4288	498	20.8401	490	21.4593	chr12	24644550	24649160	-	1428	-	GO:0016853	K08246	cycloeucalenol cycloisomerase
MELO3C002355.2	5753	277.684	5924	288.378	6870	289.784	6770	337.4	7417	381.039	8626	367.383	6792	351.209	8214	393.628	7677	385.011	chr12	24641287	24643581	+	1247	-	GO:0003746;GO:0005853;GO:0006412;GO:0006414	K03232	Elongation factor 1 beta
MELO3C002356.2	3295	48.1841	3695	54.4946	3857	49.2899	2466	37.2341	2541	39.5491	3043	39.2647	2816	44.1155	3120	45.2978	3113	47.299	chr12	24625899	24639841	+	4116	-	GO:0005524	-	AAA-type ATPase family protein
MELO3C002357.2	243	6.8219	322	9.11686	322	7.89978	172	4.98571	199	5.94615	274	6.78738	271	8.15039	279	7.77638	257	7.49647	chr12	24616243	24621467	-	2144	-	GO:0005515;GO:0005634;GO:0005681;GO:0006397;GO:0008380;GO:0016607	K09131	UPF0235 protein At5g63440
MELO3C002358.2	196	9.54468	262	12.8676	269	11.4477	65	3.26827	59	3.05803	90	3.86723	190	9.91218	182	8.79936	169	8.55099	chr12	24613173	24615638	+	1236	-	-	-	At5g50410
MELO3C002359.2	1795	48.9759	1747	48.073	1971	46.9964	3955	111.42	4414	128.184	5158	124.18	1258	36.7713	1262	34.1863	1271	36.032	chr12	24608821	24611026	+	2206	-	GO:0000145;GO:0006887	K07195	exocyst complex component EXO70B1
MELO3C002360.2	3155	124.688	3529	140.659	4900	169.231	1850	75.491	1385	58.2583	1977	68.9418	1442	61.0519	1293	50.7337	896	36.7923	chr12	24597744	24599445	+	1523	-	GO:0005634;GO:0016567	-	F-box protein At1g67340
MELO3C002361.2	1014	32.4124	923	29.7554	1152	32.18	125	4.12556	175	5.95382	193	5.44356	771	26.4021	724	22.9766	668	22.1858	chr12	24579669	24585913	-	1883	-	GO:0008641	K12164	ubiquitin-like modifier-activating enzyme 5
MELO3C002362.2	15	0.868959	8	0.4674	20	1.01251	3	0.179444	1	0.0616584	5	0.255582	20	1.24122	9	0.517637	11	0.662103	chr12	24576165	24579334	+	1039	-	GO:0003824;GO:0004132;GO:0008270;GO:0016020;GO:0016021;GO:0016787	K01493	Deoxycytidylate deaminase, putative
MELO3C002363.2	945	17.0758	938	17.094	1068	16.8648	1190	22.2022	1500	28.8486	1911	30.4693	713	13.8022	711	12.7554	678	12.7293	chr12	24569057	24575732	-	3331	-	GO:0005634;GO:0009793;GO:0009960;GO:0046872	-	TITAN-like protein
MELO3C002364.2	0	0	0	0	0	0	0	0	0	0	0	0	0	0	0	0	0	0	chr12	24570196	24571140	+	945	-	GO:0008168;GO:0016740;GO:0032259;GO:0045492	-	glucuronoxylan 4-O-methyltransferase 1
MELO3C002365.2	30	1.04255	29	1.0164	50	1.51847	380	13.6351	238	8.80313	247	7.574	38	1.41472	26	0.897064	21	0.758263	chr12	24566239	24568184	-	1732	-	GO:0003824	-	Molybdenum cofactor sulfurase
MELO3C002366.2	1049	79.7212	1050	80.4782	1123	74.5828	870	68.268	810	65.5191	955	64.0404	1545	125.787	1274	96.1263	1532	120.971	chr12	24562016	24564495	+	792	-	GO:0005622;GO:0006605;GO:0006886;GO:0015031;GO:0015450;GO:0016020;GO:0071806	K07342	protein transport protein Sec61 subunit gamma
MELO3C002367.2	204	12.8037	198	12.5332	220	12.0667	35	2.26816	56	3.74091	36	1.9937	192	12.9097	200	12.4626	170	11.0861	chr12	24558595	24560855	+	959	-	GO:0009507;GO:0009536;GO:0009543;GO:0009579;GO:0031977	-	Thylakoid lumenal 17.9 kDa protein, chloroplastic
MELO3C002368.2	0	0	0	0	0	0	0	0	0	0	0	0	0	0	0	0	0	0	chr12	24554838	24555056	+	219	-	-	-	Unknown protein
MELO3C002369.2	67	1.84733	117	3.25347	132	3.18056	73	2.07822	60	1.76078	75	1.82467	120	3.54455	67	1.83408	71	2.03401	chr12	24543718	24548226	-	2183	-	GO:0000165;GO:0000977;GO:0003677;GO:0003700;GO:0005634;GO:0006351;GO:0006355;GO:0045944;GO:0046983	K09264	MADS-box family transcription factor
MELO3C002370.2	0	0	0	0	0	0	0	0	2	0.0971389	1	0.0402653	0	0	0	0	0	0	chr12	24537602	24540376	+	1319	-	GO:0003677;GO:0005634	-	squamosa promoter-binding-like protein 13A
MELO3C002371.2	723	30.5599	798	34.0179	852	31.4712	25	1.09107	55	2.47435	67	2.49885	675	30.5652	753	31.5997	614	26.9654	chr12	24525460	24528695	-	1424	-	GO:0008641;GO:0016874	K10684	SUMO-activating enzyme subunit 1B
MELO3C002372.2	15971	484.035	9072	277.292	14782	391.506	3033	94.911	5876	189.544	8915	238.407	2021	65.6177	5051	151.983	4428	139.437	chr12	24513114	24515582	-	1986	-	GO:0030001;GO:0046872	-	heavy metal-associated isoprenylated plant protein 3-like
MELO3C002373.2	7	0.304209	1	0.0438293	4	0.151913	4	0.179487	53	2.45151	62	2.37749	0	0	0	0	0	0	chr12	24503225	24505536	+	1385	-	GO:0006629;GO:0006631;GO:0006633;GO:0009507;GO:0009536;GO:0016787;GO:0016790	K10781	Acyl-[acyl-carrier-protein] hydrolase
MELO3C002374.2	1	0.0346516	0	0	1	0.030282	0	0	0	0	0	0	0	0	1	0.0344032	0	0	chr12	24494906	24497892	-	1737	-	GO:0016020;GO:0016021	-	11-beta-hydroxysteroid dehydrogenase-like protein
MELO3C002375.2	0	0	0	0	0	0	0	0	0	0	0	0	0	0	0	0	0	0	chr12	24491692	24493729	-	1417	-	GO:0016491;GO:0055114	-	11-beta-hydroxysteroid dehydrogenase 1B-like
MELO3C002376.2	0	0	0	0	0	0	5	0.237023	4	0.195463	0	0	0	0	0	0	0	0	chr12	24488008	24489832	-	1311	-	GO:0016491;GO:0055114	-	11-beta-hydroxysteroid dehydrogenase 1B-like
MELO3C002377.2	0	0	1	0.055035	0	0	29	1.63398	5	0.290404	5	0.240752	0	0	0	0	0	0	chr12	24486133	24487982	-	1103	-	GO:0016491;GO:0055114	-	11-beta-hydroxysteroid dehydrogenase 1B-like
MELO3C002378.2	2	0.210087	3	0.31782	0	0	10	1.0846	4	0.447212	2	0.185375	0	0	1	0.10429	0	0	chr12	24482960	24483532	+	573	-	GO:0009733	K14488	auxin-responsive protein SAUR71-like
MELO3C002379.2	0	0	0	0	0	0	0	0	0	0	0	0	3	0.180115	0	0	0	0	chr12	24471877	24474670	-	1074	-	GO:0016020;GO:0016021	-	Protein tapetum determinant 1
MELO3C002380.2	0	0	0	0	0	0	0	0	0	0	0	0	0	0	0	0	0	0	chr12	24461695	24463640	+	1025	-	GO:0005886;GO:0006810;GO:0008643;GO:0016020;GO:0016021	K15382	Bidirectional sugar transporter SWEET
MELO3C002381.2	74	3.18374	250	10.8477	27	1.01515	7	0.310959	3	0.137376	4	0.151851	30	1.38273	48	2.05032	46	2.05631	chr12	24451493	24453403	+	1399	-	GO:0005886;GO:0006810;GO:0008643;GO:0016020;GO:0016021	K15382	Bidirectional sugar transporter SWEET
MELO3C002382.2	199	5.37121	364	9.90857	321	7.57154	28	0.780327	16	0.459645	35	0.833565	555	16.048	333	8.92355	394	11.0494	chr12	24439278	24443349	+	2230	-	GO:0004672;GO:0004674;GO:0005524;GO:0005886;GO:0006468;GO:0016301;GO:0016310;GO:0046777	K17592	Kinase family protein
MELO3C002383.2	0	0	0	0	0	0	0	0	0	0	0	0	0	0	0	0	0	0	chr12	24424671	24426867	+	1546	-	GO:0046983	-	transcription factor bHLH137
MELO3C002384.2	1420	42.6921	1291	39.145	1672	43.9295	591	18.3462	766	24.5116	1017	26.9794	1185	38.167	1307	39.013	1289	40.2659	chr12	24407009	24415040	-	2002	-	GO:0000911;GO:0005886;GO:0007049;GO:0009825;GO:0016020;GO:0030136;GO:0031410;GO:0040008;GO:0051301	-	Coiled-coil domain-containing protein SCD2
MELO3C002385.2	393	10.3885	598	15.9424	601	13.8834	227	6.19564	324	9.1157	410	9.56306	241	6.82477	150	3.93665	167	4.58671	chr12	24400191	24403533	-	2277	-	GO:0046983	-	Transcription factor Inducer of CBF expression 1
MELO3C002386.2	545	15.1657	662	18.5787	748	18.1898	513	14.7396	487	14.4238	589	14.4622	670	19.9734	769	21.2456	732	21.1642	chr12	24391014	24396399	-	2163	-	-	-	Transducin family protein / WD-40 repeat family protein
MELO3C002387.2	408	13.6506	483	16.2978	571	16.6951	2144	74.0657	1509	53.7361	1682	49.6559	449	16.0934	478	15.878	420	14.6005	chr12	24386581	24390812	+	1799	-	GO:0016829;GO:0017009	-	chromophore lyase CRL, chloroplastic
MELO3C002388.2	6939	195.167	6057	171.814	6563	161.314	19804	575.125	17632	527.832	24402	605.603	11337	341.6	10675	298.093	12998	379.849	chr12	24382168	24385256	+	2140	-	GO:0005509;GO:0005783;GO:0006457;GO:0051082	K08054	calnexin homolog
MELO3C002389.2	0	0	0	0	0	0	0	0	0	0	0	0	0	0	0	0	0	0	chr12	24376328	24380811	+	4402	-	GO:0004672;GO:0005524;GO:0006468;GO:0016301;GO:0016310	-	LRR receptor-like serine/threonine-protein kinase GSO1
MELO3C002390.2	0	0	0	0	3	0.127876	0	0	0	0	2	0.0860778	0	0	0	0	0	0	chr12	24368197	24369430	-	1234	-	-	-	At5g44650
MELO3C002391.2	231	10.4305	160	7.28625	242	9.54925	248	11.5623	235	11.2939	270	10.7575	105	5.07917	152	6.81415	149	6.99044	chr12	24363880	24366283	-	1333	-	GO:0004601;GO:0005576;GO:0006979;GO:0016491;GO:0020037;GO:0042744;GO:0046872;GO:0055114	K00430	Peroxidase
MELO3C002392.2	221	4.31322	200	3.93668	288	4.91204	514	10.3579	442	9.18154	515	8.86888	148	3.09443	229	4.43731	209	4.23819	chr12	24358807	24361890	-	3084	-	GO:0016020;GO:0016021;GO:0016301;GO:0016310	-	LRR receptor-like serine/threonine-protein kinase GSO1
MELO3C002393.2	55	1.51162	65	1.8017	75	1.80136	141	4.00127	126	3.68582	108	2.61912	39	1.1483	45	1.22791	62	1.7705	chr12	24352898	24355087	-	2190	-	GO:0016020;GO:0016021;GO:0016301;GO:0016310	-	LRR receptor-like kinase
MELO3C002394.2	20	0.497026	6	0.15038	19	0.412632	37	0.949404	40	1.05802	22	0.482419	18	0.479217	20	0.493462	14	0.361495	chr12	24343418	24346595	-	2422	-	GO:0016020;GO:0016021;GO:0016301;GO:0016310	-	LRR receptor-like kinase family protein
MELO3C002396.2	334	11.3323	338	11.5658	426	12.6311	311	10.8951	231	8.34192	287	8.5922	544	19.7733	415	13.9795	362	12.7615	chr12	24334455	24343457	-	1774	-	GO:0008168;GO:0016740;GO:0032259	-	Ribulose-1,5 bisphosphate carboxylase/oxygenase large subunit N-methyltransferase, chloroplastic
MELO3C002397.2	187	7.44412	153	6.14262	209	7.27074	24	0.986468	45	1.90664	28	0.983518	175	7.46312	202	7.98358	196	8.10686	chr12	24329104	24333037	-	1512	-	GO:0005840	-	Mitochondrial 37S ribosomal protein S27
MELO3C002398.2	0	0	0	0	0	0	8	0.252632	3	0.0976571	10	0.269868	0	0	0	0	1	0.0317778	chr12	24328891	24330858	+	1968	-	GO:0003333;GO:0005886;GO:0015171;GO:0016020;GO:0016021	K03294	Cationic amino acid transporter
MELO3C002399.2	3	0.107867	2	0.0725252	6	0.18853	0	0	0	0	0	0	4	0.154077	2	0.0713958	2	0.0747176	chr12	24323435	24326074	+	1674	-	GO:0016491;GO:0016788;GO:0052886;GO:0052887;GO:0052889;GO:0055114	-	GDSL esterase/lipase
MELO3C002400.2	401	13.1676	269	8.90849	445	12.7697	93	3.15314	197	6.88512	177	5.12846	587	20.6495	368	11.9973	336	11.4637	chr12	24317983	24320628	-	1833	-	GO:0008152;GO:0016740;GO:0016757;GO:0016758	-	Glycosyltransferase
MELO3C002401.2	0	0	0	0	0	0	0	0	0	0	0	0	0	0	0	0	0	0	chr12	24310313	24312562	-	1606	-	GO:0016020;GO:0016021	-	Aberrant panicle organization 1 protein
MELO3C002402.2	479	8.0601	506	8.58709	603	8.86711	698	12.1272	549	9.83244	666	9.88852	688	12.4023	577	9.63951	608	10.63	chr12	24301603	24306080	-	3577	-	GO:0004672;GO:0004713;GO:0005524;GO:0006468;GO:0016301;GO:0016310;GO:0018108;GO:0030246	-	C-type lectin receptor-like tyrosine-protein kinase At1g52310
MELO3C002403.2	3442	108.696	3163	100.737	4396	121.316	4075	132.87	3120	104.867	4133	115.165	3023	102.27	4629	145.132	3955	129.769	chr12	24298979	24303192	+	1906	-	GO:0008152;GO:0016787;GO:0016813	K02083	Allantoate deiminase
MELO3C002404.2	0	0	0	0	0	0	0	0	0	0	0	0	2	0.160401	4	0.297305	0	0	chr12	24273510	24275634	+	804	-	-	-	PLATZ transcription factor family protein
MELO3C002405.2	448	29.278	468	30.8461	609	34.781	126	8.50226	189	13.1465	262	15.1084	553	38.7168	630	40.877	636	43.1863	chr12	24265441	24266361	-	921	-	GO:0003735;GO:0005622;GO:0005840;GO:0006412	K02935	50S ribosomal protein L7/L12
MELO3C002406.2	1969	53.1214	2225	60.5403	2416	56.9615	590	16.4352	611	17.5448	828	19.7109	2349	67.8918	2521	67.5261	2347	65.7903	chr12	24253536	24264656	+	2231	-	GO:0003824;GO:0003937;GO:0004643;GO:0006164	K00602	bifunctional purine biosynthesis protein PurH
MELO3C002407.2	6753	90.0448	7400	99.5141	8011	93.3489	5028	69.2241	5211	73.955	6484	76.2882	5839	83.4086	6642	87.9297	6471	89.6516	chr12	24234619	24244940	-	4514	-	GO:0004672;GO:0005524;GO:0006468;GO:0016301;GO:0016310	-	PB1 domain-containing protein/Pkinase_Tyr domain-containing protein
MELO3C002408.2	600	12.5483	937	19.7635	504	9.21136	16	0.345504	11	0.244855	32	0.590521	496	11.1128	347	7.20505	385	8.36601	chr12	24228962	24234503	+	2878	-	GO:0006811;GO:0006813;GO:0015079;GO:0016020;GO:0016021;GO:0071805	K03549	Potassium transporter
MELO3C002409.2	3256	75.6673	3756	88.0319	3937	79.9557	1101	26.4187	1776	43.929	2223	45.5844	1958	48.7469	2107	48.6142	1672	40.3724	chr12	24221074	24227668	+	2590	-	GO:0006811;GO:0006813;GO:0015079;GO:0016020;GO:0016021;GO:0071805	K03549	Potassium transporter
MELO3C002411.2	451	19.6708	471	20.7184	499	19.0198	1385	62.3726	1663	77.2007	2127	81.8586	265	12.3823	276	11.9517	262	11.8733	chr12	24194974	24196353	+	1380	-	GO:0016020;GO:0016021	-	Transmembrane protein, putative
MELO3C002412.2	95	2.38053	98	2.47667	137	3.00007	76	1.96636	123	3.2805	137	3.02917	119	3.19454	98	2.4381	71	1.84856	chr12	24188514	24193469	+	2402	-	GO:0007165;GO:0016020;GO:0016021	-	Ankyrin repeat family protein
MELO3C002413.2	0	0	0	0	0	0	0	0	0	0	0	0	0	0	0	0	0	0	chr12	24184515	24185403	+	405	-	GO:0007165;GO:0016020;GO:0016021	-	Ankyrin repeat family protein
MELO3C002414.2	2	0.0464249	1	0.0234106	0	0	0	0	0	0	0	0	0	0	3	0.069138	4	0.096473	chr12	24175284	24179867	+	2593	-	GO:0007165;GO:0016020;GO:0016021	-	Ankyrin repeat family protein
MELO3C002416.2	56	1.51557	72	1.96522	109	2.57796	21	0.586824	39	1.12341	46	1.0985	252	7.30634	207	5.56204	233	6.55193	chr12	24156847	24161419	+	2224	-	GO:0007165;GO:0016020;GO:0016021	-	Ankyrin repeat family protein
MELO3C002417.2	41	1.09679	73	1.96949	46	1.07537	10	0.276211	5	0.142362	20	0.472089	35	1.00304	12	0.318711	28	0.778258	chr12	24152953	24156469	+	2250	-	GO:0007165;GO:0016020;GO:0016021	-	Ankyrin repeat family protein
MELO3C002418.2	0	0	0	0	0	0	0	0	0	0	0	0	0	0	0	0	0	0	chr12	24141488	24144240	+	1894	-	GO:0007165;GO:0016020;GO:0016021	-	Ankyrin repeat family protein
MELO3C002419.2	0	0	0	0	0	0	0	0	0	0	0	0	0	0	0	0	0	0	chr12	24136288	24137131	+	844	-	GO:0005576;GO:0048046	-	Dirigent protein
MELO3C002420.2	0	0	0	0	0	0	0	0	0	0	0	0	0	0	0	0	0	0	chr12	24131172	24132101	-	930	-	-	-	Retrovirus-related Pol polyprotein from transposon TNT 1-94
MELO3C002421.2	166	5.8567	358	12.7385	265	8.17054	1996	72.7118	1301	48.8547	2075	64.5974	92	3.4773	36	1.26102	39	1.42966	chr12	24126641	24129443	+	1706	-	GO:0003846;GO:0004622;GO:0005783;GO:0005794;GO:0005886;GO:0006629;GO:0006979;GO:0009506;GO:0009809;GO:0010043;GO:0016020;GO:0016787;GO:0042542;GO:0046686;GO:0090430	K01054	Caffeoylshikimate esterase
MELO3C002422.2	0	0	0	0	0	0	0	0	0	0	0	0	0	0	0	0	0	0	chr12	24118708	24119634	-	927	-	GO:0016020;GO:0016021	-	Stigma-specific Stig1 family protein, putative
MELO3C002423.2	0	0	0	0	0	0	0	0	0	0	0	0	0	0	0	0	0	0	chr12	24113374	24113847	-	474	-	GO:0016020;GO:0016021	-	Stigma-specific Stig1 family protein, putative
MELO3C002424.2	0	0	0	0	0	0	0	0	0	0	0	0	0	0	0	0	0	0	chr12	24112007	24112459	+	412	-	GO:0016020;GO:0016021	-	Ankyrin repeat-containing protein
MELO3C002425.2	0	0	0	0	0	0	0	0	0	0	0	0	0	0	0	0	0	0	chr12	24108295	24111335	+	1005	-	GO:0016020;GO:0016021	-	Ankyrin repeat-containing protein
MELO3C002426.2	5	0.134955	1	0.0272213	3	0.070762	10	0.278688	7	0.201095	2	0.0476323	9	0.260239	3	0.0803923	1	0.0280442	chr12	24096734	24101512	-	2230	-	GO:0007165;GO:0016020;GO:0016021	-	Ankyrin repeat family protein
MELO3C002428.2	1	0.0408621	0	0	0	0	0	0	0	0	0	0	0	0	0	0	0	0	chr12	24084144	24088092	+	1473	-	GO:0003676;GO:0015074	-	Retrovirus-related Pol polyprotein from transposon TNT 1-94
MELO3C002429.2	0	0	0	0	0	0	0	0	0	0	0	0	0	0	0	0	0	0	chr12	24071924	24075839	-	2105	-	GO:0007165;GO:0016020;GO:0016021	-	Ankyrin repeat family protein
MELO3C002430.2	0	0	0	0	0	0	0	0	0	0	0	0	0	0	0	0	0	0	chr12	24063324	24065586	-	1680	-	GO:0016301;GO:0016310;GO:0030247	-	wall-associated receptor kinase 2
MELO3C002431.2	0	0	0	0	0	0	0	0	0	0	0	0	0	0	0	0	0	0	chr12	24061827	24063801	+	1441	-	GO:0016829;GO:0030570;GO:0045490;GO:0046872	K01728	Pectate lyase
MELO3C002432.2	0	0	0	0	0	0	0	0	0	0	0	0	0	0	0	0	0	0	chr12	24057024	24058407	+	1276	-	GO:0016020;GO:0016021	-	Ankyrin repeat-containing protein
MELO3C002433.2	0	0	0	0	0	0	0	0	0	0	0	0	0	0	0	0	0	0	chr12	24045956	24046595	+	640	-	GO:0016020;GO:0016021	-	Stigma-specific Stig1 family protein, putative
MELO3C002434.2	0	0	0	0	0	0	0	0	0	0	0	0	0	0	0	0	0	0	chr12	24041062	24043691	+	1921	-	GO:0007165;GO:0016020;GO:0016021	-	Ankyrin repeat family protein
MELO3C002435.2	7	0.371871	3	0.160733	2	0.0928505	0	0	1	0.0565429	0	0	1	0.056912	0	0	5	0.275987	chr12	24033425	24035500	+	1133	-	GO:0003676;GO:0015074	-	Retrovirus-related Pol polyprotein from transposon TNT 1-94
MELO3C002436.2	0	0	0	0	0	0	0	0	0	0	1	0.0428306	1	0.0520011	0	0	0	0	chr12	24028746	24030306	+	1240	-	-	-	p55
MELO3C002437.2	2	0.155129	0	0	0	0	5	0.400435	1	0.0825555	6	0.410644	7	0.581661	1	0.0770081	3	0.241773	chr12	24022246	24023021	+	776	-	-	-	p55
MELO3C002438.2	0	0	0	0	0	0	0	0	0	0	0	0	0	0	0	0	0	0	chr12	24014258	24017296	-	1767	-	GO:0007165;GO:0016020;GO:0016021	-	Ankyrin repeat family protein
MELO3C002439.2	0	0	0	0	0	0	0	0	0	0	0	0	0	0	0	0	0	0	chr12	24000721	24004989	-	2271	-	GO:0016020;GO:0016021	-	Ankyrin repeat-containing protein
MELO3C002441.2	0	0	0	0	0	0	0	0	0	0	0	0	3	0.0939048	10	0.290089	22	0.667888	chr12	23988335	23992511	+	2060	-	GO:0016020;GO:0016021	-	Ankyrin repeat-containing protein
MELO3C002442.2	19987	424.344	20800	445.374	26400	489.818	24464	536.288	23662	534.695	28859	540.635	10636	241.913	14557	306.844	12953	285.736	chr12	23978336	23983692	-	2835	-	GO:0004190;GO:0006508;GO:0006629;GO:0008233;GO:0016787	K08245	Aspartic proteinase
MELO3C002443.2	0	0	0	0	0	0	21	0.868906	28	1.19425	20	0.70719	0	0	0	0	0	0	chr12	23977270	23978771	+	1502	-	GO:0016020;GO:0016021	-	F-box plant-like protein, putative
MELO3C002444.2	871	24.3499	842	23.7401	1043	25.4815	576	16.6265	455	13.5386	730	18.0076	1152	34.5018	1060	29.4212	966	28.0596	chr12	23972518	23975916	+	2153	-	GO:0004047;GO:0006546;GO:0008168;GO:0008483;GO:0016740;GO:0032259	K00605	Aminomethyltransferase
MELO3C002445.2	0	0	0	0	0	0	0	0	0	0	0	0	0	0	0	0	0	0	chr12	23970509	23971192	+	657	-	-	-	Unknown protein
MELO3C002446.2	0	0	0	0	0	0	0	0	0	0	0	0	0	0	0	0	0	0	chr12	23962947	23963312	+	366	-	-	-	glycine-rich cell wall structural protein
MELO3C002447.2	3	0.0693432	1	0.0233117	5	0.100998	3	0.0715985	0	0	0	0	1	0.0247624	0	0	2	0.0480327	chr12	23956952	23961539	+	2604	-	GO:0005507;GO:0016491;GO:0055114	-	L-ascorbate oxidase homolog
MELO3C002448.2	80	2.94147	68	2.52159	76	2.44202	16	0.607428	18	0.70442	19	0.616426	67	2.63913	80	2.92038	63	2.4068	chr12	23953407	23956319	+	1637	-	GO:0008270	K19619	tyrosyl-DNA phosphodiesterase 2
MELO3C002449.2	95	2.73068	108	3.13084	164	4.11956	36	1.06844	38	1.16256	45	1.14133	167	5.14249	169	4.8229	205	6.12245	chr12	23947380	23952209	+	2094	-	GO:0004553;GO:0005975	K19891	glucan endo-1,3-beta-glucosidase 1
MELO3C002450.2	517	12.6189	675	16.6159	462	9.85446	1158	29.1836	618	16.0547	948	20.417	1456	38.0717	814	19.7256	1718	43.5691	chr12	23943328	23946501	+	2466	-	GO:0003824;GO:0005623;GO:0008152;GO:0016671;GO:0019419;GO:0045454;GO:0055114	K05907	5'-adenylylsulfate reductase
MELO3C002451.2	1	0.0600698	0	0	0	0	46	2.85308	32	2.04593	38	2.01415	0	0	0	0	0	0	chr12	23938701	23941201	-	1002	-	GO:0004462;GO:0016829;GO:0046872	K01759	Lactoylglutathione lyase
MELO3C002452.2	1748	99.8216	2044	117.721	2151	107.345	6380	376.187	6809	413.857	8525	429.566	1366	83.5688	1797	101.884	1451	86.0944	chr12	23935881	23938201	+	1054	-	GO:0006914	K08341	Autophagy-related protein
MELO3C002453.2	1	0.0421793	0	0	0	0	0	0	0	0	0	0	0	0	0	0	0	0	chr12	23932756	23935182	+	1427	-	GO:0000139;GO:0005794;GO:0006486;GO:0008378;GO:0016020;GO:0016021;GO:0016740;GO:0016757	-	Hexosyltransferase
MELO3C002454.2	0	0	0	0	2	0.108565	2	0.128271	0	0	2	0.109618	8	0.532354	4	0.24668	6	0.387236	chr12	23926277	23927363	+	969	-	GO:0006486;GO:0008378;GO:0016020;GO:0016740	-	Glycosyl transferase, family 31
MELO3C002455.2	4950	73.9489	4267	64.2894	6200	80.9428	1589	24.5104	1359	21.6088	1760	23.2002	4115	65.8577	4307	63.8816	3954	61.3745	chr12	23910505	23921371	+	4029	-	GO:0004373;GO:2001070	-	starch synthase 3, chloroplastic/amyloplastic
MELO3C002456.2	2550	99.086	1670	65.4454	3146	106.83	122	4.89476	91	3.76355	121	4.14868	2353	97.95	2400	92.5887	1948	78.6477	chr12	23907201	23908749	+	1549	-	GO:0015986;GO:0045261;GO:0046933	K02115	ATP synthase gamma-subunit
MELO3C002457.2	198	6.81785	167	5.79948	241	7.25203	109	3.87533	126	4.61782	224	6.80586	220	8.1155	238	8.13643	168	6.01058	chr12	23894949	23897210	-	1748	-	GO:0004601;GO:0005576;GO:0006979;GO:0016491;GO:0020037;GO:0042744;GO:0046872;GO:0055114	K00430	Peroxidase
MELO3C002458.2	7	0.211193	3	0.0912836	17	0.448219	2	0.0623032	8	0.256895	1	0.0266215	18	0.581786	29	0.868667	24	0.752344	chr12	23891570	23894561	+	1995	-	GO:0016020;GO:0016021	-	Transmembrane protein, putative
MELO3C002459.2	8	0.441761	23	1.2809	10	0.482567	40	2.28064	38	2.23339	25	1.21812	10	0.591572	35	1.91884	29	1.66387	chr12	23881756	23882845	+	1090	-	GO:0009507	-	At1g11700
MELO3C002460.2	46	4.34652	47	4.47891	50	4.12871	259	25.2687	209	21.0191	203	16.9252	78	7.89567	51	4.78442	55	5.39972	chr12	23867164	23867800	-	637	-	GO:0006979	-	At3g20340
MELO3C002461.2	301	8.14254	373	10.1764	386	9.12518	91	2.54176	87	2.50494	82	1.95731	478	13.8526	459	12.3277	445	12.5077	chr12	23858066	23863030	-	2225	-	-	-	GPI-anchored protein
MELO3C002462.2	0	0	1	0.095747	0	0	0	0	2	0.202092	1	0.0837697	0	0	0	0	0	0	chr12	23856924	23857557	+	634	-	-	-	At1g11655
MELO3C002463.2	6131	160.167	4314	113.661	6798	155.197	4179	112.723	4217	117.254	5808	133.881	5142	143.908	5400	140.058	4860	131.917	chr12	23850590	23854223	+	2304	-	GO:0016226	-	UPF0051 protein ABCI8, chloroplastic
MELO3C002464.2	3454	171.957	3765	189.04	4052	176.29	3473	178.526	3840	203.476	4746	208.486	3435	183.204	4132	204.236	4077	210.893	chr12	23845643	23849376	+	1209	-	GO:0003676	-	polyadenylate-binding protein RBP45-like
MELO3C002465.2	121	7.62615	99	6.29283	104	5.72814	34	2.21258	19	1.27455	34	1.89083	93	6.27933	104	6.50771	84	5.50078	chr12	23836290	23837348	-	955	-	GO:0005737	K13993	Class I heat shock protein
MELO3C002466.2	5	0.0626847	3	0.0379318	7	0.076692	324	4.19408	241	3.21583	260	2.87619	1	0.0134308	3	0.0373412	2	0.0260523	chr12	23825233	23834785	+	4801	-	GO:0007051	K16743	Abnormal spindle-like microcephaly-associated-like protein, putative
MELO3C002468.2	4868	176.615	3788	138.605	5704	180.849	5385	201.726	5325	205.627	6921	221.564	2705	105.137	3942	141.993	3326	125.379	chr12	23819390	23823767	+	1659	-	GO:0016020;GO:0016021	-	Tobamovirus multiplication protein 1
MELO3C002469.2	321	19.8775	298	18.6108	461	24.947	25	1.59844	23	1.5159	25	1.366	235	15.5896	250	15.3699	269	17.3075	chr12	23813708	23814679	+	972	-	-	-	BnaC01g13120D protein
MELO3C002470.2	575	7.96346	543	7.58445	581	7.03186	219	3.13168	261	3.84732	312	3.81277	233	3.45701	209	2.87379	211	3.03627	chr12	23804393	23812827	+	4346	-	GO:0006629;GO:0008152;GO:0016042;GO:0016787	-	Patatin
MELO3C002471.2	66	2.14964	64	2.10229	70	1.99242	18	0.605332	21	0.72799	15	0.431087	107	3.7335	168	5.43257	138	4.67009	chr12	23798439	23802717	-	1848	-	GO:0001522;GO:0003723;GO:0009451;GO:0009982	-	RNA pseudouridine synthase 6, chloroplastic
MELO3C002473.2	186	6.33578	164	5.63406	224	6.668	16	0.562739	7	0.253787	28	0.841584	220	8.02823	163	5.51251	128	4.53025	chr12	23792280	23797314	-	1767	-	GO:0001522;GO:0003723;GO:0009451;GO:0009982	-	RNA pseudouridine synthase 6, chloroplastic-like
MELO3C002474.2	11	0.3616	13	0.430992	16	0.459638	5	0.169709	1	0.034988	2	0.058012	25	0.880411	4	0.130548	8	0.273244	chr12	23788535	23793024	+	1831	-	GO:0004553;GO:0005975	K05350	beta-glucosidase 47
MELO3C002475.2	0	0	0	0	0	0	1	0.0491673	0	0	0	0	0	0	0	0	0	0	chr12	23779140	23782096	+	1264	-	GO:0000162;GO:0004834;GO:0006568;GO:0008652;GO:0009073;GO:0016829	K01696	Tryptophan synthase
MELO3C002476.2	0	0	0	0	0	0	0	0	0	0	0	0	0	0	0	0	1	0.0457154	chr12	23773659	23776295	+	1368	-	GO:0000162;GO:0004834;GO:0006568;GO:0008652;GO:0009073;GO:0016829	K01696	Tryptophan synthase
MELO3C002477.2	0	0	0	0	0	0	0	0	0	0	0	0	0	0	0	0	0	0	chr12	23759182	23767028	+	2662	-	GO:0003677;GO:0005634;GO:0006355;GO:0008289;GO:0043565	K09338	Homeobox-leucine zipper family protein
MELO3C002478.2	29	6.3938	44	9.78373	48	9.24831	6	1.36588	4	0.938653	7	1.36179	43	10.1564	44	9.63137	42	9.62133	chr12	23750280	23750673	+	273	-	GO:0016020;GO:0016021	-	Crib domain-containing protein ric10
MELO3C002479.2	33	2.78579	42	3.57581	86	6.34443	132	11.5056	86	7.7271	112	8.34266	27	2.44179	21	1.76006	25	2.1928	chr12	23743149	23744630	+	713	-	GO:0005622;GO:0006810	-	nuclear transport factor 2
MELO3C002480.2	3	0.104617	3	0.10551	2	0.0609499	25	0.900166	26	0.965029	20	0.615411	6	0.224153	3	0.103867	2	0.0724665	chr12	23738319	23740418	-	1726	-	GO:0004553;GO:0005576;GO:0005618;GO:0005975;GO:0006073;GO:0008152;GO:0010411;GO:0016740;GO:0016762;GO:0016787;GO:0016798;GO:0042546;GO:0048046;GO:0071555	K08235	Xyloglucan endotransglucosylase/hydrolase
MELO3C002482.2	643	27.7833	752	32.7703	802	30.2836	552	24.627	591	27.1797	647	24.6677	563	26.061	691	29.6432	713	32.0101	chr12	23730651	23735069	+	1393	-	GO:0016020;GO:0016021	K19371	Chaperone protein dnaJ 50
MELO3C002483.2	16	0.578054	15	0.546551	11	0.347297	71	2.64854	49	1.88421	41	1.30703	63	2.43837	159	5.70322	81	3.04059	chr12	23718785	23723882	-	1666	-	GO:0016491;GO:0046872;GO:0051213;GO:0055114	K04125	Gibberellin 2-beta-dioxygenase 8
MELO3C002484.2	821	14.2697	1009	17.6869	1129	17.1485	579	10.3908	563	10.4151	581	8.91045	589	10.9672	803	13.8567	709	12.8039	chr12	23714183	23717952	-	3463	-	GO:0005524;GO:0016301;GO:0016310;GO:0016772	K20115	Pyruvate, phosphate dikinase regulatory protein, putative
MELO3C002485.2	669	27.3182	563	23.186	790	28.1912	174	7.33627	174	7.5624	284	10.2329	420	18.3732	481	19.5005	438	18.5834	chr12	23712629	23715328	+	1474	-	GO:0016020;GO:0016021	-	Transmembrane protein, putative
MELO3C002486.2	0	0	0	0	0	0	2	0.110978	0	0	0	0	0	0	1	0.0533556	0	0	chr12	23702463	23703582	-	1120	-	GO:0016020;GO:0016021	-	Protein NDR1
MELO3C002487.2	0	0	0	0	0	0	1	0.161842	0	0	0	0	1	0.16792	12	1.86745	2	0.325722	chr12	23701020	23701444	-	384	-	GO:0016020;GO:0016021	-	Harpin inducing protein 1-like 9
MELO3C002488.2	10	1.17329	4	0.473322	5	0.512668	0	0	0	0	0	0	10	1.25695	7	0.815415	17	2.07243	chr12	23690406	23692175	-	513	-	GO:0004672;GO:0006468;GO:0016020;GO:0016021;GO:0016301;GO:0016310	-	Cysteine-rich receptor-like protein kinase 25
MELO3C002489.2	629	10.3187	578	9.563	628	9.00318	69	1.16876	67	1.16986	68	0.984322	1619	28.4533	1064	17.3297	1447	24.6643	chr12	23679981	23689122	-	3669	-	GO:0004672;GO:0005524;GO:0006468;GO:0016301;GO:0016310	-	cysteine-rich receptor-like protein kinase 10
MELO3C002491.2	0	0	0	0	0	0	0	0	0	0	0	0	0	0	1	0.0572397	1	0.0599029	chr12	23674762	23675993	-	1044	-	GO:0016301;GO:0016310	-	cysteine-rich receptor-like protein kinase 25
MELO3C002492.2	12	0.599899	9	0.453764	27	1.17956	0	0	2	0.106417	0	0	36	1.92801	33	1.63789	14	0.727193	chr12	23670931	23672221	-	1204	-	GO:0016301;GO:0016310	-	cysteine-rich receptor-like protein kinase 25
MELO3C002493.2	42	1.65552	37	1.47088	83	2.85906	2	0.0813981	7	0.293675	4	0.139122	62	2.6181	64	2.5046	67	2.744	chr12	23667503	23671165	+	1527	-	GO:0003676;GO:0015074	-	Transposon Ty3-G Gag-Pol polyprotein
MELO3C002495.2	6	0.154995	0	0	16	0.3612	0	0	0	0	0	0	42	1.16232	16	0.410357	30	0.805218	chr12	23661930	23664749	-	2330	-	GO:0004672;GO:0005524;GO:0006468;GO:0016301;GO:0016310	-	cysteine-rich receptor-like protein kinase 29
MELO3C002496.2	17	0.248719	1	0.0147554	1	0.0127856	2	0.0302127	1	0.015572	3	0.0387287	35	0.548577	5	0.072628	14	0.21282	chr12	23652511	23660745	-	4114	-	GO:0004672;GO:0005524;GO:0006468;GO:0016301;GO:0016310	-	cysteine-rich receptor-like protein kinase 29
MELO3C002499.2	0	0	0	0	0	0	0	0	0	0	0	0	0	0	0	0	0	0	chr12	23649265	23650047	+	783	-	GO:0004672;GO:0005524;GO:0006468;GO:0016020;GO:0016021;GO:0016301;GO:0016310	-	Cysteine-rich receptor-kinase-like protein
MELO3C002500.2	2	0.0691838	0	0	1	0.0302298	0	0	0	0	0	0	1	0.0370582	5	0.171719	1	0.0359417	chr12	23638594	23641802	-	1740	-	GO:0016020;GO:0016021	-	Sulfite exporter TauE/SafE family protein, putative
MELO3C002501.2	23	0.579961	27	0.686634	16	0.352575	9	0.234322	1	0.0268383	7	0.155748	98	2.64733	43	1.0765	111	2.90816	chr12	23633920	23636908	+	2387	-	GO:0004672;GO:0005524;GO:0006468;GO:0016301;GO:0016310	-	cysteine-rich receptor-like protein kinase 26 isoform X1
MELO3C002504.2	1017	15.2804	1471	22.2903	1295	17.0037	2072	32.1442	1275	20.3895	1508	19.9925	13526	217.717	4808	71.7219	8976	140.126	chr12	23611543	23620880	-	4006	-	GO:0004672;GO:0005524;GO:0006468;GO:0016301;GO:0016310	-	cysteine-rich receptor-like protein kinase 28
MELO3C002506.2	4	0.0567963	3	0.0429608	1	0.0124085	10	0.146609	8	0.120902	4	0.0501156	48	0.730149	58	0.817641	99	1.46056	chr12	23598469	23607646	-	4239	-	GO:0004672;GO:0005524;GO:0006468;GO:0016301;GO:0016310	-	Receptor-like protein kinase
MELO3C002507.2	55	2.46496	59	2.6668	41	1.6058	69	3.19298	65	3.1006	60	2.37275	58	2.78475	82	3.64868	76	3.53904	chr12	23594789	23598259	+	1343	-	GO:0046983	-	transcription factor ILR3-like
MELO3C002508.2	1880	122.332	1375	90.235	2369	134.712	727	48.8445	807	55.8907	928	53.2822	1639	114.254	2211	142.838	1832	123.86	chr12	23591811	23594038	+	925	-	GO:0005623;GO:0006662;GO:0015035;GO:0045454;GO:0055114	K03671	thioredoxin-like protein CXXS1
MELO3C002509.2	8	0.165812	8	0.167227	4	0.0724515	57	1.21984	38	0.838291	45	0.822985	1	0.0222043	5	0.10289	2	0.0430707	chr12	23585676	23591001	+	2904	-	GO:0000166;GO:0003774;GO:0003777;GO:0005524;GO:0005874;GO:0007018;GO:0008017	K10405	Kinesin-like protein
MELO3C002510.2	7245	324.22	4322	195.064	8816	344.773	5506	254.412	6475	308.408	6925	273.447	13042	625.253	12750	566.482	10632	494.357	chr12	23580135	23581674	-	1345	-	GO:0005509;GO:0009523;GO:0009654;GO:0015979;GO:0019898	K08901	oxygen-evolving enhancer protein 3-2, chloroplastic
MELO3C002511.2	127	9.33348	112	8.30134	200	12.8449	89	6.75351	122	9.54297	99	6.41989	218	17.1635	204	14.8848	164	12.523	chr12	23578726	23580096	+	819	-	GO:0016021	-	Transmembrane protein, putative (DUF1218)
MELO3C002512.2	2	0.0823391	0	0	2	0.0719559	0	0	0	0	0	0	0	0	0	0	0	0	chr12	23576301	23578141	-	1462	-	GO:0004650;GO:0005975	K01213	exopolygalacturonase-like
MELO3C002513.2	646	36.6472	684	39.1341	555	27.5145	498	29.1701	654	39.4885	812	40.6459	271	16.4698	588	33.1177	330	19.4512	chr12	23572585	23574678	-	1061	-	GO:0003824	-	Phosphosulfolactate synthase
MELO3C002514.2	14	0.400313	15	0.432567	16	0.399808	438	12.9314	455	13.8474	505	12.7413	52	1.59289	43	1.22072	52	1.5449	chr12	23565706	23568148	+	2105	-	GO:0016567	-	BTB/POZ domain-containing protein At3g22104
MELO3C002515.2	5040	126.822	4741	120.316	6315	138.866	4733	122.97	4790	128.287	6356	141.123	4508	121.522	5854	146.248	5403	141.261	chr12	23560496	23565340	+	2392	-	GO:0003743;GO:0006413	-	Eukaryotic translation initiation factor-like protein
MELO3C002516.2	0	0	3	0.0963039	0	0	0	0	0	0	0	0	2	0.0681981	0	0	0	0	chr12	23534040	23537707	+	1891	-	GO:0000287;GO:0008152;GO:0010333;GO:0016829	K15086	(3S,6E)-nerolidol synthase 1-like
MELO3C002517.2	0	0	0	0	0	0	1	0.0317727	0	0	2	0.0543047	0	0	0	0	0	0	chr12	23508606	23514874	+	1956	-	GO:0000287;GO:0008152;GO:0010333;GO:0016829	K15086	(3S,6E)-nerolidol synthase 1-like
MELO3C002519.2	0	0	0	0	0	0	0	0	0	0	0	0	0	0	0	0	0	0	chr12	23485844	23485996	+	153	-	-	-	Unknown protein
MELO3C002520.2	1	0.028499	3	0.0862267	0	0	11	0.323685	6	0.181997	2	0.0502935	11	0.33584	51	1.44303	51	1.51017	chr12	23479912	23485330	+	2112	-	GO:0000287;GO:0008152;GO:0010333;GO:0016829	K15086	(3S,6E)-nerolidol synthase 1-like
MELO3C002521.2	171	7.46914	157	6.91615	265	10.1153	183	8.25325	332	15.4346	367	14.1447	197	9.2183	321	13.9205	295	13.3882	chr12	23451415	23452792	+	1378	-	GO:0004674;GO:0016301;GO:0016310;GO:0046777	-	At1g11440
MELO3C002522.2	0	0	0	0	1	0.0414498	0	0	0	0	0	0	0	0	2	0.0941817	0	0	chr12	23438271	23441753	-	1269	-	GO:0046983	-	transcription factor bHLH112-like isoform X1
MELO3C002524.2	131	1.46641	94	1.06121	98	0.958672	27	0.312066	13	0.154886	20	0.197545	113	1.3551	114	1.26696	121	1.40732	chr12	23422694	23436087	+	5377	-	GO:0000166;GO:0004672;GO:0004674;GO:0005524;GO:0006468;GO:0016020;GO:0016021;GO:0016301;GO:0016310;GO:0016740;GO:0048544	-	Serine/threonine-protein kinase
MELO3C002525.2	0	0	0	0	0	0	0	0	0	0	0	0	0	0	0	0	0	0	chr12	23421019	23421195	+	177	-	-	-	Unknown protein
MELO3C002526.2	0	0	0	0	0	0	0	0	3	0.120419	0	0	0	0	0	0	0	0	chr12	23409102	23413291	-	1596	-	GO:0006855;GO:0015238;GO:0015297;GO:0016020;GO:0016021;GO:0055085	K03327	Protein DETOXIFICATION
MELO3C002527.2	25	0.49336	20	0.398056	30	0.517375	0	0	1	0.0210043	3	0.0522393	26	0.549677	21	0.411451	20	0.410089	chr12	23403674	23407458	+	3050	-	GO:0000166;GO:0004672;GO:0004674;GO:0005524;GO:0006468;GO:0016020;GO:0016021;GO:0016301;GO:0016310;GO:0016740;GO:0048544	-	Serine/threonine-protein kinase
MELO3C002528.2	0	0	0	0	0	0	0	0	0	0	0	0	0	0	0	0	0	0	chr12	23401644	23401940	-	297	-	GO:0000166;GO:0003774;GO:0003777;GO:0005524;GO:0005874;GO:0007018;GO:0008017	K10406	Kinesin-like protein
MELO3C002529.2	0	0	0	0	0	0	0	0	0	0	0	0	2	0.12631	0	0	0	0	chr12	23397217	23398341	+	1021	-	GO:0000166;GO:0004672;GO:0004674;GO:0005524;GO:0006468;GO:0016020;GO:0016021;GO:0016301;GO:0016310;GO:0016740;GO:0048544	-	Serine/threonine-protein kinase
MELO3C002530.2	0	0	0	0	0	0	0	0	0	0	0	0	1	0.0254164	1	0.0235547	2	0.0493012	chr12	23392995	23396370	-	2537	-	GO:0000166;GO:0004672;GO:0004674;GO:0005524;GO:0006468;GO:0016020;GO:0016021;GO:0016301;GO:0016310;GO:0016740;GO:0048544	-	Serine/threonine-protein kinase
MELO3C002532.2	2	0.0500748	0	0	3	0.0656403	0	0	0	0	0	0	1	0.0268225	1	0.0248579	2	0.0520288	chr12	23385165	23388400	+	2404	-	GO:0000166;GO:0004672;GO:0004674;GO:0005524;GO:0006468;GO:0016020;GO:0016021;GO:0016301;GO:0016310;GO:0016740;GO:0048544	-	Serine/threonine-protein kinase
MELO3C002534.2	9	0.20566	2	0.0460923	4	0.0798782	1	0.0235943	1	0.0243216	1	0.0201632	2	0.0489608	8	0.181498	3	0.0712285	chr12	23378165	23381976	+	2634	-	GO:0000166;GO:0004672;GO:0004674;GO:0005524;GO:0006468;GO:0016020;GO:0016021;GO:0016301;GO:0016310;GO:0016740;GO:0048544	-	Serine/threonine-protein kinase
MELO3C002535.2	9	0.19444	2	0.0435776	8	0.15104	1	0.0223071	3	0.0689839	0	0	12	0.277737	3	0.0643485	5	0.112237	chr12	23371842	23375323	-	2786	-	GO:0000166;GO:0004672;GO:0004674;GO:0005524;GO:0006468;GO:0016020;GO:0016021;GO:0016301;GO:0016310;GO:0016740;GO:0048544	-	Serine/threonine-protein kinase
MELO3C002536.2	40	1.00442	26	0.658445	60	1.31664	0	0	1	0.0267264	0	0	17	0.457314	37	0.922427	43	1.12189	chr12	23366539	23369486	-	2397	-	GO:0000166;GO:0004672;GO:0004674;GO:0005524;GO:0006468;GO:0016020;GO:0016021;GO:0016301;GO:0016310;GO:0016740;GO:0048544	-	Serine/threonine-protein kinase
MELO3C002537.2	0	0	0	0	0	0	0	0	0	0	0	0	0	0	0	0	0	0	chr12	23360130	23363634	+	2674	-	GO:0000166;GO:0004672;GO:0004674;GO:0005524;GO:0006468;GO:0016020;GO:0016021;GO:0016301;GO:0016310;GO:0016740;GO:0048544	-	Serine/threonine-protein kinase
MELO3C002538.2	3	0.0332786	4	0.0447501	0	0	0	0	0	0	0	0	2	0.0237675	0	0	0	0	chr12	23349515	23358322	+	5426	-	GO:0004672;GO:0005524;GO:0006468;GO:0016301;GO:0016310;GO:0048544	-	receptor-like serine/threonine-protein kinase SD1-8
MELO3C002541.2	0	0	0	0	3	0.0314655	1	0.0123923	2	0.0255486	0	0	2	0.0257154	0	0	1	0.0124703	chr12	23341345	23348910	+	5015	-	GO:0004672;GO:0005524;GO:0006468;GO:0016301;GO:0016310;GO:0048544	-	receptor-like serine/threonine-protein kinase SD1-8
MELO3C002542.2	204	4.42477	198	4.33128	192	3.63934	259	5.80043	182	4.20161	217	4.1531	237	5.50705	168	3.6178	235	5.29606	chr12	23337247	23340627	-	2775	-	GO:0000166;GO:0004672;GO:0004674;GO:0005524;GO:0005886;GO:0006468;GO:0016020;GO:0016021;GO:0016301;GO:0016310;GO:0016740;GO:0048544	-	Serine/threonine-protein kinase
MELO3C002543.2	9	0.202963	6	0.136464	3	0.059123	6	0.13971	7	0.168019	0	0	26	0.628143	4	0.0895591	14	0.328041	chr12	23332826	23336509	-	2669	-	GO:0000166;GO:0004672;GO:0004674;GO:0005524;GO:0005886;GO:0006468;GO:0016020;GO:0016021;GO:0016301;GO:0016310;GO:0016740;GO:0048544	-	Serine/threonine-protein kinase
MELO3C002545.2	0	0	0	0	0	0	33	1.53393	66	3.16243	50	1.98616	0	0	0	0	0	0	chr12	23320704	23322243	-	1337	-	GO:0005215;GO:0006810;GO:0016021	-	purine permease 3-like
MELO3C002546.2	15	0.3205	4	0.0861961	10	0.186723	0	0	0	0	1	0.0188534	1	0.0228901	6	0.127281	4	0.0888017	chr12	23315835	23319094	-	2817	-	GO:0000166;GO:0004672;GO:0004674;GO:0005524;GO:0006468;GO:0016020;GO:0016021;GO:0016301;GO:0016310;GO:0016740;GO:0048544	-	Serine/threonine-protein kinase
MELO3C002548.2	0	0	0	0	0	0	0	0	0	0	0	0	0	0	0	0	0	0	chr12	23302482	23302994	-	513	-	GO:0005622;GO:0008270	-	B-box zinc finger protein 32-like
MELO3C002549.2	0	0	0	0	0	0	0	0	0	0	0	0	0	0	0	0	0	0	chr12	23299024	23299638	-	615	-	GO:0003676;GO:0004523;GO:0090502	-	Ribonuclease H domain-containing protein
MELO3C002550.2	6951	136.949	5574	110.757	6463	111.277	2086	42.4352	3121	65.4471	3221	55.9958	3646	76.9554	5499	107.565	4508	92.2828	chr12	23288909	23293053	+	3055	-	GO:0008429;GO:0009909	-	Flowering locus T/terminal flower 1-like protein
MELO3C002551.2	0	0	2	0.0978301	0	0	19	0.951492	46	2.37462	39	1.66905	6	0.311755	5	0.240767	0	0	chr12	23280097	23281530	+	1241	-	GO:0003677	K09422	Transcription factor
MELO3C002552.2	141	14.5073	147	15.2537	272	24.4567	1	0.106235	0	0	0	0	51	5.62145	72	7.35487	30	3.20711	chr12	23273168	23273752	-	585	-	-	-	Wound-responsive family protein
MELO3C002553.2	22	0.665416	28	0.854121	13	0.343617	37	1.15551	50	1.60963	51	1.36111	28	0.907275	14	0.42041	16	0.502823	chr12	23266477	23269974	+	1990	-	GO:0005215;GO:0016020;GO:0016021;GO:0022857;GO:0022891;GO:0055085	-	sugar carrier protein C-like
MELO3C002554.2	329	8.359	349	8.94282	390	8.65931	73	1.91505	134	3.62366	137	3.07137	292	7.94789	256	6.45763	290	7.65564	chr12	23254968	23257336	+	2369	-	GO:0016020;GO:0016021	-	U-box domain-containing protein 4
MELO3C002555.2	261	8.03147	332	10.3035	184	4.94804	4234	134.526	4714	154.393	6678	181.323	1531	50.4708	871	26.6102	1705	54.5135	chr12	23240541	23246114	+	1956	-	GO:0005509;GO:0016491;GO:0055114	K17871	external alternative NAD(P)H-ubiquinone oxidoreductase B2, mitochondrial
MELO3C002556.2	329	8.5911	323	8.5064	296	6.75468	1122	30.2514	1123	31.2116	1412	32.5342	244	6.82579	192	4.9777	259	7.02712	chr12	23233560	23238833	+	2305	-	GO:0019013;GO:0030529	K15047	heterogeneous nuclear ribonucleoprotein U-like protein 1
MELO3C002557.2	368	13.014	409	14.5874	443	13.6908	288	10.5161	286	10.765	330	10.2975	379	14.3586	376	13.2016	313	11.5009	chr12	23228695	23232918	+	1702	-	GO:0005737;GO:0005856;GO:0005874;GO:0008017;GO:0008352;GO:0051013	-	Katanin p80 WD40 repeat-containing subunit B1 homolog
MELO3C002558.2	1469	44.2316	1785	54.205	1660	43.6797	1666	51.7947	1621	51.9491	1860	49.417	1244	40.1274	1250	37.3676	1445	45.2068	chr12	23222445	23228167	+	1999	-	GO:0008152;GO:0008531;GO:0009231;GO:0016301;GO:0016310;GO:0016787	K00861	bifunctional riboflavin kinase/FMN phosphatase
MELO3C002559.2	0	0	0	0	0	0	2	0.121382	2	0.125123	0	0	0	0	0	0	2	0.122146	chr12	23218507	23219765	-	1024	-	GO:0005484;GO:0005622;GO:0006886;GO:0016020;GO:0016192;GO:0061025	K08486	syntaxin-124
MELO3C002560.2	69	2.68983	103	4.04953	66	2.24844	1198	48.2206	1170	48.5452	1507	51.8373	67	2.79809	44	1.70296	45	1.82269	chr12	23214296	23216255	+	1544	-	GO:0016020;GO:0016021	-	Cotton fiber expressed protein
MELO3C002561.2	896	25.841	1024	29.7846	1077	27.1442	358	10.6607	383	11.7567	539	13.7165	747	23.0798	797	22.821	731	21.905	chr12	23196893	23202766	+	2087	-	GO:0016021	-	transmembrane protein 184C
MELO3C002562.2	42	2.23319	50	2.68125	44	2.04451	123	6.75277	171	9.67737	188	8.82039	7	0.398736	11	0.58069	6	0.331477	chr12	23195448	23197501	-	1132	-	GO:0003676;GO:0004519;GO:0006308;GO:0016788;GO:0090305	-	endonuclease 1
MELO3C002563.2	876	22.9046	696	18.3535	961	21.9585	77	2.07878	62	1.72542	66	1.5227	596	16.6946	872	22.6365	698	18.9626	chr12	23184917	23188805	-	2302	-	GO:0006790;GO:0008441;GO:0016311;GO:0046854	K01082	PAP-specific phosphatase HAL2-like
MELO3C002564.2	346	12.5004	515	18.7649	423	13.3552	253	9.43776	248	9.5364	381	12.1458	640	24.7707	646	23.1716	607	22.7857	chr12	23178536	23184190	+	1666	-	-	K19995	Lysine ketoglutarate reductase trans-splicing-like protein
MELO3C002565.2	10	0.283247	12	0.342797	9	0.222776	12	0.35095	12	0.361768	17	0.42488	24	0.72826	20	0.562431	16	0.470879	chr12	23169063	23173150	+	2125	-	GO:0005886;GO:0006810;GO:0015031;GO:0016020;GO:0016021;GO:0030658;GO:0031410	-	Secretory carrier-associated membrane protein
MELO3C002566.2	1200	21.4645	1208	21.792	1464	22.8844	743	13.7223	808	15.3828	1086	17.1404	867	16.6138	1026	18.2205	876	16.2805	chr12	23159572	23167257	+	3365	-	GO:0005737;GO:0005856;GO:0005874;GO:0008017;GO:0008352;GO:0051013	K18643	Katanin p80 WD40 repeat-containing subunit B1 homolog
MELO3C002567.2	15	0.497163	11	0.367698	19	0.550328	0	0	0	0	0	0	4	0.142029	5	0.164533	1	0.0344376	chr12	23148231	23157836	-	1816	-	-	-	Unknown protein
MELO3C002568.2	19	0.943571	28	1.40239	27	1.17178	1	0.0512768	1	0.0528573	0	0	24	1.27686	18	0.887499	15	0.773993	chr12	23144602	23148034	+	1212	-	GO:0016020;GO:0016021	-	CTTNBP 2 amino-terminal-like protein
MELO3C002569.2	5	0.417406	9	0.757742	3	0.218862	0	0	0	0	0	0	11	0.983765	12	0.99459	6	0.520432	chr12	23134089	23134809	-	721	-	-	-	Glucose-fructose oxidoreductase domain-containing protein 2, putative
MELO3C002570.2	1974	85.7869	2018	88.4475	2343	88.9829	767	34.4167	807	37.3277	997	38.2315	1296	60.3378	1339	57.7735	1253	56.5783	chr12	23130537	23133687	+	1385	-	-	-	LisH and RanBPM domains containing protein
MELO3C002571.2	36	1.92608	34	1.8346	53	2.47803	28	1.54678	41	2.33474	30	1.41627	30	1.7195	34	1.80603	31	1.72329	chr12	23128688	23129812	+	1125	-	GO:0003846;GO:0004622;GO:0005783;GO:0005794;GO:0005886;GO:0006629;GO:0006979;GO:0009506;GO:0009809;GO:0010043;GO:0016020;GO:0016787;GO:0042542;GO:0046686;GO:0090430	K01054	Caffeoylshikimate esterase
MELO3C002572.2	3	0.113494	7	0.26708	1	0.0330608	2	0.0781238	21	0.845584	7	0.233671	22	0.891634	9	0.338042	1	0.0393077	chr12	23113686	23118204	-	1591	-	GO:0004180;GO:0004185;GO:0006508;GO:0008233;GO:0016787	K16297	Carboxypeptidase
MELO3C002573.2	0	0	0	0	0	0	0	0	0	0	0	0	2	0.0971836	0	0	1	0.0471278	chr12	23094157	23096807	+	1327	-	GO:0003677;GO:0006355	-	NAC transcription factor 25-like
MELO3C002574.2	0	0	0	0	0	0	0	0	0	0	0	0	0	0	0	0	0	0	chr12	23082540	23083349	+	676	-	GO:0007165	-	TMV resistance protein N
MELO3C002575.2	3	0.0511239	9	0.154681	1	0.0148924	2	0.0351911	0	0	2	0.0300736	0	0	0	0	2	0.0354126	chr12	23071415	23076534	-	3532	-	GO:0009658;GO:0009707	K05747	Hydroxyproline-rich glycoprotein family protein
MELO3C002576.2	0	0	0	0	0	0	0	0	2	0.0582657	0	0	1	0.029323	26	0.706556	0	0	chr12	23036955	23066992	+	2199	-	GO:0004097;GO:0008152;GO:0016491;GO:0055114	K00422	polyphenol oxidase I, chloroplastic-like
MELO3C002578.2	0	0	0	0	0	0	4	0.781729	0	0	0	0	2	0.405543	3	0.563757	5	0.983312	chr12	23030770	23031087	+	318	-	GO:0004097;GO:0008152;GO:0016491;GO:0046148;GO:0055114	-	polyphenol oxidase, chloroplastic-like
MELO3C002579.2	6	0.188979	18	0.571776	1	0.0275247	0	0	20	0.670467	32	0.889335	3	0.101227	0	0	3	0.0981768	chr12	23001028	23004018	+	1911	-	GO:0004097;GO:0008152;GO:0016491;GO:0046148;GO:0055114	K00422	polyphenol oxidase, chloroplastic-like
MELO3C002580.2	0	0	0	0	0	0	0	0	0	0	0	0	0	0	0	0	0	0	chr12	22982663	22984377	-	1656	-	GO:0004097;GO:0008152;GO:0016491;GO:0055114	K00422	polyphenol oxidase, chloroplastic-like
MELO3C002581.2	563	28.0521	544	27.3367	626	27.2578	147	7.56265	169	8.96247	271	11.9146	237	12.6507	342	16.9183	267	13.8227	chr12	22973112	22975516	-	1208	-	GO:0016020;GO:0016021	-	Fiber protein Fb34
MELO3C002582.2	0	0	0	0	0	0	6	0.300229	0	0	1	0.0427617	3	0.155752	0	0	0	0	chr12	22969383	22970624	+	1242	-	GO:0016740;GO:0016757	K01988	lactosylceramide 4-alpha-galactosyltransferase
MELO3C002583.2	0	0	0	0	0	0	0	0	0	0	0	0	0	0	0	0	0	0	chr12	22963634	22965072	+	489	-	GO:0016020;GO:0016021	-	Lysine histidine transporter 1
MELO3C002584.2	0	0	0	0	0	0	0	0	0	0	0	0	0	0	0	0	0	0	chr12	22961785	22962869	+	666	-	GO:0016020;GO:0016021	-	Lysine histidine transporter
MELO3C002585.2	0	0	1	0.177496	3	0.461402	0	0	0	0	0	0	0	0	1	0.174732	1	0.182861	chr12	22959165	22959558	-	342	-	GO:0003824;GO:0016787	-	Epoxide hydrolase 2
MELO3C002586.2	2702	51.6296	2591	49.9311	3102	51.7983	3024	59.6616	3003	61.0735	3567	60.1407	2354	48.187	2308	43.7848	2290	45.4646	chr12	22949872	22958475	+	3150	-	GO:0000070;GO:0007064;GO:0009793;GO:0010789;GO:0045132;GO:0060623;GO:0071922	-	WAPL (Wings apart-like protein regulation of heterochromatin) protein
MELO3C002587.2	594	20.9571	585	20.8157	672	20.7193	199	7.24932	162	6.08336	182	5.66589	519	19.6165	536	18.7752	463	16.9727	chr12	22937143	22947107	+	1706	-	GO:0000166;GO:0004672;GO:0004674;GO:0005524;GO:0006468;GO:0016301;GO:0016310	-	Receptor-like kinase
MELO3C002588.2	1899	25.9185	2339	32.1963	2540	30.2956	3191	44.9688	2904	42.1858	3568	42.9697	2096	30.6469	2356	31.9253	2293	32.5172	chr12	22919035	22929844	-	4410	-	GO:0005634;GO:0006351;GO:0006355;GO:0006970;GO:0010104;GO:0016592;GO:0032922;GO:0048364;GO:0048586;GO:1901672;GO:1902066;GO:2000022;GO:2001009	-	Mediator of RNA polymerase II transcription subunit 16
MELO3C002589.2	994	31.9087	1037	33.5731	1275	35.7679	322	10.6728	450	15.3751	536	15.1824	806	27.7184	946	30.1501	878	29.2848	chr12	22909517	22915488	-	1875	-	-	K20310	At2g47960/T9J23.10
MELO3C002590.2	367	8.83234	149	3.61649	254	5.342	78	1.93823	57	1.46005	76	1.6139	34	0.876595	87	2.07876	105	2.62557	chr12	22899570	22902233	-	2501	-	-	-	CBS domain-containing protein CBSX5
MELO3C002591.2	5	0.178077	9	0.323273	6	0.186745	44	1.61804	19	0.720236	20	0.62852	1	0.0381546	2	0.0707199	1	0.0370051	chr12	22893565	22896363	-	1690	-	GO:0006629;GO:0016021;GO:0030148;GO:0042284;GO:0055114	K04712	sphingolipid delta(4)-desaturase DES1-like
MELO3C002592.2	0	0	0	0	0	0	0	0	0	0	0	0	0	0	0	0	0	0	chr12	22892667	22892909	+	243	-	-	-	Unknown protein
MELO3C002593.2	148	4.72078	223	7.17377	234	6.52271	187	6.15876	180	6.11095	261	7.3459	219	7.48352	232	7.34707	185	6.13124	chr12	22878822	22891409	-	1887	-	GO:0000256;GO:0004038;GO:0008270;GO:0016787;GO:0016810;GO:0050897	K01466	allantoinase
MELO3C002594.2	546	11.0689	437	8.93481	518	9.17706	644	13.4803	718	15.4925	919	16.4392	283	6.14625	290	5.83695	260	5.47661	chr12	22873432	22877679	-	2969	-	GO:0004519;GO:0005524;GO:0006298;GO:0016887;GO:0030983;GO:0045910;GO:0090305	K07456	DNA mismatch repair protein muts2, putative
MELO3C002595.2	415	12.1967	393	11.6487	455	11.686	199	6.03874	233	7.28843	275	7.13147	575	18.1039	658	19.1997	609	18.5967	chr12	22870769	22873263	+	2048	-	GO:0003723;GO:0004519;GO:0009451;GO:0043231;GO:0090305	-	Pentatricopeptide repeat-containing family protein
MELO3C002596.2	283	8.60725	291	8.92609	314	8.3458	380	11.9333	345	11.1681	467	12.5328	382	12.4466	369	11.1424	350	11.0604	chr12	22866637	22869612	-	1979	-	GO:0005506;GO:0009058;GO:0016491;GO:0055114	-	pentatricopeptide repeat-containing protein At2g20710, mitochondrial-like
MELO3C002597.2	78	3.10709	74	2.97291	76	2.64565	8	0.32904	10	0.423978	17	0.597531	139	5.93177	174	6.8815	113	4.67695	chr12	22861781	22864335	-	1511	-	GO:0005506;GO:0009058;GO:0016491;GO:0055114	-	pentatricopeptide repeat-containing protein At2g20710, mitochondrial-like
MELO3C002598.2	18410	1035.6	13889	787.955	18589	913.811	79	4.58846	39	2.33501	46	2.28323	1690	101.844	2699	150.736	2538	148.339	chr12	22858528	22861276	+	1070	-	GO:0008270;GO:0016874;GO:0046872	K10666	E3 ubiquitin-protein ligase RMA1H1-like
MELO3C002599.2	9	0.549958	11	0.677908	5	0.267004	0	0	3	0.195116	0	0	1	0.0654633	3	0.182005	0	0	chr12	22849246	22851705	-	985	-	GO:0016874	-	DNA ligase 1 isoform X1
MELO3C002600.2	245	16.95	244	17.0249	269	16.2636	183	13.0724	193	14.2117	234	14.2848	303	22.4573	355	24.3841	347	24.9436	chr12	22845882	22848861	+	870	-	GO:0005634;GO:0009617	-	Protein LOL2
MELO3C002601.2	100	4.72819	86	4.10095	124	5.12362	104	5.07725	120	6.03894	143	5.96601	225	11.3969	129	6.05563	119	5.84611	chr12	22841465	22845110	-	1273	-	GO:0004619;GO:0016853	K15637	Phosphoglycerate mutase, putative
MELO3C002602.2	0	0	0	0	0	0	0	0	0	0	0	0	0	0	0	0	0	0	chr12	22844901	22845068	+	168	-	-	-	Unknown protein
MELO3C002603.2	1227	13.0298	1046	11.2025	1452	13.4747	505	5.53713	473	5.34613	537	5.03177	877	9.97709	904	9.53096	855	9.43375	chr12	22828764	22834746	-	5668	-	GO:0000148;GO:0003843;GO:0006075;GO:0016020	K11000	callose synthase 11
MELO3C002604.2	157	3.46147	254	5.64788	172	3.31398	50	1.13823	51	1.19678	75	1.45907	137	3.23588	199	4.35601	191	4.37541	chr12	22825540	22828269	+	2730	-	GO:0005768;GO:0005794;GO:0005802;GO:0009507;GO:0016020;GO:0016021	-	DUF2921 family protein
MELO3C002605.2	206	4.65957	146	3.3306	180	3.55805	73	1.70491	52	1.25189	49	0.977974	150	3.6348	187	4.19947	238	5.59346	chr12	22817514	22823078	+	2661	-	GO:0016020;GO:0016021	-	Inner membrane protein oxaA
MELO3C002606.2	548	15.32	348	9.81182	322	7.86676	346	9.98747	256	7.61735	220	5.42694	769	23.0312	572	15.8763	458	13.3036	chr12	22801862	22804014	-	2153	-	GO:0004672;GO:0005524;GO:0006468;GO:0016020;GO:0016021;GO:0016301;GO:0016310;GO:0030246	-	Lectin receptor kinase
MELO3C002607.2	1	0.0448509	9	0.407103	3	0.117585	4	0.185238	11	0.525107	15	0.593629	13	0.624633	28	1.24682	8	0.372808	chr12	22791345	22792808	-	1342	-	GO:0005524	-	Sulfate/thiosulfate import ATP-binding protein cysA, putative
MELO3C002608.2	417	28.5218	1432	98.7813	643	38.4337	941	66.4554	873	63.5535	1093	65.965	326	23.8874	253	17.1805	360	25.584	chr12	22771063	22772067	+	880	-	GO:0003677;GO:0046983	-	transcription factor bHLH118-like
MELO3C002609.2	75	1.89356	95	2.41898	76	1.67684	43	1.12095	20	0.537442	43	0.95794	155	4.19237	79	1.98025	138	3.6201	chr12	22762100	22765089	+	2384	-	GO:0004672;GO:0005524;GO:0006468;GO:0016301;GO:0016310	-	serine/threonine-protein kinase HT1-like
MELO3C002610.2	0	0	0	0	0	0	0	0	0	0	0	0	0	0	0	0	1	0.0613725	chr12	22757747	22758917	-	1019	-	-	-	Pollen Ole e 1 allergen and extensin family protein
MELO3C002611.2	106	4.36397	86	3.5708	93	3.34595	11	0.467594	9	0.394369	11	0.399596	258	11.3791	249	10.1777	306	13.0895	chr12	22747963	22749424	-	1462	-	GO:0016020;GO:0016021	-	VQ motif-containing protein
MELO3C002612.2	1779	30.8938	1975	34.5902	2213	33.5843	638	11.4397	711	13.1416	979	15.0013	1564	29.0966	1580	27.2412	1458	26.3074	chr12	22736663	22742202	-	3466	-	GO:0016787	-	Protein SMG7
MELO3C002614.2	122	5.30193	129	5.65398	118	4.48143	76	3.41026	102	4.718	94	3.60458	126	5.86617	176	7.59383	153	6.9086	chr12	22731910	22735920	-	1385	-	GO:0016020;GO:0016021	-	Nuclear control of ATPase protein 2
MELO3C002615.2	0	0	0	0	0	0	4	0.172752	2	0.0890383	0	0	2	0.0896196	0	0	0	0	chr12	22728872	22730394	-	1439	-	GO:0005739;GO:0009536	-	Late embryogenesis abundant protein (LEA) family protein
MELO3C002616.2	0	0	0	0	0	0	0	0	4	0.429954	0	0	14	1.51466	24	2.40637	15	1.57396	chr12	22725247	22725842	-	596	-	GO:0003677;GO:0005634;GO:0006355	-	dof zinc finger protein DOF2.2-like
MELO3C002617.2	103	3.42706	91	3.05363	143	4.15797	11	0.377901	29	1.02699	19	0.557816	90	3.20803	155	5.12025	126	4.35592	chr12	22716502	22718452	+	1809	-	GO:0003677;GO:0005634;GO:0006355	-	dof zinc finger protein DOF1.4-like
MELO3C002618.2	1	0.0564104	2	0.113784	3	0.147891	1	0.058245	2	0.120081	0	0	0	0	1	0.0560059	0	0	chr12	22696478	22700344	-	1067	-	GO:0003677;GO:0003700;GO:0005634;GO:0006351;GO:0006355;GO:0009908;GO:0046872	-	Squamosa promoter-binding-like protein
MELO3C002619.2	374	9.82585	302	8.00196	378	8.67862	23	0.623916	20	0.559259	34	0.788188	323	9.09099	307	8.00777	339	9.25386	chr12	22693645	22700148	+	2291	-	GO:0006810;GO:0016020;GO:0016021	K15109	Mitochondrial carrier protein, expressed
MELO3C002620.2	0	0	0	0	0	0	0	0	0	0	0	0	0	0	0	0	0	0	chr12	22687835	22688861	+	702	-	GO:0016020;GO:0016021	-	Auxin repressed protein
MELO3C002621.2	0	0	0	0	0	0	0	0	0	0	0	0	0	0	0	0	0	0	chr12	22686395	22686793	-	399	-	-	-	Unknown protein
MELO3C002622.2	218	5.41089	222	5.55719	249	5.40097	95	2.43464	94	2.48327	120	2.62812	325	8.64183	294	7.24492	259	6.67938	chr12	22676571	22683035	-	2425	-	GO:0016020;GO:0016021;GO:0016301;GO:0016310	-	Receptor-like protein kinase family
MELO3C002623.2	7	0.85636	1	0.123381	4	0.42764	0	0	0	0	2	0.215894	12	1.57272	3	0.36438	8	1.01689	chr12	22672503	22672994	-	492	-	GO:0003677;GO:0003700;GO:0005634;GO:0006351;GO:0006355	-	ethylene-responsive transcription factor 12
MELO3C002624.2	734	37.0322	118	6.00421	97	4.27676	122	6.3554	103	5.53101	76	3.38337	2907	157.123	1649	82.5997	801	41.9895	chr12	22659740	22660932	+	1193	-	GO:0003677;GO:0003700;GO:0005634;GO:0006351;GO:0006355	-	ethylene-responsive transcription factor 8
MELO3C002625.2	260	11.2992	248	10.8697	271	10.2921	52	2.33333	59	2.72904	51	1.95567	289	13.4549	210	9.06082	274	12.3723	chr12	22639405	22640912	-	1385	-	GO:0016020;GO:0016021	-	MACPF domain-containing protein
MELO3C002626.2	432	7.46541	413	7.19798	553	8.35133	268	4.78195	276	5.07649	343	5.23018	440	8.14579	360	6.17657	384	6.89487	chr12	22611651	22623053	+	3483	-	GO:0004645;GO:0005975;GO:0008152;GO:0008184;GO:0016597;GO:0016740;GO:0016757;GO:0030170	K00688	Alpha-1,4 glucan phosphorylase
MELO3C002627.2	21	0.35386	14	0.23792	10	0.147256	80	1.39188	76	1.36304	74	1.10026	33	0.595712	37	0.618997	17	0.297636	chr12	22581102	22584786	-	3572	-	GO:0004672;GO:0005524;GO:0006468;GO:0016301;GO:0016310	-	receptor-like protein kinase HSL1
MELO3C002628.2	1235	52.8695	839	36.2235	1492	55.8171	437	19.3161	284	12.9402	274	10.35	401	18.3905	991	42.1198	920	40.9214	chr12	22557765	22562581	-	1406	-	GO:0003677;GO:0006355	-	NAC domain-containing protein 73-like
MELO3C002630.2	404	12.4002	458	14.1776	522	14.0016	67	2.12335	116	3.78956	94	2.54581	291	9.56862	381	11.6104	345	11.0025	chr12	22534938	22541044	-	1961	-	GO:0005634;GO:0006974;GO:0030915;GO:0031348;GO:0045892	-	SNI1
MELO3C002631.2	157	6.58524	163	6.89525	211	7.73418	121	5.24031	160	7.14292	201	7.4391	196	8.8072	216	8.99498	235	10.2415	chr12	22533068	22535162	+	1435	-	GO:0002161;GO:0005737;GO:0006450;GO:0051499	K07560	D-tyrosyl-tRNA(Tyr) deacylase
MELO3C002633.2	602	18.8426	661	20.8659	656	17.9436	288	9.30758	325	10.8271	315	8.69976	416	13.9492	528	16.4079	453	14.7322	chr12	22507188	22520263	-	1923	-	GO:0000166;GO:0003676;GO:0004386;GO:0005524;GO:0008026;GO:0016787	K13117	ATP-dependent RNA helicase, putative
MELO3C002635.2	0	0	0	0	0	0	0	0	0	0	0	0	0	0	2	0.0650962	0	0	chr12	22500505	22505376	+	1836	-	-	-	Unknown protein
MELO3C002636.2	0	0	0	0	0	0	0	0	0	0	0	0	2	0.258961	0	0	0	0	chr12	22480671	22481266	+	498	-	GO:0003677;GO:0005634;GO:0006351;GO:0006355	-	transcription factor TCP10-like
MELO3C002637.2	0	0	11	0.505863	1	0.0398483	2	0.0941628	1	0.0485326	5	0.201174	3	0.146548	1	0.0452714	1	0.0473777	chr12	22473967	22476350	-	1320	-	GO:0016787	K17879	Nudix hydrolase 15, mitochondrial
MELO3C002638.2	0	0	0	0	0	0	0	0	0	0	0	0	0	0	0	0	0	0	chr12	22465728	22466036	-	309	-	GO:0005576;GO:0005615;GO:0007275;GO:0030154;GO:0033612;GO:0045168;GO:0048046	-	CLAVATA3/ESR (CLE)-related protein 1
MELO3C002639.2	136	3.36312	167	4.16495	158	3.41445	4	0.102132	6	0.157921	7	0.15274	155	4.10625	162	3.97734	171	4.39363	chr12	22443809	22447317	-	2434	-	GO:0005739;GO:0010182;GO:0080156	-	Pentatricopeptide repeat-containing protein
MELO3C002640.2	0	0	0	0	0	0	0	0	0	0	0	0	0	0	0	0	0	0	chr12	22446863	22447090	+	228	-	-	-	Unknown protein
MELO3C002641.2	34	0.928098	32	0.880959	50	1.19274	36	1.01465	33	0.958767	34	0.818929	112	3.27524	123	3.33346	84	2.38242	chr12	22436789	22441767	+	2205	-	GO:0005768;GO:0005794;GO:0005802;GO:0009827;GO:0016020;GO:0016021;GO:0016413;GO:0030244;GO:0045489	-	Protein trichome birefringence
MELO3C002642.2	243	7.75511	216	6.95226	300	8.36688	57	1.87826	61	2.07203	47	1.32353	220	7.52168	241	7.63613	239	7.9251	chr12	22423368	22430702	+	1886	-	GO:0006508;GO:0008233;GO:0008234;GO:0016787	-	Maternal effect embryo arrest 18
MELO3C002643.2	5	0.209575	0	0	0	0	0	0	2	0.0892243	0	0	3	0.13471	3	0.124843	3	0.130652	chr12	22420017	22423086	+	1436	-	GO:0004842;GO:0016567;GO:0016740	-	RING-type E3 ubiquitin transferase
MELO3C002644.2	1	0.0373386	0	0	0	0	0	0	0	0	0	0	3	0.120002	2	0.0741418	4	0.155183	chr12	22414671	22416826	+	1612	-	GO:0046983	-	Transcription factor
MELO3C002645.2	132	9.95622	127	9.66084	157	10.3486	42	3.27092	22	1.76615	46	3.06148	118	9.53483	120	8.98621	99	7.75855	chr12	22405667	22408201	-	798	-	GO:0004721;GO:0006470;GO:0016787	K14819	Dual specificity protein phosphatase 12
MELO3C002646.2	374	12.2409	386	12.7415	499	14.2726	200	6.75883	198	6.89749	281	8.11523	268	9.39695	254	8.25373	292	9.93	chr12	22401550	22403388	-	1839	-	GO:0003743;GO:0006355;GO:0006413;GO:0070897	K15196	Transcription initiation factor IIB
MELO3C002647.2	8	0.532065	12	0.804909	9	0.523092	5	0.343356	2	0.141576	13	0.762906	8	0.570001	2	0.132063	12	0.829241	chr12	22395788	22399559	-	905	-	GO:0030001;GO:0046872	-	heavy metal-associated isoprenylated plant protein 21 isoform X2
MELO3C002648.2	1200	31.8184	1146	30.6459	1305	30.2391	1867	51.1142	1786	50.4038	1889	44.1959	972	27.6105	1159	30.511	1013	27.9082	chr12	22385874	22394050	-	2270	-	GO:0016787	-	Alpha/beta-hydrolase superfamily protein
MELO3C002649.2	4	0.331625	6	0.501682	2	0.144903	43	3.68091	8	0.705929	15	1.09731	35	3.1086	23	1.89317	81	6.97745	chr12	22379803	22380528	+	726	-	GO:0003677;GO:0005634;GO:0006355	-	Dof zinc finger protein
MELO3C002651.2	1708	23.1541	1709	23.3654	2398	28.4086	2310	32.3335	2899	41.8286	3030	36.244	1736	25.2116	2304	31.0097	2128	29.9735	chr12	22364676	22372119	+	4440	-	GO:0003779;GO:0005856;GO:0030036	-	protein SCAR3
MELO3C002654.2	885	26.9985	893	27.4751	1103	29.4058	2128	67.0298	1799	58.4133	2220	59.7588	857	28.0084	931	28.1982	900	28.5275	chr12	22307778	22311637	+	1973	-	GO:0003677;GO:0003700;GO:0005634;GO:0006351;GO:0006355;GO:0009793;GO:0010431;GO:0043565	-	Trihelix transcription factor ASIL2
MELO3C002655.2	0	0	0	0	0	0	6	0.583544	0	0	3	0.249343	0	0	0	0	0	0	chr12	22303293	22304448	+	639	-	-	-	6,7-dimethyl-8-ribityllumazine synthase
MELO3C002656.2	0	0	0	0	0	0	19	2.18667	6	0.711812	6	0.590111	0	0	0	0	0	0	chr12	22291828	22292449	-	540	-	GO:0004864;GO:0009738;GO:0010427;GO:0042803;GO:0043086	K14496	Abscisic acid receptor
MELO3C002658.2	1482	33.1851	1172	26.4675	1343	26.2803	397	9.17877	444	10.5818	366	7.23149	1693	40.6127	1806	40.1501	1808	42.0647	chr12	22283886	22287172	-	2688	-	GO:0003743;GO:0006413	-	Transcription initiation factor TFIID subunit 11, putative
MELO3C002659.2	1465	24.6721	1536	26.0886	1461	21.502	1283	22.3098	787	14.1068	1017	15.1127	2075	37.4367	1736	29.0264	1832	32.0567	chr12	22276862	22282039	-	3574	-	GO:0004672;GO:0005524;GO:0006468;GO:0016020;GO:0016021;GO:0016301;GO:0016310	-	Receptor protein kinase, putative
MELO3C002660.2	0	0	0	0	0	0	2	0.141889	3	0.219394	2	0.121256	0	0	0	0	6	0.428347	chr12	22274187	22275062	+	876	-	GO:0006351;GO:0043565	-	transcription factor HBP-1b(C38)-like
MELO3C002661.2	16	0.50054	14	0.44171	18	0.492098	18	0.581421	21	0.699233	11	0.303643	18	0.603256	6	0.186356	20	0.65009	chr12	22263581	22265982	-	1924	-	GO:0000166;GO:0004672;GO:0004674;GO:0005524;GO:0006468;GO:0007165;GO:0016301;GO:0016310;GO:0016740	K07198	Non-specific serine/threonine protein kinase
MELO3C002662.2	659	14.4975	313	6.94452	242	4.65247	134	3.04377	88	2.06051	82	1.59175	1735	40.89	1142	24.943	2077	47.4754	chr12	22254416	22257343	-	2736	-	GO:0004672;GO:0005516;GO:0005524;GO:0006468;GO:0006970;GO:0009625;GO:0009733;GO:0009793;GO:0016020;GO:0016021;GO:0016301;GO:0016310;GO:0046777	-	Receptor kinase, putative
MELO3C002663.2	1058	33.8728	1014	32.7412	1241	34.7215	1005	33.2224	1263	43.0381	1507	42.5727	944	32.3779	1094	34.7742	1156	38.4546	chr12	22242326	22246681	-	1880	-	GO:0006355	-	SAP30-binding protein
MELO3C002664.2	626	16.9039	375	10.2126	349	8.23568	321	8.9499	325	9.34074	381	9.07802	277	8.01316	485	13.0026	288	8.08036	chr12	22233115	22236813	-	2229	-	GO:0005215;GO:0006810;GO:0016020;GO:0016021;GO:0055085	K14611	Nucleobase-ascorbate transporter-like protein
MELO3C002665.2	124	2.63636	84	1.80117	72	1.33775	39	0.856147	18	0.407324	26	0.487764	85	1.93603	145	3.06074	132	2.91597	chr12	22227807	22233141	+	2831	-	GO:0016020;GO:0016021;GO:0016740;GO:0016757	-	O-fucosyltransferase family protein
MELO3C002666.2	0	0	0	0	0	0	0	0	0	0	0	0	0	0	0	0	0	0	chr12	22219699	22226478	+	3114	-	GO:0000166;GO:0004672;GO:0004674;GO:0005524;GO:0006468;GO:0016020;GO:0016021;GO:0016301;GO:0016310;GO:0016740	-	LRR receptor-like kinase
MELO3C002667.2	0	0	0	0	0	0	0	0	0	0	0	0	0	0	0	0	0	0	chr12	22209961	22215123	+	3279	-	GO:0000166;GO:0004672;GO:0004674;GO:0005524;GO:0006468;GO:0016020;GO:0016021;GO:0016301;GO:0016310;GO:0016740	K13420	LRR receptor-like kinase
MELO3C002668.2	295	7.69325	312	8.20603	296	6.7459	121	3.25816	142	3.94149	160	3.6818	345	9.63867	435	11.2629	420	11.3805	chr12	22204527	22207614	-	2308	-	GO:0003729;GO:0003735;GO:0005622;GO:0005773;GO:0005840;GO:0006412;GO:0016020;GO:0022625;GO:0022626;GO:0030529	K02868	60S ribosomal protein L11
MELO3C002669.2	2	0.117215	1	0.0591077	2	0.102434	17	1.02873	9	0.56141	16	0.827419	1	0.0627861	6	0.349123	2	0.121789	chr12	22203917	22205527	+	1027	-	GO:0006353	-	SAP-like protein BP-73
MELO3C002670.2	50	1.39717	41	1.15545	41	1.0012	71	2.0485	69	2.05216	87	2.14511	79	2.36491	56	1.5536	51	1.48072	chr12	22201200	22203659	-	2154	-	GO:0008270	-	Pentatricopeptide repeat-containing protein
MELO3C002671.2	9	0.314581	11	0.38777	10	0.305457	99	3.57294	102	3.79468	160	4.93473	3	0.112337	10	0.347028	19	0.690031	chr12	22199381	22201102	+	1722	-	GO:0016020;GO:0016021;GO:0016301;GO:0016310	-	LRR receptor-like kinase
MELO3C002672.2	373	4.69683	298	3.78445	425	4.67676	87	1.13114	81	1.08559	129	1.4333	232	3.12964	314	3.92554	317	4.14744	chr12	22182844	22198450	+	4780	-	GO:0005886;GO:0016020;GO:0016021;GO:0016740;GO:0016757;GO:0016760;GO:0030244;GO:0046872;GO:0071555	K10999	Cellulose synthase
MELO3C002673.2	3	0.244013	0	0	0	0	5	0.419915	7	0.606002	2	0.14354	3	0.261411	2	0.161509	1	0.0845117	chr12	22180907	22181646	+	740	-	-	-	Unknown protein
MELO3C002674.2	102	5.90324	55	3.21029	87	4.40017	87	5.19887	87	5.35912	83	4.23858	258	15.9963	283	16.2612	226	13.5901	chr12	22174748	22175787	+	1040	-	-	-	BnaA04g24650D protein
MELO3C002675.2	1	0.0530307	5	0.267417	1	0.0463434	0	0	0	0	0	0	3	0.170435	0	0	0	0	chr12	22146043	22147343	-	1135	-	GO:0003700;GO:0006355;GO:0043565	-	WRKY protein
MELO3C002676.2	53	2.84827	50	2.70998	50	2.3482	71	3.93971	102	5.83432	108	5.12132	31	1.78475	60	3.20134	40	2.23352	chr12	22136300	22139425	+	1120	-	GO:0003924;GO:0005525	K07904	Ras-related protein, expressed
MELO3C002677.2	1809	51.1671	1098	31.3217	1770	43.7508	1185	34.6075	1294	38.9557	1652	41.2301	1721	52.1487	2333	65.5151	2043	60.0406	chr12	22127312	22134073	+	2128	-	GO:0005773;GO:0009507;GO:0009570	-	NAD(P)-binding Rossmann-fold superfamily protein
MELO3C002678.2	1693	34.6133	1060	21.8566	1031	18.4206	1202	25.3741	779	16.9515	911	16.4345	3257	71.3368	1608	32.6397	1827	38.8105	chr12	22078758	22081701	-	2944	-	GO:0004842;GO:0016567;GO:0016740	-	RING-type E3 ubiquitin transferase
MELO3C002679.2	510	11.403	715	16.123	643	12.5638	157	3.6245	169	4.02179	252	4.97166	466	11.1621	439	9.74513	328	7.61986	chr12	22072102	22075898	+	2692	-	GO:0003700;GO:0005634;GO:0006355;GO:0043565	K09419	heat stress transcription factor A-4c
MELO3C002680.2	0	0	0	0	0	0	0	0	0	0	0	0	0	0	0	0	0	0	chr12	22069749	22070230	-	441	-	GO:0004672;GO:0005524;GO:0006468;GO:0016301;GO:0016310	-	mitogen-activated protein kinase kinase kinase A-like
MELO3C002681.2	14	0.607979	13	0.56937	7	0.265655	47	2.10745	31	1.43287	46	1.76267	11	0.511757	21	0.905429	12	0.54146	chr12	22058946	22061841	-	1386	-	GO:0003700;GO:0006351;GO:0006355;GO:0009742	-	BES1/BZR1 homolog protein 4
MELO3C002682.2	871	22.046	874	22.3107	955	21.124	278	7.26535	318	8.56689	357	7.9732	548	14.8594	583	14.6506	529	13.9121	chr12	22055161	22058960	+	2378	-	GO:0046872	K20523	RING/FYVE/PHD-type zinc finger protein
MELO3C002683.2	0	0	0	0	2	0.143129	0	0	2	0.174321	0	0	0	0	0	0	0	0	chr12	22054036	22054817	+	735	-	-	-	Unknown protein
MELO3C002684.2	33	2.96458	46	4.16771	35	2.74775	7	0.649302	10	0.956165	20	1.58537	49	4.7158	46	4.10281	49	4.57372	chr12	22053142	22053811	-	670	-	GO:0016020;GO:0016021	-	BnaC03g59480D protein
MELO3C002685.2	129	1.90633	104	1.55001	153	1.97588	51	0.778178	42	0.660606	41	0.53462	113	1.78895	102	1.49652	128	1.96537	chr12	22049261	22053333	+	4073	-	GO:0003824;GO:0004553;GO:0005975	K01179	endoglucanase 9-like
MELO3C002686.2	1893	31.9695	3148	53.6181	2571	37.9445	671	11.7006	721	12.96	713	10.625	3642	65.8925	2913	48.8428	3381	59.3275	chr12	22028609	22041087	-	3564	-	GO:0004672;GO:0004674;GO:0005524;GO:0005886;GO:0006468;GO:0016020;GO:0016021;GO:0016301;GO:0016310	-	Receptor-like protein kinase
MELO3C002687.2	38	0.899063	20	0.477229	49	1.01312	22	0.537439	23	0.579187	38	0.793309	12	0.304157	23	0.540268	34	0.835815	chr12	22024873	22027501	+	2544	-	GO:0003924;GO:0005525	-	dynamin-related protein 4C-like
MELO3C002688.2	0	0	0	0	0	0	3	0.57016	0	0	9	1.46174	0	0	3	0.548241	2	0.382499	chr12	22017410	22017736	-	327	-	-	-	Unknown protein
MELO3C002689.2	94	3.43525	66	2.43257	68	2.1717	6330	238.855	4174	162.355	4526	145.948	107	4.18913	160	5.8053	138	5.24003	chr12	22012886	22017367	-	1647	-	GO:0004672;GO:0005524;GO:0006468;GO:0016301;GO:0016310	-	serine/threonine-protein kinase STY8-like
MELO3C002690.2	544	13.2136	482	11.8076	664	14.0945	527	13.217	339	8.76408	387	8.29442	405	10.5387	576	13.8905	505	12.745	chr12	22008243	22012376	-	2478	-	GO:0004672;GO:0005524;GO:0006468;GO:0008270;GO:0016301;GO:0016310	K03070	Myosin heavy chain kinase B
MELO3C002691.2	4694	271.404	2440	142.283	3680	185.944	773	46.1479	867	53.3551	839	42.8043	1191	73.7726	3389	194.545	3442	206.78	chr12	21993161	21997694	-	1041	-	GO:0000165;GO:0000977;GO:0003677;GO:0003700;GO:0005634;GO:0006351;GO:0006355;GO:0045944;GO:0046983	K09264	MADS box transcription factor AGAMOUS
MELO3C002692.2	0	0	1	0.047648	4	0.165148	6	0.292688	1	0.050285	6	0.250125	0	0	4	0.187624	5	0.245442	chr12	21988018	21990993	+	1274	-	GO:0016491;GO:0016788;GO:0052886;GO:0052887;GO:0052889;GO:0055114	-	GDSL esterase/lipase
MELO3C002693.2	68	3.14115	68	3.16795	69	2.78541	166	7.91748	201	9.88233	257	10.4753	93	4.60227	115	5.27414	86	4.12765	chr12	21980045	21981494	+	1303	-	GO:0016740;GO:0016757	-	Adenine phosphoribosyltransferase
MELO3C002694.2	20	0.344928	27	0.469626	34	0.512433	35	0.623255	16	0.293699	46	0.700017	11	0.203236	25	0.428068	20	0.358388	chr12	21966541	21974699	-	3490	-	GO:0003824;GO:0003825;GO:0004805;GO:0005992;GO:0016311;GO:0016740;GO:0016757;GO:0016787	K16055	Trehalose-6-phosphate synthase, putative
MELO3C002695.2	45	2.42919	33	1.79661	28	1.32089	57	3.17705	63	3.61971	107	5.09665	26	1.5036	34	1.82223	16	0.897415	chr12	21963562	21964676	-	1115	-	GO:0008152;GO:0016787	-	Gibberellin receptor GID1a
MELO3C002696.2	29	2.37161	13	1.07221	14	1.00054	71	5.9952	64	5.5707	73	5.2677	4	0.350442	0	0	2	0.169942	chr12	21955132	21955867	-	736	-	-	-	Senescence_reg domain-containing protein
MELO3C002697.2	1	0.0290212	0	0	0	0	8	0.23972	17	0.525107	20	0.51215	1	0.0310903	2	0.0576261	0	0	chr12	21947629	21952475	+	2074	-	GO:0003677;GO:0003824;GO:0004518;GO:0004527;GO:0006281;GO:0016788;GO:0035312;GO:0090305	K10746	exonuclease 1
MELO3C002698.2	1419	69.4951	1548	76.4598	1733	74.1704	2436	123.182	2593	135.163	3068	132.58	1307	68.5737	1607	78.138	1425	72.5122	chr12	21942218	21945543	+	1229	-	GO:0003723;GO:0003743;GO:0005737;GO:0006412;GO:0006413	K03259	Eukaryotic translation initiation factor 4E
MELO3C002699.2	348	13.01	298	11.2358	310	10.1279	348	13.4331	382	15.2001	521	17.1865	286	11.4544	229	8.49978	247	9.59443	chr12	21916515	21932770	+	1610	-	GO:0005737	-	Sh3 domain-containing protein 2
MELO3C002700.2	651	22.3141	670	23.1614	841	25.1916	298	10.5467	294	10.7258	396	11.977	883	32.4243	950	32.3294	778	27.7079	chr12	21871094	21874210	-	1756	-	GO:0016301;GO:0016310	-	Serine/threonine-protein kinase PLK4
MELO3C002701.2	3	0.501582	0	0	0	0	3	0.517896	2	0.355906	2	0.295055	2	0.35823	2	0.331991	2	0.347437	chr12	21870632	21870991	-	360	-	-	-	Unknown protein
MELO3C002702.2	4	0.284923	0	0	4	0.248993	15	1.10321	10	0.758143	8	0.502816	4	0.305237	4	0.282879	2	0.14802	chr12	21866110	21868054	+	845	-	GO:0016020;GO:0016021	-	AWPM-19-like membrane family protein
MELO3C002703.2	2953	164.88	3329	187.46	3383	165.07	7070	407.59	7425	441.251	9869	486.217	4362	260.916	4370	242.248	4700	272.664	chr12	21862345	21864684	+	1078	-	GO:0003735;GO:0005622;GO:0005840;GO:0006412	K02912	60S ribosomal protein L32-1
MELO3C002704.2	1052	29.8116	1097	31.3521	1354	33.5311	360	10.5335	399	12.0344	503	12.5774	1298	39.4053	1108	31.1733	1064	31.3282	chr12	21854000	21859074	+	2124	-	GO:0005840;GO:0006364;GO:0008152;GO:0043022;GO:0070569	-	Ribosome maturation factor rimM
MELO3C002705.2	606	8.5083	747	10.5775	836	10.2574	603	8.74153	540	8.06953	631	7.81721	647	9.73161	731	10.1897	575	8.38808	chr12	21844050	21851414	+	4287	-	GO:0000155;GO:0000160;GO:0005622;GO:0006351;GO:0006355;GO:0007165;GO:0009584;GO:0009585;GO:0009881;GO:0017006;GO:0018298;GO:0023014;GO:0042803;GO:0050896	K12123	Phytochrome
MELO3C002706.2	422	6.50285	488	7.58406	529	7.12373	59	0.938735	85	1.3941	102	1.3869	432	7.13157	454	6.94579	375	6.00409	chr12	21816472	21835750	+	3906	-	GO:0006396	K13217	Pre-mRNA-processing factor 39
MELO3C002708.2	353	9.4726	417	11.2855	537	12.593	365	10.1132	379	10.8247	501	11.8627	305	8.76808	275	7.32659	240	6.6916	chr12	21812569	21815673	-	2243	-	GO:0016021	-	cold-regulated 413 inner membrane protein 2, chloroplastic-like
MELO3C002709.2	38	1.4385	32	1.22171	38	1.2571	130	5.08124	165	6.64806	219	7.31515	10	0.405543	12	0.451006	13	0.511322	chr12	21810130	21813182	+	1590	-	GO:0004673;GO:0016740;GO:0018106	-	Glucan endo-1,3-beta-glucosidase 1
MELO3C002710.2	1026	30.4511	931	27.8674	1299	33.6919	251	7.69182	181	5.71766	258	6.7566	892	28.3616	854	25.1645	846	26.0886	chr12	21799957	21806935	+	2028	-	GO:0006508;GO:0008236	-	carboxyl-terminal-processing peptidase 1, chloroplastic
MELO3C002711.2	759	20.6435	900	24.6874	1011	24.03	80	2.24663	156	4.51597	172	4.12784	614	17.8904	683	18.4433	575	16.2493	chr12	21781096	21797537	-	2213	-	GO:0016020;GO:0016021;GO:0030001;GO:0046873;GO:0055085	-	Mg2+ transporter protein, CorA-like/Zinc transport protein ZntB
MELO3C002712.2	595	23.8435	552	22.3092	656	22.973	144	5.95821	205	8.74363	272	9.61779	463	19.8767	406	16.153	524	21.8177	chr12	21775000	21779091	+	1502	-	GO:0006810	K20472	coatomer subunit zeta-1-like
MELO3C002713.2	415	13.9703	384	13.037	423	12.4439	49	1.70315	46	1.64816	66	1.96044	450	16.2285	521	17.4128	549	19.2023	chr12	21769805	21773149	+	1788	-	GO:0005768;GO:0005794;GO:0005802;GO:0005886;GO:0008168;GO:0016020;GO:0016021;GO:0016740;GO:0032259	-	S-adenosyl-L-methionine-dependent methyltransferase
MELO3C002714.2	652	40.7093	634	39.9233	754	41.1413	721	46.4817	891	59.2118	1011	55.6994	397	26.5551	598	37.07	487	31.5937	chr12	21763114	21766676	+	964	-	GO:0005840	-	60S ribosomal protein L18a-like protein
MELO3C002715.2	1602	100.442	1794	113.44	1601	87.7211	2221	143.781	2394	159.757	2975	164.586	2765	185.72	2994	186.371	2952	192.306	chr12	21759565	21761879	+	960	-	GO:0003735;GO:0005840;GO:0006412	K02955	Ribosomal protein S11
MELO3C002716.2	1454	41.6942	1253	36.2371	1401	35.1083	435	12.8795	397	12.1167	519	13.132	1282	39.3831	1666	47.4308	1304	38.852	chr12	21740251	21746115	-	2099	-	GO:0008963;GO:0016020;GO:0016021;GO:0016740;GO:0051992	K01000	Phospho-n-acetylmuramoyl-pentapeptide-transferase, putative
MELO3C002717.2	930	65.1648	976	68.9717	980	60.0091	422	30.5311	478	35.6486	558	34.4998	704	52.8462	756	52.5929	740	53.8749	chr12	21726684	21739002	-	859	-	GO:0006457;GO:0016272;GO:0051082	K04798	prefoldin subunit 6
MELO3C002718.2	0	0	0	0	2	0.0426773	0	0	0	0	2	0.0430913	1	0.0261588	2	0.0484854	0	0	chr12	21699116	21705464	-	2465	-	GO:0005216;GO:0005244;GO:0005249;GO:0006810;GO:0006811;GO:0006813;GO:0016020;GO:0016021;GO:0034220;GO:0034765;GO:0055085;GO:0071805	-	Inward rectifying potassium channel
MELO3C002719.2	371	25.9656	448	31.6223	372	22.7525	445	32.1577	433	32.255	598	36.93	820	61.4822	844	58.6465	918	66.7563	chr12	21680608	21683942	-	860	-	GO:0003735;GO:0005840;GO:0006412	K02882	60S ribosomal protein L18a
MELO3C002720.2	0	0	0	0	0	0	0	0	0	0	0	0	1	0.0426746	2	0.0790977	0	0	chr12	21669853	21676231	-	1511	-	GO:0016020;GO:0016021;GO:0055114	-	Cytochrome b561 domain-containing protein
MELO3C002721.2	690	26.3021	662	25.4501	897	29.8809	465	18.3018	468	18.9877	588	19.7775	640	26.1356	695	26.3027	594	23.5262	chr12	21663568	21667246	-	1579	-	GO:0003924;GO:0006807;GO:0016151	K03189	urease accessory protein G
MELO3C002722.2	1388	42.8209	1421	44.2131	1675	45.1587	1426	45.424	1519	49.8779	1779	48.4278	2814	93.0038	1988	60.8916	1998	64.0452	chr12	21649474	21654168	+	1951	-	GO:0003824;GO:0006633;GO:0008152;GO:0016740;GO:0016747	K09458	3-oxoacyl-[acyl-carrier-protein] synthase
MELO3C002723.2	0	0	0	0	0	0	0	0	0	0	0	0	0	0	0	0	0	0	chr12	21631224	21631745	+	522	-	GO:0000165;GO:0000977;GO:0003677;GO:0005622;GO:0005634;GO:0006351;GO:0006355;GO:0045944;GO:0046983	-	agamous-like MADS-box protein AGL29 isoform X1
MELO3C002724.2	75	2.95435	64	2.54256	88	3.02931	6	0.244035	16	0.670818	11	0.382336	84	3.54478	73	2.85494	93	3.80634	chr12	21613799	21621010	-	1528	-	GO:0016020;GO:0016021	-	Tobamovirus multiplication protein 1
MELO3C002725.2	354	7.59887	383	8.29154	515	9.6608	474	10.5057	475	10.8523	376	7.12174	258	5.93302	279	5.94599	283	6.31185	chr12	21597573	21610169	-	2804	-	-	-	Tetratricopeptide repeat (TPR)-like superfamily protein
MELO3C002726.2	626	17.8573	712	20.4839	941	23.458	1747	51.4557	1890	57.3835	1455	36.6232	2238	68.393	2095	59.3335	1538	45.585	chr12	21593109	21595508	+	2110	-	GO:0003824	-	Aldolase-type TIM barrel
MELO3C002727.2	16097	988.65	16127	998.945	20287	1088.87	2579	163.549	3981	260.24	3638	197.157	49556	3260.65	48600	2963.52	38696	2469.38	chr12	21591382	21592875	+	980	-	GO:0009507;GO:0009522;GO:0009523;GO:0009535;GO:0009536;GO:0009579;GO:0009765;GO:0015979;GO:0016020;GO:0016021;GO:0016168;GO:0018298	K08912	Chlorophyll a-b binding protein, chloroplastic
MELO3C002729.2	990	34.4639	1927	67.6552	1553	47.2455	97	3.48658	322	11.9308	338	10.3824	443	16.5212	246	8.50234	293	10.5979	chr12	21578879	21582319	+	1729	-	GO:0005215;GO:0006810;GO:0016020;GO:0016021	-	Purine permease
MELO3C002730.2	32	1.51421	40	1.90892	49	2.02625	10	0.488581	4	0.201456	12	0.501038	11	0.557621	26	1.22147	31	1.52413	chr12	21566414	21568778	+	1272	-	GO:0005215;GO:0006810;GO:0016020;GO:0016021	-	Purine permease
MELO3C002731.2	130	5.27626	128	5.23942	179	6.34886	326	13.6615	277	11.9659	321	11.4958	92	4.00019	73	2.94157	74	3.12061	chr12	21561953	21564596	+	1483	-	GO:0005215;GO:0006810;GO:0016020;GO:0016021	-	Purine permease
MELO3C002732.2	681	17.4423	622	16.0671	695	15.5561	1280	33.8505	1709	46.5889	2251	50.8726	353	9.68592	468	11.9008	476	12.6674	chr12	21552351	21558829	+	2350	-	GO:0000139;GO:0005794;GO:0009834;GO:0016020;GO:0016021;GO:0016491;GO:0016740;GO:0045491;GO:0045492;GO:0055114	-	Protein REDUCED WALL ACETYLATION 1
MELO3C002733.2	399	8.64187	370	8.08216	490	9.27452	122	2.72832	168	3.87283	260	4.96891	460	10.6734	474	10.1927	514	11.5671	chr12	21530873	21533747	-	2779	-	GO:0000373;GO:0000374;GO:0005739;GO:0006397;GO:0006521;GO:0007005;GO:0009845;GO:0010228;GO:0010896;GO:0032885;GO:0040007;GO:0090351;GO:0090615;GO:2001006	-	Intron maturase, type II family protein
MELO3C002734.2	0	0	0	0	0	0	0	0	0	0	0	0	0	0	0	0	0	0	chr12	21511462	21515939	-	1042	-	GO:0016301;GO:0016310	-	PIK-related kinase, FAT
MELO3C002735.2	14	0.519518	24	0.898203	2	0.0648579	380	14.5598	262	10.348	264	8.64429	3	0.119263	2	0.0736847	18	0.694017	chr12	21480362	21482332	-	1622	-	GO:0016491;GO:0046872;GO:0055114	K04125	Gibberellin 2-oxidase
MELO3C002736.2	810	34.2132	746	31.7789	782	28.8653	300	13.0837	392	17.623	409	15.2435	515	23.3038	584	24.4904	466	20.4512	chr12	21474619	21477259	+	1425	-	GO:0005886	K04507	Calcyclin-binding protein
MELO3C002737.2	0	0	0	0	0	0	0	0	0	0	0	0	0	0	0	0	0	0	chr12	21459982	21461800	+	1392	-	GO:0004553;GO:0005975	-	glucan endo-1,3-beta-glucosidase 14-like
MELO3C002738.2	2838	58.8422	2710	56.6678	3374	61.1339	1932	41.3603	1826	40.296	2239	40.9622	2025	44.9792	2718	55.9501	2425	52.2412	chr12	21431745	21443952	-	2903	-	GO:0006511;GO:0031461;GO:0031625	K10609	cullin-4
MELO3C002739.2	0	0	0	0	0	0	0	0	0	0	1	0.0756552	0	0	0	0	0	0	chr12	21429383	21430084	+	702	-	GO:0016020;GO:0016021	-	Cotton fiber protein
MELO3C002740.2	1	0.0452896	0	0	0	0	0	0	0	0	0	0	6	0.291112	4	0.179859	0	0	chr12	21419724	21421052	-	1329	-	GO:0004672;GO:0005524;GO:0006468;GO:0016301;GO:0016310	-	receptor-like protein kinase 2
MELO3C002741.2	15	1.18796	14	1.11822	1	0.0692102	52	4.25219	28	2.36022	45	3.14467	14	1.18781	28	2.20162	35	2.88007	chr12	21416418	21417436	+	760	-	GO:0003714;GO:0005515;GO:0005634;GO:0006351;GO:0006355;GO:0006952;GO:0009611;GO:0031347;GO:1903507;GO:2000022	-	Protein TIFY 5A
MELO3C002742.2	1457	40.3389	1297	36.2155	1441	34.8649	1748	49.9695	1722	50.7436	2070	50.5693	1395	41.376	1530	42.0562	1480	42.5746	chr12	21402875	21405048	+	2174	-	GO:0009585;GO:0010017	-	Kelch repeat containing F-box protein-like
MELO3C002743.2	0	0	0	0	0	0	0	0	0	0	0	0	0	0	0	0	0	0	chr12	21391602	21391805	-	204	-	-	-	Unknown protein
MELO3C002744.2	0	0	0	0	0	0	7	0.222295	0	0	2	0.0542769	0	0	0	0	0	0	chr12	21375227	21377259	-	1957	-	GO:0016702;GO:0051213;GO:0055114	K09840	9-cis-epoxycarotenoid dioxygenase
MELO3C002745.2	0	0	0	0	0	0	0	0	0	0	0	0	0	0	0	0	0	0	chr12	21370464	21370796	-	333	-	GO:0006754;GO:0006810;GO:0006811;GO:0008289;GO:0009507;GO:0009535;GO:0009536;GO:0009579;GO:0015078;GO:0015986;GO:0015991;GO:0015992;GO:0016020;GO:0016021;GO:0033177;GO:0045263;GO:0046933	K02110	ATP synthase subunit c, chloroplastic
MELO3C002746.2	1403	45.5728	1452	47.567	1734	49.2218	1140	38.2343	1050	36.3013	1163	33.3335	2661	92.5984	1943	62.6607	1950	65.8124	chr12	21364437	21368779	+	1853	-	GO:0003824;GO:0004739;GO:0006086;GO:0008152;GO:0055114	K00162	Pyruvate dehydrogenase E1 component subunit beta
MELO3C002747.2	8	0.165984	12	0.251101	13	0.235711	3	0.0642683	6	0.132499	8	0.14646	43	0.955773	8	0.164794	22	0.474267	chr12	21356609	21359509	+	2901	-	GO:0016301;GO:0016310	-	LRR receptor-like serine/threonine-protein kinase FLS2
MELO3C002748.2	12	0.817057	20	1.37338	8	0.476016	25	1.75756	13	0.942104	14	0.841108	34	2.48005	38	2.5688	49	3.46651	chr12	21343261	21345487	+	884	-	GO:0016787	-	Alpha/beta hydrolase family protein
MELO3C002749.2	1	0.0692634	3	0.209564	0	0	0	0	4	0.294882	0	0	0	0	3	0.2063	0	0	chr12	21339104	21340354	-	869	-	GO:0016020;GO:0016021	-	RACK1C
MELO3C002750.2	73	3.03025	75	3.13984	69	2.50302	66	2.82878	65	2.87179	75	2.74707	166	7.382	144	5.93462	107	4.61492	chr12	21328088	21331533	-	1450	-	GO:0004252;GO:0006508;GO:0008233	-	protease Do-like 5, chloroplastic
MELO3C002751.2	0	0	0	0	0	0	0	0	0	0	0	0	0	0	0	0	0	0	chr12	21312870	21328233	+	240	-	-	-	Unknown protein
MELO3C002752.2	3401	109.002	3244	104.858	3850	107.832	2294	75.9139	2274	77.5716	2711	76.6673	3406	116.945	3757	119.548	3620	120.548	chr12	21296550	21304580	-	1878	-	GO:0003824;GO:0004587;GO:0008483;GO:0016740;GO:0030170	K00819	ornithine aminotransferase, mitochondrial
MELO3C002753.2	658	19.7432	582	17.6119	631	16.5456	1196	37.053	1047	33.4367	1283	33.9681	573	18.4186	545	16.2354	618	19.2666	chr12	21282717	21285227	-	2006	-	GO:0009506;GO:0009736;GO:0009914	-	F-box family protein
MELO3C002754.2	171	4.93881	241	7.01994	224	5.65372	13	0.387676	11	0.338145	20	0.509693	366	11.3245	233	6.68123	281	8.43251	chr12	21271275	21278707	+	2084	-	GO:0003677;GO:0005634;GO:0006351;GO:0006355	-	transcription factor TCP2-like
MELO3C002755.2	80	2.10454	49	1.30003	48	1.10349	87	2.36312	25	0.69999	82	1.90342	215	6.05922	182	4.7535	176	4.81066	chr12	21235657	21240175	+	2288	-	GO:0005215;GO:0006810;GO:0016020;GO:0016021;GO:0022857;GO:0022891;GO:0055085	K08150	Inositol transporter
MELO3C002756.2	39	1.00402	59	1.53187	65	1.46235	15	0.398722	8	0.219206	13	0.295308	86	2.37185	73	1.86585	51	1.36419	chr12	21221842	21228066	+	2338	-	GO:0005215;GO:0006810;GO:0016020;GO:0016021;GO:0022857;GO:0022891;GO:0055085	K08150	Inositol transporter
MELO3C002757.2	91	6.3248	102	7.14984	86	5.22353	164	11.7693	186	13.7595	212	13.0015	158	11.7645	191	13.1799	147	10.6157	chr12	21190412	21194553	-	866	-	GO:0005786;GO:0006614;GO:0008312;GO:0030942;GO:0048500	K03104	signal recognition particle 14 kDa protein
MELO3C002758.2	1030	46.7538	774	35.4333	1183	46.9273	498	23.3404	617	29.8091	727	29.1184	1025	49.8442	1070	48.2212	986	46.5031	chr12	21184321	21187432	+	1326	-	GO:0016020;GO:0016021	-	Glycine-rich family protein
MELO3C002759.2	58	3.38277	69	4.05867	43	2.19166	387	23.3053	164	10.1806	226	11.6307	92	5.74833	24	1.38973	108	6.54474	chr12	21161470	21163270	-	1032	-	GO:0004568;GO:0005975;GO:0006032;GO:0008061;GO:0016998	K01183	Chitinase family protein
MELO3C002760.2	0	0	0	0	0	0	3	0.384417	4	0.528355	5	0.547526	2	0.265902	0	0	0	0	chr12	21156786	21157270	+	485	-	-	-	Unknown protein
MELO3C002761.2	0	0	0	0	0	0	0	0	0	0	0	0	0	0	0	0	0	0	chr12	21142483	21142716	+	234	-	-	-	Unknown protein
MELO3C002762.2	0	0	0	0	0	0	0	0	0	0	0	0	0	0	0	0	0	0	chr12	21136565	21136969	-	207	-	GO:0008375;GO:0016020;GO:0016740;GO:0016757;GO:0030158	-	Xylosyltransferase 1
MELO3C002763.2	24	2.15928	25	2.26844	35	2.75186	39	3.62295	38	3.63886	47	3.73119	36	3.46985	18	1.60785	22	2.05658	chr12	21124372	21125040	-	669	-	GO:0016740;GO:0016757	-	Galactosyltransferase family protein
MELO3C002765.2	0	0	0	0	0	0	0	0	0	0	0	0	0	0	0	0	0	0	chr12	21080151	21085789	+	1343	-	GO:0003677	-	Myb/SANT-like DNA-binding domain protein
MELO3C002766.2	2390	59.5422	2176	54.6734	2556	55.6478	1939	49.8775	1758	46.6154	2200	48.3617	1644	43.8772	1944	48.0837	1907	49.3631	chr12	21071018	21079516	-	2416	-	GO:0000166;GO:0004672;GO:0004674;GO:0005524;GO:0006468;GO:0007165;GO:0016301;GO:0016310;GO:0016740	-	Non-specific serine/threonine protein kinase
MELO3C002767.2	2138	40.6462	1966	37.6953	2499	41.5183	1910	37.4926	1628	32.9421	1998	33.5167	1969	40.1022	2217	41.8459	2115	41.778	chr12	21042901	21049007	-	3166	-	GO:0005634;GO:0008270	-	Nuclear-interacting partner of ALK
MELO3C002768.2	1571	81.0268	1630	84.7873	2219	100.016	567	30.195	786	43.1479	795	36.1803	1712	94.5947	2086	106.817	1575	84.403	chr12	21039653	21040819	-	1167	-	GO:0003690;GO:0006355;GO:0009507	K15032	Transcription termination factor family protein
MELO3C002769.2	9	0.294727	3	0.0990809	6	0.171708	15	0.507188	14	0.487967	12	0.346746	7	0.245576	12	0.390152	6	0.204152	chr12	21036155	21039300	+	1838	-	GO:0005515;GO:0005783;GO:0005794;GO:0005829;GO:0005886;GO:0006898;GO:0016020;GO:0031410;GO:0031982	-	Auxilin-related protein 1
MELO3C002770.2	119	4.88248	104	4.30346	144	5.16317	29	1.22855	56	2.44549	83	3.00486	154	6.769	150	6.11025	126	5.37142	chr12	20971974	20977810	-	1467	-	GO:0016787	-	Metallo-hydrolase/oxidoreductase superfamily protein
MELO3C002771.2	326	4.96631	401	6.16101	481	6.40357	242	3.80655	410	6.6479	467	6.27749	711	11.6037	839	12.6898	837	13.2485	chr12	20956804	20963354	+	3951	-	GO:0003677;GO:0005634;GO:0006351;GO:0006355;GO:0009725;GO:0009734	-	Auxin response factor
MELO3C002772.2	0	0	0	0	0	0	0	0	0	0	0	0	0	0	0	0	0	0	chr12	20903460	20903759	-	300	-	-	-	Unknown protein
MELO3C002773.2	4	0.13265	0	0	0	0	2	0.0684821	1	0.0352965	0	0	41	1.4566	20	0.658494	56	1.92957	chr12	20896660	20898474	+	1815	-	GO:0006629	-	phospholipase A1-Igamma1, chloroplastic
MELO3C002774.2	0	0	0	0	0	0	0	0	0	0	0	0	0	0	0	0	0	0	chr12	20865754	20865931	+	178	-	-	-	Unknown protein
MELO3C002775.2	0	0	0	0	0	0	0	0	0	0	0	0	0	0	0	0	0	0	chr12	20842070	20844597	+	1617	-	GO:0003824;GO:0006520;GO:0016829;GO:0016831;GO:0019752;GO:0030170	K01592	Tyrosine decarboxylase
MELO3C002777.2	49	2.64512	17	0.925525	17	0.80197	22	1.22623	33	1.89604	27	1.28607	102	5.89874	62	3.32288	73	4.09446	chr12	20799390	20801367	-	1115	-	GO:0002376;GO:0006952;GO:0008152;GO:0009862;GO:0016298;GO:0016787;GO:0045087;GO:0080031	-	Salicylic acid-binding protein 2
MELO3C002778.2	0	0	0	0	0	0	0	0	0	0	0	0	0	0	15	0.716526	4	0.199964	chr12	20782365	20785646	-	1251	-	GO:0051087	-	BAG family molecular chaperone regulator 3-like
MELO3C002779.2	0	0	0	0	0	0	0	0	0	0	0	0	0	0	5	0.161947	2	0.0677925	chr12	20780622	20782545	+	1845	-	-	-	outer dense fiber protein 2
MELO3C002780.2	0	0	0	0	0	0	0	0	0	0	0	0	0	0	0	0	0	0	chr12	20747966	20748142	-	177	-	-	-	Unknown protein
MELO3C002781.2	125	3.99137	108	3.47798	58	1.61845	51	1.68144	46	1.56334	50	1.40875	279	9.54392	227	7.19636	202	6.70175	chr12	20736009	20738445	+	1885	-	GO:0004672;GO:0005524;GO:0006468;GO:0016301;GO:0016310	-	protein kinase PINOID
MELO3C002782.2	0	0	0	0	0	0	0	0	0	0	0	0	0	0	0	0	0	0	chr12	20705709	20707288	-	757	-	GO:0004553;GO:0005975;GO:0008152;GO:0016787;GO:0016798;GO:0042973	-	Glucan endo-1,3-beta-glucosidase, putative
MELO3C002784.2	0	0	0	0	0	0	1	0.0663969	1	0.0684435	0	0	0	0	0	0	0	0	chr12	20693437	20694372	-	936	-	-	-	DUF868 family protein (DUF868)
MELO3C002785.2	85	3.40849	65	2.62874	90	3.15388	71	2.93969	77	3.28638	93	3.29062	130	5.58466	63	2.50818	87	3.62482	chr12	20681497	20688339	-	1501	-	GO:0003824;GO:0050662	K07071	epimerase family protein SDR39U1 homolog, chloroplastic-like
MELO3C002786.2	652	24.6506	605	23.0689	712	23.5245	163	6.36309	215	8.65174	246	8.20669	352	14.2572	419	15.7278	387	15.2025	chr12	20669045	20681800	+	1592	-	GO:0006511	K14016	Ubiquitin fusion degradation 1
MELO3C002787.2	53	4.51211	28	2.4041	48	3.57113	19	1.67016	32	2.8996	27	2.02825	29	2.64492	33	2.78928	32	2.8306	chr12	20660368	20661617	-	707	-	GO:0016491;GO:0055114	K00011	Sorbitol-6-phosphate dehydrogenase
MELO3C002788.2	431	17.552	411	16.8804	517	18.3992	224	9.41883	281	12.1798	379	13.6189	265	11.5613	316	12.7765	257	10.8744	chr12	20646933	20658218	+	1478	-	GO:0005737;GO:0006629;GO:0016020;GO:0016021;GO:0016627;GO:0055114	K12345	3-oxo-5-alpha-steroid 4-dehydrogenase family protein
MELO3C002789.2	209	10.0718	213	10.3522	183	7.70677	250	12.4394	280	14.3616	373	15.8607	173	8.93136	221	10.5737	181	9.06284	chr12	20639248	20642672	-	1249	-	-	-	BnaCnng71930D protein
MELO3C002790.2	0	0	0	0	0	0	0	0	0	0	0	0	0	0	0	0	0	0	chr12	20638067	20638264	+	198	-	-	-	Unknown protein
MELO3C002791.2	74	3.08452	57	2.39619	101	3.67907	27	1.16204	20	0.8873	27	0.993054	106	4.73339	75	3.10379	81	3.50805	chr12	20630010	20638256	-	1444	-	GO:0008168;GO:0016740;GO:0032259	-	Ribosomal RNA small subunit methyltransferase H
MELO3C002793.2	3141	53.8929	3230	55.893	3458	51.8501	3013	53.3781	3180	58.0731	3799	57.5156	2061	37.8837	2293	39.0609	2148	38.2933	chr12	20575512	20588898	-	3508	-	GO:0003676;GO:0005634;GO:0006281	K10610	DNA damage-binding protein 1a
MELO3C002794.2	0	0	0	0	0	0	0	0	0	0	0	0	0	0	0	0	0	0	chr12	20546393	20546892	-	477	-	-	-	GATA zinc finger domain-containing protein 10-like isoform X2
MELO3C002795.2	0	0	0	0	0	0	0	0	0	0	0	0	2	0.110983	0	0	0	0	chr12	20508242	20510960	+	1162	-	GO:0016020;GO:0016021;GO:0022857;GO:0055085	-	WAT1-related protein At3g30340-like
MELO3C002796.2	40	0.838008	37	0.781772	53	0.970341	16	0.346105	13	0.289878	19	0.351232	30	0.673317	51	1.0608	45	0.979547	chr12	20496864	20503642	+	2873	-	GO:0005886	-	BZIP domain class transcription factor (DUF630 and DUF632)
MELO3C002797.2	1	0.18075	0	0	1	0.157957	0	0	0	0	0	0	0	0	0	0	0	0	chr12	20489377	20489709	+	333	-	GO:0005576;GO:0005618;GO:0009664;GO:0016020	-	Expansin
MELO3C002798.2	83	2.96484	93	3.3504	88	2.74705	99	3.65139	79	3.00355	134	4.22358	125	4.78348	123	4.36218	134	4.9734	chr12	20487087	20488771	+	1685	-	GO:0003690;GO:0006355	K15032	transcription termination factor MTERF8, chloroplastic-like
MELO3C002800.2	169	15.2505	150	13.6515	185	14.5891	96	8.94476	138	13.2544	155	12.3419	250	24.1684	258	23.1149	270	25.3155	chr12	20446772	20448413	+	667	-	GO:0003735;GO:0005622;GO:0005840;GO:0006412	K02913	50S ribosomal protein L33-like
MELO3C002801.2	1454	27.6687	1794	34.43	1809	30.0832	174	3.4188	200	4.05078	260	4.36566	697	14.2091	757	14.3019	688	13.6031	chr12	20433637	20446634	-	3163	-	GO:0003824;GO:0008152;GO:0016740	K05288	GPI ethanolamine phosphate transferase 3 isoform X1
MELO3C002802.2	0	0	0	0	2	0.299714	0	0	0	0	0	0	0	0	0	0	0	0	chr12	20409811	20410161	-	351	-	-	-	Unknown protein
MELO3C002803.2	562	8.57676	665	10.2353	654	8.72217	1000	15.7575	864	14.0341	1230	16.5632	552	9.02477	525	7.95464	644	10.2117	chr12	20394708	20408445	-	3944	-	GO:0005215;GO:0006810;GO:0006811;GO:0006821;GO:0015377;GO:0016020;GO:0016021;GO:0055085;GO:1902476	-	Cation-chloride cotransporter 1
MELO3C002805.2	790	16.1405	855	17.6176	1064	18.9973	744	15.6951	617	13.4171	736	13.2685	828	18.1231	899	18.2358	872	18.5111	chr12	20365731	20372303	-	2946	-	GO:0003723;GO:0046872	K14404	30-kDa cleavage and polyadenylation specificity factor 30
MELO3C002806.2	583	11.543	671	13.3987	643	11.1255	293	5.98987	261	5.50015	363	6.34175	448	9.50251	431	8.47231	417	8.57849	chr12	20355996	20361458	-	3040	-	GO:0006904;GO:0016192	-	sec1 family domain-containing protein MIP3
MELO3C002807.2	13	0.22556	15	0.262483	14	0.212279	199	3.5651	25	0.461683	47	0.719564	19	0.35317	18	0.310075	16	0.288446	chr12	20322776	20330317	-	3469	-	GO:0003677;GO:0005634;GO:0008289	K09338	Homeobox leucine-zipper protein
MELO3C002808.2	94	3.86465	103	4.27081	108	3.88031	6	0.254703	5	0.218795	5	0.181387	80	3.52357	56	2.28584	54	2.30675	chr12	20301645	20305926	-	1464	-	GO:0005096;GO:0043547	K12486	ADP-ribosylation factor GTPase-activating protein AGD12-like
MELO3C002809.2	6	0.482807	6	0.486927	15	1.05481	0	0	0	0	5	0.355013	6	0.51723	10	0.798908	0	0	chr12	20295559	20296371	+	748	-	GO:0016020;GO:0016021	-	Transmembrane protein, putative
MELO3C002810.2	1199	18.06	1160	17.6217	1363	17.9413	509	7.91618	511	8.19225	697	9.26368	1189	19.1863	1349	20.1737	1480	23.1625	chr12	20280855	20289206	+	3996	-	GO:0008270	-	Zinc ion-binding protein
MELO3C002811.2	14	2.5928	13	2.42814	11	1.7803	5	0.956115	2	0.394234	6	0.980492	15	2.97606	10	1.83872	11	2.11669	chr12	20283315	20283746	-	325	-	GO:0008270	-	SWIM zinc finger family protein
MELO3C002812.2	24	5.2339	22	4.83869	28	5.33621	12	2.70206	20	4.64225	8	1.53942	30	7.00884	24	5.19637	36	8.15721	chr12	20281631	20281906	-	276	-	GO:0016020;GO:0016021	-	Tetratricopeptide repeat protein 1
MELO3C002813.2	275	22.2476	315	25.7011	377	26.6534	98	8.18609	124	10.6772	147	10.4935	411	35.6207	474	38.0718	377	31.6896	chr12	20236184	20247088	+	744	-	GO:0004616;GO:0006574;GO:0008442;GO:0009083;GO:0016491;GO:0051287;GO:0055114	K00020	3-hydroxyisobutyrate dehydrogenase
MELO3C002814.2	11	0.185511	10	0.170086	17	0.250545	0	0	1	0.0179499	0	0	23	0.415542	10	0.167437	12	0.210273	chr12	20224676	20228732	+	3569	-	GO:0004672;GO:0005524;GO:0006468;GO:0016020;GO:0016021;GO:0016301;GO:0016310	-	LRR receptor-like kinase family protein
MELO3C002815.2	0	0	0	0	0	0	0	0	1	0.0315582	0	0	0	0	0	0	0	0	chr12	20205429	20207563	+	2030	-	GO:0004857;GO:0005576;GO:0005618;GO:0016020;GO:0016021;GO:0016787;GO:0030599;GO:0042545;GO:0043086;GO:0045330;GO:0045490;GO:0071555	K01051	Pectinesterase
MELO3C002816.2	1948	73.0529	1900	71.8609	2337	76.5892	2946	114.073	3288	131.24	3846	127.265	1873	75.2483	2417	89.9911	2275	88.6451	chr12	20191388	20201876	+	1605	-	GO:0005524;GO:0005525;GO:0005737;GO:0016887;GO:0043022;GO:0043023	K19788	obg-like ATPase 1
MELO3C002819.2	213	6.56449	177	5.50155	200	5.38656	88	2.8003	77	2.52578	98	2.66502	168	5.54678	193	5.90545	188	6.0201	chr12	20111114	20124661	-	1953	-	GO:0001731;GO:0003723;GO:0003743;GO:0005737;GO:0005852;GO:0006413;GO:0006446;GO:0016282;GO:0033290	K03254	eukaryotic translation initiation factor 3 subunit A-like
MELO3C002820.2	1	0.340056	0	0	0	0	0	0	0	0	2	0.600113	0	0	1	0.337617	0	0	chr12	20110414	20110590	+	177	-	-	-	Unknown protein
MELO3C002821.2	151	25.4585	113	19.2143	150	22.1007	72	12.5339	88	15.7915	92	13.6866	181	32.6922	174	29.1259	160	28.0285	chr12	20104627	20104983	-	357	-	-	K03254	Unknown protein
MELO3C002822.2	4199	75.8288	3949	71.9227	4737	74.757	3521	65.6529	3846	73.9234	4130	65.8098	2825	54.6534	3381	60.6189	3043	57.0972	chr12	20146641	20156494	-	3333	-	GO:0001731;GO:0003723;GO:0003743;GO:0005737;GO:0005852;GO:0006413;GO:0006446;GO:0016282;GO:0033290	K03254	eukaryotic translation initiation factor 3 subunit A-like
MELO3C002823.2	0	0	0	0	0	0	0	0	0	0	0	0	0	0	0	0	0	0	chr12	20014947	20018749	-	2746	-	GO:0005634;GO:0006792;GO:0010438;GO:0090568	-	Protein SULFUR DEFICIENCY-INDUCED 1
MELO3C002826.2	591	9.54191	713	11.6099	697	9.83424	37	0.616807	29	0.498345	41	0.584096	491	8.49258	658	10.5475	656	11.0047	chr12	20064745	20078518	-	3728	-	GO:0001510;GO:0008168;GO:0008171;GO:0008173;GO:0016740;GO:0032259	-	Small RNA 2'-O-methyltransferase
MELO3C002828.2	931	30.0304	800	26.0251	963	27.1455	345	11.4903	439	15.0716	451	12.8363	984	34.003	911	29.1746	889	29.7947	chr12	19993375	20000736	-	1866	-	GO:0000105;GO:0004399;GO:0008152;GO:0008270;GO:0008652;GO:0009507;GO:0009536;GO:0009570;GO:0016491;GO:0046872;GO:0051287;GO:0055114	K00013	Histidinol dehydrogenase, chloroplastic
MELO3C002829.2	115	5.55525	109	5.31034	147	6.20559	116	5.7858	194	9.97451	133	5.66904	60	3.10504	49	2.35005	54	2.71034	chr12	19990016	19992848	+	1246	-	GO:0005576;GO:0005618;GO:0030145;GO:0045735;GO:0046872	-	Germin-like protein 1
MELO3C002830.2	759	25.6652	668	22.7809	756	22.3401	198	6.91303	242	8.7097	286	8.5334	334	12.0993	489	16.4167	380	13.3509	chr12	19959336	19962893	+	1780	-	GO:0003924;GO:0005200;GO:0005525;GO:0005874;GO:0007010;GO:0007017	K07375	tubulin beta chain
MELO3C002831.2	223	5.22881	213	5.03695	252	5.16367	389	9.41775	438	10.9309	448	9.2689	221	5.55137	307	7.14678	270	6.57788	chr12	19940500	19951661	+	2567	-	-	-	Pentatricopeptide repeat-containing protein
MELO3C002832.2	38	1.38535	29	1.06627	37	1.1788	230	8.65773	260	10.0887	342	11.0016	77	3.00731	60	2.17171	59	2.23488	chr12	19934284	19935934	-	1651	-	GO:0016020;GO:0016021	-	Ethylene-responsive nuclear / ethylene-regulated nuclear protein (ERT2)-like protein
MELO3C002833.2	0	0	0	0	0	0	0	0	0	0	0	0	0	0	0	0	0	0	chr12	19918076	19919001	-	471	-	-	-	Unknown protein
MELO3C002835.2	1035	18.8207	985	18.0644	1195	18.99	1458	27.3749	1737	33.6186	2208	35.428	955	18.6041	928	16.754	1073	20.2731	chr12	19878685	19891261	-	3310	-	GO:0006364;GO:0032040	K14555	transducin beta-like protein 3
MELO3C002837.2	952	10.873	1042	12.0025	1216	12.1369	957	11.2856	1093	13.2867	1338	13.4841	837	10.2412	932	10.5683	876	10.3954	chr12	19852445	19865924	-	5270	-	-	-	Maternal effect embryo arrest 22
MELO3C002839.2	7195	265.359	13863	515.646	13193	425.214	43	1.63746	40	1.57017	35	1.139	3022	119.401	1267	46.3932	1582	60.6226	chr12	19849853	19851484	+	1632	-	GO:0003824;GO:0016491;GO:0016614;GO:0050660;GO:0055114	-	FAD-binding Berberine family protein
MELO3C002841.2	0	0	0	0	0	0	0	0	0	0	0	0	0	0	0	0	0	0	chr12	19786976	19788860	+	1735	-	GO:0003824;GO:0016491;GO:0016614;GO:0050660;GO:0055114	-	FAD-binding Berberine family protein
MELO3C002842.2	0	0	0	0	0	0	0	0	0	0	0	0	0	0	0	0	0	0	chr12	19767973	19770675	+	1951	-	GO:0003824;GO:0016491;GO:0016614;GO:0050660;GO:0055114	-	FAD-binding Berberine family protein
MELO3C002843.2	23	0.742686	2	0.0651326	0	0	0	0	4	0.137474	4	0.11397	21	0.726453	4	0.128237	13	0.43616	chr12	19753558	19757772	+	1864	-	GO:0003824;GO:0016491;GO:0016614;GO:0050660;GO:0055114	-	reticuline oxidase-like protein
MELO3C002844.2	4	0.13664	13	0.44787	2	0.0597046	0	0	0	0	0	0	3	0.109787	0	0	0	0	chr12	19706220	19707981	+	1762	-	GO:0003824;GO:0016491;GO:0016614;GO:0050660;GO:0055114	-	tetrahydrocannabinolic acid synthase-like
MELO3C002845.2	0	0	0	0	0	0	0	0	0	0	0	0	0	0	0	0	0	0	chr12	19683598	19686082	+	1641	-	GO:0003824;GO:0016491;GO:0016614;GO:0050660;GO:0055114	-	cannabidiolic acid synthase-like 1
MELO3C002846.2	0	0	0	0	0	0	0	0	0	0	0	0	0	0	0	0	0	0	chr12	19619616	19621887	+	985	-	GO:0006508;GO:0008233;GO:0008234;GO:0016787	-	Cysteine protease
MELO3C002849.2	0	0	0	0	0	0	0	0	0	0	0	0	0	0	0	0	0	0	chr12	19558063	19558335	-	273	-	-	-	Unknown protein
MELO3C002850.2	1	0.0313652	0	0	0	0	0	0	0	0	0	0	0	0	0	0	0	0	chr12	19546537	19549083	-	1919	-	GO:0003824;GO:0016491;GO:0016614;GO:0050660;GO:0055114	-	tetrahydrocannabinolic acid synthase-like
MELO3C002851.2	2	0.0661791	0	0	0	0	0	0	0	0	0	0	0	0	0	0	0	0	chr12	19527655	19530990	-	1819	-	GO:0003824;GO:0016491;GO:0016614;GO:0050660;GO:0055114	-	tetrahydrocannabinolic acid synthase-like
MELO3C002852.2	6	0.203459	3	0.102598	1	0.0296337	0	0	4	0.144368	3	0.0897633	1	0.0363275	0	0	0	0	chr12	19502123	19504515	-	1775	-	GO:0003824;GO:0016491;GO:0016614;GO:0050660;GO:0055114	-	cannabidiolic acid synthase-like
MELO3C002853.2	6	0.175055	11	0.323674	1	0.0254967	22	0.662746	26	0.807387	38	0.978274	6	0.187537	3	0.0869001	0	0	chr12	19472111	19474681	-	2063	-	GO:0003824;GO:0016491;GO:0016614;GO:0050660;GO:0055114	-	tetrahydrocannabinolic acid synthase-like
MELO3C002855.2	29	2.46541	30	2.57219	20	1.48587	5	0.438894	2	0.180969	7	0.525099	7	0.637527	15	1.26607	23	2.03162	chr12	19433295	19434427	+	708	-	-	-	Unknown protein
MELO3C002856.2	51	1.41852	45	1.26232	86	2.09038	7	0.201032	12	0.355248	15	0.368138	35	1.0429	49	1.35312	56	1.61837	chr12	19427920	19438746	-	2164	-	GO:0003824;GO:0016491;GO:0016614;GO:0050660;GO:0055114	-	cannabidiolic acid synthase-like
MELO3C002857.2	0	0	0	0	0	0	0	0	0	0	0	0	0	0	0	0	0	0	chr12	19418981	19419220	-	240	-	-	-	Unknown protein
MELO3C002860.2	0	0	0	0	0	0	0	0	0	0	0	0	0	0	0	0	0	0	chr12	19389662	19392768	-	1973	-	GO:0003824;GO:0016491;GO:0016614;GO:0050660;GO:0055114	-	tetrahydrocannabinolic acid synthase-like
MELO3C002861.2	0	0	0	0	0	0	0	0	0	0	0	0	0	0	0	0	0	0	chr12	19376181	19378227	-	1783	-	GO:0003824;GO:0016491;GO:0016614;GO:0050660;GO:0055114	-	cannabidiolic acid synthase-like 2
MELO3C002862.2	0	0	0	0	0	0	0	0	0	0	0	0	0	0	0	0	0	0	chr12	19353944	19354150	-	207	-	-	-	Unknown protein
MELO3C002863.2	1	0.0310738	1	0.031339	0	0	18	0.577519	13	0.429954	19	0.520955	0	0	0	0	0	0	chr12	19343076	19345362	+	1937	-	GO:0006810;GO:0016021	K19996	patellin-4
MELO3C002865.2	1141	22.1967	1057	20.7381	1321	22.4578	500	10.0432	502	10.3942	513	8.80589	1083	22.5705	1247	24.0849	1276	25.7916	chr12	19269119	19317578	+	3094	-	GO:0003678;GO:0005524;GO:0006260;GO:0032508	K17680	twinkle homolog protein, chloroplastic/mitochondrial isoform X1
MELO3C002869.2	83	3.44061	87	3.6372	84	3.04296	19	0.813224	23	1.01477	28	1.02416	52	2.30925	74	3.04553	75	3.2303	chr12	19214705	19216156	-	1452	-	GO:0003690;GO:0006355	-	transcription termination factor MTERF15, mitochondrial
MELO3C002870.2	1	0.0647203	1	0.0652727	2	0.113118	3	0.200476	6	0.41331	5	0.285538	0	0	0	0	0	0	chr12	19210790	19211719	-	930	-	GO:0046983	-	transcription factor bHLH52
MELO3C002871.2	2	0.0783723	0	0	0	0	3	0.121382	8	0.333662	2	0.0691536	0	0	2	0.0778103	0	0	chr12	19208323	19210071	-	1536	-	GO:0004672;GO:0005524;GO:0006468;GO:0016020;GO:0016021;GO:0016301;GO:0016310	-	Receptor-like kinase
MELO3C002872.2	186	7.95687	193	8.32679	230	8.5984	31	1.36928	19	0.865102	25	0.943674	284	13.0154	197	8.36701	211	9.37857	chr12	19205204	19208303	+	1407	-	GO:0042742	-	Short-chain dehydrogenase/reductase family protein
MELO3C002873.2	0	0	0	0	0	0	0	0	0	0	0	0	0	0	0	0	0	0	chr09	6706732	6707115	-	384	-	GO:0030246	-	Phloem lectin
MELO3C002874.2	537	33.2531	537	33.5369	1062	57.4701	1053	67.3264	1095	72.1698	1124	61.4152	3452	229.002	7729	475.177	5009	322.28	chr09	6713016	6715510	-	972	-	GO:0030246	-	26 kDa phloem lectin
MELO3C002875.2	2	0.0757582	2	0.0764047	1	0.0331024	4	0.156444	3	0.12095	2	0.066847	1	0.0405798	3	0.112822	0	0	chr09	6787189	6790868	+	1589	-	GO:0003700;GO:0006355;GO:0043565	-	WRKY family transcription factor
MELO3C002876.2	0	0	0	0	0	0	0	0	0	0	0	0	0	0	0	0	0	0	chr07	22146499	22146687	+	189	-	-	-	Unknown protein
MELO3C002877.2	108	0.881067	120	0.987318	144	1.02662	76	0.640174	100	0.868299	113	0.813422	142	1.24103	164	1.32832	153	1.29688	chr09	6828336	6845661	+	7378	-	GO:0007165;GO:0043531	-	TMV resistance protein N-like
MELO3C002878.2	6062	280.024	5552	258.654	6269	253.068	4934	235.33	4694	230.784	5725	233.35	6182	305.927	7511	344.47	7098	340.675	chr09	6853320	6856784	+	1303	-	GO:0003746;GO:0003924;GO:0005525;GO:0005737;GO:0006414	K03231	elongation factor 1-alpha
MELO3C002879.2	357	20.5036	396	22.9376	428	21.4816	239	14.1729	280	17.1161	427	21.6393	322	19.812	366	20.8698	337	20.1102	chr09	6860120	6864072	-	1048	-	GO:0016020;GO:0016021	K17966	Transmembrane 70, mitochondrial
MELO3C002880.2	271	17.984	55	3.68103	67	3.88554	1613	110.522	858	60.6021	779	45.6149	659	46.8503	425	28.0014	306	21.099	chr09	6891371	6892277	+	907	-	-	-	Unknown protein
MELO3C002881.2	453	10.5929	480	11.32	571	11.6684	313	7.55717	440	10.951	470	9.69763	634	15.8823	581	13.4886	687	16.6915	chr09	6909279	6912445	-	2574	-	GO:0005634	-	Serine/threonine protein phosphatase 7 long form
MELO3C002884.2	3	0.403959	5	0.679011	16	1.88277	53	7.36871	73	10.4622	51	6.05953	4	0.577014	5	0.668437	5	0.699537	chr09	6983522	6983968	-	447	-	-	-	Unknown protein
MELO3C002885.2	608	25.9542	595	25.616	777	28.9858	1536	67.7011	1326	60.2466	1778	66.9713	555	25.3809	520	22.0385	617	27.3662	chr09	6985226	6990067	+	1410	-	GO:0005634;GO:0006355	-	transcription factor GTE1
MELO3C002886.2	321	15.9677	410	20.569	495	21.5181	135	6.93381	134	7.09459	165	7.24227	268	14.2818	310	15.31	286	14.7819	chr09	7019426	7032680	+	1210	-	GO:0019905	-	Alpha-taxilin
MELO3C002888.2	15	2.10454	21	2.9715	14	1.71654	20	2.89732	25	3.73328	22	2.72359	16	2.4049	25	3.48242	15	2.18667	chr09	7048343	7049574	+	429	-	GO:0003743;GO:0003824;GO:0005674;GO:0006366;GO:0006367;GO:0006413	K03139	transcription initiation factor IIF subunit beta-like
MELO3C002890.2	1	0.0260224	3	0.0787336	2	0.0454819	0	0	0	0	0	0	1	0.0278778	0	0	2	0.0540758	chr09	7094076	7096514	-	2313	-	GO:0003676;GO:0008270	-	Zf-CCHC domain-containing protein
MELO3C002891.2	1272	38.4345	905	27.5787	873	23.052	408	12.729	206	6.625	227	6.05219	1270	41.1101	1329	39.8689	1747	54.8469	chr09	7102210	7104700	+	1992	-	GO:0001522;GO:0003723;GO:0009451;GO:0009982	-	Pseudouridine synthase, RsuA/RluB/C/D/E/F
MELO3C002892.2	4	0.0529142	13	0.173439	4	0.0462416	3	0.0409763	3	0.0422394	1	0.0116725	5	0.0708586	4	0.0525348	5	0.0687238	chr09	7126439	7139929	-	4550	-	GO:0000166;GO:0003676;GO:0003677;GO:0003887;GO:0005634;GO:0006260;GO:0006281;GO:0008270;GO:0008408;GO:0008622;GO:0016740;GO:0016779;GO:0071897;GO:0090305	K02324	DNA polymerase epsilon catalytic subunit A
MELO3C002893.2	0	0	0	0	0	0	0	0	0	0	0	0	0	0	0	0	0	0	chr09	7146402	7147129	+	599	-	-	-	GATA zinc finger domain-containing protein 10-like isoform X2
MELO3C002894.2	0	0	0	0	0	0	0	0	0	0	0	0	0	0	0	0	0	0	chr09	7189915	7190333	+	351	-	-	-	Unknown protein
MELO3C002895.2	0	0	0	0	0	0	0	0	0	0	0	0	0	0	0	0	0	0	chr09	7197217	7197555	+	339	-	GO:0003677	-	Myb/SANT-like DNA-binding domain protein
MELO3C002896.2	116	4.11919	80	2.86507	117	3.63078	33	1.20995	17	0.642521	24	0.752	62	2.35861	77	2.71468	75	2.7672	chr09	7202823	7208940	+	1695	-	GO:0001522;GO:0003723;GO:0009451;GO:0009982	-	Pseudouridine synthase family protein
MELO3C002897.2	3013	34.1529	3223	36.8451	3851	38.1472	10978	128.485	10287	124.109	12468	124.703	2426	29.4598	2484	27.9547	2208	26.0048	chr09	7208775	7217442	-	5310	-	GO:0003677;GO:0005634	K04650	Nuclear receptor corepressor 1
MELO3C002898.2	0	0	0	0	0	0	0	0	0	0	0	0	0	0	0	0	0	0	chr09	7279796	7280009	-	214	-	GO:0009507;GO:0009521;GO:0009523;GO:0009535;GO:0009536;GO:0009579;GO:0009767;GO:0009772;GO:0015979;GO:0016020;GO:0016021;GO:0016168;GO:0018298;GO:0019684;GO:0045156	K02704	Photosystem II CP47 reaction center protein
MELO3C002899.2	2	0.103686	1	0.0522856	0	0	1	0.0535293	1	0.0551792	2	0.0914901	0	0	0	0	0	0	chr09	7287050	7289187	+	1161	-	GO:0016021	-	tetraspanin-6-like
MELO3C002900.2	627	30.3613	560	27.3484	616	26.0671	286	14.2994	368	18.9664	405	17.3045	529	27.4422	541	26.009	621	31.2442	chr09	7291263	7296057	-	1243	-	GO:0004252;GO:0006508;GO:0006890;GO:0016021	-	rhomboid-like protein 19
MELO3C002901.2	0	0	0	0	0	0	0	0	0	0	0	0	0	0	0	0	0	0	chr09	7324994	7325350	-	357	-	GO:0005634;GO:0005737	-	Armadillo/beta-catenin repeat family protein
MELO3C002903.2	898	40.4873	822	37.377	1064	41.9222	412	19.1796	497	23.8497	644	25.6201	833	40.2344	935	41.8532	760	35.6025	chr09	7344384	7358773	+	1335	-	GO:0003676;GO:0008270	-	Zinc knuckle (CCHC-type) family protein
MELO3C002904.2	0	0	0	0	1	0.0212696	0	0	0	0	0	0	0	0	0	0	0	0	chr09	7363723	7366195	+	2473	-	GO:0004553;GO:0005975;GO:0030246	-	beta-galactosidase-like
MELO3C002906.2	457	15.8907	511	17.92	522	15.862	101	3.62617	101	3.73794	107	3.28294	431	16.0551	484	16.7088	506	18.2811	chr09	7373907	7383708	+	1731	-	GO:0003676;GO:0004523;GO:0090502	-	Retrotransposon protein Ty3-gypsy subclass
MELO3C002907.2	0	0	0	0	0	0	0	0	0	0	0	0	0	0	0	0	0	0	chr09	7465955	7466158	+	204	-	-	-	stress response protein NST1-like
MELO3C002909.2	0	0	0	0	0	0	0	0	0	0	0	0	0	0	0	0	0	0	chr09	7470920	7471426	+	507	-	-	-	Unknown protein
MELO3C002910.2	495	11.7949	482	11.5832	475	9.89109	159	3.91189	154	3.90567	205	4.31019	608	15.5204	767	18.1451	716	17.7267	chr09	7478793	7482245	-	2526	-	GO:0005634	K18810	cyclin-D1-1-like
MELO3C002911.2	0	0	0	0	0	0	0	0	0	0	0	0	0	0	0	0	0	0	chr09	7485702	7485878	+	177	-	-	-	Unknown protein
MELO3C002912.2	702	22.4155	817	26.3102	723	20.1749	165	5.43996	172	5.84554	205	5.77589	592	20.2509	532	16.8655	485	16.0908	chr09	7509520	7541208	+	1885	-	GO:0003676	-	RNA recognition motif
MELO3C002913.2	0	0	0	0	0	0	0	0	0	0	0	0	0	0	0	0	0	0	chr09	7564013	7564342	+	330	-	-	-	Unknown protein
MELO3C002914.2	0	0	0	0	0	0	0	0	0	0	0	0	0	0	0	0	0	0	chr09	7587376	7587669	-	294	-	-	-	stress response protein NST1-like
MELO3C002915.2	0	0	0	0	1	0.0617368	0	0	0	0	0	0	0	0	0	0	0	0	chr09	7597991	7599311	+	852	-	GO:0005576;GO:0005618;GO:0016787;GO:0030599;GO:0042545;GO:0045330;GO:0045490;GO:0071555	K01051	Pectinesterase
MELO3C002916.2	395	17.7691	401	18.1929	443	17.4153	68	3.15847	43	2.05883	68	2.69916	192	9.25293	270	12.0588	212	9.90896	chr09	7647352	7664283	-	1338	-	GO:0000775	K11548	Kinetochore protein Nuf2
MELO3C002917.2	11	3.94101	13	4.6973	21	6.57497	0	0	0	0	1	0.316131	3	1.15145	8	2.84563	9	3.35028	chr09	7682033	7682200	+	168	-	-	-	Unknown protein
MELO3C002919.2	1428	42.0299	1460	43.3385	1707	43.906	364	11.0619	411	12.8753	418	10.8557	919	28.9772	1330	38.8648	1201	36.7281	chr09	7733028	7751486	-	2045	-	-	-	Appr-1-p processing enzyme family protein
MELO3C002920.2	1152	72.0029	741	46.7096	1317	71.9355	537	34.6554	434	28.8716	483	26.6377	768	51.4244	753	46.7269	682	44.2901	chr09	7759274	7760604	-	963	-	GO:0003743;GO:0006413	-	Translation elongation/initiation factor/Ribosomal, beta-barrel
MELO3C002921.2	2	0.27359	4	0.551851	1	0.119545	22	3.10737	14	2.03837	24	2.89691	57	8.35326	109	14.8038	53	7.53306	chr09	7767607	7768046	-	440	-	GO:0004869;GO:0010466;GO:0010951;GO:0030414	-	Cysteine proteinase inhibitor
MELO3C002922.2	1421	31.3871	1186	26.42	1749	33.7604	448	10.2173	500	11.7547	527	10.2712	531	12.565	652	14.2981	606	13.9077	chr09	7798209	7801304	+	2725	-	GO:0003993;GO:0016020;GO:0016021;GO:0016311;GO:0016787;GO:0046872	-	Purple acid phosphatase
MELO3C002923.2	345	21.1461	284	17.5558	356	19.0688	133	8.41712	157	10.2423	162	8.76152	199	13.067	247	15.0309	232	14.7749	chr09	7802736	7806472	-	982	-	GO:0016020;GO:0016021	-	Reticulon family protein
MELO3C002925.2	0	0	0	0	1	0.10823	4	0.511502	8	1.05454	3	0.327839	1	0.132678	8	0.983676	6	0.772082	chr09	7859988	7860473	+	486	-	GO:0004869;GO:0010466;GO:0010951;GO:0030414	-	Cysteine proteinase inhibitor
MELO3C002926.2	1	0.12592	0	0	0	0	0	0	0	0	0	0	0	0	0	0	0	0	chr09	7884731	7885208	+	478	-	GO:0004869;GO:0010466;GO:0010951;GO:0030414	-	Cysteine proteinase inhibitor
MELO3C002928.2	1275	52.2055	1309	54.0551	1498	53.6017	1011	42.7422	1007	43.8854	1241	44.8364	1384	60.7089	1558	63.3357	1463	62.2408	chr09	7949013	7952647	+	1470	-	GO:0016301;GO:0016310	-	Leucine-rich repeat receptor protein kinase
MELO3C002929.2	19	1.63606	31	2.69215	20	1.505	675	60.0136	458	41.9755	687	52.1982	52	4.79689	18	1.53884	23	2.05778	chr09	7977943	7978641	-	699	-	GO:0008270;GO:0016020;GO:0016021;GO:0046872	-	RING zinc finger protein-like
MELO3C002930.2	619	29.711	720	34.8537	698	29.278	240	11.8943	254	12.9761	282	11.9434	587	30.1838	643	30.6416	575	28.676	chr09	8003055	8008600	+	1254	-	GO:0000502	K06694	26S proteasome non-ATPase regulatory subunit 10
MELO3C002931.2	1484	20.2269	1619	22.2552	1562	18.6053	1593	22.4187	1218	17.6696	1530	18.4009	1266	18.4858	1375	18.6068	1353	19.1609	chr09	8024604	8038708	+	4416	-	GO:0005634;GO:0006355	K11644	Paired amphipathic helix SIN3-like protein
MELO3C002934.2	821	12.9192	570	9.04602	993	13.6553	656	10.6585	495	8.29052	639	8.87249	752	12.6771	686	10.7174	643	10.513	chr09	8064024	8090339	-	3825	-	GO:0003676;GO:0004386;GO:0005524	-	DEAD-box ATP-dependent RNA helicase ISE2
MELO3C002936.2	151	6.45961	40	1.72576	54	2.01875	448	19.7882	202	9.1974	193	7.28516	354	16.2234	152	6.45576	223	9.91195	chr09	8121468	8122874	-	1407	-	GO:0004222;GO:0006508;GO:0008233;GO:0008237;GO:0008270;GO:0016787;GO:0031012;GO:0046872	-	Metalloendoproteinase 1, putative
MELO3C002939.2	592	26.5122	555	25.0673	648	25.3606	476	22.0106	414	19.7337	525	20.7461	526	25.236	592	26.3221	512	23.8242	chr09	8197926	8202004	+	1344	-	GO:0016020;GO:0016021	-	F20P5.10 protein
MELO3C002941.2	0	0	1	0.0281818	2	0.0488392	0	0	0	0	8	0.197252	5	0.149678	2	0.0554859	4	0.116135	chr09	8249661	8263967	+	2154	-	GO:0016853;GO:0016866	K15813	Terpene cyclase/mutase family member
MELO3C002943.2	317	7.74673	392	9.66131	254	5.42442	140	3.53254	260	6.76265	264	5.69267	200	5.236	594	14.4119	394	10.0041	chr09	8300374	8313118	+	2463	-	GO:0016853;GO:0016866	K15813	Terpene cyclase/mutase family member
MELO3C002945.2	0	0	0	0	0	0	0	0	0	0	0	0	0	0	0	0	0	0	chr09	8368290	8396743	+	1705	-	GO:0016853;GO:0016866	K15813	Terpene cyclase/mutase family member
MELO3C002946.2	0	0	0	0	0	0	0	0	0	0	0	0	0	0	0	0	0	0	chr09	8482008	8482349	+	342	-	GO:0003676;GO:0004386;GO:0008270	-	ATP-dependent RNA helicase glh-1
MELO3C002947.2	0	0	0	0	0	0	0	0	0	0	0	0	0	0	0	0	0	0	chr09	8486695	8487201	+	507	-	GO:0003676;GO:0005634	-	Zinc finger family protein
MELO3C002948.2	0	0	0	0	0	0	0	0	0	0	0	0	0	0	0	0	0	0	chr09	8528180	8528524	-	345	-	-	-	Unknown protein
MELO3C002949.2	1590	41.5915	1487	39.2291	2243	51.2739	932	25.1723	1078	30.013	1326	30.6058	2089	58.5404	2383	61.8879	1823	49.5471	chr09	8543269	8550091	+	2301	-	GO:0004672;GO:0005524;GO:0006468;GO:0016301;GO:0016310	-	Kinase family protein
MELO3C002950.2	0	0	0	0	0	0	0	0	0	0	0	0	0	0	0	0	0	0	chr09	8585269	8587800	-	1224	-	GO:0004650;GO:0005975	K01184	polygalacturonase-like
MELO3C002951.2	1161	71.4524	1046	64.9243	1289	69.3263	578	36.7293	664	43.4948	757	41.1086	763	50.306	860	52.5482	814	52.0516	chr09	8603451	8615031	+	978	-	GO:0000413;GO:0003755;GO:0016020;GO:0016021;GO:0016853	K09579	Peptidyl-prolyl cis-trans isomerase
MELO3C002952.2	1249	27.5778	514	11.4459	463	8.93386	765	17.4405	724	17.0146	761	14.8264	3236	76.545	4014	87.9933	3290	75.4776	chr09	8665759	8669834	-	2726	-	GO:0016021	-	phosphate transporter PHO1 homolog 3-like
MELO3C002953.2	1651	26.7781	1676	27.4156	1790	25.3715	1960	32.8238	1779	30.7109	2070	29.6248	1236	21.4764	1305	21.0144	1402	23.6268	chr09	8700688	8711572	+	3711	-	GO:0003676;GO:0004527;GO:0004534;GO:0005634;GO:0006139;GO:0008270;GO:0090305;GO:0090503	K12619	5'-3' exoribonuclease 3-like
MELO3C002957.2	0	0	0	0	1	0.307601	0	0	0	0	0	0	1	0.377084	0	0	0	0	chr09	8729684	8729854	-	171	-	-	-	Unknown protein
MELO3C002960.2	768	14.1493	813	15.1062	939	15.1182	111	2.11153	118	2.31388	105	1.70693	494	9.75016	530	9.69449	505	9.66697	chr09	8726357	8753040	+	3267	-	GO:0006511;GO:0031625	K03349	anaphase-promoting complex subunit 2
MELO3C002961.2	0	0	0	0	0	0	0	0	0	0	0	0	0	0	0	0	0	0	chr09	8775762	8778008	+	1522	-	GO:0015996;GO:0047746	K08099	chlorophyllase-1-like
MELO3C002962.2	44	1.90666	23	1.00517	154	5.8318	41	1.83445	21	0.968556	59	2.25593	121	5.61716	94	4.04412	79	3.55691	chr09	8815567	8817536	+	1389	-	GO:0016020;GO:0016021	-	Ankyrin repeat-containing protein, putative
MELO3C002963.2	0	0	0	0	0	0	0	0	0	0	0	0	0	0	0	0	0	0	chr09	8832728	8833066	+	339	-	-	-	protein MNN4-like
MELO3C002964.2	0	0	0	0	0	0	1	0.0670415	0	0	0	0	0	0	0	0	0	0	chr09	8845937	8849474	+	927	-	-	-	Unknown protein
MELO3C002965.2	0	0	0	0	0	0	0	0	0	0	0	0	0	0	0	0	0	0	chr09	8851905	8852102	+	198	-	-	-	Unknown protein
MELO3C002966.2	378	10.5332	499	14.0236	470	11.4453	157	4.5172	217	6.43597	270	6.63875	338	10.0901	324	8.96374	372	10.7705	chr09	8856086	8861410	-	2160	-	GO:0016020;GO:0016021	K15378	Sucrose transporter
MELO3C002967.2	3039	38.0443	3601	45.4646	4275	46.7687	2343	30.2853	2055	27.3814	2405	26.566	3092	41.4676	3734	46.4096	3645	47.4112	chr09	8867478	8881753	-	4808	-	GO:0005509;GO:0006355;GO:0051301	-	cell division cycle and apoptosis regulator protein 1
MELO3C002969.2	0	0	0	0	0	0	0	0	0	0	0	0	0	0	0	0	0	0	chr09	8961193	8962991	-	1461	-	GO:0016020;GO:0016021	-	Ankyrin repeat-containing protein, putative
MELO3C002970.2	0	0	0	0	0	0	0	0	0	0	0	0	0	0	0	0	0	0	chr09	8983564	8984098	-	535	-	GO:0016020;GO:0016021	-	Ankyrin repeat-containing protein, putative
MELO3C002971.2	0	0	0	0	0	0	0	0	0	0	0	0	0	0	0	0	0	0	chr09	9007693	9017956	-	1354	-	GO:0016020;GO:0016021	-	Ankyrin repeat-containing protein
MELO3C002974.2	630	32.1898	566	29.1666	791	35.3195	318	16.7766	419	22.7864	414	18.6651	415	22.7163	537	27.2413	491	26.0666	chr09	9047204	9051529	-	1178	-	GO:0032955;GO:0051301	-	cell division topological specificity factor homolog, chloroplastic-like
MELO3C002975.2	16	1.02779	5	0.323925	13	0.729773	6	0.397956	11	0.752075	7	0.396766	38	2.61504	29	1.84951	30	2.0023	chr09	9075918	9077150	-	937	-	GO:0016020;GO:0016021	-	Transmembrane protein, putative
MELO3C002976.2	2	0.0821145	8	0.331261	0	0	3	0.127178	1	0.0436992	3	0.108683	3	0.131954	6	0.244577	3	0.127978	chr09	9096032	9097497	+	1466	-	GO:0003690;GO:0006355	K15032	transcription termination factor MTERF5, chloroplastic-like
MELO3C002978.2	327	17.3106	179	9.55668	410	18.9674	510	27.8762	548	30.8765	574	26.8119	916	51.948	670	35.2138	527	28.9867	chr09	9146455	9149483	-	1137	-	GO:0016491;GO:0055114	K07119	2-alkenal reductase (NADP(+)-dependent)-like
MELO3C002980.2	402	13.8423	347	12.0504	449	13.511	109	3.87533	108	3.95813	142	4.31443	296	10.919	291	9.94832	297	10.6258	chr09	9243828	9270896	+	1748	-	GO:0016301;GO:0016310	-	glutamate 5-kinase isoform X1
MELO3C002981.2	1018	62.0804	1063	65.3778	1021	54.4117	519	32.6794	512	33.2323	666	35.8371	846	55.2697	984	59.5767	961	60.8912	chr09	9306843	9313141	-	987	-	GO:0006810;GO:0016021	K20352	transmembrane emp24 domain-containing protein p24delta9-like
MELO3C002982.2	0	0	0	0	0	0	0	0	0	0	0	0	0	0	0	0	0	0	chr09	9323428	9324915	-	1122	-	GO:0004650;GO:0005975	K01213	exopolygalacturonase-like
MELO3C002983.2	0	0	0	0	0	0	0	0	0	0	0	0	0	0	0	0	0	0	chr09	9353226	9353450	+	225	-	-	-	Unknown protein
MELO3C002984.2	1459	53.547	1530	56.632	1703	54.6204	1892	71.6969	1693	66.1334	1890	61.206	1115	43.8394	1214	44.2357	1042	39.7349	chr09	9361469	9364583	-	1640	-	-	-	Plant/protein
MELO3C002985.2	0	0	0	0	0	0	0	0	0	0	0	0	0	0	0	0	0	0	chr09	9369655	9370622	-	888	-	GO:0006508;GO:0008233	-	subtilisin-like protease SBT3.17 isoform X1
MELO3C002986.2	529	19.1694	574	20.9776	683	21.6289	206	7.70763	256	9.87366	267	8.53725	480	18.634	545	19.6076	535	20.1434	chr09	9385889	9405931	+	1661	-	GO:0016020;GO:0016021	-	Sporulation protein RMD1
MELO3C002988.2	705	20.599	778	22.9259	869	22.1889	428	12.9122	630	19.5921	717	18.4854	622	19.4696	623	18.0725	579	17.5776	chr09	9423327	9426585	-	2060	-	GO:0003690;GO:0003727;GO:0006355;GO:0008380;GO:0009507;GO:0009658;GO:0019843;GO:0032502;GO:0042255	K15032	Mitochondrial transcription termination factor family protein
MELO3C002989.2	1209	30.1698	1036	26.0733	1292	28.1753	591	15.2277	570	15.1393	616	13.5637	996	26.6266	950	23.5366	945	24.5021	chr09	9451801	9491155	+	2412	-	GO:0005096;GO:0005634;GO:0005635;GO:0005737;GO:0005774;GO:0005783;GO:0005819;GO:0005856;GO:0006913;GO:0009507;GO:0009524;GO:0009651;GO:0016020;GO:0031965;GO:0043547	-	RAN GTPase-activating protein 2
MELO3C002993.2	0	0	0	0	0	0	0	0	0	0	0	0	0	0	0	0	0	0	chr09	9518036	9518314	+	279	-	-	-	Unknown protein
MELO3C002995.2	927	22.1237	941	22.6495	1014	21.1484	419	10.3251	310	7.87453	417	8.78147	657	16.7979	795	18.8374	790	19.5898	chr09	9567405	9573970	-	2522	-	GO:0009737;GO:0016020	-	Chaperone protein dnaJ 16
MELO3C002996.2	0	0	0	0	0	0	0	0	0	0	0	0	0	0	0	0	0	0	chr09	9578992	9582086	+	1137	-	-	-	mucin-5AC-like isoform X3
MELO3C002999.2	181	5.94346	189	6.25912	234	6.71487	384	13.0194	484	16.9157	549	15.9069	252	8.86486	278	9.06318	296	10.099	chr09	9649335	9672824	+	1833	-	GO:0016020;GO:0016021;GO:0016301;GO:0016310	-	Leucine-rich repeat protein kinase family protein
MELO3C003002.2	2	0.101844	4	0.205427	1	0.0445007	10	0.525782	8	0.433591	7	0.314526	17	0.927396	7	0.353899	30	1.58727	chr09	9728272	9729453	+	1182	-	GO:0003677;GO:0003700;GO:0005634;GO:0006351;GO:0006355	K09287	AP2/ERF and B3 domain-containing transcription factor RAV1-like
MELO3C003003.2	0	0	0	0	0	0	0	0	0	0	0	0	0	0	0	0	0	0	chr09	9746256	9746495	+	240	-	-	-	Unknown protein
MELO3C003005.2	466	6.23993	483	6.52276	568	6.64665	63	0.871032	67	0.954889	92	1.08701	664	9.52516	577	7.67086	575	7.99993	chr09	9779825	9786057	-	4495	-	GO:0003723;GO:0004519;GO:0009451;GO:0043231;GO:0090305	-	Pentatricopeptide repeat-containing family protein
MELO3C003007.2	0	0	0	0	0	0	0	0	0	0	0	0	0	0	0	0	0	0	chr09	9826102	9826455	+	354	-	-	-	Unknown protein
MELO3C003008.2	0	0	0	0	0	0	0	0	0	0	0	0	0	0	0	0	0	0	chr09	9849081	9849269	-	189	-	-	-	Unknown protein
MELO3C003009.2	0	0	0	0	0	0	0	0	0	0	0	0	0	0	0	0	0	0	chr09	9856519	9857779	+	1177	-	GO:0003676	-	zinc finger protein WIP6-like
MELO3C003015.2	1	0.0413108	4	0.166654	3	0.108304	70	2.98581	156	6.85919	232	8.45677	334	14.7816	265	10.8689	248	10.6449	chr09	9969394	9971201	-	1457	-	GO:0009507;GO:0016853	K10525	Allene oxide cyclase
MELO3C003017.2	1156	34.4624	1053	31.6597	1142	29.7518	257	7.9108	313	9.93152	329	8.65438	926	29.5739	1029	30.4563	1028	31.8423	chr09	10019343	10022605	+	2019	-	GO:0006629;GO:0009507;GO:0016020;GO:0016298;GO:0016787	K01054	Alpha/beta-Hydrolases superfamily protein
MELO3C003018.2	580	21.7238	559	21.1159	635	20.7846	267	10.3257	287	11.4413	297	9.8156	392	15.7291	477	17.7378	404	15.7222	chr09	10043432	10071839	+	1607	-	GO:0015031	K19476	IST1 homolog
MELO3C003021.2	0	0	0	0	0	0	0	0	0	0	0	0	0	0	0	0	0	0	chr09	10162132	10164336	+	1406	-	GO:0003676;GO:0007275	-	zinc finger protein JAGGED
MELO3C003023.2	403	19.3897	343	16.6437	386	16.2298	668	33.1851	582	29.8039	694	29.4631	313	16.1332	344	16.4323	339	16.9469	chr09	10277822	10279157	-	1251	-	-	-	At1g68490
MELO3C003027.2	291	18.1694	229	14.4202	350	19.0974	93	5.99555	82	5.44935	110	6.06027	171	11.4381	219	13.5758	185	12.0017	chr09	10406523	10414388	+	964	-	GO:0016020;GO:0016021	-	Fiber protein Fb34
MELO3C003028.2	0	0	0	0	0	0	0	0	0	0	0	0	0	0	0	0	0	0	chr09	10449907	10450125	-	219	-	-	-	Unknown protein
MELO3C003029.2	502	11.0114	416	9.20287	623	11.9423	54	1.22302	56	1.30741	31	0.600003	320	7.51969	370	8.05779	366	8.34152	chr09	10452525	10457632	-	2744	-	GO:0016021	-	UPF0695 membrane protein C977.11/PB8B6.06c
MELO3C003032.2	83	4.50474	37	2.02528	82	3.88925	175	9.80686	225	12.9975	310	14.8459	33	1.91874	29	1.56266	33	1.86093	chr09	10490675	10491859	+	1109	-	GO:0003676;GO:0003677;GO:0006355;GO:0008270	-	cold shock protein 2-like
MELO3C003034.2	0	0	0	0	0	0	0	0	0	0	0	0	0	0	0	0	0	0	chr09	10537195	10537365	-	171	-	-	-	Unknown protein
MELO3C003035.2	1	0.0339672	0	0	0	0	0	0	2	0.072306	0	0	2	0.072778	3	0.101171	4	0.141171	chr09	10563887	10567032	-	1772	-	GO:0016020;GO:0016021	K13946	Auxin influx transporter
MELO3C003037.2	0	0	0	0	0	0	1	0.0548521	3	0.169629	0	0	0	0	0	0	0	0	chr09	10634748	10636884	+	1133	-	GO:0016020;GO:0016021	-	Pathogenesis-related thaumatin-like protein
MELO3C003038.2	1847	152.08	1837	152.548	2247	161.685	1572	133.647	1671	146.442	2044	148.505	1327	117.054	1445	118.127	1418	121.313	chr09	10665970	10670537	+	731	-	-	K12162	ubiquitin-fold modifier 1
MELO3C003040.2	0	0	0	0	0	0	0	0	0	0	0	0	0	0	0	0	0	0	chr09	10685914	10686189	-	276	-	-	-	Unknown protein
MELO3C003042.2	0	0	0	0	0	0	0	0	0	0	0	0	0	0	0	0	0	0	chr09	10735732	10735911	+	180	-	-	-	Unknown protein
MELO3C003043.2	81	2.35868	113	3.31858	98	2.49385	115	3.45765	114	3.53323	149	3.82844	195	6.08314	170	4.91481	153	4.62913	chr09	10737281	10739347	+	2067	-	GO:0003723;GO:0004519;GO:0005739;GO:0080156;GO:0090305	-	Pentatricopeptide repeat-containing family protein
MELO3C003044.2	59	2.20161	61	2.29567	59	1.92398	18	0.693524	16	0.635468	9	0.296336	100	3.9976	76	2.81564	70	2.71401	chr09	10767733	10769438	-	1613	-	GO:0003676	-	C2H2-like zinc finger protein
MELO3C003047.2	251	5.07479	306	6.2396	250	4.41718	26	0.542773	44	0.946851	50	0.892005	150	3.24897	202	4.05481	184	3.86534	chr09	10782168	10788111	+	2977	-	GO:0004672;GO:0004712;GO:0005524;GO:0006468;GO:0007093;GO:0016301;GO:0016310;GO:0051304	K08866	serine/threonine-protein kinase MPS1 isoform X1
MELO3C003048.2	682	20.4736	573	17.3482	842	22.0893	81	2.5107	72	2.30052	78	2.06612	630	20.261	764	22.7707	601	18.746	chr09	10841742	10854820	-	2005	-	GO:0008168;GO:0016740;GO:0032259	K11426	Histone-lysine N-methyltransferase ASHR1-like protein
MELO3C003051.2	0	0	0	0	0	0	0	0	0	0	0	0	0	0	0	0	0	0	chr09	10895223	10895968	-	678	-	-	-	phosphopantothenoylcysteine decarboxylase subunit VHS3-like
MELO3C003052.2	0	0	0	0	0	0	0	0	0	0	0	0	0	0	0	0	0	0	chr09	10939252	10939431	+	180	-	-	-	Unknown protein
MELO3C003053.2	0	0	0	0	0	0	0	0	0	0	0	0	0	0	0	0	0	0	chr09	10944791	10944940	+	150	-	-	-	Unknown protein
MELO3C003054.2	0	0	0	0	0	0	0	0	0	0	0	0	0	0	0	0	0	0	chr09	10953086	10953289	-	204	-	-	-	Unknown protein
MELO3C003055.2	1862	26.6588	1474	21.2838	1837	22.9843	1154	17.0595	1225	18.6673	1344	16.979	1131	17.3474	1179	16.759	1231	18.3123	chr09	10953135	10963315	+	4204	-	GO:0006810;GO:0006869;GO:0008289	K20456	Oxysterol-binding protein-related protein 1C
MELO3C003056.2	2	0.159443	5	0.40201	1	0.0696686	3	0.246944	1	0.0848518	2	0.140689	10	0.854057	9	0.712351	5	0.414163	chr09	10977151	10979990	+	755	-	-	-	At5g12930
MELO3C003057.2	912	15.9759	825	14.5752	973	14.8951	306	5.53467	326	6.07816	357	5.51812	866	16.2517	872	15.1657	977	17.7824	chr09	11030852	11034929	+	3436	-	GO:0016301;GO:0016307;GO:0016308;GO:0016310;GO:0016740;GO:0046488;GO:0046854	K00889	Phosphatidylinositol-4-phosphate 5-kinase, putative
MELO3C003058.2	0	0	0	0	0	0	0	0	0	0	0	0	0	0	0	0	0	0	chr09	11069054	11069287	+	234	-	-	-	Unknown protein
MELO3C003061.2	1144	76.9355	1014	68.7748	1318	77.4598	1379	95.7557	1187	84.9641	1648	97.7936	1614	116.283	1340	89.4705	1327	92.7249	chr09	11136101	11137940	+	895	-	GO:0003676;GO:0003723;GO:0003735;GO:0005622;GO:0005840;GO:0006412	K02952	Ribosomal protein S13
MELO3C003062.2	0	0	0	0	0	0	0	0	0	0	0	0	0	0	0	0	0	0	chr09	11152197	11154979	-	1389	-	GO:0003676	-	protein MEI2-like 7
MELO3C003063.2	0	0	0	0	0	0	0	0	0	0	0	0	0	0	0	0	0	0	chr09	11173509	11173937	-	429	-	GO:0000166;GO:0001944;GO:0004672;GO:0004674;GO:0005515;GO:0005524;GO:0005886;GO:0006468;GO:0007275;GO:0010067;GO:0016020;GO:0016021;GO:0016301;GO:0016310;GO:0016740;GO:0030154;GO:0046777;GO:0090406	K18577	MDIS1-interacting receptor like kinase 1
MELO3C003064.2	0	0	0	0	0	0	0	0	0	0	0	0	0	0	0	0	0	0	chr09	11208250	11208486	+	237	-	-	-	Unknown protein
MELO3C003065.2	0	0	0	0	0	0	0	0	0	0	0	0	0	0	0	0	0	0	chr09	11210211	11210405	+	195	-	-	-	Unknown protein
MELO3C003066.2	3	0.191079	0	0	3	0.166983	17	1.118	7	0.474541	13	0.730613	20	1.36468	25	1.58091	21	1.38975	chr09	11276320	11277450	-	945	-	GO:0030246	-	17 kDa phloem lectin
MELO3C003069.2	394	8.87199	309	7.01736	510	10.0359	339	7.88178	275	6.59085	306	6.07993	380	9.16682	311	6.9528	283	6.62119	chr08	31800854	31807421	+	2673	-	GO:0003723;GO:0004519;GO:0009451;GO:0043231;GO:0090305	-	Pentatricopeptide repeat-containing family protein
MELO3C003071.2	437	16.5012	431	16.4136	454	14.9814	335	13.0611	463	18.608	504	16.7926	344	13.9157	416	15.5956	412	16.1643	chr08	31807606	31809199	-	1594	-	GO:0000287;GO:0000737;GO:0003677;GO:0003824;GO:0003918;GO:0005524;GO:0005634;GO:0005694;GO:0006259;GO:0006265;GO:0009330;GO:0016853	K10878	DNA topoisomerase 6 subunit A
MELO3C003072.2	52	1.67912	69	2.24707	52	1.46738	79	2.63393	53	1.82154	91	2.59282	119	4.11657	95	3.04562	95	3.18732	chr08	31809310	31814527	-	1864	-	GO:0009507;GO:0009536;GO:0016209;GO:0055114	-	Thioredoxin-like protein AAED1, chloroplastic
MELO3C003073.2	0	0	0	0	0	0	0	0	0	0	0	0	0	0	0	0	0	0	chr08	31820872	31821230	+	359	-	-	-	GATA zinc finger domain-containing protein 10-like isoform X2
MELO3C003074.2	720	32.2686	734	33.1768	808	31.646	919	42.5268	1204	57.4326	1407	55.6409	1201	57.6635	1214	54.0183	1427	66.4502	chr08	31823673	31825776	+	1343	-	GO:0004017;GO:0005524;GO:0006139;GO:0016301;GO:0016310;GO:0016776;GO:0019205;GO:0046939	K00939	Adenylate kinase
MELO3C003075.2	4691	86.7971	5011	93.5093	5787	93.5736	2397	45.7939	2062	40.6081	2446	39.9345	5016	99.4277	5299	97.3437	4954	95.2402	chr08	31836813	31845686	+	3253	-	GO:0000160;GO:0005622;GO:0005634	K12129	two-component response regulator-like APRR7
MELO3C003076.2	1852	38.881	1541	32.6279	2259	41.445	1644	35.6367	1909	42.6566	2192	40.6059	1488	33.4664	1648	34.3501	1512	32.9817	chr08	31847261	31853326	-	2867	-	GO:0016021	-	thylakoid membrane protein TERC, chloroplastic
MELO3C003077.2	0	0	0	0	0	0	0	0	0	0	0	0	0	0	0	0	0	0	chr08	31858683	31858964	+	282	-	-	-	Unknown protein
MELO3C003078.2	2693	74.5934	2480	69.2797	3248	78.6213	2153	61.5755	2378	70.1068	2702	66.0392	1776	52.7008	2113	58.1083	1964	56.5236	chr08	31860661	31863986	+	2173	-	GO:0003723;GO:0005515;GO:0005634;GO:0005654;GO:0006810;GO:0016973;GO:0051028	K18732	Protein MODIFIER OF SNC1 11
MELO3C003079.2	76	3.34878	48	2.13307	63	2.4259	78	3.54868	60	2.8139	59	2.29392	67	3.1627	74	3.23727	57	2.60959	chr08	31867421	31869192	-	1366	-	GO:0016020;GO:0016021	-	Transmembrane protein
MELO3C003080.2	267	15.0053	244	13.8298	282	13.8498	208	12.0697	208	12.4418	209	10.3641	172	10.3555	240	13.3912	282	16.4668	chr08	31867572	31874022	+	1071	-	GO:0003677	-	Dirigent protein 17
MELO3C003081.2	354	16.3776	382	17.8238	464	18.7596	317	15.1428	323	15.905	415	16.9413	347	17.1983	422	19.3836	390	18.7472	chr08	31878108	31881125	-	1301	-	GO:0003676;GO:0005840	-	Ribosomal protein S24e family protein, putative
MELO3C003082.2	2	0.116874	0	0	0	0	1	0.0603373	5	0.310986	6	0.309379	9	0.563429	11	0.638195	13	0.789322	chr08	31887853	31888882	-	1030	-	GO:0005576	-	pathogenesis-related protein 1A
MELO3C003083.2	418	10.4007	448	11.2423	441	9.58929	411	10.5592	424	11.2289	501	10.9996	272	7.25048	331	8.17693	314	8.11787	chr08	31896528	31900450	+	2419	-	GO:0016020;GO:0016021;GO:0016874	-	Valine--trna ligase
MELO3C003084.2	0	0	0	0	0	0	0	0	0	0	0	0	0	0	0	0	0	0	chr08	31899294	31899770	-	477	-	-	-	Unknown protein
MELO3C003085.2	280	25.0791	261	23.5768	309	24.1865	610	56.4136	512	48.81	503	39.7535	212	20.3423	262	23.2986	238	22.1491	chr08	31901374	31902681	-	672	-	GO:0008168;GO:0032259	K06940	Flagellin N-methylase
MELO3C003086.2	2706	85.678	2760	88.1335	3033	83.9217	4531	148.127	5056	170.386	6391	178.551	2197	74.5215	2765	86.9183	2757	90.6991	chr08	31905851	31907751	-	1901	-	GO:0016021	-	protein GPR107
MELO3C003088.2	637	11.123	603	10.6192	607	9.26257	651	11.7372	298	5.53838	295	4.54524	752	14.0673	802	13.9037	838	15.2038	chr08	31909321	31915312	+	3447	-	GO:0000139;GO:0006629;GO:0006886;GO:0008654;GO:0016036;GO:0019375;GO:0032586	K15728	Phosphatidate phosphatase PAH1
MELO3C003090.2	11	0.506571	23	1.06823	20	0.804893	4	0.190199	5	0.245077	8	0.32508	3	0.148006	6	0.27433	3	0.143547	chr08	31932723	31952660	+	1307	-	-	-	BnaC04g45100D protein
MELO3C003091.2	0	0	0	0	0	0	0	0	0	0	0	0	0	0	0	0	0	0	chr08	31960354	31960884	+	531	-	GO:0016301;GO:0016310	-	LOW QUALITY PROTEIN: probable membrane-associated kinase regulator 4
MELO3C003092.2	138	3.2663	138	3.29418	207	4.28162	42	1.02642	50	1.2596	58	1.21132	142	3.60061	156	3.66586	167	4.10694	chr08	31967798	31972849	-	2543	-	GO:0016020;GO:0016021	-	Ankyrin repeat-containing protein
MELO3C003093.2	616	22.5255	780	28.766	764	24.4145	285	10.7606	240	9.34091	301	9.71209	745	29.185	425	15.4297	404	15.3497	chr08	31975773	31979585	+	1646	-	GO:0016829;GO:0030570;GO:0045490;GO:0046872	K01728	Pectate lyase
MELO3C003094.2	0	0	0	0	1	0.0269466	0	0	0	0	0	0	1	0.0330335	0	0	0	0	chr08	31980739	31982690	-	1952	-	GO:0000145;GO:0006887	K07195	exocyst complex component EXO70A1
MELO3C003095.2	19	1.05988	47	2.64418	64	3.11991	1	0.0575973	0	0	1	0.0492215	49	2.92825	49	2.71377	18	1.04328	chr08	31989836	31992676	+	1079	-	GO:0030001;GO:0046872	-	heavy metal-associated isoprenylated plant protein 3-like
MELO3C003096.2	1409	23.6694	1037	17.569	1234	18.1156	234	4.05875	241	4.30902	260	3.85392	887	15.9629	1714	28.5866	1520	26.5305	chr08	31994423	31999747	-	3583	-	GO:0016740	-	Phosphatidylinositol N-acetyglucosaminlytransferase subunit P-related
MELO3C003097.2	1091	40.2372	1008	37.4934	1256	40.4812	103	3.9223	147	5.77039	165	5.36958	1083	42.79	1167	42.7316	1138	43.6084	chr08	32003211	32007029	-	1632	-	-	-	Protein SLOW GREEN 1, chloroplastic
MELO3C003098.2	1740	106.542	931	57.4924	2041	109.213	87	5.50033	119	7.75535	89	4.80853	1122	73.5992	2673	162.496	2420	153.961	chr08	32011682	32012848	-	983	-	GO:0016829	-	Argininosuccinate lyase
MELO3C003099.2	52	2.07002	54	2.16798	39	1.35674	7	0.28772	10	0.423698	14	0.491759	51	2.17497	46	1.81804	40	1.65446	chr08	32023579	32025090	-	1512	-	GO:0006810;GO:0016020;GO:0016021;GO:0055085	-	Pentatricopeptide repeat-containing protein
MELO3C003100.2	2598	90.0768	1952	68.2566	3111	94.2615	1720	61.5747	1988	73.3626	2356	72.0778	2436	90.4819	3179	109.431	2917	105.084	chr08	32027427	32031150	+	1736	-	GO:0005737;GO:0008837;GO:0009089	K01778	diaminopimelate epimerase, chloroplastic
MELO3C003101.2	11	0.159809	4	0.0586083	13	0.165049	6	0.0900036	6	0.0927778	10	0.128192	11	0.171203	13	0.187511	3	0.045285	chr08	32032761	32039848	+	4143	-	GO:0000166;GO:0003774;GO:0003777;GO:0005524;GO:0007018;GO:0008017	K10398	kinesin-like protein KIN-5B
MELO3C003103.2	26	2.29463	15	1.33512	15	1.15689	115	10.4794	75	7.04506	47	3.66007	136	12.8584	64	5.60782	82	7.51931	chr08	32043535	32044216	+	682	-	GO:0003676	-	zinc finger protein ZAT11
MELO3C003104.2	2561	77.3051	2634	80.1872	2635	69.5087	2077	64.7343	2015	64.7378	2439	64.9625	1927	62.3147	2266	67.9099	2349	73.6726	chr08	32048232	32050634	+	1994	-	GO:0005737;GO:0006415;GO:0016149	K03265	eukaryotic peptide chain release factor subunit 1-3
MELO3C003105.2	52	2.00891	87	3.38974	95	3.2073	2	0.0797785	2	0.0822376	8	0.272708	68	2.81433	68	2.60819	65	2.60912	chr08	32052756	32055547	-	1558	-	GO:0016020;GO:0016021;GO:0022857;GO:0055085	-	WAT1-related protein
MELO3C003106.2	1647	86.4279	1645	87.0596	1661	76.1711	977	52.9364	834	46.5812	1200	55.5641	1122	63.0759	1323	68.9278	1281	69.8448	chr08	32072695	32077879	-	1147	-	GO:0003924;GO:0005525	K07901	ras-related protein RABE1a
MELO3C003107.2	700	12.8259	695	12.8429	628	10.0556	2296	43.437	2219	43.2743	2832	45.7861	679	13.3281	830	15.0987	995	18.9424	chr08	32107256	32115031	+	3285	-	GO:0000287;GO:0004427;GO:0005737;GO:0006796	K01507	Soluble inorganic pyrophosphatase-like protein
MELO3C003108.2	0	0	0	0	0	0	1	0.0684443	1	0.0705541	4	0.233965	0	0	0	0	0	0	chr08	32112083	32115103	-	908	-	GO:0000786;GO:0003677;GO:0005634;GO:0005694;GO:0046982	K11251	Histone H2A
MELO3C003109.2	117	7.29008	138	8.67194	131	7.1331	82	5.27546	124	8.22342	120	6.59751	171	11.4144	194	12.0011	199	12.8832	chr08	32116250	32118618	-	966	-	GO:0003676	-	glycine-rich RNA-binding protein 4, mitochondrial
MELO3C003110.2	381	21.2928	385	21.7	408	19.9264	480	27.698	526	31.288	714	35.2094	274	16.4047	320	17.7555	261	15.1556	chr08	32120233	32122625	+	1077	-	GO:0003779;GO:0005622;GO:0015629;GO:0030042	K05765	Actin-depolymerizing factor family protein
MELO3C003111.2	228	4.99392	199	4.39593	233	4.45988	28	0.633235	43	1.00244	84	1.62345	246	5.77235	187	4.06652	201	4.57433	chr08	32160522	32163269	+	2748	-	GO:0003824;GO:0006281	-	Pentatricopeptide repeat-containing protein
MELO3C003112.2	109	9.79209	95	8.60722	137	10.7555	14	1.2986	23	2.19918	31	2.45733	79	7.60302	57	5.08391	44	4.10701	chr08	32166252	32166921	+	670	-	GO:0016020;GO:0016021	-	Forkhead box protein G1
MELO3C003113.2	0	0	8	0.181747	10	0.196855	1	0.0232588	0	0	4	0.079506	1	0.0241322	1	0.0223646	8	0.187241	chr08	32167130	32172597	-	2672	-	GO:0006812;GO:0015299;GO:0016021;GO:0055085;GO:1902600	-	cation/H(+) antiporter 20
MELO3C003114.2	1291	100.654	1243	97.739	1515	103.224	989	79.6164	1168	96.9245	1510	103.881	1471	122.865	1607	124.393	1416	114.708	chr08	32186573	32187894	+	772	-	GO:0016020;GO:0016021	-	Mitochondrial ATP synthase 6 kDa subunit
MELO3C003115.2	58	2.88037	60	3.00513	67	2.90774	133	6.81981	150	7.9286	135	5.91572	94	5.00103	82	4.04305	73	3.76677	chr08	32188334	32191891	-	1212	-	GO:0000778;GO:0007275	-	Protein EMBRYO DEFECTIVE 1674
MELO3C003116.2	782	28.4402	696	25.5285	858	27.2693	361	13.556	380	14.7093	458	14.6975	688	26.8055	696	25.131	722	27.2827	chr08	32193109	32195466	-	1655	-	-	-	Ubiquitin system component Cue
MELO3C003117.2	0	0	0	0	0	0	0	0	1	0.388261	0	0	0	0	0	0	0	0	chr08	32196215	32196379	-	165	-	-	-	Unknown protein
MELO3C003118.2	154	3.79576	91	2.26209	48	1.0339	5	0.127247	1	0.0262339	4	0.0869942	37	0.97699	27	0.660718	28	0.717069	chr08	32197663	32201725	-	2442	-	GO:0016020;GO:0016021	-	p-hydroxybenzoic acid efflux pump subunit aaeB
MELO3C003119.2	4667	110.637	3856	92.191	3190	66.0864	69873	1710.29	58453	1474.86	67618	1414.41	16321	414.494	12147	285.894	19704	485.333	chr08	32218919	32222106	+	2539	-	GO:0000166;GO:0005524	K03283	Heat shock 70 kDa protein
MELO3C003120.2	1745	47.3754	1866	51.0929	2193	52.0304	2320	65.0348	2175	62.8494	2715	65.04	1475	42.9003	1453	39.165	1368	38.5895	chr08	32223352	32226081	-	2217	-	GO:0042538	-	SLT1
MELO3C003121.2	115	4.99411	77	3.37242	109	4.13664	32	1.43486	30	1.38665	27	1.03461	52	2.41921	110	4.74272	78	3.51949	chr08	32243761	32245781	+	1386	-	-	-	Unknown protein
MELO3C003122.2	357	19.5166	347	19.1318	392	18.7276	450	25.4009	563	32.7589	590	28.4604	339	19.8539	328	17.8027	312	17.7221	chr08	32248794	32254699	-	1101	-	GO:0006508;GO:0008233	-	Presequence protease, mitochondrial
MELO3C003123.2	1685	45.8914	2103	57.7645	2442	58.1216	2605	73.2553	2359	68.3823	2828	67.9615	2187	63.8102	2160	58.4063	2446	69.217	chr08	32293307	32297877	+	2210	-	GO:0008270;GO:0016874	-	E3 ubiquitin-protein ligase XB3-like
MELO3C003124.2	8	0.16513	15	0.312261	12	0.21646	1	0.0213126	1	0.0219695	0	0	3	0.0663388	6	0.122959	4	0.0857869	chr08	32304484	32309973	-	2916	-	GO:0005840	-	60S ribosomal protein L36
MELO3C003126.2	10	0.175225	3	0.0530162	4	0.0612516	7	0.126647	8	0.149201	1	0.0154614	9	0.168947	6	0.104381	13	0.236682	chr08	32317916	32323401	-	3435	-	GO:0003824	K20241	WD repeat-containing protein 44
MELO3C003127.2	0	0	1	0.133122	0	0	0	0	0	0	0	0	1	0.141406	0	0	0	0	chr08	32327572	32328027	-	456	-	GO:0016301;GO:0016310	-	cyclin-dependent protein kinase inhibitor SMR3-like
MELO3C003128.2	1	0.0378553	0	0	1	0.0330816	3	0.117259	0	0	0	0	0	0	0	0	0	0	chr08	32337111	32340056	+	1590	-	GO:0000166;GO:0005524	K10355	Actin
MELO3C003129.2	177	6.0843	133	4.61084	188	5.64749	43	1.52618	40	1.46346	63	1.91087	146	5.37651	174	5.93829	173	6.17886	chr08	32342599	32351395	+	1751	-	GO:0004583;GO:0005789;GO:0006488;GO:0016020;GO:0016021;GO:0016740	K03850	Dol-P-Glc:Glc(2)Man(9)GlcNAc(2)-PP-Dol alpha-1,2-glucosyltransferase
MELO3C003130.2	312	8.78356	325	9.22762	355	8.73383	12	0.348816	19	0.569316	14	0.347773	239	7.20816	261	7.2951	241	7.04949	chr08	32359723	32371547	+	2138	-	GO:0005576;GO:0005618;GO:0016787;GO:0071555	K19882	Pectin acetylesterase
MELO3C003131.2	19	0.474133	15	0.37751	15	0.327113	20	0.515319	30	0.796805	31	0.682591	21	0.561405	20	0.495508	21	0.54449	chr08	32374188	32376980	-	2412	-	GO:0003824;GO:0004722;GO:0006470	-	Phosphatase 2C family protein
MELO3C003132.2	2010	213.749	1708	183.183	4806	446.633	6413	704.155	4665	528.011	4793	449.746	3632	413.774	5363	566.226	4667	515.667	chr08	32392901	32393888	+	566	-	GO:0046872	-	Metallothionein-like protein 4A
MELO3C003133.2	752	23.1998	673	20.9398	806	21.7301	1032	32.8735	557	18.2897	572	15.5709	810	26.7708	860	26.3414	975	31.2533	chr08	32409812	32412858	+	1951	-	GO:0000166;GO:0004672;GO:0004674;GO:0005524;GO:0006468;GO:0016301;GO:0016310	-	Protein kinase
MELO3C003134.2	62	3.41113	88	4.88292	48	2.30785	39	2.21549	43	2.51802	32	1.55349	173	10.1968	213	11.6348	189	10.8042	chr08	32418349	32420301	-	1094	-	GO:0005576;GO:0009664	-	Expansin
MELO3C003135.2	721	15.775	714	15.7551	857	16.386	1348	30.4525	1659	38.6335	1784	34.4414	728	17.0638	740	16.0746	693	15.754	chr08	32432682	32439111	-	2751	-	GO:0000175;GO:0000178;GO:0000932;GO:0003723;GO:0004518;GO:0004527;GO:0005739;GO:0006364;GO:0006401;GO:0008859;GO:0009507;GO:0009536;GO:0009658;GO:0016787;GO:0090305;GO:0090503	-	Ribonuclease II, chloroplastic/mitochondrial
MELO3C003137.2	922	38.1148	649	27.0581	1059	38.2577	1703	72.6903	1483	65.2511	1720	62.7398	1598	70.77	1332	54.669	1339	57.5132	chr08	32443463	32447798	-	1456	-	GO:0005507;GO:0009507;GO:0009570;GO:0009579;GO:0042742;GO:0048046	-	NAD(P)-binding Rossmann-fold superfamily protein
MELO3C003138.2	22	0.997873	125	5.71812	29	1.14951	42	1.96699	61	2.94487	47	1.88106	4	0.194367	23	1.03575	47	2.21501	chr08	32448396	32452818	-	1327	-	GO:0008152;GO:0016787	K07025	Haloacid dehalogenase-like hydrolase
MELO3C003139.2	2781	54.7557	2599	51.609	3122	53.7182	1369	27.8312	1571	32.9222	1900	33.0091	1931	40.7306	2097	40.9922	2088	42.7153	chr08	32460257	32467046	-	3057	-	GO:0004222;GO:0005524;GO:0006508;GO:0008233;GO:0008237;GO:0008270;GO:0016020;GO:0016021	K08956	ATP-dependent zinc metalloprotease FtsH
MELO3C003140.2	0	0	0	0	0	0	0	0	0	0	0	0	0	0	0	0	0	0	chr08	32467441	32469570	-	1118	-	GO:0003700;GO:0006355;GO:0043565	-	WRKY family transcription factor
MELO3C003141.2	0	0	0	0	0	0	0	0	0	0	0	0	1	0.0495248	0	0	0	0	chr08	32479795	32482136	-	1302	-	GO:0005515;GO:0005634;GO:0005737;GO:0006351;GO:0006355;GO:0007275;GO:0009416;GO:0009639;GO:0009640;GO:0009646;GO:0010029;GO:0010114;GO:0010218;GO:0016604;GO:0031048;GO:0042803;GO:0045893;GO:0051457;GO:1901000	-	Protein FAR-RED ELONGATED HYPOCOTYL 1
MELO3C003142.2	0	0	0	0	0	0	0	0	0	0	0	0	0	0	0	0	0	0	chr08	32479822	32480049	+	228	-	GO:0004860;GO:0005515;GO:0006469;GO:0007049	-	Cyclin-dependent protein kinase inhibitor SMR4
MELO3C003143.2	1371	44.7022	1114	36.6326	1394	39.7205	634	21.3443	791	27.4506	939	27.0153	1089	38.0391	1464	47.3923	1239	41.9747	chr08	32493316	32496553	+	1846	-	GO:0016020;GO:0016021	K09562	Hsp70 nucleotide exchange factor fes1
MELO3C003144.2	5	0.366119	7	0.51694	2	0.12798	74	5.59478	99	7.71563	105	6.78412	0	0	0	0	0	0	chr08	32496763	32497666	-	822	-	GO:0016020;GO:0016021	-	Pathogenesis-related thaumatin family protein
MELO3C003145.2	583	16.3593	470	13.301	765	18.7594	87	2.52067	101	3.01649	158	3.91206	351	10.5515	589	16.4092	531	15.4816	chr08	32502240	32508863	-	2145	-	GO:0005634	K18813	Cyclin d, putative
MELO3C003146.2	63	1.85881	10	0.297567	47	1.21186	67	2.04112	48	1.50737	84	2.18688	72	2.27581	69	2.02124	101	3.09627	chr08	32552244	32554855	-	2040	-	GO:0004672;GO:0005524;GO:0006468;GO:0016301;GO:0016310;GO:0030246	-	L-type lectin-domain containing receptor kinase IV.1-like
MELO3C003147.2	1971	60.8381	1072	33.3714	2163	58.3453	272	8.66877	345	11.3342	327	8.90614	1024	33.861	1794	54.9776	1560	50.0309	chr08	32577048	32579075	+	1950	-	GO:0004672;GO:0005524;GO:0006468;GO:0016301;GO:0016310;GO:0030246	-	LOW QUALITY PROTEIN: L-type lectin-domain containing receptor kinase S.4-like
MELO3C003148.2	502	19.7486	95	3.76918	271	9.31669	19	0.771766	13	0.544327	5	0.173562	506	21.3252	794	31.0118	901	36.8283	chr08	32585524	32587053	-	1530	-	GO:0016020;GO:0016021	-	Phosphate transporter PHO1-like protein 5
MELO3C003149.2	0	0	0	0	0	0	0	0	1	0.0663179	0	0	0	0	0	0	0	0	chr08	32599577	32600542	-	966	-	GO:0003676	-	SUPERMAN-like zinc finger protein
MELO3C003150.2	377	9.29983	258	6.41866	251	5.41088	85	2.16497	106	2.78307	108	2.35077	261	6.89739	167	4.09001	193	4.9467	chr08	32612525	32616584	+	2440	-	GO:0000785;GO:0003682;GO:0005085;GO:0005515;GO:0005634;GO:0005737;GO:0005829;GO:0007165;GO:0009411;GO:0009649;GO:0009881;GO:0010224;GO:0018298;GO:0042803;GO:0043547;GO:0050896	-	Ultraviolet-B receptor UVR8
MELO3C003151.2	0	0	0	0	0	0	0	0	0	0	0	0	0	0	0	0	0	0	chr08	32618561	32619088	+	528	-	-	-	Legume-specific protein
MELO3C003153.2	37	0.864529	31	0.730517	52	1.0618	2	0.0482511	6	0.149215	5	0.103086	11	0.275347	24	0.556754	23	0.558381	chr08	32623668	32633887	+	2576	-	GO:0004672;GO:0005524;GO:0006468;GO:0016301;GO:0016310;GO:0030247	-	wall-associated receptor kinase-like 20
MELO3C003154.2	56	7.20221	67	8.69047	85	9.55338	5	0.663969	18	2.46396	11	1.24831	69	9.50686	67	8.55514	55	7.34962	chr08	32626795	32634411	-	468	-	GO:0005886;GO:0016020;GO:0016021	-	CASP-like protein
MELO3C003155.2	7	0.337333	14	0.680424	2	0.084227	0	0	5	0.256457	8	0.340176	25	1.29066	12	0.574139	32	1.60227	chr08	32640340	32642838	+	1249	-	GO:0016491;GO:0055114	K00011	aldo-keto reductase family 4 member C9-like
MELO3C003156.2	1409	60.3613	1297	56.0374	1380	51.6638	614	27.1591	822	37.4803	951	35.9485	1106	50.759	1500	63.7989	1447	64.4081	chr08	32649877	32652553	+	1405	-	GO:0016491;GO:0055114	-	aldo-keto reductase family 4 member C9-like
MELO3C003157.2	65	2.90018	33	1.48497	72	2.8074	42	1.93491	13	0.617361	27	1.06299	104	4.97113	110	4.8728	105	4.86772	chr08	32658249	32660709	+	1349	-	GO:0016491;GO:0055114	-	aldo-keto reductase family 4 member C9-like
MELO3C003158.2	3	0.122337	1	0.0411271	5	0.178184	1	0.0421053	3	0.13021	7	0.251877	3	0.13106	7	0.283407	3	0.127111	chr08	32660987	32664213	+	1476	-	GO:0016491;GO:0055114	-	aldo-keto reductase family 4 member C9-like
MELO3C003159.2	0	0	0	0	0	0	0	0	0	0	0	0	0	0	0	0	0	0	chr08	32679742	32680621	-	880	-	-	-	Cysteine/Histidine-rich C1 domain family protein, putative
MELO3C003160.2	0	0	0	0	0	0	2	0.159762	0	0	0	0	0	0	0	0	0	0	chr08	32684665	32685442	-	778	-	GO:0016020;GO:0016021	-	Cysteine/Histidine-rich C1 domain family protein, putative
MELO3C003161.2	0	0	0	0	0	0	0	0	0	0	0	0	0	0	0	0	0	0	chr08	32696168	32696749	-	582	-	GO:0016020;GO:0016021	-	Cysteine/Histidine-rich C1 domain family protein, putative
MELO3C003162.2	0	0	0	0	0	0	1	0.15121	0	0	0	0	0	0	0	0	0	0	chr08	32700650	32701060	-	411	-	-	-	early nodulin-75-like
MELO3C003163.2	3	0.204496	0	0	2	0.119139	1	0.0703822	1	0.0725516	9	0.541325	1	0.0730253	0	0	1	0.0708252	chr08	32706593	32707475	-	883	-	GO:0016020;GO:0016021	-	Cysteine/Histidine-rich C1 domain family protein, putative
MELO3C003164.2	1	0.0528909	0	0	0	0	7	0.382278	2	0.112589	0	0	0	0	0	0	1	0.0549549	chr08	32711512	32715341	-	1138	-	GO:0016020;GO:0016021	-	Cysteine/Histidine-rich C1 domain family protein, putative
MELO3C003165.2	887	41.7097	766	36.3273	1053	43.2715	810	39.3277	841	42.0914	835	34.646	946	47.6557	912	42.5778	970	47.3925	chr08	32718653	32727779	+	1280	-	GO:0004845;GO:0006223;GO:0009116;GO:0016740;GO:0016757	K00761	uracil phosphoribosyltransferase isoform X1
MELO3C003167.2	0	0	0	0	0	0	0	0	0	0	0	0	0	0	0	0	0	0	chr08	32729126	32729548	-	423	-	-	-	glycine-rich cell wall structural protein 1.0-like
MELO3C003168.2	0	0	0	0	0	0	0	0	0	0	0	0	0	0	0	0	0	0	chr08	32733429	32733665	-	237	-	-	-	glycine-rich cell wall structural protein-like
MELO3C003169.2	2	0.263991	0	0	0	0	118	16.082	45	6.32201	30	3.49408	10	1.41406	2	0.262098	9	1.23431	chr08	32762533	32764055	-	456	-	-	-	ctenidin-1-like
MELO3C003171.2	0	0	0	0	0	0	0	0	0	0	0	0	0	0	0	0	0	0	chr08	32765646	32768229	+	1802	-	GO:0005215;GO:0006810;GO:0016020	K14638	protein NRT1/ PTR FAMILY 2.8-like
MELO3C003172.2	0	0	0	0	2	0.140829	1	0.0831961	3	0.257281	0	0	0	0	0	0	0	0	chr08	32770536	32771282	+	747	-	-	-	Protein MIZU-KUSSEI 1
MELO3C003173.2	1111	29.8398	1246	33.7513	1341	31.4754	365	10.1222	402	11.4919	549	13.0109	756	21.7527	874	23.306	737	20.5671	chr08	32776370	32780450	-	2241	-	GO:0000502;GO:0004175;GO:0004298;GO:0005634;GO:0005737;GO:0005839;GO:0006508;GO:0006511;GO:0008233;GO:0016787;GO:0019773;GO:0051603	K02728	Proteasome subunit alpha type
MELO3C003174.2	94	3.77946	131	5.31207	168	5.90298	522	21.6707	435	18.6155	599	21.2511	167	7.19331	168	6.70634	212	8.8565	chr08	32786117	32789178	-	1497	-	GO:0016020;GO:0016021;GO:0055085	-	mitochondrial substrate carrier family protein B-like
MELO3C003175.2	4	0.141623	6	0.214248	1	0.030941	49	1.79131	48	1.80884	42	1.31213	7	0.265511	9	0.316367	2	0.0735748	chr08	32804202	32809221	-	1700	-	GO:0003677;GO:0006355	-	BEL1-like homeodomain protein 9 isoform X2
MELO3C003177.2	0	0	0	0	0	0	0	0	0	0	0	0	1	0.0321763	0	0	1	0.0312069	chr08	32846293	32853401	-	2004	-	GO:0005215;GO:0006810;GO:0006857;GO:0016020	K14638	protein NRT1/ PTR FAMILY 5.6
MELO3C003178.2	0	0	0	0	0	0	0	0	0	0	0	0	0	0	0	0	0	0	chr08	32855840	32856004	+	165	-	-	-	Unknown protein
MELO3C003179.2	0	0	0	0	0	0	0	0	0	0	0	0	0	0	0	0	0	0	chr08	32860915	32863497	+	1315	-	GO:0003676	K18577	DUF4283 domain protein
MELO3C003181.2	339	9.12947	384	10.4296	488	11.4849	667	18.5469	743	21.297	993	23.5965	391	11.2806	461	12.326	375	10.4931	chr08	32875513	32900925	-	2235	-	GO:0016021	-	Copper ion transmembrane transporter
MELO3C003183.2	19	2.85189	20	3.02761	11	1.44289	105	16.273	26	4.15372	73	9.6684	22	3.53763	16	2.38437	28	4.36679	chr08	32907012	32907412	+	401	-	GO:0043531	-	disease resistance protein RGA2-like
MELO3C003184.2	0	0	0	0	0	0	1	0.115516	0	0	1	0.0987174	7	0.838976	3	0.333225	2	0.232486	chr08	32927578	32928115	+	538	-	GO:0016020;GO:0016021	-	Transforming growth factor beta receptor type 3
MELO3C003185.2	3099	137.153	2867	127.968	3764	145.578	3415	156.054	3086	145.367	3962	154.722	1033	48.9774	1038	45.6096	1026	47.1799	chr08	32939462	32942769	+	1360	-	GO:0000502	K06700	Proteasome inhibitor-related
MELO3C003186.2	9879	378.495	16032	619.478	11062	370.375	3095	122.436	1935	78.9065	2470	83.502	3328	136.597	4708	179.085	3553	141.438	chr08	32983922	32986942	+	1571	-	GO:0000502	-	Proteasome inhibitor-related
MELO3C003187.2	16	0.330714	39	0.812994	30	0.541893	571	12.1862	326	7.1719	325	5.92745	40	0.885732	56	1.1492	38	0.816095	chr08	32987728	32991499	-	2912	-	GO:0005089;GO:0043547	-	rop guanine nucleotide exchange factor 7-like
MELO3C003188.2	777	44.583	912	52.7757	782	39.2117	17398	1030.74	11357	693.579	13682	692.708	596	36.6357	719	40.9592	907	54.073	chr08	33068112	33069302	+	1049	-	GO:0016740	K00799	glutathione S-transferase U8-like
MELO3C003192.2	2822	251.638	3921	352.62	3764	293.312	8158	751.11	6930	657.714	9408	740.235	2860	273.21	1578	139.702	2183	202.255	chr08	33041856	33043665	+	675	-	GO:0016740	K00799	glutathione S-transferase U8-like
MELO3C003193.2	0	0	0	0	0	0	0	0	0	0	0	0	1	0.0408368	0	0	0	0	chr08	33055582	33057244	+	1579	-	GO:0008152;GO:0016740;GO:0016757;GO:0016758	-	Glycosyltransferase
MELO3C003195.2	81	11.2856	197	27.682	213	25.9346	14082	2025.83	9031	1339.24	11324	1392.17	147	21.9416	171	23.6543	206	29.8217	chr08	33069818	33070249	-	432	-	GO:0005737	K13993	17.5 kDa class I heat shock protein
MELO3C003197.2	86	10.3734	61	7.42068	119	12.5438	12	1.49453	9	1.15545	5	0.532164	79	10.2085	178	21.3166	138	17.2953	chr08	33085047	33085545	+	499	-	GO:0005375;GO:0016021;GO:0035434	K14686	copper transporter 2-like
MELO3C003198.2	1045	27.4306	1012	26.7911	1292	29.6376	229	6.20662	303	8.46538	304	7.04118	789	22.1874	842	21.9435	801	21.8462	chr08	33087083	33094333	-	2293	-	GO:0000413;GO:0003755;GO:0016853;GO:0030154;GO:0042761	-	Peptidylprolyl isomerase
MELO3C003199.2	427	9.75744	446	10.2786	591	11.802	789	18.6159	674	16.3928	995	20.0624	727	17.7972	440	9.9824	410	9.73456	chr08	33102708	33105741	-	2634	-	-	-	G patch domain protein
MELO3C003200.2	0	0	2	0.0707089	3	0.0919041	715	25.8797	323	12.0515	281	8.69185	7	0.262882	5	0.174019	10	0.364232	chr08	33122633	33124465	-	1717	-	GO:0016740	K00799	Glutathione S-transferase
MELO3C003201.2	853	48.2537	3231	184.336	1437	71.0394	40678	2375.97	19188	1155.3	22420	1119.1	1426	86.4195	1704	95.7031	3349	196.844	chr08	33126308	33127444	-	1064	-	GO:0016740	K00799	Glutathione S-transferase
MELO3C003202.2	0	0	0	0	0	0	0	0	0	0	0	0	0	0	0	0	0	0	chr08	33137649	33138478	-	447	-	GO:0004553;GO:0005975	-	beta-galactosidase
MELO3C003204.2	54	5.0627	72	6.80788	60	4.91587	20	1.93606	33	3.29296	18	1.48906	43	4.31884	55	5.11948	39	3.79908	chr08	33153264	33153905	-	642	-	GO:0008152;GO:0016740;GO:0016757;GO:0016758	-	Glycosyltransferase
MELO3C003205.2	5932	196.611	6819	227.939	6728	194.874	1639	56.0901	1520	53.6211	1742	50.9458	3168	112.487	3855	126.855	3110	107.101	chr08	33154253	33157821	-	1816	-	GO:0016301;GO:0016310;GO:0016772	K00898	Mitochondrial pyruvate dehydrogenase kinase
MELO3C003206.2	157	4.87104	74	2.3155	155	4.20256	34	1.08918	37	1.22182	43	1.17718	89	2.95816	87	2.67988	99	3.1914	chr08	33166349	33171062	-	1940	-	GO:0016020;GO:0016021	-	Phosphate translocator-related family protein
MELO3C003207.2	236	11.4926	242	11.8853	259	11.0221	135	6.78795	129	6.6862	159	6.83211	128	6.67768	160	7.7357	171	8.65219	chr08	33172560	33175357	-	1236	-	GO:0000502;GO:0043248	K11878	proteasome assembly chaperone 4
MELO3C003208.2	1505	22.7889	1539	23.5026	1886	24.9568	1613	25.2186	1501	24.1909	1667	22.2728	1372	22.2562	1334	20.0547	1306	20.5473	chr08	33180084	33189690	+	3975	-	GO:0003677;GO:0005634	-	Calmodulin-binding transcription activator
MELO3C003209.2	0	0	0	0	0	0	0	0	0	0	0	0	0	0	0	0	0	0	chr08	33192006	33192161	-	156	-	-	-	Unknown protein
MELO3C003210.2	216	7.7618	146	5.29118	119	3.73694	558	20.7035	290	11.0915	395	12.5244	443	17.0539	697	24.8666	668	24.9408	chr08	33192071	33196347	+	1675	-	GO:0016740	-	phosphatidylinositol:ceramide inositolphosphotransferase 1
MELO3C003211.2	299	8.67733	137	4.00983	201	5.09766	45	1.34843	40	1.23555	52	1.33159	116	3.60648	268	7.7219	203	6.12119	chr08	33201241	33205382	+	2074	-	GO:0004672;GO:0005524;GO:0006468;GO:0016301;GO:0016310	-	Receptor protein kinase, putative
MELO3C003212.2	147	3.71449	173	4.40878	175	3.86438	87	2.26987	125	3.36183	117	2.60868	180	4.87264	202	5.06766	217	5.69726	chr08	33222847	33226028	-	2382	-	GO:0003677	K09422	Myb transcription factor
MELO3C003213.2	0	0	0	0	0	0	0	0	4	0.158474	0	0	0	0	0	0	0	0	chr08	33253884	33256534	+	1617	-	GO:0005507;GO:0016491;GO:0046274;GO:0048046;GO:0052716;GO:0055114	K05909	laccase-7
MELO3C003214.2	2231	76.3843	1135	39.1914	2435	72.8558	2971	105.029	2588	94.309	3205	96.8245	2817	103.324	2573	87.4619	2271	80.7879	chr08	33260824	33263674	+	1758	-	GO:0005975;GO:0016311;GO:0016491;GO:0016787;GO:0016791;GO:0032440;GO:0042132;GO:0042578;GO:0055114	K03841	Fructose-1,6-bisphosphatase, putative
MELO3C003215.2	1905	80.408	1235	52.5729	1870	68.9773	1140	49.6831	1054	47.351	1420	52.8865	1228	55.5281	1604	67.2176	1440	63.1526	chr08	33264166	33266435	+	1426	-	GO:0005975;GO:0016311;GO:0016787;GO:0016791;GO:0042132	K03841	Fructose-1,6-bisphosphatase
MELO3C003216.2	525	20.2303	553	21.4911	687	23.1345	160	6.36594	161	6.60317	142	4.82818	520	21.4663	593	22.6867	449	17.9769	chr08	33267379	33270210	+	1562	-	GO:0006355	-	transcription termination/antitermination protein NusG
MELO3C003217.2	488	18.6493	426	16.4189	518	17.2995	730	28.8049	868	35.3059	1026	34.5974	444	18.1776	534	20.2609	478	18.98	chr08	33282373	33283947	+	1575	-	GO:0016301;GO:0016310;GO:0030246	-	L-type lectin-domain containing receptor kinase VIII.2
MELO3C003218.2	5072	162.471	3996	129.096	5093	142.571	4833	159.85	5610	191.269	6691	189.121	2226	76.3893	2300	73.1475	2767	92.0939	chr08	33285023	33287183	-	1879	-	GO:0003924;GO:0005200;GO:0005525;GO:0005874;GO:0007010;GO:0007017	K07375	tubulin beta chain-like
MELO3C003219.2	2267	77.0471	1967	67.4218	2228	66.173	5434	190.688	4329	156.595	5367	160.949	1109	40.3782	1564	52.7736	1347	47.5661	chr08	33290984	33295768	-	1771	-	GO:0031072;GO:0051082	-	Chaperone protein dnaJ-like protein
MELO3C003220.2	788	29.5144	886	33.4682	801	26.2181	1721	66.5562	942	37.5528	1166	38.5353	705	28.2883	866	32.2033	887	34.5188	chr08	33298177	33302107	+	1607	-	GO:0006810;GO:0006839;GO:0016020;GO:0016021;GO:0031966	K15103	Mitochondrial uncoupling protein, putative
MELO3C003221.2	7308	145.796	7004	140.924	8873	154.696	4372	90.0592	4605	97.7827	5603	98.6328	7913	169.122	7151	141.641	7158	148.376	chr08	33317935	33323170	+	3017	-	GO:0003989;GO:0006633;GO:0009317;GO:0016740;GO:0016874	K01962	acetyl-coenzyme A carboxylase carboxyl transferase subunit alpha, chloroplastic
MELO3C003222.2	2834	57.7253	3387	69.578	3591	63.9207	1829	38.4662	1805	39.1316	2290	41.158	2578	56.2548	2917	58.9898	2837	60.0413	chr08	33326726	33338633	+	2955	-	GO:0003910;GO:0004484;GO:0004651;GO:0004725;GO:0005524;GO:0005634;GO:0006266;GO:0006281;GO:0006310;GO:0006370;GO:0006397;GO:0006470;GO:0008138;GO:0016311;GO:0016791;GO:0035335;GO:0098507	K13917	mRNA-capping enzyme
MELO3C003223.2	1084	20.5305	1257	24.0102	1142	18.9015	726	14.1973	707	14.2519	952	15.9096	1149	23.3131	1113	20.9286	1120	22.04	chr08	33341091	33347344	+	3178	-	GO:0016020;GO:0016021	-	DEFECTIVE IN EXINE FORMATION 1 family protein
MELO3C003224.2	39	0.623978	22	0.354992	26	0.363529	0	0	3	0.051087	3	0.0423525	31	0.531345	29	0.460657	15	0.249357	chr08	33355888	33366768	+	3762	-	GO:0016301;GO:0016310	-	mitogen-activated protein kinase-binding protein 1 isoform X1
MELO3C003225.2	3	0.0746773	0	0	2	0.0435068	0	0	8	0.211954	3	0.0658933	1	0.0266672	2	0.0494279	6	0.155183	chr08	33381321	33383738	+	2418	-	GO:0005886;GO:0009507;GO:0009536;GO:0010088;GO:0010233;GO:0010588;GO:0016324;GO:0022622	-	UPF0503 protein At3g09070, chloroplastic
MELO3C003226.2	131	2.8714	127	2.80748	136	2.60509	60	1.35792	62	1.44644	70	1.35386	150	3.52229	147	3.19901	115	2.61906	chr08	33395992	33398737	+	2746	-	GO:0003723;GO:0004519;GO:0009451;GO:0043231;GO:0090305	-	Pentatricopeptide repeat-containing family protein
MELO3C003227.2	111	5.69572	76	3.93305	133	5.964	25	1.32454	17	0.92845	47	2.12802	139	7.64101	70	3.56614	59	3.14559	chr08	33399159	33400447	-	1173	-	GO:0009507;GO:0009535	-	8-amino-7-oxononanoate synthase
MELO3C003228.2	23	0.5607	17	0.417967	30	0.639122	3	0.0755133	0	0	3	0.0645322	32	0.835724	26	0.629289	38	0.962522	chr08	33405710	33409031	+	2469	-	GO:0005507;GO:0005576;GO:0016491;GO:0046274;GO:0046872;GO:0048046;GO:0052716;GO:0055114	K05909	Laccase
MELO3C003229.2	512	13.77	545	14.7826	691	16.2406	149	4.13761	198	5.66778	178	4.22412	599	17.2584	566	15.1131	559	15.6207	chr08	33412281	33414995	+	2238	-	GO:0003677	-	transcription factor DIVARICATA-like
MELO3C003230.2	2145	81.8171	1388	53.3945	1777	59.2331	1986	78.216	973	39.5015	981	33.017	1154	47.1555	1390	52.6388	1253	49.6584	chr08	33450838	33452415	+	1578	-	GO:0016740;GO:0016746;GO:0016747	-	BAHD acyltransferase DCR-like
MELO3C003231.2	3	0.249062	1	0.0837291	1	0.0725514	26	2.22874	11	0.971992	4	0.293021	11	0.978337	8	0.659402	9	0.776342	chr08	33457328	33458052	+	725	-	GO:0004843;GO:0016579;GO:0016787	-	JOSEPHIN-like protein, putative
MELO3C003232.2	0	0	0	0	0	0	0	0	0	0	0	0	0	0	0	0	0	0	chr08	33471231	33472944	-	1077	-	GO:0016020;GO:0016021	-	Envelope-like protein
MELO3C003233.2	4607	148.684	4057	132.051	5417	152.779	345	11.4964	384	13.1905	511	14.5518	3022	104.484	4444	142.395	3956	132.656	chr08	33481638	33492864	-	1865	-	GO:0000166;GO:0004672;GO:0004674;GO:0005524;GO:0006468;GO:0016301;GO:0016310	K03083	Protein kinase
MELO3C003237.2	617	23.3861	624	23.8533	643	21.2983	1792	70.1311	1337	53.9372	1705	57.023	400	16.2421	396	14.9019	465	18.3126	chr08	33527336	33530335	+	1588	-	GO:0003676;GO:0046872	K13107	zinc finger CCCH domain-containing protein 25-like isoform X1
MELO3C003238.2	5164	201.439	4023	158.27	6950	236.921	4000	161.108	4217	175.084	5194	178.777	15793	659.983	11902	460.948	9778	396.308	chr08	33551182	33553058	-	1543	-	GO:0009507;GO:0009522;GO:0009523;GO:0009535;GO:0009536;GO:0009579;GO:0009765;GO:0015979;GO:0016020;GO:0016021;GO:0016168;GO:0018298	K08915	Chlorophyll a-b binding protein, chloroplastic
MELO3C003239.2	30	2.75259	20	1.85072	24	1.92438	6	0.568422	7	0.6836	12	0.971524	15	1.47442	32	2.91504	14	1.33467	chr08	33556467	33560282	+	656	-	GO:0046872	-	Protein yippee-like
MELO3C003241.2	4	0.116421	6	0.176123	4	0.10174	241	7.24252	196	6.07174	217	5.57295	5	0.155903	4	0.115587	8	0.241929	chr08	33570314	33574062	+	2068	-	GO:0016301;GO:0016310	-	proline-rich receptor-like protein kinase PERK8
MELO3C003242.2	3490	125.861	3087	112.278	4471	140.907	3475	129.396	4271	163.939	5684	180.873	2701	104.352	3326	119.087	2690	100.796	chr08	33575033	33578665	-	1669	-	GO:0005198;GO:0005905;GO:0006886;GO:0016020;GO:0016192;GO:0030130;GO:0030132;GO:0030659;GO:0031410	-	Clathrin light chain
MELO3C003243.2	706	18.1599	721	18.704	822	18.4774	2255	59.89	2236	61.2158	2628	59.6466	652	17.9666	651	16.6251	676	18.0667	chr08	33590194	33595715	+	2340	-	GO:0003723;GO:0004647;GO:0004721;GO:0005515;GO:0005634;GO:0005737;GO:0006351;GO:0006355;GO:0007275;GO:0008420;GO:0009734;GO:0016591;GO:0016787;GO:0045893;GO:0046872;GO:0070940	K18998	RNA polymerase II C-terminal domain phosphatase-like 2
MELO3C003244.2	3	0.31513	0	0	6	0.550783	24	2.60304	20	2.23606	19	1.76106	3	0.337599	2	0.20858	4	0.43657	chr08	33600652	33601224	-	573	-	-	-	Unknown protein
MELO3C003245.2	965	80.8959	756	63.9163	1082	79.266	1075	93.0481	975	86.9937	1166	86.2482	1050	94.2972	969	80.6487	872	75.9522	chr08	33601939	33602849	-	718	-	GO:0005840	K19033	30S ribosomal protein S31, chloroplastic
MELO3C003246.2	431	20.2988	411	19.522	509	20.9494	250	12.1572	170	8.52169	163	6.77381	391	19.7279	392	18.3296	291	14.24	chr08	33606014	33609274	-	1278	-	GO:0003676;GO:0004527;GO:0090305	K18327	RNA exonuclease 4-like
MELO3C003247.2	0	0	0	0	0	0	0	0	0	0	0	0	0	0	0	0	0	0	chr08	33653674	33653832	+	159	-	-	-	Unknown protein
MELO3C003249.2	954	28.1476	809	24.0731	1026	26.4546	879	26.7782	810	25.4368	1052	27.3881	538	17.0054	558	16.3457	534	16.3704	chr08	33658090	33704652	+	2040	-	GO:0005622;GO:0006886	-	target of Myb protein 1 isoform X1
MELO3C003251.2	1171	54.0095	1364	63.448	1632	65.78	751	35.7646	893	43.8378	990	40.2903	1096	54.1544	1578	72.2595	1285	61.5802	chr08	33744925	33773581	+	1305	-	GO:0016491;GO:0055114	-	alcohol dehydrogenase
MELO3C003252.2	0	0	0	0	0	0	0	0	0	0	0	0	0	0	0	0	0	0	chr08	33765682	33766014	-	333	-	GO:0008168;GO:0016740;GO:0032259	-	histone-lysine N-methyltransferase ASHR1 isoform X1
MELO3C003253.2	0	0	0	0	0	0	0	0	0	0	0	0	0	0	0	0	0	0	chr08	33772870	33773139	-	270	-	GO:0003676;GO:0003723	K13162	KH domain-containing protein family
MELO3C003254.2	10	2.18079	5	1.0997	10	1.90579	16	3.60275	11	2.55324	19	3.65612	13	3.03716	8	1.73212	5	1.13295	chr08	33791640	33791915	-	276	-	-	-	Unknown protein
MELO3C003255.2	56	2.05777	50	1.85298	50	1.60561	46	1.74529	57	2.2293	94	3.04783	47	1.8502	25	0.912062	32	1.22176	chr08	33792138	33794036	+	1638	-	GO:0000166;GO:0004672;GO:0004674;GO:0005524;GO:0005886;GO:0006468;GO:0016301;GO:0016310;GO:0016740	-	Serine/threonine-protein kinase
MELO3C003259.2	4	0.316373	4	0.319073	8	0.552954	2	0.163331	4	0.336731	0	0	7	0.593126	3	0.235578	4	0.328718	chr08	33918195	33919336	+	761	-	GO:0004609;GO:0005509;GO:0006646;GO:0008654;GO:0016540	K01613	phosphatidylserine decarboxylase proenzyme 2-like
MELO3C003260.2	0	0	3	0.4029	1	0.116371	4	0.549978	1	0.141732	1	0.1175	1	0.142658	1	0.132209	0	0	chr08	33925842	33926293	+	452	-	GO:0008168;GO:0016740;GO:0032259	-	histone-lysine N-methyltransferase ASHR1 isoform X1
MELO3C003261.2	363	9.40953	339	8.86241	444	10.0578	118	3.15823	64	1.76574	112	2.56172	320	8.88631	292	7.51482	278	7.4874	chr08	33840600	33930737	-	2322	-	GO:0000166;GO:0003924;GO:0005525;GO:0005739;GO:0005743;GO:0005759;GO:0006412;GO:0016020;GO:0016787;GO:0043022;GO:0045727	K03596	Translation factor GUF1 homolog, mitochondrial
MELO3C003262.2	752	15.7326	877	18.5044	812	14.8457	266	5.74599	298	6.63566	311	5.74112	668	14.9717	775	16.0976	824	17.9117	chr08	33949776	33962015	-	2877	-	GO:0007275;GO:0009908;GO:0030154	-	FRIGIDA-like protein
MELO3C003263.2	694	37.0317	740	39.8233	779	36.3256	211	11.6251	242	13.744	300	14.125	516	29.4968	714	37.8257	636	35.2611	chr08	33995689	34001980	+	1128	-	GO:0000139;GO:0005794;GO:0005801;GO:0006810;GO:0006888;GO:0015031;GO:0016020;GO:0016021;GO:0016192	K08495	Golgi SNAP receptor complex member 1
MELO3C003264.2	3	0.167816	2	0.112832	12	0.586615	0	0	4	0.238153	1	0.0493587	1	0.0599269	4	0.22215	4	0.232486	chr08	34007459	34009182	+	1076	-	GO:0016787	-	Serine/threonine-protein phosphatase 7 long form-like protein
MELO3C003265.2	2024	63.749	1854	58.8929	2462	67.7659	1368	44.4886	1238	41.5019	1523	42.3268	2892	97.5824	2372	74.1741	2336	76.447	chr08	34033297	34045157	+	1911	-	GO:0000166;GO:0003824;GO:0004075;GO:0005524;GO:0016874;GO:0046872	K01961	Acetyl-CoA carboxylase
MELO3C003267.2	0	0	0	0	0	0	0	0	0	0	0	0	0	0	0	0	0	0	chr08	34108080	34109207	+	1128	-	GO:0016020;GO:0016021	-	Envelope-like protein
MELO3C003268.2	0	0	0	0	0	0	0	0	0	0	0	0	0	0	0	0	0	0	chr08	34109382	34109804	+	423	-	GO:0016020;GO:0016021	-	Envelope-like protein
MELO3C003269.2	676	28.5532	491	20.9161	793	29.2713	422	18.4044	361	16.2293	537	20.0141	838	37.9195	930	39.0001	804	35.2849	chr08	34113615	34134589	+	1425	-	GO:0000049	K15437	aminoacyl tRNA synthase complex-interacting multifunctional protein 1 isoform X1
MELO3C003271.2	5	0.453921	7	0.640913	3	0.238008	0	0	2	0.193252	2	0.160211	5	0.486284	1	0.0901332	3	0.28298	chr08	34205960	34206850	+	663	-	-	-	Unknown protein
MELO3C003272.2	0	0	0	0	0	0	0	0	0	0	0	0	0	0	0	0	0	0	chr08	34211182	34211466	+	285	-	-	-	Unknown protein
MELO3C003274.2	447	67.6002	459	70.0074	538	71.1022	312	48.7186	429	69.0529	498	66.4542	317	51.3582	355	53.302	317	49.8109	chr08	34298467	34299841	+	398	-	-	-	BnaA02g25840D protein
MELO3C003275.2	0	0	1	0.0454368	0	0	0	0	0	0	0	0	0	0	0	0	0	0	chr08	34369636	34372681	+	1336	-	GO:0004601;GO:0005576;GO:0006979;GO:0016491;GO:0020037;GO:0042744;GO:0046872;GO:0055114	K00430	Peroxidase
MELO3C003277.2	5051	216.847	4024	174.231	6047	226.869	610	27.0399	817	37.3321	980	37.124	3949	181.624	4692	199.99	4072	181.639	chr08	34408673	34410659	+	1402	-	GO:0006725;GO:0008198;GO:0008270;GO:0016020;GO:0016021;GO:0016491;GO:0016701;GO:0051213;GO:0055114	K15777	4,5-dioxygenase-like protein
MELO3C003278.2	2119	39.0994	2407	44.7926	2402	38.7323	2330	44.391	2483	48.7641	3052	49.6909	1524	30.1255	1982	36.3093	1697	32.5347	chr08	34411847	34417722	-	3262	-	GO:0008270	-	PHD finger protein At1g33420
MELO3C003279.2	0	0	0	0	0	0	0	0	0	0	0	0	0	0	0	0	0	0	chr08	34439701	34440183	-	483	-	-	-	Unknown protein
MELO3C003280.2	987	24.5181	1297	32.4938	1266	27.483	912	23.3919	776	20.5171	779	17.075	1053	28.0226	758	18.6945	843	21.7582	chr08	34450510	34456206	-	2423	-	GO:0004345;GO:0005975;GO:0006006;GO:0006098;GO:0016491;GO:0050661;GO:0055114	K00036	Glucose-6-phosphate 1-dehydrogenase
MELO3C003281.2	0	0	0	0	0	0	40	8.84661	15	3.41974	26	4.91409	0	0	0	0	0	0	chr08	34456525	34456805	+	281	-	-	-	Unknown protein
MELO3C003282.2	7015	208.201	7391	221.233	8416	218.284	5673	173.847	6096	192.568	7594	198.874	4923	156.529	6129	180.601	5705	175.928	chr08	34457454	34477030	-	2028	-	GO:0016021	-	cleft lip and palate transmembrane protein 1 homolog
MELO3C003283.2	0	0	0	0	0	0	0	0	0	0	0	0	0	0	0	0	0	0	chr08	34493297	34493452	-	156	-	-	-	Unknown protein
MELO3C003284.2	2	0.113996	1	0.0574844	2	0.0996208	17	1.00048	13	0.788655	19	0.955577	27	1.64867	34	1.92404	23	1.36211	chr08	34521899	34526888	+	1056	-	GO:0016491;GO:0055114	K00011	NADP dependent sorbitol 6-phosphate dehydrogenase family protein
MELO3C003285.2	0	0	0	0	0	0	0	0	0	0	0	0	0	0	0	0	0	0	chr08	34534850	34535350	+	501	-	GO:0005634	-	VQ motif-containing protein 31
MELO3C003286.2	1016	35.3894	912	32.038	1210	36.832	458	16.472	518	19.2041	594	18.2566	784	29.2554	948	32.7841	927	33.5494	chr08	34569494	34576359	-	1728	-	GO:0000166;GO:0004672;GO:0004674;GO:0005524;GO:0006468;GO:0016301;GO:0016310;GO:0016740	K14498	Serine/threonine-protein kinase
MELO3C003287.2	211	5.41812	238	6.16359	308	6.91158	93	2.46575	123	3.36167	161	3.64791	276	7.59251	284	7.24034	268	7.15032	chr08	34601256	34605569	-	2344	-	-	-	DYAD protein
MELO3C003289.2	0	0	0	0	0	0	0	0	0	0	0	0	0	0	0	0	0	0	chr08	34621892	34622362	+	471	-	GO:0003676;GO:0008270	-	UBN2 domain-containing protein
MELO3C003290.2	652	16.0572	544	13.5118	774	16.658	36	0.915429	44	1.15335	59	1.28211	615	16.2259	651	15.9176	467	11.9499	chr08	34641834	34650000	-	2444	-	GO:0004672;GO:0005524;GO:0006468;GO:0016301;GO:0016310	K14498	serine/threonine-protein kinase SRK2G-like isoform X3
MELO3C003291.2	1886	52.0487	1670	46.481	2060	49.6816	903	25.7309	930	27.3171	1249	30.4147	1214	35.8919	1396	38.2497	1502	43.0688	chr08	34691233	34697064	+	2181	-	GO:0016020;GO:0016021	K14617	LIMR family protein
MELO3C003292.2	810	36.5197	693	31.5113	1059	41.7252	86	4.00351	128	6.14238	109	4.33632	652	31.492	736	32.9454	673	31.527	chr08	34711764	34715725	+	1335	-	GO:0008168;GO:0016740;GO:0032259	-	protein N-methyltransferase NNT1 isoform X1
MELO3C003294.2	27985	855.033	18664	575.112	32554	869.205	2255	71.1383	3735	121.46	5388	145.257	33267	1088.88	55093	1671.2	54030	1715.21	chr08	34734497	34738998	+	1970	-	GO:0006812;GO:0006816;GO:0008324;GO:0015369;GO:0016021;GO:0055085;GO:0070588;GO:0098655	K07300	vacuolar cation/proton exchanger 3
MELO3C003295.2	124	6.3791	135	7.00426	113	5.08015	539	28.6303	393	21.5186	471	21.3802	465	25.6272	399	20.3791	440	23.5188	chr08	34748723	34752648	+	1170	-	GO:0016020;GO:0016021;GO:0055085	K14684	Mitochondrial carrier protein
MELO3C003296.2	396	11.2113	319	9.10839	422	10.4408	404	11.8098	430	12.9573	455	11.3664	309	9.37193	268	7.53303	244	7.17753	chr08	34754779	34760448	+	2126	-	GO:0016020;GO:0016021	-	Protein root uvb sensitive 3
MELO3C003298.2	2261	122.053	1948	106.054	2566	121.05	910	50.7212	992	56.996	1198	57.0635	1436	83.045	2440	130.772	1977	110.887	chr08	34761143	34764630	-	1115	-	GO:0003677;GO:0005634	K10802	high mobility group B protein 1
MELO3C003299.2	59	1.9917	25	0.851144	16	0.472011	12	0.418267	6	0.21558	20	0.595737	40	1.44658	90	3.0164	58	2.03435	chr04	2570	8082	-	1783	-	GO:0016020;GO:0016021	K13946	Auxin transporter-like protein 2
MELO3C003300.2	0	0	0	0	0	0	0	0	0	0	0	0	0	0	0	0	0	0	chr04	26790	26945	-	156	-	-	-	Unknown protein
MELO3C003302.2	254	8.55525	161	5.4691	233	6.85828	32	1.11288	21	0.75284	25	0.743005	136	4.90736	190	6.35371	201	7.03428	chr04	77144	78930	+	1787	-	GO:0051260	-	BTB/POZ domain-containing protein At3g09030
MELO3C003304.2	88	6.85215	69	5.41856	103	7.00877	122	9.80853	120	9.94511	156	10.7182	84	7.00703	95	7.34416	95	7.68586	chr04	153890	169074	+	773	-	GO:0004843;GO:0006508;GO:0071108;GO:1990380	-	NF-E2 inducible protein-like
MELO3C003305.2	258	10.6363	164	6.81876	236	8.50243	196	8.34308	192	8.42473	253	9.2033	161	7.11061	177	7.24467	199	8.5241	chr04	170687	172671	-	1460	-	GO:0005737;GO:0005829;GO:0007338;GO:0009846;GO:0009860;GO:0016740	-	Protein CDI
MELO3C003306.2	0	0	0	0	0	0	0	0	0	0	0	0	0	0	0	0	0	0	chr04	176679	177599	+	921	-	GO:0001666;GO:0005576;GO:0005615;GO:0005794;GO:0009505;GO:0040007;GO:0048046	-	Protein EXORDIUM-like 1
MELO3C003307.2	0	0	0	0	0	0	0	0	1	0.0695582	0	0	0	0	0	0	0	0	chr04	182377	183297	+	921	-	GO:0001666;GO:0005576;GO:0005615;GO:0005794;GO:0009505;GO:0040007;GO:0048046	-	Protein EXORDIUM-like 1
MELO3C003308.2	444	14.8386	445	14.9989	510	14.895	247	8.52328	284	10.1021	332	9.7904	968	34.6574	774	25.6818	707	24.5501	chr04	185778	188758	+	1801	-	GO:0016301;GO:0016310;GO:0016773	-	Carbohydrate kinase-like protein
MELO3C003309.2	0	0	0	0	0	0	0	0	0	0	0	0	0	0	0	0	0	0	chr04	190340	190965	-	258	-	GO:0005783;GO:0005886	-	(RAP Annotation release2) NERD domain containing protein
MELO3C003310.2	0	0	0	0	0	0	0	0	0	0	0	0	0	0	0	0	0	0	chr04	193925	197878	-	1254	-	-	-	QWRF motif-containing protein 3
MELO3C003311.2	879	21.1628	993	24.1115	1072	22.5548	478	11.8826	646	16.5539	645	13.7024	684	17.6421	774	18.5012	764	19.1118	chr04	203784	214822	+	2500	-	GO:0016020;GO:0016021;GO:0016301;GO:0016310	-	2-phosphoglycerate kinase
MELO3C003312.2	549	17.2916	547	17.3756	792	21.7996	174	5.65864	156	5.22964	192	5.33601	705	23.7882	730	22.8276	707	23.137	chr04	216227	223461	+	1911	-	GO:0004672;GO:0005524;GO:0006468;GO:0009507;GO:0016301;GO:0016310	-	Protein kinase superfamily protein
MELO3C003313.2	4310	214.75	4274	214.774	5367	233.695	5504	283.162	5539	293.746	6792	298.612	4093	218.479	4779	236.411	4537	234.882	chr04	227208	229684	+	1208	-	GO:0016020;GO:0016021	K17278	Membrane steroid-binding protein
MELO3C003314.2	3286	186.237	2888	165.077	3526	174.639	1177	68.8772	1575	95.0088	1714	85.7161	1391	84.4572	2065	116.197	1900	111.886	chr04	236571	238752	+	1062	-	GO:0005886;GO:0006810;GO:0007267;GO:0016020;GO:0048032	-	Remorin
MELO3C003316.2	5	0.318128	1	0.0641687	5	0.278012	10	0.65695	7	0.47404	14	0.785983	9	0.613459	7	0.442186	10	0.661085	chr04	248075	249020	+	946	-	GO:0016874	K10143	Ubiquitin ligase protein cop1
MELO3C003317.2	5679	206.662	5892	216.243	6707	213.293	6085	228.638	7696	298.083	9355	300.389	7072	275.702	8353	301.79	7755	293.221	chr04	260181	263614	-	1654	-	GO:0004252;GO:0006508	K13199	Nuclear RNA-binding-like protein
MELO3C003318.2	30	1.16346	7	0.273792	2	0.0677832	18	0.720782	10	0.412778	14	0.479085	11	0.45702	3	0.115512	6	0.241773	chr04	273004	274555	-	1552	-	GO:0006629	-	phospholipase A1-Ibeta2, chloroplastic
MELO3C003319.2	0	0	0	0	2	0.154478	3	0.273777	0	0	0	0	2	0.189372	1	0.0877508	2	0.183667	chr04	283359	285241	+	681	-	GO:0030001;GO:0046872	-	heavy metal-associated isoprenylated plant protein 20 isoform X1
MELO3C003320.2	1321	88.3454	892	60.164	1237	72.2955	1778	122.776	1484	105.633	1563	92.2343	731	52.3732	858	56.9696	796	55.3119	chr04	286578	287677	+	900	-	GO:0030001;GO:0046872	-	synaptic vesicle membrane protein VAT-1 homolog
MELO3C003321.2	113	4.5013	100	4.01744	84	2.92414	34	1.39842	27	1.14474	23	0.808425	51	2.1764	100	3.95488	65	2.69028	chr04	289017	292996	-	1511	-	GO:0009409;GO:0009414;GO:0009651;GO:0009737;GO:0009738;GO:0010150	-	Low-temperature-induced 65 kDa protein
MELO3C003322.2	16	0.203044	20	0.255971	15	0.16635	3	0.039309	6	0.0810412	10	0.111976	5	0.0679752	4	0.050397	4	0.0527418	chr04	293939	303097	+	4743	-	GO:0000712;GO:0009506	-	Shortage in chiasmata 1, putative
MELO3C003323.2	952	14.7873	868	13.5976	1012	13.737	276	4.4265	307	5.07545	392	5.37267	667	11.0991	869	13.4013	730	11.7815	chr04	304100	309728	-	3875	-	-	-	Myosin heavy chain-like protein
MELO3C003324.2	3003	180.389	3453	209.191	3621	190.084	2333	144.701	1983	126.784	2672	141.627	3450	222.017	2474	147.547	2425	151.353	chr04	317397	321238	-	1002	-	GO:0016021	K08360	transmembrane ascorbate ferrireductase 1
MELO3C003325.2	2	0.487368	1	0.245763	6	1.27773	1	0.251609	2	0.518729	2	0.43004	5	1.30529	7	1.69355	3	0.759578	chr04	322749	322995	-	247	-	-	-	Unknown protein
MELO3C003326.2	255	7.9815	215	6.78693	253	6.9203	113	3.65193	126	4.19758	169	4.66749	214	7.17577	261	8.11072	156	5.07334	chr04	322693	325732	+	1923	-	GO:0016020;GO:0016021	K19323	Ataxin-10
MELO3C003327.2	3566	196.016	3547	196.635	3869	185.853	3343	189.734	3269	191.253	4095	198.617	2782	163.824	3059	166.941	2953	168.654	chr04	328326	331704	-	1095	-	GO:0003924;GO:0005525	K07874	Ras-related GTP-binding protein
MELO3C003328.2	50	1.73959	24	0.84213	69	2.09791	54	1.93986	59	2.18481	88	2.70155	67	2.49725	30	1.03627	28	1.01219	chr04	333954	340780	-	1730	-	GO:0016491;GO:0055114;GO:0071949	K00480	FAD-dependent urate hydroxylase-like
MELO3C003329.2	105	7.72609	89	6.60467	121	7.78065	58	4.40654	43	3.36762	88	5.71354	87	6.85804	85	6.2096	74	5.65753	chr04	350630	352429	-	818	-	GO:0016491;GO:0055114;GO:0071949	K00480	FAD-dependent urate hydroxylase-like
MELO3C003330.2	163	6.17818	189	7.2248	184	6.09468	148	5.79208	160	6.45472	227	7.59192	174	7.06533	156	5.87046	152	5.98606	chr04	352664	357150	+	1588	-	-	-	Dynamin
MELO3C003331.2	3050	119.285	3967	156.472	3872	132.337	14325	578.468	14289	594.8	17490	603.57	1305	54.6771	2275	88.3367	1744	70.869	chr04	358049	360734	+	1539	-	GO:0016020;GO:0016021;GO:0043066	-	BAX inhibitor-1
MELO3C003332.2	5996	176.565	6733	199.959	6860	176.534	11497	349.564	11148	349.401	14918	387.62	4557	143.758	4279	125.101	4433	135.633	chr04	361267	364157	+	2044	-	GO:0016020;GO:0016021;GO:0043066	-	BAX inhibitor-1
MELO3C003333.2	657	69.2553	634	67.4012	663	61.0747	1433	155.967	1218	136.653	1468	136.542	506	57.1411	547	57.2466	531	58.1576	chr04	364582	367883	+	571	-	-	-	AT4g17010/dl4535w
MELO3C003335.2	431	10.4943	356	8.7421	411	8.74535	457	11.4892	326	8.44845	420	9.02354	241	6.28641	235	5.68091	236	5.97052	chr04	375489	381880	+	2472	-	GO:0003700;GO:0006355;GO:0008270;GO:0043565	-	GATA transcription factor 26-like
MELO3C003336.2	0	0	0	0	0	0	0	0	0	0	4	0.195078	2	0.118423	5	0.274372	4	0.22971	chr04	387176	389237	-	1089	-	GO:0005576	-	expansin-like B1
MELO3C003337.2	0	0	0	0	0	0	0	0	0	0	0	0	0	0	0	0	0	0	chr04	404986	408427	+	1629	-	GO:0003333;GO:0015171;GO:0016020;GO:0016021	-	Cationic amino acid transporter, putative
MELO3C003338.2	710	13.1169	666	12.409	833	13.4486	404	7.70644	457	8.98614	591	9.63413	644	12.7458	639	11.7205	699	13.4176	chr04	409634	415399	-	3258	-	GO:0003677;GO:0004518;GO:0004519;GO:0090305	K10848	DNA repair endonuclease UVH1
MELO3C003339.2	934	112.21	1059	128.314	575	60.369	1956	242.636	2111	269.934	2594	274.985	2674	344.158	2395	285.671	2518	314.316	chr04	421557	424053	+	501	-	GO:0005509	K06268	Calcineurin B-like protein
MELO3C003340.2	2583	69.4375	2269	61.5169	2695	63.3124	1036	28.756	1145	32.7612	1342	31.8328	1679	48.3538	2009	53.6197	1976	55.1926	chr04	425206	431979	+	2239	-	GO:0000166;GO:0003723;GO:0004518;GO:0005829;GO:0009507;GO:0009536;GO:0016787;GO:0046872;GO:0090305	K14845	Decapping nuclease DXO homolog, chloroplastic
MELO3C003341.2	1343	55.8253	1200	50.3068	1417	51.4737	384	16.4811	479	21.1921	547	20.063	1040	46.3126	1379	56.9107	1259	54.3758	chr04	433968	439255	+	1448	-	GO:0005956;GO:0019887;GO:0045859	K03115	Casein kinase II subunit beta
MELO3C003342.2	100	9.59966	110	10.6497	126	10.5703	25	2.47797	20	2.04348	31	2.62585	77	7.91876	91	8.67305	80	7.97941	chr04	440467	442708	-	627	-	GO:0003735;GO:0005622;GO:0005840;GO:0006412	K02921	60S ribosomal protein L37a
MELO3C003343.2	13	0.181043	19	0.26686	14	0.170383	7	0.100655	3	0.0444677	4	0.0491532	16	0.238709	18	0.248878	18	0.260457	chr04	444105	451032	-	4322	-	GO:0005524	K10875	SNF2 domain-containing protein CLASSY 4-like
MELO3C003344.2	5089	157	4565	142.036	6653	179.368	4198	133.724	3842	126.156	4594	125.058	4672	154.411	4865	149.013	4627	148.317	chr04	456132	464549	+	1951	-	GO:0003861;GO:0008152;GO:0008652;GO:0016836;GO:0051539	K01703	3-isopropylmalate dehydratase large subunit
MELO3C003345.2	1167	41.7856	1152	41.6005	1217	38.0809	1597	59.0419	1824	69.5128	2021	63.852	1484	56.9246	1434	50.9776	1467	54.5771	chr04	469498	471984	+	1681	-	GO:0004672;GO:0005524;GO:0006468;GO:0016301;GO:0016310	-	Receptor-like protein kinase
MELO3C003346.2	61	4.64757	46	3.53464	99	6.59162	45	3.54005	67	5.4332	60	4.03367	47	3.83623	52	3.93346	52	4.11647	chr04	473374	474246	+	790	-	GO:0016020;GO:0016021	-	Membrane lipoprotein, putative
MELO3C003355.2	0	0	0	0	0	0	3	0.927574	6	1.91233	14	3.6992	0	0	1	0.297305	0	0	chr04	524434	524634	+	201	-	-	-	Sister chromatid cohesion protein PDS5 like B-B
MELO3C003356.2	1	0.161801	0	0	0	0	9	1.50357	6	1.03328	5	0.713844	0	0	0	0	0	0	chr04	525551	525922	+	372	-	-	-	Sister chromatid cohesion PDS5 B
MELO3C003358.2	9	1.25396	3	0.421553	5	0.608794	95	13.6667	102	15.126	76	9.34342	0	0	2	0.276659	4	0.579061	chr04	535554	536064	+	432	-	GO:0005515;GO:0005737;GO:0005856;GO:0005874;GO:0005886;GO:0005938;GO:0007049;GO:0009506;GO:0009524;GO:0009574;GO:0009733;GO:0010102;GO:0051301;GO:0055028	-	187-kDa microtubule-associated protein AIR9
MELO3C003359.2	10424	44.8894	9176	39.8523	12800	48.1704	13612	60.5245	14538	66.6344	17037	64.7374	4527	20.8848	5397	23.0747	5568	24.9134	chr04	475122	553094	-	13977	-	GO:0005773;GO:0005794;GO:0009506	K19525	Pleckstrin (PH) domain-containing protein isoform 2
MELO3C003360.2	1235	63.5338	1251	64.9061	1400	62.9399	1096	58.2168	406	22.2304	384	17.431	1248	68.7801	1093	55.8255	1295	69.2201	chr04	575236	576772	-	1170	-	GO:0004842;GO:0005634;GO:0008270;GO:0016567;GO:0016874;GO:0031347	K19042	BOI-related E3 ubiquitin-protein ligase 1
MELO3C003361.2	2	0.0467676	5	0.117917	12	0.24522	1	0.0241443	0	0	2	0.0412665	8	0.200408	21	0.487539	9	0.218667	chr04	600683	603718	-	2574	-	GO:0006812;GO:0015299;GO:0016021;GO:0055085;GO:1902600	-	cation/H(+) antiporter 1-like
MELO3C003362.2	883	9.95648	854	9.71166	1087	10.7111	97	1.12932	174	2.08823	164	1.6317	829	10.0141	1028	11.5083	881	10.3216	chr04	604707	626927	-	5338	-	GO:0016020;GO:0016021	-	Glycine-rich protein
MELO3C003366.2	2	0.106437	0	0	1	0.0465073	7	0.384644	17	0.962929	5	0.234792	5	0.285063	7	0.369857	5	0.276475	chr04	630865	633255	-	1131	-	GO:0004129;GO:0005739;GO:1902600	K02267	Cytochrome c oxidase subunit
MELO3C003367.2	0	0	1	0.0719237	0	0	1	0.0736344	2	0.151808	8	0.503412	3	0.229199	0	0	0	0	chr04	635696	636539	+	844	-	GO:0004857;GO:0043086	-	Pectinesterase inhibitor
MELO3C003368.2	362	7.2799	298	6.04399	361	6.34431	833	17.2966	797	17.0592	1027	18.2238	428	9.22085	466	9.30416	428	8.94304	chr04	636881	639873	-	2993	-	GO:0000373;GO:0005739;GO:0006397;GO:0007005;GO:0090615	-	Intron maturase, type II family protein
MELO3C003369.2	1698	89.416	1647	87.4705	1843	84.8131	417	22.6732	576	32.2838	616	28.6227	1439	81.1799	1558	81.4553	1587	86.8318	chr04	641868	647287	+	1143	-	GO:0003924;GO:0005525	K07893	Ras-related protein
MELO3C003370.2	3	0.085497	9	0.25868	2	0.0498104	30	0.882776	37	1.12232	51	1.28249	4	0.122124	2	0.0565893	0	0	chr04	649334	658587	+	2112	-	GO:0003924;GO:0005525	K01528	dynamin-related protein 1E-like
MELO3C003371.2	214	12.7279	191	11.4569	81	4.21006	130	7.98337	193	12.2176	223	11.7031	40	2.54867	33	1.94864	40	2.47188	chr04	659823	662194	+	1012	-	GO:0005576	-	Expansin-like protein
MELO3C003372.2	256	16.2367	228	14.5842	272	15.076	450	29.4693	231	15.5939	257	14.3828	395	26.8389	380	23.9285	557	36.706	chr04	663163	664111	+	949	-	GO:0003677	-	dnaJ homolog subfamily C member 2
MELO3C003373.2	594	119.176	524	106.029	669	117.298	293	60.6974	348	74.3132	373	66.0334	387	83.1809	440	87.6455	397	82.7594	chr04	665354	665653	+	300	-	GO:0016491;GO:0055114	-	Allyl alcohol dehydrogenase-like protein
MELO3C003374.2	258	10.3114	321	12.9388	288	10.0589	665	27.4423	519	22.0775	713	25.1444	176	7.53567	262	10.3962	200	8.30526	chr04	668031	675216	+	1506	-	GO:0005639;GO:0016020;GO:0016021	-	Inner nuclear membrane Man1
MELO3C003375.2	29802	685.172	26851	622.594	29911	600.96	342	8.11858	288	7.04743	310	6.28881	10923	269.033	15990	364.987	13215	315.679	chr04	685189	692142	+	2618	-	GO:0000160;GO:0003677;GO:0005634;GO:0006351;GO:0006355	-	Two-component response regulator-like protein APRR2
MELO3C003376.2	3125	142.82	3031	139.706	3872	154.644	2308	108.911	2535	123.31	2905	117.148	2216	108.497	2685	121.831	2354	111.781	chr04	692958	698590	+	1317	-	GO:0016021	-	tobamovirus multiplication protein 2A
MELO3C003377.2	12	0.464488	38	1.48343	18	0.608872	427	17.0656	435	17.9212	380	12.9786	8	0.331737	5	0.192149	3	0.120653	chr04	698822	701231	+	1555	-	GO:0004601;GO:0005576;GO:0006979;GO:0016491;GO:0020037;GO:0042744;GO:0046872;GO:0055114	K00430	Peroxidase
MELO3C003378.2	245	18.4794	284	21.6038	344	22.6746	120	9.34548	159	12.7644	185	12.3125	172	13.8982	225	16.8491	185	14.4983	chr04	701841	705184	+	798	-	GO:0046786	-	Tobamovirus multiplication protein 2B
MELO3C003379.2	53	1.62014	64	1.9731	93	2.4844	78	2.46191	91	2.96076	92	2.48152	82	2.68536	104	3.15635	123	3.90668	chr04	710745	715479	+	1969	-	GO:0000287;GO:0004749;GO:0009116;GO:0009156;GO:0009165;GO:0016301;GO:0016310;GO:0016740;GO:0044249	K00948	Ribose-phosphate pyrophosphokinase, putative
MELO3C003380.2	0	0	2	0.199028	7	0.603604	0	0	2	0.210043	2	0.174131	3	0.317121	2	0.195929	1	0.102522	chr04	716320	716929	-	610	-	-	-	egg cell-secreted protein 1.2-like
MELO3C003381.2	1677	34.7345	1813	37.8718	1704	30.8431	276	5.90251	323	7.12057	299	5.46452	1766	39.1858	2361	48.551	2423	52.1442	chr04	722132	729855	+	2906	-	GO:0000287;GO:0003824;GO:0004743;GO:0006096;GO:0016301;GO:0016310;GO:0016740;GO:0030955	K00873	Pyruvate kinase
MELO3C003382.2	1661	35.9883	1200	26.2218	2421	45.8402	84	1.87919	116	2.67506	113	2.16034	916	21.2617	2074	44.6144	1787	40.2291	chr04	728198	733275	-	2778	-	GO:0005215;GO:0006810;GO:0016020	K14638	protein NRT1/ PTR FAMILY 7.3-like
MELO3C003384.2	1	0.045633	3	0.138067	2	0.0797571	7	0.32982	3	0.145708	7	0.281857	15	0.733298	50	2.26529	23	1.09051	chr04	766009	790483	+	1319	-	GO:0004497;GO:0005506;GO:0016020;GO:0016021;GO:0016491;GO:0016705;GO:0020037;GO:0046872;GO:0055114	K04123	Cytochrome P450 family ent-kaurenoic acid oxidase
MELO3C003385.2	26	0.958908	16	0.595133	21	0.676835	20	0.761611	29	1.13838	36	1.17154	69	2.72623	270	9.88648	216	8.27717	chr04	789473	796703	-	1632	-	GO:0004497;GO:0005506;GO:0016491;GO:0016705;GO:0020037;GO:0046872;GO:0055114	K04123	Cytochrome P450
MELO3C003386.2	202	10.3124	234	12.048	232	10.3504	1463	77.1177	843	45.8059	948	42.7042	726	39.7061	511	25.9003	549	29.121	chr04	800640	803070	+	1179	-	GO:0005960;GO:0019464	K02437	glycine cleavage system H protein, mitochondrial
MELO3C003387.2	14	0.481519	0	0	2	0.060114	0	0	1	0.0366075	3	0.0910457	0	0	0	0	0	0	chr04	803312	806955	-	1750	-	GO:0004497;GO:0005506;GO:0016020;GO:0016021;GO:0016491;GO:0016705;GO:0020037;GO:0046872;GO:0055114	K04123	Cytochrome P450 family ent-kaurenoic acid oxidase
MELO3C003388.2	27	2.09154	12	0.937507	12	0.812352	7	0.559887	1	0.0824493	1	0.0683526	17	1.41079	11	0.845999	13	1.04633	chr04	817708	820004	-	777	-	GO:0016226	K09015	protein ABCI7, chloroplastic-like
MELO3C003389.2	736	23.7915	640	20.8648	885	25.0004	87	2.90378	122	4.19747	123	3.50834	956	33.1064	857	27.5042	752	25.2573	chr04	820565	825134	-	1862	-	GO:0016226	K09015	protein ABCI7, chloroplastic-like
MELO3C003390.2	45	1.70886	59	2.25963	27	0.896022	37	1.45076	200	8.08367	196	6.56754	66	2.68503	66	2.48836	28	1.10478	chr04	827421	829663	-	1585	-	GO:0003677;GO:0005634;GO:0006351;GO:0006355	-	NAC domain protein,
MELO3C003391.2	1248	19.9302	1189	19.1501	1513	21.1153	1372	22.6231	1595	27.1108	1931	27.2102	1007	17.2281	983	15.5857	1077	17.8705	chr04	840194	849209	+	3769	-	GO:0003743;GO:0005669;GO:0006352;GO:0006413	K03129	transcription initiation factor TFIID subunit 4b
[truncated: 28,096 more rows]

## Sheet: Sheet4
Supplementary Table S4. Up- and downregulated genes in comparison between Group A and B.
[truncated: 20,781 more rows]

## Sheet: Sheet5
Supplementary Table S5. Up- and downregulated genes in comparison between Group B and C.
[truncated: 20,795 more rows]

[truncated: 8 more sheets: Sheet6, Sheet7, Sheet8, Sheet9, Sheet10, Sheet11, Sheet12, Sheet13]
